# Supplementary material for: Dynamic Regulation of Vascular Myosin Light Chain (MYL9) with Injury and Aging
Source: PLoS One. 2011 Oct 7;6(10):e25855. doi: 10.1371/journal.pone.0025855 (PMC3189218; doi:10.1371/journal.pone.0025855)
Supplement: Table S1 — B: Differentially Expressed Genes in Old Injured Versus Young Control Iliac Arteries at 3 Days Post-Injury. Listed are the 924 total transcripts differentially expressed by 2 fold (p<.05 with no multiple correction) in old Injured versus young control iliac arteries at 3 days post injury (n = 3 per group). (XLS) [file pone.0025855.s001.xls]

## Sheet: 30 min inj w age p05
GeneSymbol	GeneName	Description	ID	p-value	regulation	FCAbsolute	UniGeneID
		AA819664 UI-R-A0-bh-a-06-0-UI.s1 UI-R-A0 Rattus norvegicus cDNA clone UI-R-A0-bh-a-06-0-UI 3' similar to dbj [AA819664]	A_44_P244495	0.0441918	down	1.43895	Rn.107401
RGD1562607	similar to Serine/threonine/tyrosine interacting protein (Protein tyrosine phosphatase-like protein)	PREDICTED: Rattus norvegicus similar to Serine/threonine/tyrosine-interacting protein (Protein tyrosine phosphatase-like protein) (Phosphoserine/threonine/tyrosine interaction protein) (LOC686177), mRNA [XM_001072778]	A_44_P400693	0.0366992	down	1.1558	Rn.205855
			(+)E1A_r60_a20	0.0410532	down	2.16084
Adhfe1	alcohol dehydrogenase, iron containing, 1"		A_44_P412710	0.0164331	up	1.72689	chr5:9287499-9287440
Pde4dip	phosphodiesterase 4D interacting protein	Rattus norvegicus phosphodiesterase 4D interacting protein (Pde4dip), mRNA [NM_022382]	A_44_P428146	0.0281361	up	1.49666	Rn.48693
			A_44_P470862	0.0215094	down	1.08791
Cdh2	cadherin 2	Rattus norvegicus cadherin 2 (Cdh2), mRNA [NM_031333]	A_44_P349475	0.0142961	up	1.32169	Rn.23200
			A_44_P951025	0.0460929	down	1.1037
		EST223173 Normalized rat spleen, Bento Soares Rattus sp. cDNA clone RSPCH66 3' end, mRNA sequence [AI179460]	A_44_P127070	0.0434353	down	1.18116	Rn.216536
Cadps2	Ca++-dependent secretion activator 2	PREDICTED: Rattus norvegicus similar to Ca2+-dependent activator for secretion protein 2 (predicted) (RGD1559440_predicted), mRNA [XM_231528]	A_44_P461489	0.0491248	up	1.18983	Rn.91746
		BG377273 UI-R-CU0-bux-e-05-0-UI.s1 UI-R-CU0 Rattus norvegicus cDNA clone UI-R-CU0-bux-e-05-0-UI 3', mRNA sequence [BG377273]	A_44_P363927	0.0158353	down	1.19342	Rn.16922
			A_44_P767445	0.0166421	up	1.32672
		BM388504 UI-R-DZ0-ckm-m-23-0-UI.s1 NCI_CGAP_DZ0 Rattus norvegicus cDNA clone IMAGE:7337761 3', mRNA sequence [BM388504]	A_44_P488247	0.017825	up	1.18874	Rn.204254
Ireb2	iron responsive element binding protein 2	Iron-responsive element-binding protein 2 (IRE-BP 2) (Iron regulatory protein 2) (IRP2). [Source:UniProtKB/Swiss-Prot;Acc:Q62751] [ENSRNOT00000017900]	A_43_P12328	0.0102551	up	1.14773	Rn.10132
		AI409218 EST237510 Normalized rat kidney, Bento Soares Rattus sp. cDNA clone RKIDN64 3' end, mRNA sequence [AI409218]	A_44_P303336	0.0120089	up	1.11622	Rn.7582
		AI104225 EST213514 Normalized rat heart, Bento Soares Rattus sp. cDNA clone RHEBZ04 3' end, mRNA sequence [AI104225]	A_44_P435371	0.0249588	down	1.1578	Rn.774
Serpinf1	serine (or cysteine) peptidase inhibitor, clade F, member 1"		A_44_P144202	0.0480603	down	1.84592	chr10:62714177-62714118
		AI010220 EST204671 Normalized rat lung, Bento Soares Rattus sp. cDNA clone RLUBV33 3' end, mRNA sequence [AI010220]	A_44_P300846	0.00654814	up	1.05589	Rn.99994
Trmt1	TRM1 tRNA methyltransferase 1 homolog (S. cerevisiae)	Rattus norvegicus TRM1 tRNA methyltransferase 1 homolog (S. cerevisiae) (Trmt1), mRNA [NM_001013870]	A_44_P503964	0.0404543	up	1.04455	Rn.17073
			(+)E1A_r60_a107	0.0157167	down	2.96168
		AA859796 UI-R-E0-bu-g-10-0-UI.s1 UI-R-E0 Rattus norvegicus cDNA clone UI-R-E0-bu-g-10-0-UI 3' similar to gi [AA859796]	A_44_P408862	0.0395815	down	2.16347	Rn.101984
			(+)E1A_r60_a22	0.0156811	down	1.70863
Sycp3	synaptonemal complex protein 3	Rattus norvegicus synaptonemal complex protein 3 (Sycp3), mRNA [NM_013041]	A_44_P459191	0.0466328	up	1.78311	Rn.34889
Ppm2c	protein phosphatase 2C, magnesium dependent, catalytic subunit"		A_43_P14919	0.0400297	up	1.22746	chr5:26234599-26234540
LOC680025	similar to nuclear RNA export factor 2	PREDICTED: Rattus norvegicus similar to nuclear RNA export factor 2 (LOC680025), mRNA [XM_001055368]	A_44_P135765	0.0341429	down	1.08385	Rn.101740
		AI105089 EST214378 Normalized rat heart, Bento Soares Rattus sp. cDNA clone RHECN51 3' end, mRNA sequence [AI105089]	A_44_P145977	0.0213527	up	1.0203	Rn.3289
Trpc4ap	transient receptor potential cation channel, subfamily C, member 4 associated protein"		A_44_P375322	0.000768493	up	1.60397	chr3:146143350-146143291
Hgf	hepatocyte growth factor	Rattus norvegicus hepatocyte growth factor (Hgf), mRNA [NM_017017]	A_44_P367525	0.0267743	up	1.18071	Rn.10468
Tyrobp	Tyro protein tyrosine kinase binding protein	EST211808 Normalized rat embryo, Bento Soares Rattus sp. cDNA clone REMBO71 3' end, mRNA sequence [AI102519]	A_44_P526676	0.0272079	down	1.13885	Rn.11534
isg12(b)	putative ISG12(b) protein	UI-R-BS2-bes-c-08-0-UI.s1 UI-R-BS2 Rattus norvegicus cDNA clone UI-R-BS2-bes-c-08-0-UI 3', mRNA sequence [BF398773]	A_44_P246411	0.0208039	down	1.24893	Rn.22509
Tmem87a	transmembrane protein 87A	PREDICTED: Rattus norvegicus transmembrane protein 87A (predicted) (Tmem87a_predicted), mRNA [XM_345422]	A_44_P324410	0.00449807	up	1.53251	Rn.212423
Olr411	olfactory receptor 411	Rattus norvegicus olfactory receptor 411 (Olr411), mRNA [NM_001000385]	A_44_P146767	0.00464328	up	1.14411	Rn.143028
		UI-R-FS0-crs-h-21-0-UI.s1 UI-R-FS0 Rattus norvegicus cDNA clone UI-R-FS0-crs-h-21-0-UI 3', mRNA sequence [CB327381]	A_44_P148087	0.0185203	down	1.24418	Rn.50664
Etv1	ets variant 1	Rattus norvegicus ets variant 1 (Etv1), mRNA [NM_001108709]	A_44_P315647	0.0353244	up	1.54553	Rn.76536
Mitd1	MIT, microtubule interacting and transport, domain containing 1"		A_44_P502793	0.0135946	up	1.27668	chr9:36831612-36831553
			(+)E1A_r60_n9	0.01524	down	2.81839
		BM389664 UI-R-CN1-cjo-m-21-0-UI.s1 UI-R-CN1 Rattus norvegicus cDNA clone UI-R-CN1-cjo-m-21-0-UI 3', mRNA sequence [BM389664]	A_44_P449238	0.0165343	up	1.07999	Rn.16376
Psmc2	proteasome (prosome, macropain) 26S subunit, ATPase 2"		A_42_P609658	0.0384866	up	1.14155	chr4:8704246-8704187
		Dystrophin (Fragment). [Source:UniProtKB/Swiss-Prot;Acc:P11530] [ENSRNOT00000035692]	A_44_P1070896	0.0256075	down	1.15624
			(+)E1A_r60_1	0.0304254	down	2.41194
Zfp36l3	zinc finger protein 36, C3H type-like 3"		A_44_P459660	0.00712819	down	1.13338	chrX:140993897-140993956
		AI179984 EST223715 Normalized rat spleen, Bento Soares Rattus sp. cDNA clone RSPCO51 3' end, mRNA sequence [AI179984]	A_44_P433021	0.0103537	down	1.75734	Rn.16993
Snap91	synaptosomal-associated protein 91	Rattus norvegicus synaptosomal-associated protein 91 (Snap91), mRNA [NM_031728]	A_44_P284462	0.0497232	down	1.12648	Rn.11022
Ash1l	ash1 (absent, small, or homeotic)-like (Drosophila)"		A_44_P165466	0.0420665	up	1.27615	chr2:181150829-181150888
Slc37a3	solute carrier family 37 (glycerol-3-phosphate transporter), member 3"		A_44_P898880	0.0333835	down	1.44294	chr4:66841065-66841006
CYTB	cytochrome b	Cytochrome b (Ubiquinol-cytochrome-c reductase complex cytochrome b subunit) (Cytochrome b-c1 complex subunit 3) (Complex III subunit 3) (Complex III subunit III). [Source:UniProtKB/Swiss-Prot;Acc:P00159] [ENSRNOT00000042098]	A_44_P437565	0.0486557	up	1.26749	Rn.202984
Padi2	peptidyl arginine deiminase, type II"		A_42_P499767	0.0361742	down	1.24276	chr5:159805340-159805399
Ngfr	nerve growth factor receptor (TNFR superfamily, member 16)"		A_44_P556989	0.00513905	up	1.45106	chr10:84263141-84263082
Aer61	glycosyltransferase Aer61	Rattus norvegicus glycosyltransferase Aer61 (Aer61), mRNA [NM_001009502]	A_44_P785427	0.0182596	down	1.25642	Rn.162760
Edem1	ER degradation enhancer, mannosidase alpha-like 1"		A_43_P17475	0.0419438	down	1.15956	chr4:144379186-144379245
		AI013847 EST208522 Normalized rat spleen, Bento Soares Rattus sp. cDNA clone RSPBV58 3' end, mRNA sequence [AI013847]	A_44_P537854	0.0292693	down	1.17161	Rn.8408
		Rattus norvegicus similar to RIKEN cDNA 1700001F09 (LOC364243), mRNA [XM_344288]	A_44_P151953	0.0190654	down	1.63857
Immt	inner membrane protein, mitochondrial"		A_44_P1049236	0.0380268	up	1.44775	chr4:105137330-105137389
Naf1	nuclear assembly factor 1 homolog (S. cerevisiae)	Rattus norvegicus nuclear assembly factor 1 homolog (S. cerevisiae) (Naf1), mRNA [NM_001024772]	A_43_P22238	0.0434504	up	1.2896	Rn.162269
Rnf6	ring finger protein (C3H2C3 type) 6	Rattus norvegicus ring finger protein (C3H2C3 type) 6 (Rnf6), mRNA [NM_001107118]	A_42_P654739	0.00788492	up	1.32235	Rn.53030
Cdh11	cadherin 11	PREDICTED: Rattus norvegicus cadherin 11 (Cdh11), mRNA [XM_341639]	A_44_P961744	0.00976771	up	1.69283	Rn.8900
		AA944422 EST199921 Normalized rat embryo, Bento Soares Rattus sp. cDNA clone REMAJ01 3' end, mRNA sequence [AA944422]	A_44_P103918	0.0167131	down	1.31255	Rn.57635
			A_44_P730016	0.023025	down	1.44713
Lrp5	low density lipoprotein receptor-related protein 5	Rattus norvegicus low density lipoprotein receptor-related protein 5 (Lrp5), mRNA [NM_001106321]	A_44_P1024900	0.012471	up	1.30778	Rn.12698
		AA894221 EST198024 Normalized rat spleen, Bento Soares Rattus sp. cDNA clone RSPAT16 3' end, mRNA sequence [AA894221]	A_44_P305105	0.00203889	down	1.29015	Rn.203210
		AA924826 UI-R-A1-eg-g-04-0-UI.s1 UI-R-A1 Rattus norvegicus cDNA clone UI-R-A1-eg-g-04-0-UI 3' similar to gi [AA924826]	A_44_P173811	0.0403627	up	1.23352
RGD1560686	similar to sidekick 1	Rattus norvegicus similar to sidekick-like protein 1 (LOC304297), mRNA [XM_221932]	A_43_P19051	0.0363343	down	1.54585	Rn.200728
Dnah9	dynein, axonemal, heavy polypeptide 9"		A_44_P190639	0.0201705	down	1.29558	chr10:52516768-52516827
		Rattus norvegicus similar to hypothetical protein MGC15606 (LOC288534), mRNA [XM_213731]	A_44_P489661	0.0234634	down	1.1428
Olr34	olfactory receptor 34	Rattus norvegicus olfactory receptor 34 (Olr34), mRNA [NM_001000689]	A_44_P428495	0.0273975	down	1.2285	Rn.141940
			(+)E1A_r60_a104	0.0345727	down	2.21603
		BF562074 UI-R-E1-fm-c-04-0-UI.r1 UI-R-E1 Rattus norvegicus cDNA clone UI-R-E1-fm-c-04-0-UI 5', mRNA sequence [BF562074]	A_44_P394586	0.00417209	down	1.09348	Rn.211924
Tnfrsf11b	tumor necrosis factor receptor superfamily, member 11b"		A_44_P458021	0.0483923	up	2.20624	chr7:90606941-90606882
		AI044861 UI-R-C1-kd-d-07-0-UI.s1 UI-R-C1 Rattus norvegicus cDNA clone UI-R-C1-kd-d-07-0-UI 3', mRNA sequence [AI044861]	A_44_P247328	0.0452391	down	1.08644	Rn.4175
			A_44_P898658	0.022826	up	1.58221
		Shultzomica02895 Rat lung airway and parenchyma cDNA libraries Rattus norvegicus cDNA clone Contig2531 5', mRNA sequence [CF109644]	A_44_P463235	0.0399359	up	1.13957	Rn.23284
Olr1449	olfactory receptor 1449	Rattus norvegicus olfactory receptor 1449 (Olr1449), mRNA [NM_001000775]	A_44_P442645	0.00301898	down	1.09541	Rn.142129
			A_44_P579028	0.048741	up	1.12764
Pcdh12	protocadherin 12	Vascular endothelial cadherin-2 (Fragment). [Source:UniProtKB/TrEMBL;Acc:Q9JIT9] [ENSRNOT00000026065]	A_44_P391638	0.0365793	up	1.01326	Rn.214946
Agrn	agrin	Rattus norvegicus agrin (Agrn), mRNA [NM_175754]	A_44_P416633	0.013705	down	1.03547	Rn.2163
Ptk2	PTK2 protein tyrosine kinase 2	Focal adhesion kinase 1 (EC 2.7.10.2) (FADK 1) (pp125FAK). [Source:UniProtKB/Swiss-Prot;Acc:O35346] [ENSRNOT00000011219]	A_44_P868335	0.0185402	up	1.10781
		AGENCOURT_112397880 NIH_MGC_429 Rattus norvegicus cDNA clone IMAGE:9031480 5', mRNA sequence [EV773784]	A_44_P809056	0.0316617	up	1.42022	Rn.130885
			A_44_P447738	0.0312566	down	1.36474
Mag	myelin-associated glycoprotein	Rattus norvegicus myelin-associated glycoprotein (Mag), mRNA [NM_017190]	A_44_P557233	0.0261666	down	1.14697	Rn.87331
		AI412429 EST240728 Normalized rat brain, Bento Soares Rattus sp. cDNA clone RBRDO67 3' end, mRNA sequence [AI412429]	A_44_P273255	0.0172042	down	1.37324	Rn.205920
Fmo3	flavin containing monooxygenase 3	Rattus norvegicus flavin containing monooxygenase 3 (Fmo3), mRNA [NM_053433]	A_44_P358194	0.020313	up	1.63724	Rn.163228
Top3b	topoisomerase (DNA) III beta	Rattus norvegicus topoisomerase (DNA) III beta (Top3b), mRNA [NM_001105861]	A_42_P716940	0.0103505	up	1.29432	Rn.23773
		Rattus norvegicus similar to RIKEN cDNA 9330182L06 (LOC296811), mRNA [XM_216079]	A_44_P283909	0.00783832	up	1.13076
			A_44_P614767	0.0353265	up	1.235
		PREDICTED: Rattus norvegicus similar to KP78b CG17216-PA (LOC365506), mRNA [XM_345061]	A_44_P281248	0.0315679	down	1.08759	Rn.133056
		AI170660 EST216595 Normalized rat muscle, Bento Soares Rattus sp. cDNA clone RMUAZ59 3' end, mRNA sequence [AI170660]	A_44_P488939	0.0353834	up	1.04376	Rn.172403
		BM383868 UI-R-DM1-ckc-g-06-0-UI.s1 UI-R-DM1 Rattus norvegicus cDNA clone UI-R-DM1-ckc-g-06-0-UI 3', mRNA sequence [BM383868]	A_44_P138472	0.048949	up	1.08717	Rn.35982
		BE119385 UI-R-CA0-bah-h-11-0-UI.s1 UI-R-CA0 Rattus norvegicus cDNA clone UI-R-CA0-bah-h-11-0-UI 3', mRNA sequence [BE119385]	A_44_P803194	0.00205053	down	1.28777	Rn.198998
		AA875054 UI-R-E0-cb-e-04-0-UI.s1 UI-R-E0 Rattus norvegicus cDNA clone UI-R-E0-cb-e-04-0-UI 3' similar to gi [AA875054]	A_44_P115721	0.0276506	up	1.38033	Rn.7102
Chmp4b	chromatin modifying protein 4B	PREDICTED: Rattus norvegicus similar to RIKEN cDNA 2010012F05 (predicted) (RGD1309846_predicted), mRNA [XM_001073409]	A_44_P295308	0.0253652	up	1.39604
Hcn1	hyperpolarization-activated cyclic nucleotide-gated potassium channel 1	Rattus norvegicus hyperpolarization-activated cyclic nucleotide-gated potassium channel 1 (Hcn1), mRNA [NM_053375]	A_44_P1053605	0.0138536	down	1.07886	Rn.21408
Pqlc3	PQ loop repeat containing 3	Rattus norvegicus PQ loop repeat containing 3 (Pqlc3), mRNA [NM_001034952]	A_44_P206395	0.0462227	up	1.2214	Rn.12743
		AA859398 UI-R-E0-bt-c-10-0-UI.s1 UI-R-E0 Rattus norvegicus cDNA clone UI-R-E0-bt-c-10-0-UI 3' similar to gb [AA859398]	A_44_P619807	0.00568625	down	1.28035	Rn.17456
		AI101521 EST210810 Normalized rat brain, Bento Soares Rattus sp. cDNA clone RBRBR60 3' end, mRNA sequence [AI101521]	A_44_P421226	0.0211741	down	1.55494	Rn.95324
		UI-R-BS1-axy-e-10-0-UI.s1 UI-R-BS1 Rattus norvegicus cDNA clone UI-R-BS1-axy-e-10-0-UI 3', mRNA sequence [BE116019]	A_44_P298522	0.0074124	down	1.91109	Rn.48491
Pga5	pepsinogen 5, group I (pepsinogen A)"		A_44_P1001451	0.00271061	up	1.14575	chr1:213164010-213163951
			A_44_P157060	0.0365416	down	1.29474
		BF546233 UI-R-C2p-sb-e-04-0-UI.r1 UI-R-C2p Rattus norvegicus cDNA clone UI-R-C2p-sb-e-04-0-UI 5', mRNA sequence [BF546233]	A_44_P204499	0.046782	down	1.09248	Rn.81585
Olr299	olfactory receptor 299	Rattus norvegicus olfactory receptor 299 (Olr299), mRNA [NM_001000236]	A_44_P341936	0.00514431	up	1.072	Rn.141738
			A_44_P541308	0.0402114	down	1.11394
		UI-R-BJ1-awb-f-12-0-UI.s1 UI-R-BJ1 Rattus norvegicus cDNA clone UI-R-BJ1-awb-f-12-0-UI 3', mRNA sequence [BE113113]	A_44_P216903	0.00409123	up	1.38555	Rn.168988
Fkbp1b	FK506 binding protein 1b	Rattus norvegicus FK506 binding protein 1b (Fkbp1b), mRNA [NM_022675]	A_44_P126868	0.0195462	down	1.25468	Rn.46439
Lrfn5	leucine rich repeat and fibronectin type III domain containing 5	Rattus norvegicus leucine rich repeat and fibronectin type III domain containing 5 (Lrfn5), mRNA [NM_001108024]	A_44_P553341	0.0091101	up	1.13036	Rn.16847
Ercc8	excision repair cross-complementing rodent repair deficiency, complementation group 8"		A_43_P18920	0.0337614	up	1.26248	chr2:39395068-39398312
			A_44_P623610	0.0170684	up	1.1963
Tcfap2c	transcription factor AP-2, gamma"		A_44_P327890	0.0227749	down	1.04592	chr3:163466731-163466790
Csgalnact1	chondroitin sulfate N-acetylgalactosaminyltransferase 1	Rattus norvegicus chondroitin sulfate N-acetylgalactosaminyltransferase 1, mRNA (cDNA clone MGC:189091 IMAGE:7459880), complete cds [BC168857]	A_42_P573352	0.0367445	up	1.26188	Rn.162264
Adcy4	adenylate cyclase 4	Rattus norvegicus adenylate cyclase 4 (Adcy4), mRNA [NM_019285]	A_44_P111816	0.0306924	up	1.38619	Rn.1904
			A_44_P776488	0.00570115	up	1.39769
			A_44_P779316	0.021162	down	1.31579
		Q7TQ12_RAT (Q7TQ12) Aa1114, partial (10%) [TC598825]	A_44_P653304	0.0358173	down	1.33827
Sfrp5	secreted frizzled-related protein 5	Rattus norvegicus secreted frizzled-related protein 5 (Sfrp5), mRNA [NM_001107591]	A_44_P591196	0.0270161	down	1.20654	Rn.40184
Ly9	lymphocyte antigen 9	PREDICTED: Rattus norvegicus lymphocyte antigen 9 (predicted) (Ly9_predicted), mRNA [XM_222892]	A_44_P440719	0.00328134	down	1.08999	Rn.104826
Fggy	FGGY carbohydrate kinase domain containing	Rattus norvegicus FGGY carbohydrate kinase domain containing (Fggy), mRNA [NM_001013932]	A_42_P667100	0.0350454	up	1.16961	Rn.8436
			A_44_P241532	0.00659481	down	1.36912
		UI-R-DZ1-cne-h-12-0-UI.s1 UI-R-DZ1 Rattus norvegicus cDNA clone UI-R-DZ1-cne-h-12-0-UI 3', mRNA sequence [BQ201397]	A_44_P331983	0.0330784	down	1.85087	Rn.3706
			A_44_P523281	0.00155683	down	1.29411
		BE116924 UI-R-BS1-azg-d-07-0-UI.s1 UI-R-BS1 Rattus norvegicus cDNA clone UI-R-BS1-azg-d-07-0-UI 3', mRNA sequence [BE116924]	A_44_P251176	0.0422906	up	1.42848	Rn.135690
		Q53895_STRCO (Q53895) AbaA protein, partial (13%) [TC591651]	A_44_P250976	0.0106637	up	1.57198
		Q5ENL5_HETTR (Q5ENL5) Calrectulin (Fragment), partial (7%) [TC633399]	A_44_P1037363	0.0186402	down	1.71485
		AW918387 EST349691 Rat gene index, normalized rat, norvegicus, Bento Soares Rattus norvegicus cDNA clone RGIER58 5' end, mRNA sequence [AW918387]	A_42_P768732	0.00849539	up	1.47152	Rn.148916
			A_44_P747073	0.0479355	up	1.07838
Olr1052	olfactory receptor 1052	Rattus norvegicus olfactory receptor 1052 (Olr1052), mRNA [NM_001001363]	A_44_P428566	0.00797737	up	1.10925	Rn.143355
Hmgb1	high mobility group box 1	Rattus norvegicus high mobility group box 1 (Hmgb1), mRNA [NM_012963]	A_44_P103832	0.0440948	up	1.1894	Rn.144565
		BE109603 UI-R-BJ1-avq-a-09-0-UI.s1 UI-R-BJ1 Rattus norvegicus cDNA clone UI-R-BJ1-avq-a-09-0-UI 3', mRNA sequence [BE109603]	A_44_P336626	0.0353091	down	1.37314	Rn.21800
Tff3	trefoil factor 3, intestinal"		A_43_P11676	0.0497242	down	1.65987	chr20:009469962-009469906
Dnajb5	DnaJ (Hsp40) homolog, subfamily B, member 5"		A_44_P331706	0.00717819	up	1.1916	chr5:59445882-59445941
Tmem35	transmembrane protein 35	Rattus norvegicus transmembrane protein 35 (Tmem35), mRNA [NM_001001799]	A_44_P1032042	0.0223544	down	1.27525	Rn.45854
Itpkc	inositol 1,4,5-trisphosphate 3-kinase C"		A_44_P156211	0.04068	down	1.59526	chr1:82285355-82285296
			A_44_P410050	0.0212776	down	1.06744
		PREDICTED: Rattus norvegicus similar to hypothetical protein FLJ11331 (predicted) (RGD1305834_predicted), mRNA [XM_227717]	A_44_P417175	0.00796475	down	1.35156	Rn.79854
Cxcl12	chemokine (C-X-C motif) ligand 12 (stromal cell-derived factor 1)	Rattus norvegicus chemokine (C-X-C motif) ligand 12 (stromal cell-derived factor 1) (Cxcl12), transcript variant 1, mRNA [NM_022177]	A_44_P1034439	0.0313269	up	1.4862	Rn.54439
			A_44_P917107	0.049981	up	1.48507
		RNU78140 Rattus norvegicus zinc finger protein 12 (DZF12) mRNA, partial cds [U78140]	A_44_P109680	0.0424445	up	1.45045	Rn.12040
Hdac10	histone deacetylase 10	Rattus norvegicus histone deacetylase 10 (Hdac10), mRNA [NM_001035000]	A_44_P121935	0.00708124	up	1.25361	Rn.107028
		AI599828 EST251531 Normalized rat embryo, Bento Soares Rattus sp. cDNA clone REMEM30 3' end, mRNA sequence [AI599828]	A_44_P277794	0.0433458	down	1.09433	Rn.11980
		AGENCOURT_28540553 NIH_MGC_249 Rattus norvegicus cDNA clone IMAGE:7376431 5', mRNA sequence [CO571155]	A_44_P907030	0.00644209	down	1.48885	Rn.170022
		PREDICTED: Rattus norvegicus TBC1 domain family, member 22a (predicted) (Tbc1d22a_predicted), mRNA [XM_001078492]	A_44_P128888	0.00213801	down	1.25169
Olr1146	olfactory receptor 1146	PREDICTED: Rattus norvegicus olfactory receptor 1146 (predicted) (Olr1146_predicted), mRNA [XM_235904]	A_44_P154656	0.00291319	up	1.38471
Mapk8ip2	mitogen-activated protein kinase 8 interacting protein 2	Mapk8ip2 protein (Fragment). [Source:UniProtKB/TrEMBL;Acc:Q3B8P9] [ENSRNOT00000051148]	A_43_P21136	0.0325308	down	1.17738	Rn.91464
Slc9a4	solute carrier family 9 (sodium/hydrogen exchanger), member 4"		A_44_P440273	0.0259289	down	1.38822	chr9:39767758-39771829
LOC290577	hypothetical LOC290577	PREDICTED: Rattus norvegicus hypothetical LOC290577 (LOC290577), mRNA [XR_006087]	A_44_P272006	0.000527818	up	1.17239	Rn.8014
			A_44_P746478	0.0321472	up	1.16875
Amy2-3	amylase 2-3, pancreatic"		A_44_P161473	0.00874773	down	1.10446	chr2:209441675-209437274
LOC690653	similar to filaggrin 2	PREDICTED: Rattus norvegicus similar to filaggrin 2 (LOC690653), mRNA [XM_001075107]	A_44_P119039	0.019987	down	1.2739
		BF547960 UI-R-E0-bq-d-01-0-UI.r1 UI-R-E0 Rattus norvegicus cDNA clone UI-R-E0-bq-d-01-0-UI 5', mRNA sequence [BF547960]	A_44_P1036329	0.0305951	up	1.16333	Rn.163656
		UI-R-C1-kk-e-12-0-UI.s1 UI-R-C1 Rattus norvegicus cDNA clone UI-R-C1-kk-e-12-0-UI 3', mRNA sequence [AI045171]	A_44_P394993	0.016092	up	1.23776	Rn.166099
		Protein phosphatase 1 regulatory subunit 12A (Myosin phosphatase- targeting subunit 1) (Myosin phosphatase target subunit 1) (Protein phosphatase myosin-binding subunit) (MBSP) (Serine/threonine protein phosphatase PP1 smooth muscle regulatory subunit M11 [Source:UniProtKB/Swiss-Prot;Acc:Q10728] [ENSRNOT00000041473]	A_44_P285874	0.0257045	up	1.13736	Rn.162937
LOC688241	similar to GTPase activating protein testicular GAP1	PREDICTED: Rattus norvegicus similar to GTPase activating protein testicular GAP1 (LOC688839), mRNA [XR_006494]	A_44_P504077	0.0332461	down	1.27609	Rn.155020
		BI282748 UI-R-CW0s-cce-g-02-0-UI.s1 UI-R-CW0s Rattus norvegicus cDNA clone UI-R-CW0s-cce-g-02-0-UI 3', mRNA sequence [BI282748]	A_44_P350858	0.0117847	down	3.07046	Rn.107239
Pou5f2	POU domain class 5, transcription factor 2"		A_44_P508286	0.0035391	up	1.2756	chr2:5622030-5622089
		PREDICTED: Rattus norvegicus cache domain containing 1 (predicted) (Cachd1_predicted), mRNA [XM_233227]	A_44_P480757	0.023864	up	1.19986	Rn.64271
Purg	purine-rich element binding protein G	PREDICTED: Rattus norvegicus purine-rich element binding protein G (predicted) (Purg_predicted), mRNA [XM_341448]	A_42_P722989	0.028839	up	1.13506	Rn.88554
		UI-R-BT0-qa-f-05-0-UI.r1 UI-R-BT0 Rattus norvegicus cDNA clone UI-R-BT0-qa-f-05-0-UI 5', mRNA sequence [BF545749]	A_44_P803922	0.00022853	down	1.39072	Rn.63875
Serping1	serine (or cysteine) peptidase inhibitor, clade G, member 1"		A_42_P510386	0.0384391	up	1.45734	chr3:67968887-67968828
LOC289943	similar to heat shock protein 1 (chaperonin)	PREDICTED: Rattus norvegicus similar to heat shock protein 1 (chaperonin) (LOC289943), mRNA [XR_008381]	A_44_P170884	0.0482018	up	1.2967	Rn.197124
Accn2	amiloride-sensitive cation channel 2, neuronal"		A_44_P109573	0.030472	up	1.07202	chr7:138440776-138440912
Hfe	hemochromatosis	BM986242 EST531696 Rat gene index, normalized rat, norvegicus Rattus norvegicus cDNA clone RGIAC22 3' end similar to hereditary haemochromatosis-like protein, mRNA sequence [BM986242]	A_44_P167749	0.0497105	down	1.09217	Rn.42931
Atp13a5	ATPase type 13A5	Rattus norvegicus similar to putative ATPase (LOC303856), mRNA [XM_221354]	A_44_P274860	0.0245815	up	1.06698	Rn.58246
		UI-R-BJ2-bqv-a-02-0-UI.s1 UI-R-BJ2 Rattus norvegicus cDNA clone UI-R-BJ2-bqv-a-02-0-UI 3', mRNA sequence [BF407666]	A_44_P453810	0.040354	up	1.3685	Rn.160487
LOC302026	similar to heat shock protein 1 (chaperonin)	PREDICTED: Rattus norvegicus similar to heat shock protein 1 (chaperonin) (LOC302026), mRNA [XR_005540]	A_44_P318722	0.0045297	down	1.22726	Rn.197213
		CA506981 UI-R-FJ0-cqc-p-18-0-UI.s1 UI-R-FJ0 Rattus norvegicus cDNA clone UI-R-FJ0-cqc-p-18-0-UI 3', mRNA sequence [CA506981]	A_44_P429832	0.0337429	down	1.24198	Rn.203187
Hmox2	heme oxygenase (decycling) 2	Rattus norvegicus heme oxygenase (decycling) 2 (Hmox2), mRNA [NM_024387]	A_44_P500907	0.0263746	down	1.15317	Rn.10241
		Rattus norvegicus chromosome 20, major histocompatibility complex, assembled from 40 BACs, strain Brown Norway (BN/ssNHsd), RT1n haplotype; segment 4/11 [BX883045]	A_44_P1028012	0.0307504	up	1.11145
Map7d2	MAP7 domain containing 2	PREDICTED: Rattus norvegicus similar to hypothetical protein FLJ14503 (predicted) (RGD1564852_predicted), mRNA [XM_228973]	A_44_P374447	0.0327269	down	1.04403	Rn.92968
Erg	avian erythroblastosis virus E-26 (v-ets) oncogene related	Rattus norvegicus avian erythroblastosis virus E-26 (v-ets) oncogene related (Erg), mRNA [NM_133397]	A_42_P525876	0.034791	up	1.46333	Rn.50673
Cytl1	cytokine like 1	Rattus norvegicus cytokine like 1 (Cytl1), mRNA [NM_001134604]	A_44_P699345	0.0119193	up	2.03301	Rn.8720
RT1-A2	RT1 class Ia, locus A2"		A_44_P184753	0.0117804	up	1.7049	chr20:5024064-5024217
Cdc16	CDC16 cell division cycle 16 homolog (S. cerevisiae)	Rattus norvegicus CDC16 cell division cycle 16 homolog (S. cerevisiae) (Cdc16), mRNA [NM_001024744]	A_44_P999630	0.0298663	up	1.13783	Rn.66098
		AI045132 UI-R-C1-kg-f-06-0-UI.s1 UI-R-C1 Rattus norvegicus cDNA clone UI-R-C1-kg-f-06-0-UI 3', mRNA sequence [AI045132]	A_44_P176479	0.0431696	up	1.08788	Rn.97119
		AW917621 EST348925 Rat gene index, normalized rat, norvegicus, Bento Soares Rattus norvegicus cDNA clone RGIEG12 5' end, mRNA sequence [AW917621]	A_44_P327492	0.043391	down	1.0641	Rn.6589
Wasf1	WAS protein family, member 1"		A_44_P403227	0.0272866	down	1.40828	chr20_random:488947-489006
Stox2	storkhead box 2	Rattus norvegicus spinelinin mRNA, complete cds [AF548355]	A_44_P505964	0.00852871	down	1.14511	Rn.61768
LOC686091	similar to coiled-coil domain containing 13	PREDICTED: Rattus norvegicus similar to coiled-coil domain containing 13 (LOC686091), mRNA [XM_001066510]	A_44_P222887	0.0442024	down	1.13494	Rn.143427
		BF561025 UI-R-E1-fj-f-09-0-UI.r1 UI-R-E1 Rattus norvegicus cDNA clone UI-R-E1-fj-f-09-0-UI 5', mRNA sequence [BF561025]	A_44_P476260	0.00112789	down	1.18694	Rn.147483
Car11	carbonic anhydrase 11	Rattus norvegicus carbonic anhydrase-related XI protein (CAR-XI), mRNA [NM_175708]	A_44_P250065	0.000475872	up	1.49403	Rn.44281
Calca	calcitonin/calcitonin-related polypeptide, alpha"		A_44_P527089	0.0274846	up	1.07416	chr1:172686443-172686316
		UI-R-CA1-bix-l-03-0-UI.s1 UI-R-CA1 Rattus norvegicus cDNA clone UI-R-CA1-bix-l-03-0-UI 3', mRNA sequence [BF403853]	A_44_P355405	0.0162633	up	1.36265	Rn.42977
		AA924532 UI-R-A1-dz-e-02-0-UI.s1 UI-R-A1 Rattus norvegicus cDNA clone UI-R-A1-dz-e-02-0-UI 3' similar to gi [AA924532]	A_44_P393156	0.0118214	up	1.27508	Rn.72440
Fasn	fatty acid synthase	Rattus norvegicus fatty acid synthase (Fasn), mRNA [NM_017332]	A_44_P235978	0.0383121	down	2.76664	Rn.9486
Slco1a6	solute carrier organic anion transporter family, member 1a6"		A_44_P320677	0.00647807	up	1.05807	chr4:179696888-179696829
Gpr132	G protein-coupled receptor 132	PREDICTED: Rattus norvegicus G protein-coupled receptor 132 (predicted) (Gpr132_predicted), mRNA [XM_001073056]	A_44_P199413	0.00632236	up	1.18691
Stmn1	stathmin 1	Rattus norvegicus stathmin 1 (Stmn1), mRNA [NM_017166]	A_43_P11845	0.0210221	down	1.34564	Rn.555
Hpn	hepsin (transmembrane protease, serine 1)"		A_44_P329357	0.0157327	up	1.15217	chr1:86146154-86145931
Ccdc109a	coiled-coil domain containing 109A	Rattus norvegicus coiled-coil domain containing 109A (Ccdc109a), mRNA [NM_001106398]	A_44_P469920	0.0276772	down	1.42962	Rn.44172
		AI137349 UI-R-C2p-og-c-07-0-UI.s1 UI-R-C2p Rattus norvegicus cDNA clone UI-R-C2p-og-c-07-0-UI 3', mRNA sequence [AI137349]	A_44_P858839	0.0256852	up	1.54344	Rn.204532
Mta2	metastasis associated 1 family, member 2"		A_42_P788749	0.00323123	up	1.14709	chr1:211627135-211627194
Tbx15	T-box 15	T-box 15 [Source:RefSeq_peptide;Acc:NP_001099921] [ENSRNOT00000026570]	A_44_P147276	0.034295	down	1.07268
Mybph	myosin binding protein H	Rattus norvegicus myosin binding protein H (Mybph), mRNA [NM_031813]	A_44_P385066	0.0137968	down	1.13554	Rn.23666
		Q6D6S3_ERWCT (Q6D6S3) Mobilization protein, partial (5%) [TC591951]	A_43_P10625	0.0231921	up	1.17968
		Rattus norvegicus similar to Cell division protein kinase 8 (Protein kinase K35) (LOC304270), mRNA [XM_221887]	A_44_P267155	0.0350393	up	1.45983
Slc30a2	solute carrier family 30 (zinc transporter), member 2"		A_42_P663722	0.00825565	down	1.32097	chr5:153096970-153097029
		AA996836 UI-R-C0-hg-e-02-0-UI.s1 UI-R-C0 Rattus norvegicus cDNA clone UI-R-C0-hg-e-02-0-UI 3', mRNA sequence [AA996836]	A_44_P265473	0.0312725	down	1.17572	Rn.8901
Cdyl	chromodomain protein, Y chromosome-like"		A_42_P569063	0.0342454	up	1.24246	chr17:35290311-35290255
Hfe	hemochromatosis	Rattus norvegicus hemochromatosis (Hfe), mRNA [NM_053301]	A_44_P172140	0.0181207	up	1.25998	Rn.42931
		BQ190173 UI-R-DM1-cke-i-24-0-UI.s2 UI-R-DM1 Rattus norvegicus cDNA clone UI-R-DM1-cke-i-24-0-UI 3', mRNA sequence [BQ190173]	A_44_P324582	0.0466743	down	1.43184	Rn.32641
		CA340359 NISC_lz02f09.y1 NCI_CGAP_Pr33 Rattus norvegicus cDNA clone IMAGE:5623433 5', mRNA sequence [CA340359]	A_44_P177182	0.0175096	down	1.23997	Rn.105388
		XM_719961 metal ion transporter {Plasmodium yoelii yoelii str. 17XNL} (exp=-1; wgp=0; cg=0), partial (3%) [TC619628]	A_44_P577263	0.0371499	up	1.46195
Olr1409	olfactory receptor 1409	Rattus norvegicus olfactory receptor 1409 (Olr1409), mRNA [NM_001000004]	A_44_P278539	0.0449327	down	1.18331	Rn.142161
Ankrd50	ankyrin repeat domain 50	PREDICTED: Rattus norvegicus ankyrin repeat domain 50 (predicted) (Ankrd50_predicted), mRNA [XM_215553]	A_44_P930629	0.0145231	up	1.22785	Rn.7482
		AI175566 EST219121 Normalized rat ovary, Bento Soares Rattus sp. cDNA clone ROVBC07 3' end, mRNA sequence [AI175566]	A_44_P134711	0.0466288	down	1.17085	Rn.29901
Fgf17	fibroblast growth factor 17	Rattus norvegicus fibroblast growth factor 17 (Fgf17), mRNA [NM_019198]	A_43_P11972	0.026314	down	1.54237	Rn.44353
Rbp7	retinol binding protein 7, cellular"		A_44_P1040207	0.00380265	up	1.6362	chr5:166531506-166530940
		Cellular tumor antigen p53 (Tumor suppressor p53). [Source:UniProtKB/Swiss-Prot;Acc:P10361] [ENSRNOT00000014471]	A_44_P456752	0.0108513	down	1.08185
Adra2c	adrenergic, alpha-2C-, receptor"		A_42_P583113	0.0491993	up	1.12155	chr14:81108076-81108017
		UI-R-BO1-ajv-d-06-0-UI.s1 UI-R-BO1 Rattus norvegicus cDNA clone UI-R-BO1-ajv-d-06-0-UI 3', mRNA sequence [AW527535]	A_44_P179608	0.0119955	up	1.24312	Rn.169624
Mfn1	mitofusin 1	Rattus norvegicus mitofusin 1 (Mfn1), nuclear gene encoding mitochondrial protein, mRNA [NM_138976]	A_44_P339806	0.0430792	up	1.20133	Rn.160939
		BM384257 UI-R-DZ0-cks-i-07-0-UI.s1 NCI_CGAP_DZ0 Rattus norvegicus cDNA clone IMAGE:7338801 3', mRNA sequence [BM384257]	A_44_P413671	0.0392921	up	1.75806	Rn.852
Ccdc7	coiled-coil domain containing 7	Rattus norvegicus coiled-coil domain containing 7 (Ccdc7), mRNA [NM_001011561]	A_44_P759874	0.00531101	down	1.24089	Rn.122954
		EST239695 Normalized rat kidney, Bento Soares Rattus sp. cDNA clone RKIES95 3' end, mRNA sequence [AI411401]	A_44_P205192	0.049449	down	1.03263	Rn.25033
Cyp2b1	cytochrome P450, family 2, subfamily b, polypeptide 1"		A_44_P191762	0.000869788	up	1.14538	chr1:81282851-81285942
Nudt22	nudix (nucleoside diphosphate linked moiety X)-type motif 22	Rattus norvegicus nudix (nucleoside diphosphate linked moiety X)-type motif 22 (Nudt22), mRNA [NM_199090]	A_43_P16786	0.0483175	down	1.13923	Rn.1934
Tmprss5	transmembrane protease, serine 5"		A_44_P526908	0.031452	up	1.1074	chr8:52379210-52379269
Nmnat2	nicotinamide nucleotide adenylyltransferase 2	Rattus norvegicus nicotinamide nucleotide adenylyltransferase 2 (Nmnat2), mRNA [NM_001048042]	A_43_P18398	0.0163131	up	1.09573	Rn.145458
Dgkz	diacylglycerol kinase zeta	Rattus norvegicus diacylglycerol kinase zeta (Dgkz), mRNA [NM_031143]	A_43_P12540	0.0362894	down	1.1052	Rn.11208
Sesn3	sestrin 3	Rattus norvegicus sestrin 3 (Sesn3), mRNA [NM_001108125]	A_44_P437327	0.00807818	up	1.22039	Rn.136987
RGD1561185	similar to putative protein kinase	PREDICTED: Rattus norvegicus similar to KP78b CG17216-PA (LOC367461), mRNA [XR_006543]	A_44_P974207	0.0214809	down	1.28557	Rn.198062
Tfrc	transferrin receptor	Transferrin receptor protein 1 (TfR1) (TR) (TfR) (Trfr) (CD71 antigen) (Fragment). [Source:UniProtKB/Swiss-Prot;Acc:Q99376] [ENSRNOT00000002407]	A_44_P313767	0.0426295	down	1.2346	Rn.98672
		Rattus norvegicus similar to hypothetical protein FLJ11151 (LOC363533), mRNA [XM_343852]	A_44_P373188	0.0339204	down	1.09727
		AA963484 UI-R-E1-gi-e-01-0-UI.s1 UI-R-E1 Rattus norvegicus cDNA clone UI-R-E1-gi-e-01-0-UI 3', mRNA sequence [AA963484]	A_44_P500767	0.0158363	down	1.38361	Rn.107335
		similar to splicing factor, arginine/serine-rich 1 (ASF/SF2) (LOC689890), mRNA [Source:RefSeq_dna;Acc:NM_001109552] [ENSRNOT00000013387]	A_42_P673119	0.0195703	up	1.18755	Rn.198892
Tnnt1	troponin T type 1 (skeletal, slow)"		A_44_P383874	0.0272323	up	1.24305	chr1:68043195-68043354
Cpsf3l	cleavage and polyadenylation specific factor 3-like	Rattus norvegicus cleavage and polyadenylation specific factor 3-like (Cpsf3l), mRNA [NM_001033892]	A_43_P21003	0.0483701	up	1.29947	Rn.98615
		AI176647 EST220239 Normalized rat ovary, Bento Soares Rattus sp. cDNA clone ROVBV09 3' end, mRNA sequence [AI176647]	A_44_P118054	0.000568309	down	1.11063	Rn.18572
Hepacam2	HEPACAM family member 2	Rattus norvegicus HEPACAM family member 2 (Hepacam2), mRNA [NM_001106580]	A_44_P161589	0.00435176	down	1.52091	Rn.66067
Mid1ip1	MID1 interacting protein 1 (gastrulation specific G12 homolog (zebrafish))	Rattus norvegicus MID1 interacting protein 1 (gastrulation specific G12 homolog (zebrafish)) (Mid1ip1), mRNA [NM_206950]	A_44_P238204	0.0383473	up	1.12623	Rn.8267
Mrpl50	mitochondrial ribosomal protein L50	Rattus norvegicus mitochondrial ribosomal protein L50 (Mrpl50), nuclear gene encoding mitochondrial protein, mRNA [NM_001108665]	A_44_P117072	0.00972308	up	1.17275	Rn.1787
		BF285323 EST449914 Rat Gene Index, normalized rat, Rattus norvegicus cDNA Rattus norvegicus cDNA clone RGIFD51 3' sequence, mRNA sequence [BF285323]	A_44_P343064	0.0310353	down	1.26891	Rn.144754
Magea10	melanoma antigen family A, 10"		A_44_P323969	0.0469183	down	1.06866	chrX:158161592-158161651
			A_44_P836881	0.0341726	down	1.15544
		AA899132 UI-R-E0-cx-c-01-0-UI.s1 UI-R-E0 Rattus norvegicus cDNA clone UI-R-E0-cx-c-01-0-UI 3' similar to gi [AA899132]	A_44_P814913	0.0110201	down	1.24258	Rn.114086
			A_44_P948776	0.0285581	up	1.46941
Llgl2	lethal giant larvae homolog 2 (Drosophila)	Rattus norvegicus lethal giant larvae homolog 2 (Drosophila) (Llgl2), mRNA [NM_001127549]	A_44_P615345	0.0430938	down	1.07889	Rn.198904
Gfra2	GDNF family receptor alpha 2	Rattus norvegicus GDNF family receptor alpha 2 (Gfra2), mRNA [NM_012750]	A_42_P791436	0.0374944	up	1.44541	Rn.90137
Tshz1	teashirt zinc finger homeobox 1	PREDICTED: Rattus norvegicus serologically defined colon cancer antigen 33 (predicted) (Sdccag33_predicted), mRNA [XM_225688]	A_44_P526795	0.0265944	up	1.4525	Rn.205514
Vdac1	voltage-dependent anion channel 1	Rattus norvegicus voltage-dependent anion channel 1 (Vdac1), mRNA [NM_031353]	A_44_P505885	0.048188	up	1.64672	Rn.54594
		AI232793 EST229481 Normalized rat kidney, Bento Soares Rattus sp. cDNA clone RKICG64 3' end, mRNA sequence [AI232793]	A_44_P165454	0.0273486	down	1.30097	Rn.113924
Epb4.1l1	erythrocyte protein band 4.1-like 1	Rattus norvegicus erythrocyte protein band 4.1-like 1 (Epb4.1l1), transcript variant 2, mRNA [NM_021681]	A_44_P305135	0.000261148	up	1.29822	Rn.20361
			A_44_P610159	0.0273886	up	1.9686
Txnl4b	thioredoxin-like 4B	Rattus norvegicus thioredoxin-like 4B (Txnl4b), mRNA [NM_001013891]	A_44_P210907	0.0316904	up	1.27756	Rn.7305
Oas1b	2-5 oligoadenylate synthetase 1B	2-5 oligoadenylate synthetase 1B [Source:RefSeq_peptide;Acc:NP_653353] [ENSRNOT00000001853]	A_44_P332744	0.025872	up	1.7207	Rn.14530
Braf	v-raf murine sarcoma viral oncogene homolog B1	V-raf murine sarcoma viral oncogene B1-like protein (Fragment). [Source:UniProtKB/TrEMBL;Acc:Q99MC6] [ENSRNOT00000014604]	A_43_P16155	0.0177268	up	1.06168	Rn.205813
Fam164a	family with sequence similarity 164, member A"		A_44_P428997	0.0203553	up	1.31913	chr2:96410190-96410131
Rab5c	RAB5C, member RAS oncogene family"		A_44_P187374	0.0255797	up	1.13274	chr10:89653222-89653163
Ptx3	pentraxin related gene	Rattus norvegicus pentraxin related gene (Ptx3), mRNA [NM_001109536]	A_44_P140244	0.0223922	up	1.14327	Rn.218702
		Q59FT8_HUMAN (Q59FT8) Zinc finger protein 419 variant (Fragment), partial (10%) [TC627546]	A_44_P778114	0.0290078	down	1.10564
		AMGNNUC:NRHY5-00351-C1-A W Rat hypothalamus (10471) Rattus norvegicus cDNA clone nrhy5-00351-c1 5', mRNA sequence [CB583330]	A_44_P854908	0.0223213	up	1.33517	Rn.46057
Olr1237	olfactory receptor 1237	Rattus norvegicus olfactory receptor 1237 (Olr1237), mRNA [NM_001000963]	A_44_P404906	0.00149709	up	1.1011	Rn.143533
			A_44_P534479	0.0336613	down	1.5399
		AGENCOURT_109871768 NIH_MGC_418 Rattus norvegicus cDNA clone IMAGE:9023112 5', mRNA sequence [EV764610]	A_44_P791596	0.0204938	up	1.01907	Rn.30788
Mstn	myostatin	Rattus norvegicus myostatin (Mstn), mRNA [NM_019151]	A_43_P11952	0.0150629	up	1.1723	Rn.44460
			A_44_P701371	0.0405046	up	1.28174
		BI274118 UI-R-CW0-bwf-b-09-0-UI.s1 UI-R-CW0 Rattus norvegicus cDNA clone UI-R-CW0-bwf-b-09-0-UI 3', mRNA sequence [BI274118]	A_44_P500295	0.0143072	down	1.17554	Rn.11495
RGD1308114	similar to cDNA sequence AF397014	Rattus norvegicus similar to cDNA sequence AF397014 (RGD1308114), mRNA [NM_001014146]	A_44_P468728	0.00794286	up	2.40574	Rn.35332
Cdk7	cyclin-dependent kinase 7	Cell division protein kinase 7 (EC 2.7.11.22) (EC 2.7.11.23) (CDK- activating kinase) (CAK) (TFIIH basal transcription factor complex kinase subunit) (39 protein kinase) (P39 Mo15) (Fragment). [Source:UniProtKB/Swiss-Prot;Acc:P51952] [ENSRNOT00000025026]	A_43_P15773	0.0230961	down	1.12529	Rn.98896
		EST197493 Normalized rat placenta, Bento Soares Rattus sp. cDNA clone RPLAI47 3' end, mRNA sequence [AA893690]	A_44_P167626	0.00792627	down	1.23903	Rn.164215
		BF409064 UI-R-BT1-bkl-e-12-0-UI.s1 UI-R-BT1 Rattus norvegicus cDNA clone UI-R-BT1-bkl-e-12-0-UI 3', mRNA sequence [BF409064]	A_44_P878861	0.0321713	up	1.12263	Rn.47032
		Rattus norvegicus similar to RIKEN cDNA 1700049E17 (LOC364261), mRNA [XM_344304]	A_44_P365719	0.00385406	down	1.37464
		RATLNKP5 link protein (0.8 kd) {Rattus sp.} (exp=-1; wgp=0; cg=0), partial (68%) [TC584043]	A_44_P652925	0.00386575	up	1.158
Ptma	prothymosin alpha	Rattus norvegicus prothymosin alpha (Ptma), mRNA [NM_021740]	A_42_P486763	0.0382354	up	1.16046	Rn.817
Il10rb	interleukin 10 receptor, beta"		A_43_P20485	0.00760355	down	1.06184	chr11:31381462-31384035
Crebbp	CREB binding protein	Rattus norvegicus CREB binding protein (Crebbp), mRNA [NM_133381]	A_43_P13167	0.00963832	up	1.19953	Rn.108128
		BF389308 UI-R-BS2-bdm-c-06-0-UI.s1 UI-R-BS2 Rattus norvegicus cDNA clone UI-R-BS2-bdm-c-06-0-UI 3', mRNA sequence [BF389308]	A_44_P252165	0.044458	up	1.11954	Rn.147729
Galntl4	UDP-N-acetyl-alpha-D-galactosamine:polypeptide N-acetylgalactosaminyltransferase-like 4	Rattus norvegicus UDP-N-acetyl-alpha-D-galactosamine:polypeptide N-acetylgalactosaminyltransferase-like 4 (Galntl4), mRNA [NM_001079884]	A_44_P276587	0.0439332	down	1.25438	Rn.212131
		GPTC2_MOUSE (Q7TQC7) G patch domain-containing protein 2, partial (33%) [TC625167]	A_44_P853410	0.0196922	up	1.23254
Snx4	sorting nexin 4	Rattus norvegicus sorting nexin 4 (Snx4), mRNA [NM_001127550]	A_44_P1034823	0.0430002	up	1.02556	Rn.2645
		AW434670 UI-R-BJ0p-afi-h-01-0-UI.s1 UI-R-BJ0p Rattus norvegicus cDNA clone UI-R-BJ0p-afi-h-01-0-UI 3', mRNA sequence [AW434670]	A_44_P101713	0.0476304	down	1.07928	Rn.27588
Spock2	sparc/osteonectin, cwcv and kazal-like domains proteoglycan 2"		A_44_P152177	0.0374197	down	1.26495	chr20:27421784-27421842
			A_44_P250714	0.00610094	down	1.29087
		AW527799 UI-R-BT1-ajy-h-07-0-UI.s1 UI-R-BT1 Rattus norvegicus cDNA clone UI-R-BT1-ajy-h-07-0-UI 3', mRNA sequence [AW527799]	A_44_P503070	0.00889105	up	1.23003	Rn.206503
RGD1562551	similar to C20orf82	Rattus norvegicus similar to C20orf82 (RGD1562551), mRNA [NM_001134552]	A_44_P869362	0.0193504	up	2.34362	Rn.220532
RGD1305793	similar to hypothetical protein FLJ20154	Rattus norvegicus similar to hypothetical protein FLJ20154 (RGD1305793), mRNA [NM_001127484]	A_44_P129608	0.0273045	up	1.28563	Rn.105679
Ccdc45	coiled-coil domain containing 45	Rattus norvegicus coiled-coil domain containing 45 (Ccdc45), mRNA [NM_001013862]	A_44_P671768	0.0429421	up	1.16928	Rn.155284
		Cfh protein. [Source:UniProtKB/TrEMBL;Acc:Q5FVP9] [ENSRNOT00000036886]	A_44_P928726	0.00678812	down	1.50553	Rn.198418
		BF282598 EST447189 Rat Gene Index, normalized rat, Rattus norvegicus cDNA Rattus norvegicus cDNA clone RGIDQ58 3' sequence, mRNA sequence [BF282598]	A_44_P439778	0.0192783	up	1.43834	Rn.6917
Pcp2	Purkinje cell protein 2	Rattus norvegicus Purkinje cell protein 2 (Pcp2), mRNA [NM_001107116]	A_44_P269478	0.0335271	down	1.18141	Rn.162078
		RVL4037 Wackym-Soares normalized rat vestibular cDNA library Rattus norvegicus cDNA 5', mRNA sequence [DV714616]	A_44_P715788	0.0270337	up	3.74763	Rn.148648
Vps13a	vacuolar protein sorting 13 homolog A (S. cerevisiae)	Rattus norvegicus vacuolar protein sorting 13 homolog A (S. cerevisiae) (Vps13a), mRNA [NM_001100975]	A_43_P20190	0.0231612	up	1.36104	Rn.16931
		RVL4094 Wackym-Soares normalized rat vestibular cDNA library Rattus norvegicus cDNA 5', mRNA sequence [DV714667]	A_44_P577024	0.00742038	up	1.32872	Rn.146512
Gucy1a3	guanylate cyclase 1, soluble, alpha 3"		A_44_P320799	0.0131853	up	1.30569	chr2:173769084-173769025
RGD1566086	similar to gtf2ird2	PREDICTED: Rattus norvegicus similar to gtf2ird2 (predicted) (RGD1566086_predicted), mRNA [XM_341065]	A_42_P803908	0.0239834	down	1.22939	Rn.70273
		RVL18428 Wackym-Soares normalized rat vestibular cDNA library Rattus norvegicus cDNA 5', mRNA sequence [DV726161]	A_44_P654434	0.021005	down	1.08113	Rn.20751
Hrk	harakiri, BCL2 interacting protein (contains only BH3 domain)"		A_42_P768355	0.028903	up	1.23142	chr12:39520607-39520548
Maob	monoamine oxidase B	Rattus norvegicus monoamine oxidase B (Maob), nuclear gene encoding mitochondrial protein, mRNA [NM_013198]	A_43_P11752	0.0302397	up	1.20449	Rn.6656
Rbm39	RNA binding motif protein 39	Rattus norvegicus RNA binding motif protein 39 (Rbm39), mRNA [NM_001013207]	A_43_P10831	0.0454898	up	1.52195	Rn.8555
			A_44_P608425	0.0105475	up	1.04084
		Rattus norvegicus similar to M-BDG29 (LOC365018), mRNA [XM_344780]	A_43_P20418	0.0212638	down	1.09218	Rn.94784
Cytl1	cytokine like 1	Rattus norvegicus cytokine like 1 (Cytl1), mRNA [NM_001134604]	A_44_P898195	0.0315723	up	1.56961	Rn.8720
		EST240302 Normalized rat kidney, Bento Soares Rattus sp. cDNA clone RKIEJ46 3' end, mRNA sequence [AI412008]	A_44_P535138	0.0378742	up	1.0575	Rn.32754
Prrxl1	paired related homeobox protein-like 1	Rattus norvegicus paired related homeobox protein-like 1 (Prrxl1), mRNA [NM_145767]	A_44_P388709	0.0322234	up	1.16712	Rn.10189
		AW144796 EST291861 Normalized rat embryo, Bento Soares Rattus sp. cDNA clone RGICG10 5' end similar to CRM1 protein, mRNA sequence [AW144796]	A_44_P456191	0.0499443	up	1.45131	Rn.34087
		EST455275 Rat Gene Index, normalized rat, Rattus norvegicus cDNA Rattus norvegicus cDNA clone RGIHX88 3' sequence, mRNA sequence [BF290684]	A_44_P519443	0.0360864	down	1.59016	Rn.56130
		AGENCOURT_50138996 NCI_CGAP_Pr50 Rattus norvegicus cDNA clone IMAGE:7936282 5', mRNA sequence [DN931209]	A_44_P495260	0.00564568	up	1.33894	Rn.5854
LOC679958	similar to CG10806-PB, isoform B"		A_44_P1010260	0.0283512	up	1.34512	chr2:232819645-232819704
RGD1565712	similar to Hypothetical protein MGC59495	Rattus norvegicus similar to Hypothetical protein MGC59495 (RGD1565712), mRNA [NM_001127579]	A_44_P499011	0.0200263	up	1.20575	Rn.171046
Kremen2	kringle containing transmembrane protein 2	Rattus norvegicus similar to Kremen2 protein (LOC287102), mRNA [XM_220206]	A_44_P293374	0.014593	down	1.16206
Krtap4-7	keratin associated protein 4-7	PREDICTED: Rattus norvegicus similar to keratin associated protein 4-7 (LOC680195), mRNA [XM_001056094]	A_44_P728660	0.0108402	down	1.1996
		PREDICTED: Rattus norvegicus hypothetical protein LOC687062 (LOC687062), mRNA [XM_001076927]	A_44_P396347	0.0452707	down	1.68822	Rn.195691
		AW917383 EST348687 Rat gene index, normalized rat, norvegicus, Bento Soares Rattus norvegicus cDNA clone RGIED17 5' end, mRNA sequence [AW917383]	A_44_P820780	0.027301	down	1.27924	Rn.190463
		AA818970 UI-R-A0-as-g-05-0-UI.s1 UI-R-A0 Rattus norvegicus cDNA clone UI-R-A0-as-g-05-0-UI 3' similar to gb [AA818970]	A_44_P529055	0.0247527	up	1.15959	Rn.11412
		RVL2906 Wackym-Soares normalized rat vestibular cDNA library Rattus norvegicus cDNA 5', mRNA sequence [DV713946]	A_44_P450786	0.0319152	up	1.43474	Rn.204040
rCG_44068	forkhead box C1	PREDICTED: Rattus norvegicus similar to forkhead box C1 (LOC364706), mRNA [XR_008386]	A_44_P353778	0.0498425	up	1.26001	Rn.11816
RGD1311084	similar to 1700113K14Rik protein	Rattus norvegicus similar to 1700113K14Rik protein (LOC311852), mRNA [XM_231131]	A_43_P17903	0.00831105	up	1.06667
			A_44_P761994	0.0126854	up	1.16995
Serpine2	serine (or cysteine) peptidase inhibitor, clade E, member 2"		A_44_P438863	0.0398355	up	1.6491	chr9:79091921-79091862
		Rattus norvegicus similar to Myosin IXb (Unconventional myosin-9b) (LOC367372), mRNA [XM_346110]	A_44_P276899	0.0383528	down	1.91969
			A_43_P14503	0.0367896	down	1.1697
Pla2r1	phospholipase A2 receptor 1	PREDICTED: Rattus norvegicus mannose receptor, C type 2 (predicted) (Mrc2_predicted), mRNA [XM_215737]	A_43_P18474	0.0365083	up	1.1593	Rn.11694
Fhl3	four and a half LIM domains 3	Rattus norvegicus four and a half LIM domains 3 (Fhl3), mRNA [NM_001107979]	A_44_P363736	0.0109564	down	1.05735	Rn.100732
			A_44_P780874	0.00659821	up	1.06305
RGD1565344	similar to zinc finger, matrin type 1"		A_42_P603670	0.0387839	up	1.36315	chrX:122455704-122455645
		BG666882 DRACPD08 Rat DRG Library Rattus norvegicus cDNA clone DRACPD08 5', mRNA sequence [BG666882]	A_44_P322968	0.0100047	up	1.26378	Rn.164650
RGD1562629	similar to neurobeachin	PREDICTED: Rattus norvegicus similar to neurobeachin (predicted) (RGD1562629_predicted), mRNA [XM_001059612]	A_44_P1020311	0.00446438	up	1.43866	Rn.9376
Mst4	serine/threonine protein kinase MST4	Rattus norvegicus similar to serine/threonine protein kinase MASK; STE20-like kinase MST4 (LOC317589), mRNA [XM_229143]	A_44_P478360	0.01405	down	1.43241	Rn.162348
Trim63	tripartite motif-containing 63	Rattus norvegicus tripartite motif-containing 63 (Trim63), mRNA [NM_080903]	A_42_P667296	0.0255145	up	1.40777	Rn.40636
		Rattus norvegicus similar to piggyBac transposable element derived 2 (LOC287304), mRNA [XM_220453]	A_44_P382585	0.0168841	up	1.08798
		AW917502 EST348806 Rat gene index, normalized rat, norvegicus, Bento Soares Rattus norvegicus cDNA clone RGIEE62 5' end, mRNA sequence [AW917502]	A_44_P232508	0.01569	down	1.05308	Rn.203255
		UI-R-C1-kx-h-12-0-UI.r1 UI-R-C1 Rattus norvegicus cDNA clone UI-R-C1-kx-h-12-0-UI 5', mRNA sequence [BF546389]	A_44_P747942	0.00579084	down	1.28295	Rn.150435
		AA925846 UI-R-A1-et-d-10-0-UI.s1 UI-R-A1 Rattus norvegicus cDNA clone UI-R-A1-et-d-10-0-UI 3' similar to gi [AA925846]	A_44_P158073	0.00914736	down	1.12497	Rn.89639
		Rattus norvegicus similar to RIKEN cDNA 1500034J20 (LOC362183), mRNA [XM_342482]	A_44_P492279	0.00161715	down	1.06519
RGD1310712	similar to EMSY protein	PREDICTED: Rattus norvegicus similar to EMSY protein (predicted) (RGD1310712_predicted), mRNA [XM_001064849]	A_44_P206002	0.00451029	down	1.19205	Rn.200867
RGD1563689	similar to KIAA0853 protein	PREDICTED: Rattus norvegicus similar to KIAA0853 protein (predicted) (RGD1307729_predicted), mRNA [XM_224295]	A_42_P622746	0.000113456	up	1.37385	Rn.100827
			A_44_P675125	0.0239425	up	1.43224
Snrpb2	small nuclear ribonucleoprotein polypeptide B''	Rattus norvegicus small nuclear ribonucleoprotein polypeptide B'' (Snrpb2), mRNA [NM_001108592]	A_42_P815372	0.0262808	up	1.20416	Rn.7712
B3galnt1	beta-1,3-N-acetylgalactosaminyltransferase 1"		A_44_P536676	0.014846	up	1.46898	chr2:159671987-159671928
Bcas3	breast carcinoma amplified sequence 3	PREDICTED: Rattus norvegicus similar to Breast carcinoma amplified sequence 3 homolog (K20D4) (predicted) (RGD1560788_predicted), mRNA [XM_343952]	A_44_P239271	0.0130082	down	1.10755	Rn.203379
		AI599979 EST251682 Normalized rat embryo, Bento Soares Rattus sp. cDNA clone REMEJ35 3' end, mRNA sequence [AI599979]	A_44_P268345	0.00977774	down	1.24981	Rn.260
		CB547154 AMGNNUC:SRPB2-00137-E4-A srpb2 (10220) Rattus norvegicus cDNA clone srpb2-00137-e4 5', mRNA sequence [CB547154]	A_44_P223305	0.0436414	down	1.08523	Rn.51026
Eif4g2	eukaryotic translation initiation factor 4, gamma 2"		A_44_P594455	0.0358998	down	1.06402	chr1:168833582-168833523
		AW917391 EST348695 Rat gene index, normalized rat, norvegicus, Bento Soares Rattus norvegicus cDNA clone RGIED27 5' end, mRNA sequence [AW917391]	A_44_P252390	0.0411055	down	1.18159	Rn.111929
Fgfbp3	fibroblast growth factor binding protein 3	Rattus norvegicus fibroblast growth factor binding protein 3 (Fgfbp3), mRNA [NM_001109165]	A_42_P555426	0.0307133	up	1.1515	Rn.166095
Ttc18	tetratricopeptide repeat domain 18	Rattus norvegicus similar to tetratricopeptide repeat-containing protein (LOC361006), mRNA [XM_341281]	A_44_P241168	0.012616	up	1.08359	Rn.219911
Wdr19	WD repeat domain 19	PREDICTED: Rattus norvegicus WD repeat domain 19 (predicted) (Wdr19_predicted), mRNA [XM_223412]	A_44_P520371	0.0492023	up	1.15491	Rn.18220
		BM388719 UI-R-DZ0-ckm-j-20-0-UI.s1 NCI_CGAP_DZ0 Rattus norvegicus cDNA clone IMAGE:7337686 3', mRNA sequence [BM388719]	A_44_P453870	0.0198349	up	1.18178	Rn.129121
		UI-R-A1-ey-h-10-0-UI.s1 UI-R-A1 Rattus norvegicus cDNA clone UI-R-A1-ey-h-10-0-UI 3', mRNA sequence [AA955077]	A_43_P13805	0.0206773	down	1.09313	Rn.8810
Galntl5	UDP-N-acetyl-alpha-D-galactosamine:polypeptide N-acetylgalactosaminyltransferase-like 5	Rattus norvegicus UDP-N-acetyl-alpha-D-galactosamine:polypeptide N-acetylgalactosaminyltransferase-like 5 (Galntl5), mRNA [NM_001025148]	A_44_P590256	0.00132391	up	1.70279	Rn.215017
Lrp6	low density lipoprotein receptor-related protein 6	low density lipoprotein receptor-related protein 6 [Source:RefSeq_peptide;Acc:NP_001101362] [ENSRNOT00000008486]	A_42_P460152	0.00283523	up	1.1298	Rn.218175
		WD51B_MOUSE (Q8BHD1) WD-repeat protein 51B, partial (10%) [TC630198]	A_43_P11260	0.0339609	down	1.2727
Grm3	glutamate receptor, metabotropic 3"		A_44_P146833	0.00686976	up	1.06702	chr4:20961612-20961671
Tigd4	tigger transposable element derived 4	PREDICTED: Rattus norvegicus tigger transposable element derived 4 (predicted) (Tigd4_predicted), mRNA [XM_001072194]	A_44_P173224	0.0263069	up	1.06122
Dbt	dihydrolipoamide branched chain transacylase E2	Rattus norvegicus dihydrolipoamide branched chain transacylase E2 (Dbt), nuclear gene encoding mitochondrial protein, mRNA [NM_053312]	A_43_P20065	0.0281312	up	1.169	Rn.198610
Lsm8	LSM8 homolog, U6 small nuclear RNA associated (S. cerevisiae)"		A_44_P446539	0.010986	down	1.08963	chr4:44717070-44717011
Olr1720	olfactory receptor 1720	Rattus norvegicus olfactory receptor 1720 (Olr1720), mRNA [NM_001001116]	A_44_P550263	0.0440608	down	1.12872	Rn.142671
Agtr2	angiotensin II receptor, type 2"		A_42_P470283	0.0177739	down	2.34996	chrUn:50646580-50646521
Xpa	xeroderma pigmentosum, complementation group A"		A_44_P1018246	0.0183276	up	1.37578	chr5:62734026-62733967
Seli	selenoprotein I	Rattus norvegicus selenoprotein I (Seli), mRNA [NM_001134754]	A_43_P18228	0.0126996	up	1.22827	Rn.64052
Als2	amyotrophic lateral sclerosis 2 (juvenile) homolog (human)	Rattus norvegicus amyotrophic lateral sclerosis 2 (juvenile) homolog (human) (Als2), mRNA [NM_001013413]	A_44_P403444	0.00390003	down	1.25705	Rn.6408
Olr6	olfactory receptor 6	Rattus norvegicus olfactory receptor 6 (Olr6), mRNA [NM_001000539]	A_44_P196316	0.00383418	down	1.08972	Rn.142003
Fhl1	four and a half LIM domains 1	Rattus norvegicus four and a half LIM domains 1 (Fhl1), transcript variant 2, mRNA [NM_145669]	A_44_P1008753	0.00640032	up	1.5675	Rn.54261
			A_44_P557716	0.0299655	down	1.45908	Rn.198262
			A_44_P492533	0.0153852	down	1.27032
Nphp3	nephronophthisis 3 (adolescent)	PREDICTED: Rattus norvegicus similar to nephrocystin 3 (predicted) (RGD1563856_predicted), mRNA [XM_343461]	A_44_P108017	0.00345654	down	1.14123	Rn.104126
C1d	nuclear DNA binding protein	Rattus norvegicus nuclear DNA binding protein (C1d), mRNA [NM_001106021]	A_43_P14774	0.00391279	up	1.14111	Rn.102095
Serpinf2	serine (or cysteine) peptidase inhibitor, clade F, member 2"		A_44_P176025	0.0356282	up	1.0568	chr10:62749013-62748954
		BF391513 UI-R-CA1-bcx-h-08-0-UI.s1 UI-R-CA1 Rattus norvegicus cDNA clone UI-R-CA1-bcx-h-08-0-UI 3', mRNA sequence [BF391513]	A_44_P1050395	0.00596461	down	1.05678	Rn.95841
Aff4	AF4/FMR2 family, member 4"		A_44_P684922	0.00730987	up	1.11233	chr10:38877762-38877821
		BG376309 UI-R-CT0-buo-a-03-0-UI.s1 UI-R-CT0 Rattus norvegicus cDNA clone UI-R-CT0-buo-a-03-0-UI 3', mRNA sequence [BG376309]	A_44_P530951	0.0312368	down	1.09056	Rn.6873
Prlhr	prolactin releasing hormone receptor	Rattus norvegicus prolactin releasing hormone receptor (Prlhr), mRNA [NM_139193]	A_44_P257254	0.0280788	up	1.09092	Rn.138127
		UI-R-A1-eh-d-07-0-UI.s1 UI-R-A1 Rattus norvegicus cDNA clone UI-R-A1-eh-d-07-0-UI 3', mRNA sequence [AA925007]	A_44_P403511	0.0390088	down	1.30064	Rn.120645
Ddx60	DEAD (Asp-Glu-Ala-Asp) box polypeptide 60	Rattus norvegicus similar to Hypothetical protein FLJ20035 (LOC306409), mRNA [XM_224795]	A_44_P398424	0.0126232	up	1.3023	Rn.144123
		Rattus norvegicus similar to 60S ribosomal protein L23a (LOC365774), mRNA [XM_345203]	A_44_P128500	0.0269206	up	1.16802
Agt	angiotensinogen (serpin peptidase inhibitor, clade A, member 8)"		A_43_P13272	0.020317	down	3.36438	chr19:54738924-54738865
		Shultzomica03422 Rat lung airway and parenchyma cDNA libraries Rattus norvegicus cDNA clone Contig3021 5', mRNA sequence [CF110171]	A_44_P165044	0.041458	up	1.56361	Rn.4018
Dusp10	dual specificity phosphatase 10	Rattus norvegicus dual specificity phosphatase 10 (Dusp10), mRNA [XM_223030]	A_44_P264892	0.0252786	down	1.08295
		LRRGT00029. [Source:UniProtKB/TrEMBL;Acc:Q6TXH0] [ENSRNOT00000044258]	A_44_P468308	0.0489716	down	1.10861
Abcb6	ATP-binding cassette, sub-family B (MDR/TAP), member 6"		A_44_P446882	0.0054832	up	1.25189	chr9:74455369-74455227
Ube2g2	ubiquitin-conjugating enzyme E2G 2	Rattus norvegicus ubiquitin-conjugating enzyme E2G 2 (Ube2g2), mRNA [NM_001106380]	A_44_P1023515	0.0393495	up	1.57293	Rn.139603
		RVL19817 Wackym-Soares normalized rat vestibular cDNA library Rattus norvegicus cDNA 5', mRNA sequence [DV727337]	A_44_P411173	0.0219141	up	1.24633	Rn.17224
		Rattus norvegicus similar to 2510002A14Rik protein (LOC364144), mRNA [XM_344235]	A_44_P180294	0.0475372	up	1.45701
		Q420T9_DESHA (Q420T9) Cytoplasmic chaperone TorD, partial (7%) [TC608012]	A_44_P746887	0.00855204	up	1.50092
		AGENCOURT_111917417 NIH_MGC_420 Rattus norvegicus cDNA clone IMAGE:9034947 5', mRNA sequence [EV763944]	A_44_P632663	0.00271596	up	1.14574	Rn.14791
			A_44_P950713	0.0200353	up	1.21645
		PREDICTED: Rattus norvegicus similar to cytoplasmic beta-actin (LOC302827), mRNA [XR_006563]	A_44_P211015	0.041928	up	1.20541	Rn.196812
Ifitm3	interferon induced transmembrane protein 3	Rattus norvegicus interferon induced transmembrane protein 3 (Ifitm3), mRNA [NM_001136124]	A_44_P484889	0.0415346	up	1.12434	Rn.145191
Leprel2	leprecan-like 2	leprecan-like 2 [Source:RefSeq_peptide;Acc:NP_001100090] [ENSRNOT00000021578]	A_44_P539111	0.000886125	down	2.2164
		BF556399 UI-R-A1-ep-e-10-0-UI.r1 UI-R-A1 Rattus norvegicus cDNA clone UI-R-A1-ep-e-10-0-UI 5', mRNA sequence [BF556399]	A_43_P14615	0.00303689	up	1.60396	Rn.15594
		RVL22332 Wackym-Soares normalized rat vestibular cDNA library Rattus norvegicus cDNA 5', mRNA sequence [DY471166]	A_44_P420343	0.0140256	up	1.40563	Rn.169131
		AI176460 EST220045 Normalized rat ovary, Bento Soares Rattus sp. cDNA clone ROVBS08 3' end, mRNA sequence [AI176460]	A_44_P334157	0.0246537	down	1.2827
Tbc1d10c	TBC1 domain family, member 10C"		A_44_P367958	0.0314315	down	1.10696	chr1:206771745-206771686
Atp11b	ATPase, class VI, type 11B"		A_43_P17575	0.0150241	up	1.0526	chr2:122284713-122286047
		AW917571 EST348875 Rat gene index, normalized rat, norvegicus, Bento Soares Rattus norvegicus cDNA clone RGIEF45 5' end, mRNA sequence [AW917571]	A_42_P665381	0.0226712	up	1.14913	Rn.216485
		CA506853 UI-R-FJ0-cqc-h-09-0-UI.s1 UI-R-FJ0 Rattus norvegicus cDNA clone UI-R-FJ0-cqc-h-09-0-UI 3', mRNA sequence [CA506853]	A_44_P223009	0.0223829	down	1.12216	Rn.66392
RGD1308154	similar to CG11388-PA	CB546481 AMGNNUC:NRHY5-00202-E6-A W Rat hypothalamus (10471) Rattus norvegicus cDNA clone nrhy5-00202-e6 5', mRNA sequence [CB546481]	A_44_P429483	0.00463008	down	1.59557	Rn.17212
Nsg1	neuron specific gene family member 1	Rattus norvegicus neuron specific gene family member 1 (Nsg1), mRNA [NM_024128]	A_44_P1049827	0.0314559	down	1.81729	Rn.2865
Cox18	COX18 cytochrome c oxidase assembly homolog (S. cerevisiae)	Rattus norvegicus COX18 cytochrome c oxidase assembly homolog (S. cerevisiae) (Cox18), mRNA [NM_001106000]	A_44_P991949	0.0442258	up	1.57924	Rn.24568
Gpr64	G protein-coupled receptor 64	Rattus norvegicus G protein-coupled receptor 64 (Gpr64), mRNA [NM_181366]	A_44_P397825	0.0194606	up	1.73903	Rn.57243
Sec23a	Sec23 homolog A (S. cerevisiae)	SEC23A (S. cerevisiae) (predicted) [Source:RefSeq_peptide;Acc:NP_001099202] [ENSRNOT00000006369]	A_42_P603716	0.00896213	down	1.22632	Rn.203115
		Rattus norvegicus similar to chromosome 11 open reading frame 11 (LOC309207), mRNA [XM_219575]	A_43_P19506	0.00712385	down	1.17744	Rn.124941
		AA891734 EST195537 Normalized rat kidney, Bento Soares Rattus sp. cDNA clone RKIAG13 3' end, mRNA sequence [AA891734]	A_44_P261768	0.0111746	down	1.10183	Rn.54151
		AA858573 UI-R-E0-bq-f-06-0-UI.s1 UI-R-E0 Rattus norvegicus cDNA clone UI-R-E0-bq-f-06-0-UI 3' similar to gb [AA858573]	A_44_P583727	0.0406527	down	1.10917	Rn.106183
			A_44_P668927	0.0422346	up	1.35351
Prp2	proline rich protein 2	Rattus norvegicus proline rich protein 2 (Prp2), mRNA [NM_001013211]	A_44_P318572	0.0425843	down	1.3435	Rn.143067
Olr748	olfactory receptor 748	Rattus norvegicus olfactory receptor 748 (Olr748), mRNA [NM_001000365]	A_44_P142049	0.0184362	up	1.16106	Rn.124761
		AA926180 UI-R-A1-ev-g-01-0-UI.s1 UI-R-A1 Rattus norvegicus cDNA clone UI-R-A1-ev-g-01-0-UI 3' similar to gi [AA926180]	A_44_P317742	0.0341462	down	1.65217	Rn.198951
		AI058866 UI-R-C1-kq-c-06-0-UI.s1 UI-R-C1 Rattus norvegicus cDNA clone UI-R-C1-kq-c-06-0-UI 3', mRNA sequence [AI058866]	A_44_P418349	0.01712	down	1.0487	Rn.10161
		AA925697 UI-R-A1-ec-b-02-0-UI.s1 UI-R-A1 Rattus norvegicus cDNA clone UI-R-A1-ec-b-02-0-UI 3', mRNA sequence [AA925697]	A_44_P502193	0.00436542	down	1.13108	Rn.50843
H2-Ea	histocompatibility 2, class II antigen E alpha"		A_44_P367688	0.000301674	up	1.20448	chr20:4638704-4638763
Cideb	cell death-inducing DNA fragmentation factor, alpha subunit-like effector B"		A_44_P1060096	0.0228609	down	1.04621	chr15:33917289-33917058
		AA945841 EST201340 Normalized rat lung, Bento Soares Rattus sp. cDNA clone RLUAU88 3' end, mRNA sequence [AA945841]	A_44_P242773	0.0240998	up	1.21177	Rn.65864
		AW920282 EST351586 Rat gene index, normalized rat, norvegicus, Bento Soares Rattus norvegicus cDNA clone RGIGT40 5' end, mRNA sequence [AW920282]	A_42_P572258	0.00597605	up	2.03856	Rn.9586
Plekhb2	pleckstrin homology domain containing, family B (evectins) member 2"		A_44_P180786	0.0405556	up	1.97808	chr9:33599829-33601175
			A_44_P163721	0.0184465	up	1.07719
Gba3	glucosidase, beta, acid 3 (cytosolic)"		A_42_P746647	0.0262307	up	1.20674	chr14:65548689-65468183
		AA899797 UI-R-E0-df-g-01-0-UI.s1 UI-R-E0 Rattus norvegicus cDNA clone UI-R-E0-df-g-01-0-UI 3', mRNA sequence [AA899797]	A_44_P140720	0.0114741	down	1.55122
H2-T23	histocompatibility 2, T region locus 23"		A_44_P128151	0.0105385	up	1.21078	chr20:2817942-2818001
RT1-Aw2	RT1 class Ib, locus Aw2"		A_44_P313652	0.0375836	up	1.22053	chr20_random:56583-56524
Tbk1	TANK-binding kinase 1	Rattus norvegicus TANK-binding kinase 1 (Tbk1), mRNA [NM_001106786]	A_43_P17992	0.0128019	up	1.31595	Rn.30683
		AA819521 UI-R-A0-bf-e-02-0-UI.s1 UI-R-A0 Rattus norvegicus cDNA clone UI-R-A0-bf-e-02-0-UI 3' similar to emb [AA819521]	A_44_P118342	0.0174587	down	1.19797	Rn.203028
			A_44_P576902	0.0161364	up	1.30408
Klf14	Kruppel-like factor 14	Rattus norvegicus Kruppel-like factor 14 (Klf14), mRNA [NM_001135094]	A_44_P768777	0.031724	up	1.11066	Rn.220701
Artn	artemin	Rattus norvegicus artemin (Artn), mRNA [NM_053397]	A_44_P163369	0.0406609	down	1.18308	Rn.154711
Psip1	PC4 and SFRS1 interacting protein 1	Rattus norvegicus PC4 and SFRS1 interacting protein 1, mRNA (cDNA clone MGC:105284 IMAGE:7317952), complete cds. [BC093606]	A_44_P510690	0.0129943	up	1.14478	Rn.93075
LOC502984	similar to 14-3-3 protein theta (14-3-3 protein tau)	PREDICTED: Rattus norvegicus similar to 14-3-3 protein theta (14-3-3 protein tau) (LOC502984), mRNA [XR_007582]	A_44_P698793	0.0349587	up	1.2462	Rn.197552
		AI013394 EST208069 Normalized rat spleen, Bento Soares Rattus sp. cDNA clone RSPBK42 3' end, mRNA sequence [AI013394]	A_44_P125136	0.0453887	down	1.12458	Rn.17364
Calcr	calcitonin receptor	Rattus norvegicus calcitonin receptor (Calcr), transcript variant 1, mRNA [NM_053816]	A_44_P158758	0.0207016	up	1.23042	Rn.10062
Myt1	myelin transcription factor 1	Rattus norvegicus myelin transcription factor 1 (Myt1), mRNA [NM_001108615]	A_44_P577899	0.0266381	down	1.21696	Rn.102945
		HPSE_BOVIN (Q9MYY0) Heparanase precursor [Contains: Heparanase 8 kDa subunit; Heparanase 50 kDa subunit] , partial (4%) [TC628391]	A_44_P748242	0.012356	down	1.17476
LOC499176	similar to glyceraldehyde-3-phosphate dehydrogenase (phosphorylating)-like	PREDICTED: Rattus norvegicus similar to glyceraldehyde-3-phosphate dehydrogenase (phosphorylating)-like (LOC499176), mRNA [XR_005983]	A_44_P728586	0.048613	up	1.17597	Rn.197966
		AMGNNUC:NRDG1-00150-F3-A nrdg1 (10855) Rattus norvegicus cDNA clone nrdg1-00150-f3 5', mRNA sequence [CB782652]	A_44_P856083	0.0342179	up	1.22282	Rn.171748
			A_43_P10773	0.0313339	up	1.59464
Apob48r	apolipoprotein B48 receptor	Rattus norvegicus apolipoprotein B48 receptor (Apob48r), mRNA [NM_001109154]	A_44_P194387	0.0373966	down	1.22235	Rn.107719
		Rattus norvegicus similar to immunoglobulin heavy chain VH-III region (LOC314514), mRNA [XM_234695]	A_44_P110300	0.0296908	down	1.27943
		AW254599 UI-R-BJ0-aep-c-06-0-UI.s1 UI-R-BJ0 Rattus norvegicus cDNA clone UI-R-BJ0-aep-c-06-0-UI 3', mRNA sequence [AW254599]	A_44_P460825	0.00913207	down	1.1451	Rn.12707
		Q4L2A2_RAT (Q4L2A2) CD99 (Fragment), partial (52%) [TC630617]	A_44_P961679	0.0245969	up	1.05945
Rnf217	ring finger protein 217	Rattus norvegicus ring finger protein 217 (Rnf217), mRNA [NM_001106204]	A_42_P733175	0.0175386	up	1.14548	Rn.9080
Ndst3	N-deacetylase/N-sulfotransferase (heparan glucosaminyl) 3	PREDICTED: Rattus norvegicus N-deacetylase/N-sulfotransferase (heparan glucosaminyl) 3 (predicted) (Ndst3_predicted), mRNA [XM_001075487]	A_44_P440868	0.0237072	down	1.12481
Olr982	olfactory receptor 982	Rattus norvegicus olfactory receptor 982 (Olr982), mRNA [NM_001000702]	A_44_P458909	0.00327081	up	1.01695	Rn.143373
			A_44_P715962	0.0188534	up	1.14956
		UI-R-BS1-axx-g-07-0-UI.s1 UI-R-BS1 Rattus norvegicus cDNA clone UI-R-BS1-axx-g-07-0-UI 3', mRNA sequence [BE115949]	A_44_P981999	0.0164067	up	1.05435	Rn.171453
		Rattus norvegicus cDNA clone IMAGE:7315186 [BC089968]	A_44_P562958	0.0267247	down	1.01883	Rn.220280
Pou6f1	POU class 6 homeobox 1	Rattus norvegicus POU class 6 homeobox 1 (Pou6f1), mRNA [NM_001105746]	A_44_P252657	0.013006	down	1.21801	Rn.44845
Golga2	golgi autoantigen, golgin subfamily a, 2"		A_42_P480082	0.0191605	up	1.07575	chr3:11434126-11434185
RGD1311429	similar to KIAA1267 protein	PREDICTED: Rattus norvegicus similar to KIAA1267 protein (predicted) (RGD1311429_predicted), mRNA [XR_006336]	A_44_P1024729	0.0377287	up	1.24503	Rn.24932
			A_44_P283869	0.0193459	down	1.21529
		Tmk {Mycoplasma gallisepticum R} (exp=-1; wgp=-1; cg=-1), partial (8%) [TC595219]	A_44_P808443	0.00511603	up	1.26618
		UI-R-DZ0-cmx-l-07-0-UI.s1 UI-R-DZ0 Rattus norvegicus cDNA clone UI-R-DZ0-cmx-l-07-0-UI 3', mRNA sequence [BQ190817]	A_44_P106817	0.0462023	down	1.25382	Rn.164409
Dnah12	dynein, axonemal, heavy polypeptide 12"		A_44_P529473	0.0176018	up	1.1796	chr16:2056439-2056498
Pter	phosphotriesterase related	Rattus norvegicus phosphotriesterase related (Pter), mRNA [NM_022224]	A_44_P728469	0.0396901	up	1.64643	Rn.44484
LOC299558	similar to Zinc finger protein 44 (Zinc finger protein KOX7) (Gonadotropin-inducible transcription repressor 2) (GIOT-2)	PREDICTED: Rattus norvegicus similar to Zinc finger protein 44 (Zinc finger protein KOX7) (Gonadotropin-inducible transcription repressor 2) (GIOT-2) (LOC299558), mRNA [XR_009217]	A_44_P145152	0.0116779	down	1.21184	Rn.215892
			A_44_P503768	0.0232817	down	1.21227
Fn1	fibronectin 1	Rattus norvegicus fibronectin 1 (Fn1), mRNA [NM_019143]	A_44_P210568	0.0257229	up	1.84575	Rn.1604
			A_44_P562426	0.0333451	up	1.13566
		AI145607 UI-R-BT0-ps-c-02-0-UI.s1 UI-R-BT0 Rattus norvegicus cDNA clone UI-R-BT0-ps-c-02-0-UI 3', mRNA sequence [AI145607]	A_44_P189097	0.0267075	down	1.15219	Rn.7484
RGD1565514	similar to RIKEN cDNA 4933424A10 gene	PREDICTED: Rattus norvegicus similar to RIKEN cDNA 4933424A10 gene (predicted) (RGD1565514_predicted), mRNA [XM_001058342]	A_44_P466671	0.0215779	up	1.62473
		AA892888 EST196691 Normalized rat kidney, Bento Soares Rattus sp. cDNA clone RKIAY54 3' end, mRNA sequence [AA892888]	A_44_P943207	0.0499203	up	1.18241	Rn.145341
Gsta3	glutathione S-transferase A3	Rattus norvegicus glutathione S-transferase A3 (Gsta3), mRNA [NM_031509]	A_42_P624195	0.00505563	up	1.26714	Rn.10460
Degs1	degenerative spermatocyte homolog 1, lipid desaturase (Drosophila)"		A_43_P12764	0.00553977	up	1.05225	chr13:98243144-98243085
		Rattus norvegicus similar to T-cell receptor alpha chain V region PHDS58 precursor (LOC290134), mRNA [XM_224090]	A_44_P107638	0.0446583	down	1.14707
LOC299213	similar to Glyceraldehyde-3-phosphate dehydrogenase (GAPDH) (38 kDa BFA-dependent ADP-ribosylation substrate) (BARS-38)	PREDICTED: Rattus norvegicus similar to Glyceraldehyde-3-phosphate dehydrogenase (GAPDH) (38 kDa BFA-dependent ADP-ribosylation substrate) (BARS-38) (LOC299213), mRNA [XR_006468]	A_44_P293283	0.0164914	down	1.2701	Rn.197530
		Rattus norvegicus vitamin A responsive; cytoskeleton related (Jwa), mRNA [NM_022682]	A_44_P359426	0.0490605	down	1.53105
S100a6	S100 calcium binding protein A6	UI-R-EA0-ckw-i-20-0-UI.s1 UI-R-EA0 Rattus norvegicus cDNA clone UI-R-EA0-ckw-i-20-0-UI 3', mRNA sequence [BQ196729]	A_44_P519487	0.0210334	down	1.13109	Rn.3233
		PREDICTED: Rattus norvegicus similar to cell surface receptor FDFACT (predicted) (RGD1561143_predicted), mRNA [XM_222031]	A_44_P435955	0.0336104	up	1.80212	Rn.164512
			A_44_P900608	0.0202379	down	1.18198
LOC498265	similar to hypothetical protein FLJ10706	Rattus norvegicus similar to hypothetical protein FLJ10706 (LOC498265), mRNA [NM_001017493]	A_44_P852055	0.0311445	down	1.03381	Rn.205873
		BQ190589 UI-R-DQ1-ckv-k-24-0-UI.s1 UI-R-DQ1 Rattus norvegicus cDNA clone UI-R-DQ1-ckv-k-24-0-UI 3', mRNA sequence [BQ190589]	A_44_P464572	0.0208226	up	1.42809	Rn.162528
Chd7	chromodomain helicase DNA binding protein 7	Rattus norvegicus chromodomain helicase DNA binding protein 7 (Chd7), mRNA [NM_001107906]	A_44_P485388	0.0398541	down	1.30512	Rn.37783
Cby1	chibby homolog 1 (Drosophila)	Rattus norvegicus chibby homolog 1 (Drosophila) (Cby1), mRNA [NM_145676]	A_44_P139836	0.0389754	up	1.33061	Rn.3025
Stat1	signal transducer and activator of transcription 1	Rattus norvegicus signal transducer and activator of transcription 1 (Stat1), transcript variant alpha, mRNA [NM_032612]	A_43_P10593	0.0109753	up	1.71287	Rn.33229
			A_44_P838429	0.0331029	up	1.3199
Sppl3	signal peptide peptidase 3	PREDICTED: Rattus norvegicus similar to Hypothetical protein MGC75937 (predicted) (RGD1562826_predicted), mRNA [XM_341096]	A_44_P252861	0.00329631	down	1.14123	Rn.5977
Uckl1	uridine-cytidine kinase 1-like 1	Rattus norvegicus uridine-cytidine kinase 1-like 1 (Uckl1), mRNA [NM_001109212]	A_44_P295334	0.0475496	up	1.13985	Rn.35240
		UI-R-FS1-cqd-d-04-0-UI.s1 UI-R-FS1 Rattus norvegicus cDNA clone UI-R-FS1-cqd-d-04-0-UI 3', mRNA sequence [CA507699]	A_44_P762552	0.001113	up	1.07691	Rn.213938
Tank	TRAF family member-associated NFKB activator	Rattus norvegicus TRAF family member-associated NFKB activator (Tank), mRNA [NM_145788]	A_44_P111575	0.00513375	up	1.02919	Rn.89906
Stxbp5l	syntaxin binding protein 5-like	PREDICTED: Rattus norvegicus syntaxin binding protein 5-like (predicted) (Stxbp5l_predicted), mRNA [XM_221424]	A_44_P375665	0.0140338	down	1.18131
Clk2	CDC-like kinase 2	Rattus norvegicus CDC-like kinase 2 (Clk2), mRNA [NM_001014254]	A_44_P538946	0.0155095	up	1.12332	Rn.17201
Irgq	immunity-related GTPase family, Q"		A_44_P170778	0.0268994	down	1.09234	chr1:79821105-79821164
Mmp24	matrix metallopeptidase 24	Rattus norvegicus matrix metallopeptidase 24 (Mmp24), mRNA [NM_031757]	A_43_P12665	0.00709253	down	1.80471	Rn.3117
Gng5	guanine nucleotide binding protein (G protein), gamma 5"		A_44_P1045960	0.0269904	down	1.15664	chr2:244706562-244706621
		BC025220 PQ loop repeat containing {Mus musculus} (exp=-1; wgp=0; cg=0), partial (6%) [TC587712]	A_44_P562529	0.0184736	up	1.15152
		Q3ZCU4_HUMAN (Q3ZCU4) LEF1 protein, partial (7%) [TC585827]	A_44_P975889	0.0488748	down	1.44973
		Rattus norvegicus similar to 2610042L04Rik protein (LOC367556), mRNA [XM_346210]	A_44_P419757	0.0359728	up	1.69177
Brd1	bromodomain containing 1	Rattus norvegicus bromodomain containing 1 (Brd1), mRNA [NM_001108103]	A_44_P470043	0.0458375	up	1.40558	Rn.9133
		BF410227 UI-R-CA1-bjv-a-05-0-UI.s1 UI-R-CA1 Rattus norvegicus cDNA clone UI-R-CA1-bjv-a-05-0-UI 3', mRNA sequence [BF410227]	A_44_P455501	0.00173555	up	1.28563	Rn.41
Rin2	Ras and Rab interactor 2	Rattus norvegicus Ras and Rab interactor 2 (Rin2), mRNA [NM_001107786]	A_44_P680341	0.0130853	up	1.40876	Rn.34193
Ssh2	slingshot homolog 2 (Drosophila)	Rattus norvegicus slingshot homolog 2 (Drosophila) (Ssh2), mRNA [NM_001107024]	A_44_P436577	0.0176018	down	1.05646	Rn.113532
		AI227942 EST224637 Normalized rat brain, Bento Soares Rattus sp. cDNA clone RBRCN88 3' end, mRNA sequence [AI227942]	A_44_P172407	0.00203527	down	1.3356	Rn.146822
		AI408131 EST236421 Normalized rat ovary, Bento Soares Rattus sp. cDNA clone ROVEF44 3' end, mRNA sequence [AI408131]	A_44_P195690	0.00991386	up	1.49101	Rn.205314
Csnk1e	casein kinase 1, epsilon"		A_44_P192988	0.00453514	down	1.13172	chr7:117408177-117407636
			A_44_P943890	0.0366641	down	1.04083
		AA926190 UI-R-A1-ev-g-11-0-UI.s1 UI-R-A1 Rattus norvegicus cDNA clone UI-R-A1-ev-g-11-0-UI 3', mRNA sequence [AA926190]	A_44_P122057	0.00458348	down	1.07741	Rn.121136
Pgf	placental growth factor	Rattus norvegicus placental growth factor (Pgf), mRNA [NM_053595]	A_43_P12864	0.00683609	down	1.0771	Rn.6960
Ift80	intraflagellar transport 80 homolog (Chlamydomonas)	Rattus norvegicus intraflagellar transport 80 homolog (Chlamydomonas) (Ift80), mRNA [NM_001013911]	A_43_P17854	0.0404517	down	1.05407	Rn.6742
S100a4	S100 calcium-binding protein A4	Rattus norvegicus S100 calcium-binding protein A4 (S100a4), mRNA [NM_012618]	A_43_P11489	0.0392773	down	1.20218	Rn.504
Zfp187	zinc finger protein 187	PREDICTED: Rattus norvegicus zinc finger protein 187 (Znf187), mRNA [XM_577579]	A_44_P316172	0.00222134	up	1.03982	Rn.207178
Hey2	hairy/enhancer-of-split related with YRPW motif 2	HES-related repressor protein 1 HERP1 (Fragment). [Source:UniProtKB/TrEMBL;Acc:Q8VIH5] [ENSRNOT00000018718]	A_44_P458999	0.0454531	up	1.05966	Rn.58672
Crb2	crumbs homolog 2 (Drosophila)	Rattus norvegicus crumbs homolog 2 (Drosophila) (Crb2), mRNA [NM_001135761]	A_44_P137967	0.0247682	down	1.17274	Rn.195474
		BQ209739 UI-R-DZ1-cog-e-05-0-UI.s1 NCI_CGAP_DZ1 Rattus norvegicus cDNA clone IMAGE:7348303 3', mRNA sequence [BQ209739]	A_44_P228380	0.00254625	up	1.22118	Rn.77521
Bcl9	B-cell CLL/lymphoma 9	Rattus norvegicus B-cell CLL/lymphoma 9 (Bcl9), mRNA [NM_001107703]	A_43_P17473	0.0423502	down	1.12542	Rn.264
			A_44_P530142	0.036895	down	1.32347
Olr1147	olfactory receptor 1147	Rattus norvegicus olfactory receptor 1147 (Olr1147), mRNA [NM_001000431]	A_44_P175153	0.0220787	up	1.06813	Rn.143596
Fam63a	family with sequence similarity 63, member A"		A_42_P621628	0.0465997	up	1.5434	chr2:190202977-190203036
Hmcn1	hemicentin 1	Rattus norvegicus similar to hemicentin; fibulin 6 (LOC289094), mRNA [XM_222716]	A_44_P269536	0.0185847	up	1.19487	Rn.52931
		AW913982 EST294760 Rat gene index, normalized rat, norvegicus, Bento Soares Rattus norvegicus cDNA clone RGIZA01 5' end, mRNA sequence [AW913982]	A_42_P478138	0.013477	down	1.14109	Rn.165598
			A_44_P913600	0.0148434	up	1.34071
Susd3	sushi domain containing 3	Rattus norvegicus sushi domain containing 3 (Susd3), mRNA [NM_001107341]	A_42_P601961	0.0394786	down	1.25016	Rn.3005
Shroom4	shroom family member 4	PREDICTED: Rattus norvegicus similar to mKIAA1202 protein (predicted) (RGD1563434_predicted), mRNA [XM_228786]	A_44_P396286	0.0476225	up	1.34959	Rn.136522
Mxd1	max dimerization protein 1	Rattus norvegicus max dimerization protein 1 (Mxd1), mRNA [NM_001100749]	A_44_P342008	0.0136411	down	1.07122	Rn.104328
		Q70R55_9HIV1 (Q70R55) Gp120 protein (Fragment), partial (7%) [TC589290]	A_44_P607517	0.0390267	up	1.7015
Sema4g	sema domain, immunoglobulin domain (Ig), transmembrane domain (TM) and short cytoplasmic domain, (semaphorin) 4G"		A_44_P440772	0.0152058	down	1.17206	chr1:250064025-250064084
			A_44_P654037	0.0273461	up	1.22782
		R.norvegicus mRNA for immunoglobulin variable region (clone ERF1.25). [Z93350]	A_44_P100310	0.0228571	down	1.06706	Rn.220311
		CB546475 AMGNNUC:NRHY5-00191-B6-A W Rat hypothalamus (10471) Rattus norvegicus cDNA clone nrhy5-00191-b6 5', mRNA sequence [CB546475]	A_44_P101223	0.00834254	up	1.06619	Rn.219640
		RUVC_PSEF5 (Q4K7D7) Crossover junction endodeoxyribonuclease ruvC (Holliday junction nuclease ruvC) (Holliday juction resolvase ruvC) , partial (9%) [TC591147]	A_42_P822764	0.014051	up	1.3322
		UI-R-BJ1-asz-g-05-0-UI.s10 UI-R-BJ1 Rattus norvegicus cDNA clone UI-R-BJ1-asz-g-05-0-UI 3', mRNA sequence [CK844890]	A_44_P355594	0.0106155	up	1.38283	Rn.9183
Cpt1b	carnitine palmitoyltransferase 1b, muscle"		A_44_P156582	0.0338291	up	1.1422	chr7:127745116-127744759
Epm2a	epilepsy, progressive myoclonic epilepsy, type 2 gene alpha"		A_44_P452186	0.0347219	up	1.14242	chr1:6171960-6172019
		CB547880 AMGNNUC:NRDG1-00201-B1-A nrdg1 (10855) Rattus norvegicus cDNA clone nrdg1-00201-b1 5', mRNA sequence [CB547880]	A_44_P549109	0.0194076	down	1.33735
Impad1	inositol monophosphatase domain containing 1	Rattus norvegicus Ac2-190 mRNA, complete cds. [AY321340]	A_44_P139851	0.0132311	up	1.08218	Rn.129949
Arhgap23	Rho GTPase activating protein 23	PREDICTED: Rattus norvegicus Rho GTPase activating protein 23 (predicted) (Arhgap23_predicted), mRNA [XM_220918]	A_42_P507877	0.00344906	down	1.22914	Rn.6554
		AI556406 UI-R-C2p-rh-c-04-0-UI.s1 UI-R-C2p Rattus norvegicus cDNA clone UI-R-C2p-rh-c-04-0-UI 3', mRNA sequence [AI556406]	A_44_P451852	0.0463649	up	1.14731	Rn.162811
Vamp4	vesicle-associated membrane protein 4	Rattus norvegicus vesicle-associated membrane protein 4 (Vamp4), mRNA [NM_001108856]	A_44_P155775	0.00699519	up	1.09476	Rn.105555
			A_44_P152317	0.0488001	down	1.2917
Eif3i	eukaryotic translation initiation factor 3, subunit I"		A_44_P203064	0.0497644	up	1.14547	chr2:145735334-145735392
		AA851161 EST193929 Normalized rat placenta, Bento Soares Rattus sp. cDNA clone RPLAD27 3' end, mRNA sequence [AA851161]	A_44_P435320	0.0436354	up	1.08589	Rn.101923
		UI-R-A0-bf-d-12-0-UI.s1 UI-R-A0 Rattus norvegicus cDNA clone UI-R-A0-bf-d-12-0-UI 3' similar to gb [AA858659]	A_44_P491072	0.0368878	down	1.40395	Rn.94884
Plau	plasminogen activator, urokinase"		A_44_P260036	0.0425878	up	1.20664	chr15:3680770-3680711
Sgtb	small glutamine-rich tetratricopeptide repeat (TPR)-containing, beta"		A_44_P468239	0.0388883	up	1.24317	chr2:35057577-35057636
		AI169370 EST215214 Normalized rat kidney, Bento Soares Rattus sp. cDNA clone RKIBR40 3' end, mRNA sequence [AI169370]	A_44_P406874	0.0418862	down	1.24046	Rn.99661
RGD1303232	Phytn_dehydro and Pyr_redox domain containing protein RGD1303232	Rattus norvegicus Phytn_dehydro and Pyr_redox domain containing protein RGD1303232 (RGD1303232), mRNA [NM_001004261]	A_44_P1056401	0.0445169	up	1.29661	Rn.102445
			A_44_P916132	0.00768625	up	3.23912
Cav3	caveolin 3	Rattus norvegicus caveolin 3 (Cav3), mRNA [NM_019155]	A_43_P11954	0.0248763	down	1.18252	Rn.98191
			A_44_P838277	0.0372929	up	1.11934
		AI137629 UI-R-C0-ht-h-01-0-UI.s1 UI-R-C0 Rattus norvegicus cDNA clone UI-R-C0-ht-h-01-0-UI 3', mRNA sequence [AI137629]	A_44_P874806	0.0242418	down	1.24988	Rn.146501
		Rattus norvegicus similar to RIKEN cDNA 0610012D17 (LOC294368), mRNA [XM_228129]	A_44_P370587	0.0203063	down	1.10242
		S57440S13 lipocortin I {Rattus sp.} (exp=-1; wgp=0; cg=0), partial (9%) [TC599592]	A_44_P812604	0.0420381	up	2.11516
Myrip	myosin VIIA and Rab interacting protein	Rattus norvegicus myosin VIIA and Rab interacting protein (Myrip), mRNA [NM_182844]	A_43_P17922	0.0411537	down	1.06459	Rn.161974
			A_44_P854491	0.0342653	up	1.13174
		AI180418 EST224163 Normalized rat spleen, Bento Soares Rattus sp. cDNA clone RSPCX45 3' end, mRNA sequence [AI180418]	A_44_P554598	0.0252672	down	1.15594	Rn.73698
			A_44_P370868	0.0234508	down	1.16075
		Rattus norvegicus similar to X-linked retinitis pigmentosa GTPase regulator (mRpgr) (LOC367733), mRNA [XM_346270]	A_44_P196948	0.0290776	down	1.13311	Rn.215816
RT1-CE5	RT1 class I, CE5"		A_44_P172850	0.0133909	up	2.66026	chr20:3512329-3512270
		BQ201114 UI-R-EB1-clp-p-09-0-UI.s1 UI-R-EB1 Rattus norvegicus cDNA clone UI-R-EB1-clp-p-09-0-UI 3', mRNA sequence [BQ201114]	A_44_P511785	0.0149914	down	1.14135	Rn.15328
Suclg1	succinate-CoA ligase, alpha subunit"		A_44_P399999	0.0298901	up	1.13481	chr4:106601409-106601468
LOC681047	hypothetical protein LOC681047	PREDICTED: Rattus norvegicus hypothetical protein LOC681047 (LOC681047), mRNA [XM_001060083]	A_44_P243477	0.00303816	down	2.18172
		AA924104 UI-R-A1-dt-a-01-0-UI.s1 UI-R-A1 Rattus norvegicus cDNA clone UI-R-A1-dt-a-01-0-UI 3', mRNA sequence [AA924104]	A_44_P114953	0.00844779	down	1.20845	Rn.135470
Gtpbp1	GTP binding protein 1	Rattus norvegicus similar to GTP binding protein 1 (LOC300077), mRNA [XM_216982]	A_43_P20103	0.0492845	down	1.18743
RGD1562428	similar to C20orf95	PREDICTED: Rattus norvegicus similar to C20orf95 (predicted) (RGD1562428_predicted), mRNA [XM_230802]	A_44_P347118	0.0219631	down	1.1455
Mapk8ip1	mitogen-activated protein kinase 8 interacting protein 1	Rattus norvegicus mitogen-activated protein kinase 8 interacting protein 1 (Mapk8ip1), mRNA [NM_053777]	A_44_P107132	0.00960461	down	1.35558	Rn.44266
Fam48a	family with sequence similarity 48, member A"		A_43_P17068	0.0183317	up	1.23339	chr2:143941273-143941332
		Rattus norvegicus similar to olfactory receptor MOR110-5 (LOC366812), mRNA [XM_345786]	A_44_P267660	0.0352135	down	1.36267
Mrps5	mitochondrial ribosomal protein S5	Rattus norvegicus mitochondrial ribosomal protein S5 (Mrps5), nuclear gene encoding mitochondrial protein, mRNA [NM_001106505]	A_42_P708541	0.00437519	up	1.25228	Rn.9035
Syt5	synaptotagmin V	Rattus norvegicus synaptotagmin V (Syt5), mRNA [NM_019350]	A_43_P12034	0.0357432	down	1.08771	Rn.11030
Mup4	major urinary protein 4	Rattus norvegicus major urinary protein 4 (Mup4), mRNA [NM_198784]	A_44_P545566	0.0201672	up	1.5976	Rn.107064
Mrc1	mannose receptor, C type 1"		A_43_P18738	0.0217835	up	1.39699	chr17:88489156-88491763
		CB547054 AMGNNUC:SRPB2-00051-D8-A srpb2 (10220) Rattus norvegicus cDNA clone srpb2-00051-d8 5', mRNA sequence [CB547054]	A_44_P234918	0.0212671	down	1.18222	Rn.159368
		AW142507 EST292759 Normalized rat embryo, Bento Soares Rattus sp. cDNA clone RGIAO08 5' end, mRNA sequence [AW142507]	A_44_P620480	0.0146628	up	1.34371	Rn.2064
Lrrn1	leucine rich repeat neuronal 1	Rattus norvegicus leucine rich repeat neuronal 1 (Lrrn1), mRNA [NM_001037363]	A_44_P684180	0.00688389	down	1.25157	Rn.96330
		UI-R-E0-cl-e-06-0-UI.s2 UI-R-E0 Rattus norvegicus cDNA clone UI-R-E0-cl-e-06-0-UI 3', mRNA sequence [AA899342]	A_44_P187896	0.00659562	up	1.52695	Rn.203325
		Q4WQR9_ASPFU (Q4WQR9) Monooxygenase, partial (7%) [TC629807]	A_44_P808724	0.0201742	down	1.15765
			A_44_P778916	0.00104417	up	1.05141
Ap1s1	adaptor-related protein complex 1, sigma 1 subunit"		A_44_P140051	0.0467128	up	1.26656	chr12:20914132-20910452
		AW917950 EST349254 Rat gene index, normalized rat, norvegicus, Bento Soares Rattus norvegicus cDNA clone RGIEK49 5' end, mRNA sequence [AW917950]	A_44_P348778	0.0258659	up	1.38885	Rn.23323
Gtf2a2	general transcription factor IIA, 2"		A_43_P12778	0.000412784	down	1.14847	chr8:74447892-74449131
Pou3f4	POU class 3 homeobox 4	Rattus norvegicus POU class 3 homeobox 4 (Pou3f4), mRNA [NM_017252]	A_42_P543895	0.0244618	down	1.10713	Rn.33030
		EST221911 Normalized rat placenta, Bento Soares Rattus sp. cDNA clone RPLCN95 3' end, mRNA sequence [AI178246]	A_44_P514458	0.0408219	up	1.11884	Rn.159491
		AI043899 UI-R-C0-jk-f-01-0-UI.s1 UI-R-C0 Rattus norvegicus cDNA clone UI-R-C0-jk-f-01-0-UI 3', mRNA sequence [AI043899]	A_44_P148603	0.00709659	up	1.25113	Rn.17361
RGD1308759	similar to KIAA0892 protein	Rattus norvegicus similar to KIAA0892 protein (RGD1308759), mRNA [NM_001106077]	A_44_P813453	0.0224574	up	1.14009	Rn.49215
LOC365948	similar to AVIEF	Rattus norvegicus similar to AVIEF (LOC365948), mRNA [XM_345295]	A_44_P224948	0.0401634	up	1.12275
		AI103071 EST212360 Normalized rat embryo, Bento Soares Rattus sp. cDNA clone REMBW83 3' end, mRNA sequence [AI103071]	A_44_P193901	0.0358332	up	1.1432	Rn.87083
Sstr3	somatostatin receptor 3	Rattus norvegicus somatostatin receptor 3 (Sstr3), mRNA [NM_133522]	A_42_P718331	0.0292997	down	1.43794	Rn.10458
		BF398788 UI-R-BS2-bes-h-04-0-UI.s1 UI-R-BS2 Rattus norvegicus cDNA clone UI-R-BS2-bes-h-04-0-UI 3', mRNA sequence [BF398788]	A_44_P406504	0.0130841	down	1.37378	Rn.167061
		Q3TBD8_MOUSE (Q3TBD8) NOD-derived CD11c +ve dendritic cells cDNA, RIKEN full-length enriched library, clone:F630327B08 product:Rho-related BTB domain containing 2, full insert sequence, partial (3%) [TC632750]	A_44_P624624	0.0492334	up	1.94541
Map2	microtubule-associated protein 2	Rattus norvegicus microtubule-associated protein 2 (Map2), mRNA [NM_013066]	A_44_P111897	0.0226697	down	1.16057	Rn.10484
		Rattus norvegicus similar to RIKEN cDNA 1700001E04 (LOC367382), mRNA [XM_346117]	A_44_P297743	0.0239754	down	1.37641
Dhh	desert hedgehog homolog (Drosophila)	Desert hedgehog protein (Fragment). [Source:UniProtKB/TrEMBL;Acc:Q9WUP6] [ENSRNOT00000020563]	A_44_P639832	0.0208236	down	1.62949	Rn.84274
Plk3	polo-like kinase 3 (Drosophila)	Rattus norvegicus polo-like kinase 3 (Drosophila) (Plk3), mRNA [NM_022187]	A_44_P543283	0.0041759	down	1.35094	Rn.9284
Cacna1e	calcium channel, voltage-dependent, R type, alpha 1E subunit"		A_44_P297167	0.0219601	down	1.1356	chr13:69372665-69372611
Ncf4	neutrophil cytosolic factor 4	Rattus norvegicus neutrophil cytosolic factor 4 (Ncf4), mRNA [NM_001127304]	A_44_P286788	0.0127586	down	1.28113	Rn.46120
F12	coagulation factor XII (Hageman factor)	Rattus norvegicus coagulation factor XII (Hageman factor) (F12), mRNA [NM_001014006]	A_44_P189853	0.0152437	down	1.07573	Rn.53943
			A_44_P793591	0.0198916	down	1.1029
Psd2	pleckstrin and Sec7 domain containing 2	Rattus norvegicus pleckstrin and Sec7 domain containing 2 (Psd2), mRNA [NM_001107395]	A_44_P380002	0.0300579	down	1.16065	Rn.165349
Prkaa2	protein kinase, AMP-activated, alpha 2 catalytic subunit"		A_44_P154112	0.0457228	up	1.17974	chr5:126007970-126007911
Vps26a	vacuolar protein sorting 26 homolog A (S. pombe)	Rattus norvegicus vacuolar protein sorting 26 homolog A (S. pombe) (Vps26a), mRNA [NM_001007740]	A_44_P166278	0.0449147	up	1.09882	Rn.3673
		AA900893 UI-R-E0-dc-a-09-0-UI.s1 UI-R-E0 Rattus norvegicus cDNA clone UI-R-E0-dc-a-09-0-UI 3', mRNA sequence [AA900893]	A_44_P241845	0.0452776	up	1.13652
		AA925805 UI-R-A1-et-g-09-0-UI.s1 UI-R-A1 Rattus norvegicus cDNA clone UI-R-A1-et-g-09-0-UI 3' similar to gi [AA925805]	A_44_P485786	0.033576	down	1.10692	Rn.85735
Slc38a3	solute carrier family 38, member 3"		A_42_P703023	0.00741311	down	1.14896	chr8:112899158-112899099
Nrsn2	neurensin 2	Rattus norvegicus neurensin 2 (Nrsn2), mRNA [NM_001109561]	A_44_P182905	0.0279266	down	1.17431	Rn.138040
		UI-R-CV2-cgt-f-12-0-UI.s1 UI-R-CV2 Rattus norvegicus cDNA clone UI-R-CV2-cgt-f-12-0-UI 3', mRNA sequence [BI296649]	A_44_P706666	0.0267254	down	1.24296	Rn.212684
		BI282031 UI-R-CU0s-cbv-f-05-0-UI.s1 UI-R-CU0s Rattus norvegicus cDNA clone UI-R-CU0s-cbv-f-05-0-UI 3', mRNA sequence [BI282031]	A_44_P240375	0.00437336	down	1.16013	Rn.74071
			A_44_P245690	0.0174192	up	1.0597
		BI303661 UI-R-DQ0-cja-p-16-0-UI.s1 UI-R-DQ0 Rattus norvegicus cDNA clone UI-R-DQ0-cja-p-16-0-UI 3', mRNA sequence [BI303661]	A_44_P399466	0.0142079	up	1.27408	Rn.105926
Mmp27	matrix metallopeptidase 27	Rattus norvegicus matrix metallopeptidase 27 (Mmp27), mRNA [NM_001106799]	A_44_P1071620	0.00791437	down	3.83292	Rn.218678
		Rattus norvegicus similar to putative pheromone receptor (Go-VN5) (LOC304209), mRNA [XM_221803]	A_44_P297326	0.0183194	up	1.10288
		AI102620 EST211909 Normalized rat embryo, Bento Soares Rattus sp. cDNA clone REMBQ09 3' end, mRNA sequence [AI102620]	A_44_P377965	0.0429951	down	1.57444	Rn.165053
			A_43_P11104	0.049471	down	1.36786
		Rattus norvegicus similar to bA16L21.2.1 (novel DnaJ domain protein similar to Drosophila, C. elegans and Arabidopsis predicted proteins (isoform 1)) (LOC362526), mRNA [XM_342844]	A_44_P229661	0.0309911	up	1.16676
LOC361990	similar to DKFZP547E1010 protein	Rattus norvegicus similar to DKFZP547E1010 protein (LOC361990), mRNA [NM_001014175]	A_44_P161467	0.0252406	up	1.66127	Rn.15859
		AI008687 EST203138 Normalized rat embryo, Bento Soares Rattus sp. cDNA clone REMBB65 3' end, mRNA sequence [AI008687]	A_44_P341093	0.0147224	down	1.44011	Rn.216426
Cnr1	cannabinoid receptor 1 (brain)	Cannabinoid receptor 1 (CB1) (CB-R) (Brain-type cannabinoid receptor). [Source:UniProtKB/Swiss-Prot;Acc:P20272] [ENSRNOT00000010850]	A_44_P1030258	0.00527646	up	1.55364	Rn.89774
		BE108374 UI-R-BS1-ayv-e-09-0-UI.s1 UI-R-BS1 Rattus norvegicus cDNA clone UI-R-BS1-ayv-e-09-0-UI 3', mRNA sequence [BE108374]	A_44_P341731	0.0169419	up	1.21095
Ebp	emopamil binding protein (sterol isomerase)	Rattus norvegicus emopamil binding protein (sterol isomerase) (Ebp), mRNA [NM_057137]	A_43_P13043	0.00552573	down	1.19156	Rn.19436
Olr330	olfactory receptor 330	Rattus norvegicus olfactory receptor 330 (Olr330), mRNA [NM_001000761]	A_44_P531665	0.0247867	down	1.27257	Rn.141701
LOC501912	similar to reticulocalbin	PREDICTED: Rattus norvegicus hypothetical LOC501912 (LOC501912), mRNA [XR_009405]	A_44_P241458	0.00143311	down	1.40353	Rn.196639
		Rattus norvegicus cDNA clone IMAGE:7301487 [BC086429]	A_44_P762275	0.0265932	up	1.15755	Rn.50970
			A_44_P377355	0.0445762	up	1.15895
			A_44_P717389	0.007336	up	1.13206
Plod2	procollagen lysine, 2-oxoglutarate 5-dioxygenase 2"		A_44_P521151	0.0442353	up	2.4331	chr8:97570628-97572202
			A_44_P391964	0.0471686	down	1.09057
Olr304	olfactory receptor 304	Rattus norvegicus olfactory receptor 304 (Olr304), mRNA [NM_001001039]	A_44_P172712	0.0170678	down	1.14382	Rn.141734
Glrx5	glutaredoxin 5	Rattus norvegicus glutaredoxin 5 (Glrx5), mRNA [NM_001108722]	A_42_P581060	0.014647	down	1.49128	Rn.220082
		Q80U07_MOUSE (Q80U07) MKIAA0422 protein (Fragment), partial (7%) [TC620030]	A_44_P671835	0.0115158	down	1.22511
Fubp1	far upstream element (FUSE) binding protein 1	Rattus norvegicus far upstream element (FUSE) binding protein 1 (Fubp1), mRNA [NM_001037653]	A_44_P1059463	0.00567142	down	1.21178	Rn.219485
Dnajc22	DnaJ (Hsp40) homolog, subfamily C, member 22"		A_42_P619114	0.0313362	down	1.69738	chr7:137880570-137880629
Rhox9	reproductive homeobox 9	Rattus norvegicus reproductive homeobox 9 (Rhox9), mRNA [NM_001024874]	A_44_P314208	0.0185603	down	1.20791	Rn.144519
Nr3c2	nuclear receptor subfamily 3, group C, member 2"		A_44_P158441	0.0100273	down	1.38214	chr19:32587247-32587188
		Rattus norvegicus chromosome 20, major histocompatibility complex, assembled from 40 BACs, strain Brown Norway (BN/ssNHsd), RT1n haplotype; segment 8/11 [BX883049]	A_44_P531082	0.0356166	up	1.1502	Rn.873
Clip1	CAP-GLY domain containing linker protein 1	Rattus norvegicus CAP-GLY domain containing linker protein 1 (Clip1), mRNA [NM_031745]	A_44_P1031034	0.0345684	up	1.31532	Rn.22069
RGD1561425	similar to RIKEN cDNA 4832428D23 gene	Rattus norvegicus hypothetical LOC301378 (LOC301378), mRNA [XM_217389]	A_44_P133618	0.0289767	up	1.08404
Calb2	calbindin 2	Rattus norvegicus calbindin 2 (Calb2), mRNA [NM_053988]	A_42_P698310	0.0414106	up	1.07225	Rn.10321
			A_42_P536266	0.0361293	up	1.51739
Amhr2	anti-Mullerian hormone receptor, type II"		A_44_P229277	0.0232263	up	1.19586	chr7:141210499-141210674
		AI144652 UI-R-BT0-pl-e-08-0-UI.s1 UI-R-BT0 Rattus norvegicus cDNA clone UI-R-BT0-pl-e-08-0-UI 3', mRNA sequence [AI144652]	A_44_P491238	0.0430967	down	1.30637	Rn.32947
Ccl4	chemokine (C-C motif) ligand 4	Rattus norvegicus chemokine (C-C motif) ligand 4 (Ccl4), mRNA [NM_053858]	A_44_P212551	0.0294672	up	1.56303	Rn.37880
		BI281080 UI-R-DD0-bzr-a-04-0-UI.s1 UI-R-DD0 Rattus norvegicus cDNA clone UI-R-DD0-bzr-a-04-0-UI 3', mRNA sequence [BI281080]	A_44_P228764	0.047772	up	1.1242	Rn.198278
Ctgf	connective tissue growth factor	Rattus norvegicus connective tissue growth factor (Ctgf), mRNA [NM_022266]	A_42_P484738	0.0373216	up	1.94596	Rn.17145
Grin2d	glutamate receptor, ionotropic, N-methyl D-aspartate 2D"		A_44_P425143	0.0381508	down	1.21002	chr1:96309561-96309502
			A_44_P793670	0.042902	down	1.18481
Scn8a	sodium channel, voltage-gated, type 8, alpha subunit"		A_44_P168190	0.0154529	down	1.25928
Rasl11a	RAS-like family 11 member A	Rattus norvegicus RAS-like family 11 member A (Rasl11a), mRNA [NM_001002829]	A_44_P320752	0.0383931	down	1.26897	Rn.105901
Asz1	ankyrin repeat, SAM and basic leucine zipper domain containing 1"		A_44_P395642	0.0477788	down	1.09652	chr4:43728709-43728650
		AI029183 UI-R-C0-iv-h-08-0-UI.s1 UI-R-C0 Rattus norvegicus cDNA clone UI-R-C0-iv-h-08-0-UI 3', mRNA sequence [AI029183]	A_44_P547197	0.0152377	down	1.30999	Rn.10346
Tada2l	transcriptional adaptor 2 (ADA2 homolog, yeast)-like"		A_44_P286506	0.0170661	up	1.92177	chr10:72377464-72377405
Necap1	NECAP endocytosis associated 1	Rattus norvegicus NECAP endocytosis associated 1 (Necap1), mRNA [NM_001029919]	A_42_P645110	0.0488369	up	1.13626	Rn.58356
		Rattus norvegicus similar to RIKEN cDNA 1110003E01 (LOC364154), mRNA [XM_344241]	A_44_P379832	0.0141196	down	1.14149
		O41021_PBCV1 (O41021) A312aR protein, partial (19%) [TC597010]	A_44_P637872	0.0250048	down	1.31628
			A_44_P356482	0.0175193	up	1.09432
Rad52	RAD52 homolog (S. cerevisiae)	Rattus norvegicus RAD52 homolog (S. cerevisiae) (Rad52), mRNA [NM_001106617]	A_44_P400922	0.0382544	up	1.16945	Rn.8154
		Rattus norvegicus similar to S6 kinase 2 (LOC361696), mRNA [XM_341979]	A_44_P428922	0.0155438	up	1.37971	Rn.4188
		AA848813 EST191574 Normalized rat lung, Bento Soares Rattus sp. cDNA clone RLUAG72 3' end, mRNA sequence [AA848813]	A_44_P266154	0.0309756	down	1.11959	Rn.40477
		Q2RGR0_MOOTA (Q2RGR0) Nitrilase/cyanide hydratase and apolipoprotein N-acyltransferase, partial (5%) [TC631947]	A_44_P889591	0.0125986	up	1.23646
		AA943163 EST198662 Normalized rat brain, Bento Soares Rattus sp. cDNA clone RBRAF92 3' end, mRNA sequence [AA943163]	A_44_P895970	0.0419882	down	1.67598	Rn.1476
		Histone H4 [Contains: Osteogenic growth peptide (OGP)]. [Source:UniProtKB/Swiss-Prot;Acc:P62804] [ENSRNOT00000046279]	A_44_P379680	0.000260245	down	1.82475
Ttyh1	tweety homolog 1 (Drosophila)	Rattus norvegicus tweety homolog 1 (Drosophila) (Ttyh1), mRNA [NM_001106225]	A_44_P482700	0.02321	down	1.33579	Rn.14889
Ak3l1	adenylate kinase 3-like 1	Adenylate kinase isoenzyme 4, mitochondrial (EC 2.7.4.3) (Adenylate kinase 3-like) (ATP-AMP transphosphorylase). [Source:UniProtKB/Swiss-Prot;Acc:Q9WUS0] [ENSRNOT00000015601]	A_44_P745269	0.00620463	up	1.20418	Rn.1086
Cfb	complement factor B	Rattus norvegicus complement factor B (Cfb), mRNA [NM_212466]	A_44_P419064	0.0303269	up	2.71516	Rn.109148
Gas7	growth arrest specific 7	Rattus norvegicus growth arrest specific 7 (Gas7), mRNA [NM_053484]	A_44_P177465	0.0257294	up	1.4407	Rn.17160
		BE110143 UI-R-BJ1-avf-e-12-0-UI.s1 UI-R-BJ1 Rattus norvegicus cDNA clone UI-R-BJ1-avf-e-12-0-UI 3', mRNA sequence [BE110143]	A_44_P602419	0.0198114	down	1.27872	Rn.174538
Pappa	pregnancy-associated plasma protein A	Rattus norvegicus pregnancy-associated plasma protein A (Pappa), mRNA [NM_001107939]	A_43_P22638	0.0165645	up	1.40454	Rn.207940
			A_44_P933802	0.00162144	down	1.15112
Kcnmb4	potassium large conductance calcium-activated channel, subfamily M, beta member 4"		A_44_P491976	0.0195529	down	1.11336	chr7:55782224-55782165
Pir	pirin (iron-binding nuclear protein)	Rattus norvegicus pirin (iron-binding nuclear protein) (Pir), mRNA [NM_001009474]	A_43_P17743	0.0385821	up	1.49882	Rn.103685
		BI296346 UI-R-DK0-cez-c-09-0-UI.s1 UI-R-DK0 Rattus norvegicus cDNA clone UI-R-DK0-cez-c-09-0-UI 3', mRNA sequence [BI296346]	A_44_P314536	0.0420183	down	1.3676	Rn.1638
		AA900641 UI-R-E0-di-e-02-0-UI.s1 UI-R-E0 Rattus norvegicus cDNA clone UI-R-E0-di-e-02-0-UI 3', mRNA sequence [AA900641]	A_44_P154920	0.0160474	up	1.94379
		AI045333 UI-R-C1-kh-e-06-0-UI.s1 UI-R-C1 Rattus norvegicus cDNA clone UI-R-C1-kh-e-06-0-UI 3', mRNA sequence [AI045333]	A_44_P544447	0.00443588	down	1.21838	Rn.103144
RGD1563956	similar to 60S ribosomal protein L12	Rattus norvegicus similar to 60S ribosomal protein L12 (LOC303815), mRNA [XM_221308]	A_44_P525693	0.0401207	up	1.11873
Rnf135	ring finger protein 135	Rattus norvegicus ring finger protein 135 (Rnf135), mRNA [NM_001012010]	A_43_P20056	0.0402355	down	1.21229	Rn.7462
		AMGNNUC:NRHY7-00028-H6-A nrhy7 (10850) Rattus norvegicus cDNA clone nrhy7-00028-h6 5', mRNA sequence [CB726021]	A_44_P934998	0.0164408	down	1.08323	Rn.148016
			A_44_P102952	0.0497587	down	1.12769
		AGENCOURT_118855592 NIH_MGC_246 Rattus norvegicus cDNA clone IMAGE:8882314 5', mRNA sequence [EX493435]	A_43_P11359	0.0186267	up	1.37261	Rn.67402
		AA848530 EST191290 Normalized rat kidney, Bento Soares Rattus sp. cDNA clone RKIAC86 3' end, mRNA sequence [AA848530]	A_44_P416045	0.00378371	down	1.22839	Rn.106890
RGD1304884	similar to RIKEN cDNA 6430548M08	Rattus norvegicus similar to RIKEN cDNA 6430548M08 (RGD1304884), mRNA [NM_001107436]	A_44_P372950	0.0489963	down	1.2062	Rn.199301
Cyb5r1	cytochrome b5 reductase 1	Rattus norvegicus cytochrome b5 reductase 1 (Cyb5r1), mRNA [NM_001013126]	A_44_P468544	0.0331467	down	1.12665	Rn.100496
		AI136231 UI-R-C2p-nv-c-06-0-UI.s1 UI-R-C2p Rattus norvegicus cDNA clone UI-R-C2p-nv-c-06-0-UI 3', mRNA sequence [AI136231]	A_44_P416137	0.0177295	up	1.18699	Rn.107690
		S39392 protein tyrosine phosphatase {Homo sapiens} (exp=-1; wgp=0; cg=0), partial (3%) [TC613950]	A_44_P930192	0.00171194	down	1.1403
		Q4MHP7_BACCE (Q4MHP7) Cytochrome d ubiquinol oxidase, subunit II (Fragment) , partial (8%) [TC599821]	A_44_P838313	0.00182348	up	1.21552
LOC689296	similar to expressed sequence C79407	Rattus norvegicus similar to expressed sequence C79407 (LOC689296), mRNA [NM_001109531]	A_44_P426924	0.044105	up	1.24895	Rn.178359
Lgals5	lectin, galactose binding, soluble 5"		A_44_P423691	0.0471476	down	1.58999	chr10:65076057-65075998
Abcb1b	ATP-binding cassette, sub-family B (MDR/TAP), member 1B"		A_44_P141897	0.00764943	up	1.11324	chr4:21899463-21899522
Nalp5	NACHT, leucine rich repeat and PYD containing 5"		A_44_P360926	0.0482456	up	1.20005	chr1:66212923-66212864
		Rattus norvegicus similar to 6820428L09 protein (LOC305101), mRNA [XM_223116]	A_43_P19445	0.0135909	down	1.41083
		AI501213 UI-R-C2p-ry-b-02-0-UI.s1 UI-R-C2p Rattus norvegicus cDNA clone UI-R-C2p-ry-b-02-0-UI 3', mRNA sequence [AI501213]	A_44_P528679	0.0137655	down	1.97049	Rn.167316
Olr1337	olfactory receptor 1337	Rattus norvegicus olfactory receptor 1337 (Olr1337), mRNA [NM_001000480]	A_44_P177590	0.019455	down	1.10619	Rn.143465
		Rattus norvegicus similar to Sodium/potassium-transporting ATPase beta-3 chain (Sodium/potassium-dependent ATPase beta-3 subunit) (ATPB-3) (LOC300729), mRNA [XM_213132]	A_44_P473648	0.0426927	up	1.11416
		AI171654 EST217627 Normalized rat muscle, Bento Soares Rattus sp. cDNA clone RMUBN88 3' end, mRNA sequence [AI171654]	A_44_P115769	0.0325153	down	1.10073	Rn.86075
Olr1660	olfactory receptor 1660	Rattus norvegicus olfactory receptor 1660 (Olr1660), mRNA [NM_001000106]	A_44_P536226	0.0207989	up	1.19967	Rn.142505
Eef2k	eukaryotic elongation factor-2 kinase	Elongation factor 2 kinase (EC 2.7.11.20) (eEF-2 kinase) (eEF-2K) (Calcium/calmodulin-dependent eukaryotic elongation factor 2 kinase). [Source:UniProtKB/Swiss-Prot;Acc:P70531] [ENSRNOT00000022726]	A_44_P517591	0.0328675	up	1.47056	Rn.10958
		AI175208 EST218738 Normalized rat muscle, Bento Soares Rattus sp. cDNA clone RMUCE15 3' end, mRNA sequence [AI175208]	A_44_P388431	0.00211725	down	1.12679	Rn.13518
Pask	PAS domain containing serine/threonine kinase	Rattus norvegicus PAS domain containing serine/threonine kinase (Pask), mRNA [NM_001009362]	A_43_P18802	0.00196325	up	1.28776	Rn.66676
		UI-R-E1-fu-g-12-0-UI.s1 UI-R-E1 Rattus norvegicus cDNA clone UI-R-E1-fu-g-12-0-UI 3', mRNA sequence [AA957332]	A_44_P129009	0.027107	up	1.09105	Rn.23152
RGD1564712	RGD1564712	Rattus norvegicus RGD1564712 (RGD1564712), mRNA [NM_001106931]	A_44_P368202	0.0438008	down	1.1387	Rn.161840
Alkbh4	alkB, alkylation repair homolog 4 (E. coli)"		A_42_P695036	0.0406145	down	1.3397	chr12:21640555-21640496
RGD1307844	similar to 106 kDa O-GlcNAc transferase-interacting protein	Rattus norvegicus similar to 106 kDa O-GlcNAc transferase-interacting protein (RGD1307844), mRNA [NM_001134565]	A_44_P1056429	0.0370765	up	1.27878	Rn.3090
		Rattus norvegicus similar to paired immunoglobin-like type 2 receptor beta 1; immunoglobulin-like cell surface receptor FDFACT, activating counterpart (LOC360783), mRNA [XM_341050]	A_44_P330565	0.0191826	up	1.26411
Slc16a8	solute carrier family 16, member 8 (monocarboxylic acid transporter 3)"		A_44_P250403	0.0134724	down	1.05392	chr7:117235335-117235276
		RVL6921 Wackym-Soares normalized rat vestibular cDNA library Rattus norvegicus cDNA 5', mRNA sequence [DV716564]	A_44_P561626	0.0148711	up	1.24435	Rn.19628
Gtf2ird1	general transcription factor II I repeat domain-containing 1	Rattus norvegicus general transcription factor II I repeat domain-containing 1 (Gtf2ird1), mRNA [NM_001001504]	A_42_P772256	0.0256825	up	1.15076	Rn.84872
		AI102795 EST212084 Normalized rat embryo, Bento Soares Rattus sp. cDNA clone REMBS78 3' end, mRNA sequence [AI102795]	A_44_P242690	0.0354206	down	1.3646	Rn.1653
		BE105136 UI-R-BX0-asg-h-05-0-UI.s1 UI-R-BX0 Rattus norvegicus cDNA clone UI-R-BX0-asg-h-05-0-UI 3', mRNA sequence [BE105136]	A_44_P476926	0.0318389	up	1.15122	Rn.147753
Reep5	receptor accessory protein 5	Rattus norvegicus receptor accessory protein 5 (Reep5), mRNA [NM_001108888]	A_44_P433771	0.000125819	down	1.05864	Rn.40477
		Q5SSP7_MOUSE (Q5SSP7) T-box 2, partial (8%) [TC637917]	A_44_P623479	0.0152041	down	1.07858
RGD1561185	similar to putative protein kinase		A_44_P534292	0.0051877	down	1.78364	Rn.198062
Gja5	gap junction protein, alpha 5"		A_44_P382979	0.0375001	down	1.51669	chr2:191843775-191843834
		CB544812 AMGNNUC:URRG1-00066-F1-A urrg1 (14046) Rattus norvegicus cDNA clone urrg1-00066-f1 5', mRNA sequence [CB544812]	A_44_P110801	0.0359825	up	1.11222	Rn.66100
		Shultzomica03919 Rat lung airway and parenchyma cDNA libraries Rattus norvegicus cDNA clone Contig3474 5', mRNA sequence [CF110668]	A_44_P788597	0.0348477	up	1.34542	Rn.163645
Inpp4b	inositol polyphosphate-4-phosphatase, type II"		A_44_P203416	0.0310983	down	1.29302	chr19:27769645-27769586
			A_44_P778608	0.00970609	up	1.18482
		BM389934 UI-R-CN1-cji-n-22-0-UI.s1 UI-R-CN1 Rattus norvegicus cDNA clone UI-R-CN1-cji-n-22-0-UI 3', mRNA sequence [BM389934]	A_44_P199589	0.000432101	up	1.15544	Rn.22858
RGD1560096	similar to TDPOZ1; POZ 56 protein	PREDICTED: Rattus norvegicus similar to TDPOZ1; POZ 56 protein (predicted) (RGD1560096_predicted), mRNA [XM_227345]	A_44_P775591	0.00699414	up	1.13958	Rn.197906
		Q370V1_RHOPA (Q370V1) Enoyl-CoA hydratase/isomerase, partial (6%) [TC613578]	A_44_P610294	0.013691	up	1.37961
Map1b	microtubule-associated protein 1B	Rattus norvegicus microtubule-associated protein 1B (Map1b), mRNA [NM_019217]	A_44_P1031571	0.0143603	up	1.52844	Rn.98152
		AI176554 EST220141 Normalized rat ovary, Bento Soares Rattus sp. cDNA clone ROVBT75 3' end, mRNA sequence [AI176554]	A_44_P410591	0.0148194	up	1.18115	Rn.164546
		AMGNNUC:URRG1-00065-F6-A urrg1 (14046) Rattus norvegicus cDNA clone urrg1-00065-f6 5', mRNA sequence [CB784178]	A_44_P347766	0.0359529	up	1.10161	Rn.147536
Sema3c	sema domain, immunoglobulin domain (Ig), short basic domain, secreted, (semaphorin) 3C"		A_44_P919314	0.0218862	down	1.28939	chr4:13741685-13741626
Tcea1	transcription elongation factor A (SII) 1	Rattus norvegicus transcription elongation factor A (SII) 1 (Tcea1), mRNA [NM_001025735]	A_44_P897537	0.0306097	up	1.12699	Rn.6738
RGD1563131	similar to Serine/threonine-protein kinase WNK3 (Protein kinase, lysine-deficient 3)"		A_44_P838961	0.0353633	up	2.10094	chrX:40640230-40640289
Nod2	nucleotide-binding oligomerization domain containing 2	nucleotide-binding oligomerization domain containing 2 [Source:RefSeq_peptide;Acc:NP_001099642] [ENSRNOT00000018996]	A_44_P236563	0.0153206	down	1.50442
			A_42_P640019	0.00904701	up	1.18197
Pgs1	phosphatidylglycerophosphate synthase 1	PREDICTED: Rattus norvegicus similar to phosphatidylglycerophosphate synthase (predicted) (RGD1305052_predicted), mRNA [XM_221142]	A_44_P147726	0.0140321	up	1.1687	Rn.50013
Edem3	ER degradation enhancer, mannosidase alpha-like 3	PREDICTED: Rattus norvegicus similar to 2310050N11Rik protein (predicted) (RGD1561496_predicted), mRNA [XM_222721]	A_44_P482721	0.049874	up	1.15853	Rn.57904
		AA996848 UI-R-C0-hg-g-03-0-UI.s1 UI-R-C0 Rattus norvegicus cDNA clone UI-R-C0-hg-g-03-0-UI 3', mRNA sequence [AA996848]	A_44_P374204	0.0342469	down	1.21498	Rn.41724
RGD1562562	similar to RIKEN cDNA B930062P21 gene		A_44_P621708	0.00381973	down	1.09265	Rn.88857
Rpain	RPA interacting protein	Rattus norvegicus RPA interacting protein (Rpain), mRNA [NM_001033060]	A_44_P1044270	0.045487	down	1.25608	Rn.43464
Olr385	olfactory receptor 385	PREDICTED: Rattus norvegicus olfactory receptor 385 (predicted) (Olr385_predicted), mRNA [XM_001061624]	A_44_P510974	0.0203511	down	1.07163
		Rat SH-4 protein gene encoded opposite gonadotropin-releasing hormone (GnRH), complete cds. [M15527]	A_44_P529455	0.0361674	up	1.18269	Rn.159986
			A_44_P731912	0.0046749	down	1.18558
RGD1562266	similar to Hmgb1 protein	PREDICTED: Rattus norvegicus similar to High mobility group protein 1 (HMG-1) (predicted) (RGD1563668_predicted), mRNA [XM_573095]	A_44_P389664	0.0184455	up	1.05061
Atp5sl	ATP5S-like	Rattus norvegicus ATP5S-like (Atp5sl), mRNA [NM_001009705]	A_44_P323550	0.0384569	down	1.27928	Rn.31959
RT1-CE16	RT1 class I, CE16"		A_44_P867246	0.0158626	up	1.9692	chr20_random:37959-37900
		UI-R-C3-tw-c-03-0-UI.r2 UI-R-C3 Rattus norvegicus cDNA clone UI-R-C3-tw-c-03-0-UI 5', mRNA sequence [BF522684]	A_44_P936207	0.00253095	down	1.37243	Rn.205959
		BQ209772 UI-R-DZ1-cog-k-07-0-UI.s1 NCI_CGAP_DZ1 Rattus norvegicus cDNA clone IMAGE:7348449 3', mRNA sequence [BQ209772]	A_44_P534815	0.0338177	down	1.22697	Rn.6276
RGD1559942	similar to hypothetical protein	Rattus norvegicus similar to hypothetical protein (RGD1559942), mRNA [NM_001134590]	A_44_P422367	0.0177531	down	1.2947	Rn.136704
		AI556532 UI-R-C2p-rl-g-01-0-UI.s1 UI-R-C2p Rattus norvegicus cDNA clone UI-R-C2p-rl-g-01-0-UI 3', mRNA sequence [AI556532]	A_44_P276034	0.0470605	up	1.13482	Rn.10731
		PREDICTED: Rattus norvegicus dachshund homolog 2 (Drosophila) (predicted) (Dach2_predicted), mRNA [XM_228458]	A_44_P225105	0.00333901	down	1.13291	Rn.136432
		Rattus norvegicus similar to RIKEN cDNA A930001M12 gene (LOC366358), mRNA [XM_345522]	A_44_P316659	0.00609186	down	2.58538
RGD1307493	similar to membrane protein expressed in epithelial-like lung adenocarcinoma	PREDICTED: Rattus norvegicus similar to membrane protein expressed in epithelial-like lung adenocarcinoma (predicted) (RGD1307493_predicted), mRNA [XM_001080742]	A_44_P960266	0.0284431	down	1.24131
		BF560907 UI-R-E1-fn-d-02-0-UI.r1 UI-R-E1 Rattus norvegicus cDNA clone UI-R-E1-fn-d-02-0-UI 5', mRNA sequence [BF560907]	A_44_P483577	0.0323955	down	1.14314	Rn.32860
Eif5a2	eukaryotic translation initiation factor 5A2	Eukaryotic translation initiation factor 5A isoform II (Fragment). [Source:UniProtKB/TrEMBL;Acc:Q8VHU8] [ENSRNOT00000015779]	A_44_P494259	0.0341681	down	1.52856	Rn.47334
LOC680391	similar to PDZ domain-containing protein 4 (PDZ domain-containing RING finger protein 4-like protein)	PREDICTED: Rattus norvegicus similar to PDZ domain-containing protein 4 (PDZ domain-containing RING finger protein 4-like protein) (LOC300506), mRNA [XR_005718]	A_44_P729266	0.00610302	down	1.31734	Rn.216190
		BM986219 EST531673 Rat gene index, normalized rat, norvegicus Rattus norvegicus cDNA clone RGIAA26 3' end similar to ribosomal phosphoprotein P0, mRNA sequence [BM986219]	A_44_P146465	0.0359494	down	1.14694	Rn.1079
			A_44_P187369	0.0468162	up	1.14624
Ncoa3	nuclear receptor coactivator 3	PREDICTED: Rattus norvegicus nuclear receptor coactivator 3 (Ncoa3), mRNA [XM_215947]	A_44_P791812	0.0466264	up	1.33567	Rn.20691
Smarcc1	SWI/SNF related, matrix associated, actin dependent regulator of chromatin, subfamily c, member 1"		A_43_P19205	0.0427014	up	1.08245	chr8:114564508-114566283
Kcnj8	potassium inwardly-rectifying channel, subfamily J, member 8"		A_43_P11820	0.00816524	up	1.07579	chr4:180144143-180144084
		CA507930 UI-R-FS1-cql-a-23-0-UI.s1 NCI_CGAP_FS1 Rattus norvegicus cDNA clone IMAGE:7364353 3', mRNA sequence [CA507930]	A_44_P205523	0.0372242	down	1.29189	Rn.998
		AW144679 EST295057 Normalized rat embryo, Bento Soares Rattus sp. cDNA clone RGICE77 5' end, mRNA sequence [AW144679]	A_44_P193459	0.00290337	down	1.21889	Rn.4252
Trpa1	transient receptor potential cation channel, subfamily A, member 1"		A_44_P472874	0.0234119	up	1.3541	chr5:3572336-3572395
		AI179012 EST222694 Normalized rat spleen, Bento Soares Rattus sp. cDNA clone RSPCA41 3' end, mRNA sequence [AI179012]	A_44_P205509	0.00356695	up	1.17935	Rn.94978
Rap2ip	Rap2 interacting protein	Rattus norvegicus Rap2 interacting protein (Rap2ip), mRNA [NM_198758]	A_44_P229196	0.00679863	down	1.20311	Rn.102473
Cenpa	centromere protein A	Rattus norvegicus centromere protein A (Cenpa), mRNA [NM_001106711]	A_44_P140514	0.0324537	down	1.45961	Rn.16165
		AA900984 UI-R-E0-dj-e-03-0-UI.s1 UI-R-E0 Rattus norvegicus cDNA clone UI-R-E0-dj-e-03-0-UI 3' similar to gi [AA900984]	A_44_P156079	0.0401402	up	1.8891	Rn.18666
		EST231608 Normalized rat ovary, Bento Soares Rattus sp. cDNA clone ROVCM67 3' end, mRNA sequence [AI235046]	A_44_P125443	0.0271941	up	1.1581	Rn.167613
		AA848648 EST191408 Normalized rat lung, Bento Soares Rattus sp. cDNA clone RLUAC59 5' end, mRNA sequence [AA848648]	A_44_P866732	0.0266466	up	1.2016	Rn.10099
Xrcc2	X-ray repair complementing defective repair in Chinese hamster cells 2	Rattus norvegicus X-ray repair complementing defective repair in Chinese hamster cells 2 (Xrcc2), mRNA [NM_001109215]	A_44_P652180	0.0178292	down	1.10407	Rn.8224
Samd8	sterile alpha motif domain containing 8	Rattus norvegicus sterile alpha motif domain containing 8 (Samd8), mRNA [NM_001012040]	A_43_P17072	0.0211411	down	1.19109	Rn.21195
		Rattus norvegicus chromosome 3, 25 clones, strain BN/SsNHsdMCW RNOR03275191, whole genome shotgun sequence [AABR03025850]	A_44_P444116	0.038738	down	1.8794
RGD1561552	similar to WASP family 1	Rattus norvegicus similar to WASP family 1 (RGD1561552), mRNA [NM_001126271]	A_44_P412729	0.0156719	down	1.57016	Rn.123566
			A_44_P638104	0.0316004	up	1.17955
Syf2	SYF2 homolog, RNA splicing factor (S. cerevisiae)"		A_43_P13183	0.0402361	up	1.27681	chr5:153715326-153715386
RGD1559899	similar to mannose receptor precursor-like isoform 4	PREDICTED: Rattus norvegicus similar to mannose receptor precursor-like isoform 4 (predicted) (RGD1559899_predicted), mRNA [XR_009153]	A_44_P231976	0.0099161	down	1.30879	Rn.201245
		AW252149 UI-R-BJ0-aee-g-09-0-UI.s1 UI-R-BJ0 Rattus norvegicus cDNA clone UI-R-BJ0-aee-g-09-0-UI 3', mRNA sequence [AW252149]	A_44_P159877	0.00596265	down	1.20246	Rn.55564
		BE120758 UI-R-BS1-azs-f-09-0-UI.s1 UI-R-BS1 Rattus norvegicus cDNA clone UI-R-BS1-azs-f-09-0-UI 3', mRNA sequence [BE120758]	A_44_P662912	0.00610302	down	1.31734	Rn.151470
		AI010332 EST204783 Normalized rat lung, Bento Soares Rattus sp. cDNA clone RLUBX30 3' end, mRNA sequence [AI010332]	A_44_P165151	0.0401669	up	1.34858	Rn.164882
Napg	N-ethylmaleimide-sensitive factor attachment protein, gamma"		A_44_P925867	0.0476885	up	1.4014	chr18:59137053-59137112
Olr1504	olfactory receptor 1504	Rattus norvegicus olfactory receptor 1504 (Olr1504), mRNA [NM_001000495]	A_43_P15985	0.0180855	up	1.17812	Rn.113473
Slc7a1	solute carrier family 7 (cationic amino acid transporter, y+ system), member 1"		A_44_P474101	0.0353907	down	1.44868	chr12:7253393-7253451
RGD1563894	similar to mortality factor 4 like 1	PREDICTED: Rattus norvegicus similar to mortality factor 4 like 1 (predicted) (RGD1563894_predicted), mRNA [XR_007402]	A_44_P605826	0.0109974	up	1.6993	Rn.195972
Pcdhb9	protocadherin beta 9	Rattus norvegicus protocadherin beta 9 (Pcdhb9), mRNA [NM_001109390]	A_44_P485271	0.0080021	up	2.39492	Rn.169512
		BE095847 UI-R-BU0-apb-c-05-0-UI.s1 UI-R-BU0 Rattus norvegicus cDNA clone UI-R-BU0-apb-c-05-0-UI 3', mRNA sequence [BE095847]	A_44_P354532	0.0209952	up	1.0735	Rn.71484
		AI030596 UI-R-C0-iu-h-12-0-UI.s1 UI-R-C0 Rattus norvegicus cDNA clone UI-R-C0-iu-h-12-0-UI 3', mRNA sequence [AI030596]	A_44_P408797	0.0314549	down	1.27814	Rn.13415
Lrba	LPS-responsive vesicle trafficking, beach and anchor containing"		A_43_P19673	0.0251536	up	1.06522	chr2:178777449-178777508
Hadha	hydroxyacyl-Coenzyme A dehydrogenase/3-ketoacyl-Coenzyme A thiolase/enoyl-Coenzyme A hydratase (trifunctional protein), alpha subunit"		A_44_P480296	0.0302585	up	1.50783	chr6_random:467174-467737
Rnd2	Rho family GTPase 2	Rattus norvegicus Rho family GTPase 2 (Rnd2), mRNA [NM_001010953]	A_43_P17238	0.029449	up	1.15083	Rn.22162
Prmt2	protein arginine methyltransferase 2	Rattus norvegicus protein arginine methyltransferase 2 (Prmt2), mRNA [NM_001025144]	A_44_P234970	0.0298692	down	1.12456	Rn.145566
		AA875633 UI-R-E0-ct-f-03-0-UI.s1 UI-R-E0 Rattus norvegicus cDNA clone UI-R-E0-ct-f-03-0-UI 3' similar to gi [AA875633]	A_44_P167403	0.0299132	down	1.1281	Rn.13589
Nos1	nitric oxide synthase 1, neuronal"		A_44_P473047	0.032723	up	1.19065	chr12:39810982-39810923
LOC685608	hypothetical protein LOC685608	PREDICTED: Rattus norvegicus hypothetical protein LOC685608 (LOC685608), mRNA [XM_001065355]	A_44_P236820	0.00819143	down	1.27302	Rn.109733
LOC691257	similar to Zinc finger protein 267 (Zinc finger protein HZF2)	PREDICTED: Rattus norvegicus similar to casein kinase 1, gamma 3 (predicted) (RGD1559880_predicted), mRNA [XM_342973]	A_44_P152847	0.0247548	up	1.33754	Rn.212628
		AA955255 UI-R-A1-ej-a-01-0-UI.s1 UI-R-A1 Rattus norvegicus cDNA clone UI-R-A1-ej-a-01-0-UI 3' similar to gi [AA955255]	A_44_P131463	0.0467822	up	1.893	Rn.164956
Zhx3	zinc fingers and homeoboxes 3	Rattus norvegicus zinc fingers and homeoboxes 3 (Zhx3), mRNA [NM_001047097]	A_44_P327997	0.0448059	down	1.08119	Rn.8221
Sec22a	SEC22 vesicle trafficking protein homolog A (S. cerevisiae)	Rattus norvegicus SEC22 vesicle trafficking protein homolog A (S. cerevisiae) (Sec22a), mRNA [NM_057147]	A_43_P13046	0.0438735	up	1.21227	Rn.34191
H2-M3	histocompatibility 2, M region locus 3"		A_43_P12333	0.0311411	up	1.26403	chr20:1412731-1412672
RGD1304878	similar to 2410024A21Rik protein	PREDICTED: Rattus norvegicus similar to 2410024A21Rik protein (RGD1304878), misc RNA [XR_009633]	A_43_P20044	0.0387513	down	1.15139	Rn.20310
LOC365985	similar to adenylate kinase 5 isoform 1	Rattus norvegicus similar to adenylate kinase 5 isoform 1 (LOC365985), mRNA [NM_001108951]	A_44_P297277	0.034855	up	1.07536	Rn.16387
			A_44_P349375	0.0252673	down	1.21484
		BF283511 EST448102 Rat Gene Index, normalized rat, Rattus norvegicus cDNA Rattus norvegicus cDNA clone RGIED32 3' sequence, mRNA sequence [BF283511]	A_44_P183763	0.0392309	down	1.19782
		BE109676 UI-R-BJ1-avq-h-04-0-UI.s1 UI-R-BJ1 Rattus norvegicus cDNA clone UI-R-BJ1-avq-h-04-0-UI 3', mRNA sequence [BE109676]	A_44_P162783	0.0186199	down	1.08518	Rn.12542
		UI-R-E1-fn-g-07-0-UI.r1 UI-R-E1 Rattus norvegicus cDNA clone UI-R-E1-fn-g-07-0-UI 5', mRNA sequence [BF560965]	A_44_P356885	0.0203163	up	1.17079	Rn.211908
		Q46SF6_RALEJ (Q46SF6) Cytochrome-c oxidase , partial (3%) [TC617248]	A_44_P562385	0.0272704	down	1.45539
Znf213	zinc finger protein 213	Rattus norvegicus zinc finger protein 213 (Znf213), mRNA [NM_001105764]	A_44_P547561	0.00726593	down	1.20442	Rn.98676
RGD1565784	RGD1565784	Rattus norvegicus RGD1565784 (RGD1565784), mRNA [NM_001109028]	A_44_P561179	0.00379405	up	1.04162	Rn.20990
			A_44_P685128	0.0376075	down	1.23383
			A_44_P946401	0.0494118	up	1.40976
Cyp2j3	cytochrome P450, family 2, subfamily j, polypeptide 3"		A_44_P242949	0.0370821	up	1.22518	chr5:116755298-116755239
Olr456	olfactory receptor 456	Rattus norvegicus olfactory receptor 456 (Olr456), mRNA [NM_001000687]	A_44_P486989	0.026587	down	1.16287	Rn.142977
			A_44_P733968	0.024215	up	1.58847
Olr847	olfactory receptor 847	Rattus norvegicus olfactory receptor 847 (Olr847), mRNA [NM_001000403]	A_44_P208071	0.0340784	down	1.13174	Rn.143206
LOC365082	similar to RAB1, member RAS oncogene family	PREDICTED: Rattus norvegicus similar to RAB1, member RAS oncogene family (LOC365082), mRNA [XR_005485]	A_44_P333281	0.0351383	up	1.35726	Rn.198017
		Q6NV87_MOUSE (Q6NV87) Hmg20a protein, partial (6%) [TC605158]	A_44_P731802	0.0364727	up	1.62092
Tcfcp2	transcription factor CP2	Rattus norvegicus transcription factor CP2 (Tcfcp2), mRNA [NM_001134714]	A_44_P216292	0.00939538	up	1.19917	Rn.202290
		Rattus norvegicus similar to Elongation factor 1-alpha 1 (EF-1-alpha-1) (Elongation factor 1 A-1) (eEF1A-1) (Elongation factor Tu) (EF-Tu) (LOC290956), mRNA [XM_225097]	A_44_P222566	0.0293963	up	1.3831
Fam154b	family with sequence similarity 154, member B"		A_44_P746860	0.0457877	up	1.53414	chr1:138906306-138906247
		AI717543 UI-R-Y0-acp-e-06-0-UI.s1 UI-R-Y0 Rattus norvegicus cDNA clone UI-R-Y0-acp-e-06-0-UI 3', mRNA sequence [AI717543]	A_44_P514672	0.033787	up	1.17001	Rn.79735
Dnah3	dynein, axonemal, heavy chain 3"		A_44_P290656	0.0101357	down	1.15115	chr1:178237489-178237430
		Rattus norvegicus similar to glyceraldehyde-3-phosphate dehydrogenase (LOC366435), mRNA [XM_345562]	A_44_P377712	0.0112134	down	1.11293
Olr1670	olfactory receptor 1670	Rattus norvegicus olfactory receptor 1670 (Olr1670), mRNA [NM_001000895]	A_44_P409562	0.0268045	down	1.15439	Rn.142701
			A_44_P749588	0.0493132	up	1.14479
Tmem220	transmembrane protein 220	PREDICTED: Rattus norvegicus similar to RIKEN cDNA A730055C05 gene (predicted) (RGD1309576_predicted), mRNA [XM_213341]	A_44_P164132	0.0171298	up	1.37376	Rn.211757
Gpr26	G protein-coupled receptor 26	Rattus norvegicus G protein-coupled receptor 26 (Gpr26), mRNA [NM_138841]	A_44_P352252	0.041274	up	1.13333	Rn.48779
			A_44_P577060	0.0228586	up	1.57176
			A_44_P180854	0.00228865	down	1.17679
Spp1	secreted phosphoprotein 1	Rattus norvegicus secreted phosphoprotein 1 (Spp1), mRNA [NM_012881]	A_44_P491796	0.00685489	up	5.63431	Rn.8871
Hsp90aa1	heat shock protein 90, alpha (cytosolic), class A member 1"		A_44_P114308	0.00960232	up	1.96837	chr6:135416580-135416521
Pgcp	plasma glutamate carboxypeptidase	Rattus norvegicus plasma glutamate carboxypeptidase (Pgcp), mRNA [NM_031640]	A_43_P12622	0.0356006	up	1.37015	Rn.17112
Lgals12	lectin, galactoside-binding, soluble, 12"		A_44_P513333	0.0117765	down	1.33045	chr1:210335282-210335223
		CB548039 AMGNNUC:NRPI3-00107-A2-A W Rat pituitary (10477) Rattus norvegicus cDNA clone nrpi3-00107-a2 5', mRNA sequence [CB548039]	A_43_P17985	0.0170706	down	1.1059	Rn.164602
Tnfsf14	tumor necrosis factor (ligand) superfamily, member 14"		A_44_P232084	0.0381082	down	1.1969	chrUn:64497007-64495238
Itpr2	inositol 1,4,5-triphosphate receptor, type 2"		A_42_P757500	0.028201	down	1.28557	chr4:183678383-183678324
Spred1	sprouty-related, EVH1 domain containing 1"		A_44_P134313	0.017642	up	1.43407	chr3:103248100-103248159
Brd2	bromodomain containing 2	Rattus norvegicus bromodomain containing 2 (Brd2), mRNA [NM_212495]	A_42_P558503	0.0238446	up	1.16231	Rn.98146
Pptc7	PTC7 protein phosphatase homolog (S. cerevisiae)	Rattus norvegicus PTC7 protein phosphatase homolog (S. cerevisiae) (Pptc7), mRNA [NM_001107141]	A_44_P102708	0.0403522	up	1.45663	Rn.7549
Efha1	EF-hand domain family, member A1"		A_42_P831552	0.0410209	up	1.3141	chr15:36962124-36962065
Gja6	gap junction protein, alpha 6"		A_43_P15538	0.0335442	up	1.05915	chrX:55121505-55121564
Txn1	thioredoxin 1	EST445946 Rat Gene Index, normalized rat, Rattus norvegicus cDNA Rattus norvegicus cDNA clone RGIAD62 3' sequence, mRNA sequence [BF281355]	A_44_P559392	0.0289082	down	1.27151	Rn.29777
Six6os1	Six6 opposite strand transcript 1	PREDICTED: Rattus norvegicus similar to RIKEN cDNA 4930447C04 (predicted) (RGD1559456_predicted), mRNA [XM_001077640]	A_43_P19075	0.0156132	down	1.06853	Rn.159035
Olr666	olfactory receptor 666	Rattus norvegicus olfactory receptor 666 (Olr666), mRNA [NM_001000924]	A_44_P172724	0.0135707	down	1.11293	Rn.142835
		AI535514 UI-R-C3-sq-d-09-0-UI.s1 UI-R-C3 Rattus norvegicus cDNA clone UI-R-C3-sq-d-09-0-UI 3', mRNA sequence [AI535514]	A_44_P486327	0.0434297	down	1.08768	Rn.22366
Wnt5b	wingless-type MMTV integration site family, member 5B"		A_44_P945616	0.0359403	down	1.11914	chr4:155747876-155747817
Ube2d2	ubiquitin-conjugating enzyme E2D 2	Rattus norvegicus ubiquitin-conjugating enzyme E2D 2 (Ube2d2), mRNA [NM_001037292]	A_44_P489474	0.0443838	up	1.10297	Rn.7390
			A_44_P655753	0.0156087	up	1.23107
		AI232365 EST229053 Normalized rat kidney, Bento Soares Rattus sp. cDNA clone RKICA76 3' end, mRNA sequence [AI232365]	A_44_P112841	0.0361473	down	1.38361	Rn.8814
Oraov1	oral cancer overexpressed 1	Rattus norvegicus oral cancer overexpressed 1 (Oraov1), mRNA [NM_001107565]	A_44_P208421	6.60065e-05	up	1.10549	Rn.15258
			A_43_P14511	0.00147207	up	1.43629
		AW144417 EST294713 Normalized rat ovary, Bento Soares Rattus sp. cDNA clone RGICT08 5' end, mRNA sequence [AW144417]	A_44_P618980	0.00990015	up	1.22077	Rn.167696
Gata6	GATA binding protein 6	Rattus norvegicus GATA binding protein 6 (Gata6), mRNA [NM_019185]	A_44_P445300	0.0328111	up	1.41607	Rn.8701
		AI059986 UI-R-C1-la-h-06-0-UI.s1 UI-R-C1 Rattus norvegicus cDNA clone UI-R-C1-la-h-06-0-UI 3', mRNA sequence [AI059986]	A_44_P301219	0.00949276	up	1.42244	Rn.19335
Tbx18	T-box18	Rattus norvegicus T-box18 (Tbx18), mRNA [NM_001108173]	A_42_P559462	0.00478265	up	1.74784	Rn.161921
		DPOLL_RAT (Q5RKI3) DNA polymerase lambda (Pol Lambda) , partial (32%) [TC630990]	A_44_P520403	0.0181867	down	1.0747
		Rattus norvegicus similar to T cell receptor V-alpha J-alpha (LOC290105), mRNA [XM_224059]	A_44_P428980	0.0379951	down	1.17828
		BE117874 UI-R-BS1-azm-a-06-0-UI.s1 UI-R-BS1 Rattus norvegicus cDNA clone UI-R-BS1-azm-a-06-0-UI 3', mRNA sequence [BE117874]	A_44_P103381	0.00836593	up	1.14118	Rn.164897
Fbxo33	F-box protein 33	Rattus norvegicus F-box protein 33 (Fbxo33), mRNA [NM_001108023]	A_44_P451392	0.0293994	up	1.32092	Rn.220421
LOC683519	similar to ribosomal protein, mitochondrial, S22"		A_44_P252345	0.048412	up	1.31055
			A_44_P791395	0.0299752	down	1.19892
Dock11	dedicator of cytokinesis 11	Dedicator of cytokinesis 11 (Fragment). [Source:UniProtKB/TrEMBL;Acc:Q2PS60] [ENSRNOT00000032275]	A_44_P361755	0.0114702	down	1.4605	Rn.22563
Olr1163	olfactory receptor 1163	Rattus norvegicus olfactory receptor 1163 (Olr1163), mRNA [NM_001000869]	A_44_P231351	0.00334429	up	1.04256	Rn.143586
			A_44_P520933	0.0111108	down	1.0582
		BF395615 UI-R-CM0-bjp-b-03-0-UI.s1 UI-R-CM0 Rattus norvegicus cDNA clone UI-R-CM0-bjp-b-03-0-UI 3', mRNA sequence [BF395615]	A_44_P480991	0.0037444	down	1.08858	Rn.101734
LOC499541	LRRGT00045	Rattus norvegicus LRRGT00045 (LOC499541), mRNA [NM_001047942]	A_44_P374794	0.0201969	down	1.23651	Rn.115979
Pdhx	pyruvate dehydrogenase complex, component X"		A_44_P247849	0.0303371	up	1.53592	chr3:88259496-88253276
		CB544265 AMGNNUC:NRDG1-00207-C10-A nrdg1 (10855) Rattus norvegicus cDNA clone nrdg1-00207-c10 5', mRNA sequence [CB544265]	A_43_P10548	0.0195676	down	2.39671	Rn.12112
		AA964361 UI-R-C0-gw-g-02-0-UI.s1 UI-R-C0 Rattus norvegicus cDNA clone UI-R-C0-gw-g-02-0-UI 3', mRNA sequence [AA964361]	A_44_P465303	0.0318637	up	1.36513
Bche	butyrylcholinesterase	Rattus norvegicus butyrylcholinesterase (Bche), mRNA [NM_022942]	A_43_P12345	0.0341651	up	1.62839	Rn.48791
Slitrk1	SLIT and NTRK-like family, member 1"		A_44_P292980	0.0224795	down	1.13889	chr15:93207210-93207151
			A_44_P279046	0.0329028	down	1.23254
Ptprt	protein tyrosine phosphatase, receptor type, T"		A_44_P187512	0.041588	up	1.19966	chr3:152445200-152432994
Arfgef2	ADP-ribosylation factor guanine nucleotide-exchange factor 2 (brefeldin A-inhibited)	Rattus norvegicus ADP-ribosylation factor guanine nucleotide-exchange factor 2 (brefeldin A-inhibited) (Arfgef2), mRNA [NM_181083]	A_44_P1012529	0.0399287	up	1.08003	Rn.161866
RGD1564571	similar to DC-SIGN	PREDICTED: Rattus norvegicus similar to DC-SIGN (predicted) (RGD1564571_predicted), mRNA [XM_221808]	A_44_P349209	0.034737	up	1.24576
Napsa	napsin A aspartic peptidase	Rattus norvegicus napsin A aspartic peptidase (Napsa), mRNA [NM_031670]	A_42_P738549	0.0128081	down	1.44671	Rn.17097
Col1a1	collagen, type I, alpha 1"		A_44_P419137	0.0137479	down	1.15211	chr10:083637903-083637962
RGD1307897	similar to RIKEN cDNA C730036B14 gene	Rattus norvegicus similar to RIKEN cDNA C730036B14 gene, mRNA (cDNA clone IMAGE:7315080), complete cds. [BC091339]	A_44_P229731	0.0259034	up	1.26885	Rn.84253
		AGENCOURT_28448085 NIH_MGC_247 Rattus norvegicus cDNA clone IMAGE:7324506 5', mRNA sequence [CO572285]	A_44_P681836	0.0111113	up	1.3651	Rn.30566
Abca15	ATP-binding cassette, sub-family A (ABC1), member 15"		A_44_P163628	0.0390351	down	1.06624	chr1:179021991-179024763
		UI-R-E1-fw-d-06-0-UI.s1 UI-R-E1 Rattus norvegicus cDNA clone UI-R-E1-fw-d-06-0-UI 3', mRNA sequence [AA957486]	A_44_P130036	0.0391559	down	1.48369	Rn.165121
		Q31QT2_SYNP7 (Q31QT2) Zinc metalloprotease, partial (6%) [TC616359]	A_44_P934594	0.00894519	down	1.58301
Olr39	olfactory receptor 39	Rattus norvegicus olfactory receptor 39 (Olr39), mRNA [NM_001000128]	A_44_P146753	0.0332382	down	1.06014	Rn.141935
		AI411329 EST239623 Normalized rat kidney, Bento Soares Rattus sp. cDNA clone RKIEU56 3' end, mRNA sequence [AI411329]	A_44_P106424	0.0170655	down	1.39479	Rn.127772
Gcsh	glycine cleavage system protein H (aminomethyl carrier)	Rattus norvegicus glycine cleavage system protein H (aminomethyl carrier) (Gcsh), mRNA [NM_133598]	A_44_P555418	0.0410491	up	1.17695	Rn.98456
RGD1563106	similar to novel protein	Rattus norvegicus similar to novel protein (RGD1563106), mRNA [NM_001107010]	A_44_P324124	0.00364783	down	1.12936	Rn.203763
Wnt2	wingless-type MMTV integration site family member 2	Protein Wnt. [Source:UniProtKB/TrEMBL;Acc:Q2IBD1] [ENSRNOT00000010427]	A_44_P358444	0.0136431	down	1.2363	Rn.203764
		Q4S355_TETNG (Q4S355) Chromosome 4 SCAF14752, whole genome shotgun sequence, partial (6%) [TC598118]	A_44_P702390	0.0416916	down	1.15463
Enthd1	ENTH domain containing 1	Rattus norvegicus ENTH domain containing 1 (Enthd1), mRNA [NM_001135913]	A_44_P192530	0.0447072	down	1.15165	Rn.201701
Olr677	olfactory receptor 677	Rattus norvegicus olfactory receptor 677 (Olr677), mRNA [NM_001001062]	A_44_P167999	0.00157372	up	1.09099	Rn.142826
Dhx40	DEAH (Asp-Glu-Ala-His) box polypeptide 40	Rattus norvegicus DEAH (Asp-Glu-Ala-His) box polypeptide 40 (Dhx40), mRNA [NM_001005873]	A_44_P1055584	0.00395744	up	1.19082	Rn.29182
Tubb2b	tubulin, beta 2b"		A_44_P187166	0.0145044	down	1.11639	chr17:37090616-37090675
Ppm1l	protein phosphatase 1 (formerly 2C)-like	Rattus norvegicus protein phosphatase 1 (formerly 2C)-like (Ppm1l), mRNA [NM_001107681]	A_42_P489817	0.0236973	up	1.39736	Rn.133275
Olr446	olfactory receptor 446	Rattus norvegicus olfactory receptor 446 (Olr446), mRNA [NM_001001050]	A_44_P139770	0.029462	down	1.10267	Rn.142984
			A_44_P763205	0.0412501	down	1.13805
		Q6PD06_MOUSE (Q6PD06) Cdc23 protein, partial (61%) [TC617461]	A_44_P606573	0.0263056	up	1.05169
Tmprss6	transmembrane protease, serine 6"		A_43_P20937	0.0382359	down	1.18769	chr7:116392290-116392231
Nlrx1	NLR family member X1	Rattus norvegicus NLR family member X1 (Nlrx1), mRNA [NM_001025010]	A_42_P527738	0.0495628	up	1.16866	Rn.12444
		AGENCOURT_12544370 NICHD_Rr_Pit1 Rattus norvegicus cDNA clone IMAGE:6921881 5', mRNA sequence [CB567832]	A_44_P690078	0.00934601	down	1.06713	Rn.34755
		Rattus norvegicus similar to Small nuclear ribonucleoprotein associated protein N (snRNP-N) (Sm protein N) (Sm-N) (SmN) (Sm-D) (Tissue-specific splicing protein) (LOC290428), mRNA [XM_224436]	A_44_P400718	0.0104589	up	1.39818
		AI009119 EST203570 Normalized rat embryo, Bento Soares Rattus sp. cDNA clone REMBI92 3' end, mRNA sequence [AI009119]	A_44_P284625	0.0473979	down	1.05594	Rn.14087
Orc2l	origin recognition complex, subunit 2-like (yeast)"		A_44_P124294	0.0142539	up	1.09248	chr9:57131343-57131284
Masp1	mannan-binding lectin serine peptidase 1	Rattus norvegicus mannan-binding lectin serine peptidase 1 (Masp1), mRNA [NM_022257]	A_44_P189476	0.0348588	up	1.17334	Rn.203236
		AA858471 UI-R-E0-bo-a-02-0-UI.s1 UI-R-E0 Rattus norvegicus cDNA clone UI-R-E0-bo-a-02-0-UI 3' similar to gb [AA858471]	A_44_P329239	0.0111395	down	1.35317	Rn.2743
		BE108137 UI-R-CA0-axa-g-12-0-UI.s1 UI-R-CA0 Rattus norvegicus cDNA clone UI-R-CA0-axa-g-12-0-UI 3', mRNA sequence [BE108137]	A_44_P237194	0.00732197	down	1.12447	Rn.98420
		BI284190 UI-R-CX0s-ccn-c-07-0-UI.s1 UI-R-CX0s Rattus norvegicus cDNA clone UI-R-CX0s-ccn-c-07-0-UI 3', mRNA sequence [BI284190]	A_44_P104435	0.0172828	up	1.18811	Rn.198892
Zfp53	zinc finger protein 53	Rattus norvegicus zinc finger protein 53 (Zfp53), mRNA [NM_001107468]	A_44_P271842	0.0454674	up	1.36728	Rn.198476
			A_44_P131177	0.0321044	up	1.21872
Il1a	interleukin 1 alpha	Rattus norvegicus interleukin 1 alpha (Il1a), mRNA [NM_017019]	A_44_P294838	0.00781807	down	1.10327	Rn.12300
Brunol5	bruno-like 5, RNA binding protein (Drosophila)"		A_43_P21008	0.00624252	down	1.20218	chr7:9727812-9727949
		AW917074 EST348378 Rat gene index, normalized rat, norvegicus, Bento Soares Rattus norvegicus cDNA clone RGIDY95 5' end, mRNA sequence [AW917074]	A_44_P756922	0.0195546	up	1.04993
		UI-R-A1-ef-b-04-0-UI.s1 UI-R-A1 Rattus norvegicus cDNA clone UI-R-A1-ef-b-04-0-UI 3', mRNA sequence [AI111899]	A_44_P286661	0.0180932	down	1.321	Rn.202671
Mlx	MAX-like protein X	Rattus norvegicus MAX-like protein X (Mlx), mRNA [NM_001034112]	A_44_P391986	0.0017671	up	1.10417	Rn.16914
			A_44_P700638	0.0387924	down	1.29434
		Rattus norvegicus chromosome 17, 12 clones, strain BN/SsNHsdMCW RNOR03247372, whole genome shotgun sequence [AABR03104805]	A_44_P386085	0.0144586	down	1.13677	Rn.141300
			A_44_P154539	0.0123364	down	1.62159
Hpgd	hydroxyprostaglandin dehydrogenase 15 (NAD)	Rattus norvegicus hydroxyprostaglandin dehydrogenase 15 (NAD) (Hpgd), mRNA [NM_024390]	A_43_P11278	0.0183117	up	1.11719	Rn.6386
			A_44_P736002	0.036877	down	1.14101
		PREDICTED: Rattus norvegicus similar to novel protein similar to esterases (predicted) (RGD1563257_predicted), mRNA [XM_001074227]	A_44_P347273	0.0397308	down	1.06932
LOC680369	similar to poly(rC) binding protein 2	PREDICTED: Rattus norvegicus similar to poly(rC) binding protein 2 (predicted) (LOC680369), mRNA [XR_005728]	A_44_P883709	0.0224134	up	1.53698	Rn.207024
		Rattus norvegicus amyloid beta precursor protein (App) gene, partial cds [AY011335]	A_44_P1054883	0.0262298	up	1.35081	Rn.2104
			A_44_P719679	0.0463975	up	1.0885
Gprasp2	G protein-coupled receptor associated sorting protein 2	PREDICTED: Rattus norvegicus similar to hypothetical protein (predicted) (RGD1561019_predicted), mRNA [XM_228821]	A_44_P534557	0.0276818	up	1.3093	Rn.101194
Odz3	odz, odd Oz/ten-m homolog 3 (Drosophila)"		A_43_P10162	0.0450166	up	1.37493	chr16:47130938-47130997
		Rattus norvegicus similar to diphosphate dimethylallyl diphosphate isomerase 2 (LOC291278), mRNA [XM_225511]	A_44_P431377	0.0278217	down	1.0991
Cry1	cryptochrome 1 (photolyase-like)	Rattus norvegicus cryptochrome 1 (photolyase-like) (Cry1), mRNA [NM_198750]	A_44_P374708	0.0300253	down	1.12007	Rn.43646
Ube2a	ubiquitin-conjugating enzyme E2A, RAD6 homolog (S. cerevisiae)"		A_43_P10604	0.0244312	down	1.21441	chrX:7982780-7982721
			A_44_P728535	0.0164939	up	1.26203
		BQ190829 UI-R-DZ0-cmx-n-11-0-UI.s1 NCI_CGAP_DZ0 Rattus norvegicus cDNA clone IMAGE:7339693 3', mRNA sequence [BQ190829]	A_44_P432843	0.000108285	down	1.27384	Rn.24233
		Q9LKM4_WHEAT (Q9LKM4) Cold-responsive protein, partial (30%) [TC592787]	A_44_P764517	0.0470026	up	1.27402
Rspo2	R-spondin 2 homolog (Xenopus laevis)	Rattus norvegicus R-spondin2 mRNA, complete cds. [AB232173]	A_44_P610634	0.0474552	up	1.27872	Rn.152874
		MMYAP65 M.musculus YAP65 mRNA [X80508]	A_44_P299214	0.000272835	up	1.4486
		BQ191076 UI-R-DZ0-cmy-e-19-0-UI.s1 NCI_CGAP_DZ0 Rattus norvegicus cDNA clone IMAGE:7339869 3', mRNA sequence [BQ191076]	A_44_P507822	0.00529012	up	1.18615	Rn.9392
		AI176621 EST220210 Normalized rat ovary, Bento Soares Rattus sp. cDNA clone ROVBU65 3' end, mRNA sequence [AI176621]	A_44_P263850	0.00866008	down	1.49115	Rn.35934
Hmgb1	high mobility group box 1	Rattus norvegicus high mobility group box 1 (Hmgb1), mRNA [NM_012963]	A_43_P15527	0.0113612	up	1.21267	Rn.144565
C1ql1	complement component 1, q subcomponent-like 1"		A_44_P208936	0.0102075	down	1.32278	chr10:92115862-92115803
		BQ782596 UI-R-FF0-cpk-n-03-0-UI.s1 NCI_CGAP_FF0 Rattus norvegicus cDNA clone UI-R-FF0-cpk-n-03-0-UI 3', mRNA sequence [BQ782596]	A_44_P267824	0.0446121	down	1.13687	Rn.8272
		UI-R-C3-sh-b-09-0-UI.s1 UI-R-C3 Rattus norvegicus cDNA clone UI-R-C3-sh-b-09-0-UI 3', mRNA sequence [AI511420]	A_44_P939814	0.00801769	up	1.1584	Rn.153947
		AW920715 EST352019 Rat gene index, normalized rat, norvegicus, Bento Soares Rattus norvegicus cDNA clone RGIHB41 5' end, mRNA sequence [AW920715]	A_44_P282443	0.0133682	up	1.93162	Rn.205487
		AA925933 UI-R-A1-es-h-10-0-UI.s1 UI-R-A1 Rattus norvegicus cDNA clone UI-R-A1-es-h-10-0-UI 3' similar to gi [AA925933]	A_44_P411466	0.024798	down	1.19783	Rn.11347
Dbr1	debranching enzyme homolog 1 (S. cerevisiae)	PREDICTED: Rattus norvegicus similar to debranching enzyme homolog 1, transcript variant 1 (LOC683696), mRNA [XM_001066469]	A_43_P22858	0.00789842	up	1.19604
Usp25	ubiquitin specific peptidase 25	Rattus norvegicus ubiquitin specific peptidase 25 (Usp25), mRNA [NM_001107114]	A_43_P21690	0.0270425	down	1.16979	Rn.23509
		BF282495 EST447086 Rat Gene Index, normalized rat, Rattus norvegicus cDNA Rattus norvegicus cDNA clone RGIDO08 3' sequence, mRNA sequence [BF282495]	A_44_P548976	0.00610302	down	1.31734	Rn.8484
Cltc	clathrin, heavy chain (Hc)"		A_43_P12011	0.0208604	up	1.12375	chr10:74976972-74976913
			A_44_P624280	0.0299446	up	2.5193
		BF551572 UI-R-C0-it-h-08-0-UI.r1 UI-R-C0 Rattus norvegicus cDNA clone UI-R-C0-it-h-08-0-UI 5', mRNA sequence [BF551572]	A_44_P469517	0.0439726	up	1.07966	Rn.18432
Olr436	olfactory receptor 436	Rattus norvegicus olfactory receptor 436 (Olr436), mRNA [NM_001000688]	A_44_P194012	0.0170842	down	1.49666	Rn.142992
		AA901144 UI-R-A1-dv-d-01-0-UI.s1 UI-R-A1 Rattus norvegicus cDNA clone UI-R-A1-dv-d-01-0-UI 3' similar to gi [AA901144]	A_44_P376020	0.000831165	down	1.55853
Aplp2	amyloid beta (A4) precursor-like protein 2	PREDICTED: Rattus norvegicus amyloid beta (A4) precursor-like protein 2 (Aplp2), mRNA [XM_343513]	A_42_P502759	0.0116983	up	1.34237	Rn.1423
Zdhhc13	zinc finger, DHHC-type containing 13"		A_44_P250476	0.00762721	up	1.24572	chr1:98596581-98598972
Adora2b	adenosine A2B receptor	Rattus norvegicus adenosine A2B receptor (Adora2b), mRNA [NM_017161]	A_44_P1011716	0.0419405	up	1.11275	Rn.89544
			A_44_P870133	0.0100201	down	1.44448
Irf3	interferon regulatory factor 3	Rattus norvegicus interferon regulatory factor 3 (Irf3), mRNA [NM_001006969]	A_44_P1003825	0.031192	up	1.22214	Rn.1499
LOC690206	hypothetical protein LOC690206	Rattus norvegicus hypothetical protein LOC690206 (LOC690206), mRNA [NM_001109567]	A_44_P837276	0.0098149	down	1.36889	Rn.126025
Npepl1	aminopeptidase-like 1	Rattus norvegicus aminopeptidase-like 1 (Npepl1), mRNA [NM_001107806]	A_44_P213214	0.0250883	up	1.17596	Rn.8518
		UI-R-BO0-ahz-g-05-0-UI.s1 UI-R-BO0 Rattus norvegicus cDNA clone UI-R-BO0-ahz-g-05-0-UI 3', mRNA sequence [AW524553]	A_44_P582449	0.00283697	up	1.28149	Rn.147998
Hmgb3	high mobility group box 3	PREDICTED: Rattus norvegicus similar to high mobility group protein homolog HMG4 (predicted) (RGD1564407_predicted), mRNA [XM_223440]	A_44_P239095	0.00600383	up	1.10019	Rn.203482
			A_44_P640503	0.0324258	down	1.19162
RGD1565545	similar to zinc finger protein ZFP	Rattus norvegicus similar to zinc finger protein ZFP (RGD1565545), mRNA [NM_001134544]	A_44_P1050554	0.0242355	down	1.21808	Rn.198482
Unc50	unc-50 homolog (C. elegans)	Rattus norvegicus unc-50 homolog (C. elegans) (Unc50), mRNA [NM_138919]	A_42_P471507	0.0271106	up	1.09092	Rn.3446
RGD1311676	similar to RIKEN cDNA 1700008P20	Rattus norvegicus similar to RIKEN cDNA 1700008P20 (RGD1311676), mRNA [NM_001106233]	A_44_P208351	0.000983727	down	1.13988	Rn.90261
Etv1	ets variant 1	Rattus norvegicus ets variant 1 (Etv1), mRNA [NM_001108709]	A_44_P315649	0.0226465	up	1.35101	Rn.76536
		BE100986 UI-R-BJ1-aug-g-08-0-UI.s1 UI-R-BJ1 Rattus norvegicus cDNA clone UI-R-BJ1-aug-g-08-0-UI 3', mRNA sequence [BE100986]	A_44_P474651	0.0370308	up	2.26946	Rn.26694
Usp18	ubiquitin specific peptidase 18	Rattus norvegicus ubiquitin specific peptidase 18 (Usp18), mRNA [NM_001014058]	A_44_P284200	0.0270784	up	1.10108	Rn.161758
RGD1310392	similar to RIKEN cDNA B230209C24 gene	Rattus norvegicus similar to RIKEN cDNA B230209C24 gene (RGD1310392), mRNA [NM_001108792]	A_44_P940553	0.022746	up	1.33414	Rn.214678
			A_44_P591772	0.034655	up	1.19358
		AW915986 EST347290 Rat gene index, normalized rat, norvegicus, Bento Soares Rattus norvegicus cDNA clone RGIDE55 5' end, mRNA sequence [AW915986]	A_44_P241321	0.000880292	down	1.21486
		PREDICTED: Rattus norvegicus similar to Aldose reductase (AR) (Aldehyde reductase) (LOC307650), mRNA [XR_006586]	A_44_P387025	0.0380017	up	1.26652	Rn.196954
Emcn	endomucin	Rattus norvegicus endomucin (Emcn), mRNA [NM_001004228]	A_44_P240274	0.0258525	down	1.23409	Rn.8542
Cyp4b1	cytochrome P450, family 4, subfamily b, polypeptide 1"		A_44_P360486	0.00975588	up	1.2058	chr5:135922305-135922246
RGD1303066	similar to RIKEN cDNA 2610110G12	Rattus norvegicus cDNA clone IMAGE:7375759, with apparent retained intron [BC088258]	A_44_P654250	0.0107856	up	1.0986	Rn.136935
		BQ196451 UI-R-EA0-ckw-m-21-0-UI.s1 UI-R-EA0 Rattus norvegicus cDNA clone UI-R-EA0-ckw-m-21-0-UI 3', mRNA sequence [BQ196451]	A_44_P364952	0.0232273	down	1.0674	Rn.103402
		AA946313 EST201812 Normalized rat lung, Bento Soares Rattus sp. cDNA clone RLUBD62 3' end, mRNA sequence [AA946313]	A_44_P393007	0.00428922	down	1.61814	Rn.98989
		AI231566 EST228254 Normalized rat embryo, Bento Soares Rattus sp. cDNA clone REMDM14 3' end, mRNA sequence [AI231566]	A_44_P218731	0.0139438	down	1.26578	Rn.4210
Cd151	CD151 molecule (Raph blood group)	Rattus norvegicus CD151 molecule (Raph blood group) (Cd151), mRNA [NM_022523]	A_44_P271720	0.00175435	up	1.23791	Rn.1465
Mterf	mitochondrial transcription termination factor	Rattus norvegicus mitochondrial transcription termination factor (Mterf), nuclear gene encoding mitochondrial protein, mRNA [NM_053499]	A_44_P367807	0.0449403	up	1.33484	Rn.64629
Sfxn1	sideroflexin 1	Rattus norvegicus sideroflexin 1 (Sfxn1), mRNA [NM_001012213]	A_44_P320955	0.022464	down	1.33786	Rn.115752
		Dynein-like protein 11 (Fragment). [Source:UniProtKB/TrEMBL;Acc:Q63162] [ENSRNOT00000007233]	A_44_P262971	0.0269634	up	1.56367	Rn.207961
			A_44_P337936	0.0197648	down	1.26215
Serpina6	serine (or cysteine) peptidase inhibitor, clade A, member 6"		A_44_P121347	0.0198765	down	1.84831	chr6:127918816-127918757
Ppp1r3d	protein phosphatase 1, regulatory subunit 3D"		A_44_P749192	0.0293257	down	1.04921	chr3:167507269-167507210
Hist1h4b	histone cluster 1, H4b"		A_44_P552794	0.0283545	down	1.88507	chr17:50113770-50113829
		AI639448 rx02772s Rat mixed-tissue library Rattus norvegicus cDNA clone rx02772 3', mRNA sequence [AI639448]	A_44_P971970	0.0336642	down	1.16113	Rn.38451
		AA964529 UI-R-C0-gv-h-01-0-UI.s1 UI-R-C0 Rattus norvegicus cDNA clone UI-R-C0-gv-h-01-0-UI 3', mRNA sequence [AA964529]	A_44_P479783	0.015155	down	1.26631	Rn.11832
Gfra3	GDNF family receptor alpha 3	Rattus norvegicus GDNF family receptor alpha 3 (Gfra3), mRNA [NM_053398]	A_44_P151675	0.0184644	up	1.11361	Rn.15499
Nsfl1c	NSFL1 (p97) cofactor (p47)	Rattus norvegicus NSFL1 (p97) cofactor (p47) (Nsfl1c), mRNA [NM_031981]	A_44_P332168	0.0175031	up	1.32932	Rn.2771
		Rattus norvegicus similar to CDNA sequence BC036304 (LOC365570), mRNA [XM_345105]	A_44_P349569	0.00994743	down	1.22684
Tmed7	transmembrane emp24 protein transport domain containing 7	Rattus norvegicus transmembrane emp24 protein transport domain containing 7 (Tmed7), mRNA [NM_001105758]	A_44_P519312	0.0457082	up	1.5489	Rn.67055
		ribosomal protein S23 (Rps23), mRNA [Source:RefSeq_dna;Acc:NM_078617] [ENSRNOT00000047247]	A_44_P874109	0.0156122	down	1.07891	Rn.2139
Pldn	pallidin homolog (mouse)	Rattus norvegicus pallidin homolog (mouse) (Pldn), mRNA [NM_001025714]	A_44_P122372	0.0193966	up	1.16174	Rn.139756
RGD1311501	similar to chromosome 9 open reading frame 7	Rattus norvegicus similar to chromosome 9 open reading frame 7 (RGD1311501), mRNA [NM_001106561]	A_42_P624493	0.0141851	down	1.16659	Rn.105899
Hmgn2	high mobility group nucleosomal binding domain 2	Rattus norvegicus high mobility group nucleosomal binding domain 2 (Hmgn2), mRNA [NM_001025624]	A_42_P751001	0.0308148	up	1.29597	Rn.3517
		Rattus norvegicus nitrate-tolerant vascular factor-1 (Ntvf1) mRNA, partial sequence [AF493157]	A_43_P16178	0.0129991	down	1.04114	Rn.214206
LOC299282	Serine protease inhibitor	Rattus norvegicus Serine protease inhibitor (LOC299282), mRNA [NM_182474]	A_44_P262065	0.0321036	down	1.15611	Rn.97597
		Q954B4_9MAXI (Q954B4) Cytochrome oxidase subunit I (Fragment), partial (7%) [TC616972]	A_44_P609371	0.0340765	down	1.10493
Stat1	signal transducer and activator of transcription 1	Rattus norvegicus signal transducer and activator of transcription 1 (Stat1), transcript variant alpha, mRNA [NM_032612]	A_43_P12727	0.0277735	up	1.38683	Rn.33229
		Rattus norvegicus similar to cell surface protein (LOC292461), mRNA [XM_218058]	A_44_P311518	0.0205459	down	1.18334
Lxn	latexin	Rattus norvegicus latexin (Lxn), mRNA [NM_031655]	A_43_P12624	0.0367991	up	1.20693	Rn.11404
		Q9RC26_BACSY (Q9RC26) MrsG protein, partial (5%) [TC649810]	A_44_P777974	0.00295042	up	1.32806
Nupr1	nuclear protein 1	Rattus norvegicus nuclear protein 1 (Nupr1), mRNA [NM_053611]	A_42_P812008	0.0354256	up	2.01889	Rn.11182
			A_44_P777795	0.0450708	up	1.0878
Chad	chondroadherin	Rattus norvegicus chondroadherin (Chad), mRNA [NM_019164]	A_43_P11958	0.00690098	down	1.2476	Rn.9899
			A_44_P888044	0.0256447	up	1.13365
Sema4g	sema domain, immunoglobulin domain (Ig), transmembrane domain (TM) and short cytoplasmic domain, (semaphorin) 4G"		A_43_P14045	0.0284127	up	1.08887	chr1:250068834-250068893
		AMGNNUC:NRHY4-00112-H10-B W Rat hypothalamus (10464) Rattus norvegicus cDNA clone nrhy4-00112-h10 3', mRNA sequence [CB782002]	A_44_P1044601	0.0238711	up	1.38765	Rn.167911
		AA998814 UI-R-C0-ii-b-06-0-UI.s1 UI-R-C0 Rattus norvegicus cDNA clone UI-R-C0-ii-b-06-0-UI 3', mRNA sequence [AA998814]	A_44_P834352	0.0193288	down	1.56706	Rn.13202
Olr1700	olfactory receptor 1700	Rattus norvegicus olfactory receptor 1700 (Olr1700), mRNA [NM_001001113]	A_44_P412032	0.011976	down	1.07121	Rn.142679
Fbxo38	F-box protein 38	Rattus norvegicus F-box protein 38 (Fbxo38), mRNA [NM_001107385]	A_43_P10934	0.0176211	up	1.27645	Rn.13347
Vkorc1	vitamin K epoxide reductase complex, subunit 1"		A_44_P463345	0.00151687	down	1.23348	chr1:187176890-187176949
LOC287010	thiol-specific antioxidant-like protein	AF053093 Rattus norvegicus thiol-specific antioxidant-like protein mRNA, partial cds [AF053093]	A_44_P257528	0.0229616	down	1.30103
Olr807	olfactory receptor 807	Rattus norvegicus olfactory receptor 807 (Olr807), mRNA [NM_001000851]	A_44_P487003	0.0310838	down	1.22756	Rn.143115
		UI-R-BS2-bet-e-02-0-UI.s1 UI-R-BS2 Rattus norvegicus cDNA clone UI-R-BS2-bet-e-02-0-UI 3', mRNA sequence [BF408882]	A_44_P412987	0.0473558	down	1.57055	Rn.146794
		BI285540 UI-R-CW0s-ccb-c-12-0-UI.s1 UI-R-CW0s Rattus norvegicus cDNA clone UI-R-CW0s-ccb-c-12-0-UI 3', mRNA sequence [BI285540]	A_44_P586370	0.0336662	down	1.08074
Agbl2	ATP/GTP binding protein-like 2	Rattus norvegicus similar to CG32627-PB (LOC366124), mRNA [XM_345401]	A_44_P234279	0.0180212	up	1.04589	Rn.111990
Hoxc9	homeobox C9	PREDICTED: Rattus norvegicus homeo box C8 (mapped) (Hoxc8_mapped), mRNA [XM_347335]	A_42_P692008	0.0318126	up	1.404	Rn.101733
			A_44_P328609	0.00938665	down	1.08784
Ncoa6	nuclear receptor coactivator 6	Nuclear receptor coactivator 6 (Amplified in breast cancer protein 3) (Cancer-amplified transcriptional coactivator ASC-2) (Activating signal cointegrator 2) (ASC-2) (Peroxisome proliferator-activated receptor-interacting protein) (PPAR-interacting protei [Source:UniProtKB/Swiss-Prot;Acc:Q9JLI4] [ENSRNOT00000024714]	A_43_P18787	0.0443609	down	1.25643	Rn.9077
		BF287780 EST452371 Rat Gene Index, normalized rat, Rattus norvegicus cDNA Rattus norvegicus cDNA clone RGIGK04 5' sequence, mRNA sequence [BF287780]	A_44_P119763	0.0282438	up	1.43512
Olr150	olfactory receptor 150	Rattus norvegicus olfactory receptor 150 (Olr150), mRNA [NM_001000739]	A_44_P151533	0.00947961	down	1.15727	Rn.141850
			A_44_P653988	0.041365	down	1.09898
Fam175b	family with sequence similarity 175, member B"		A_44_P192058	0.0482118	up	1.13558	chr1:192341687-192343306
			A_44_P824294	0.0341525	up	1.08356
Hist3h2ba	histone cluster 3, H2ba"		A_44_P161846	0.0066732	down	1.45783	chr10:45238181-45238240
		AI136114 UI-R-C2p-ny-c-08-0-UI.s1 UI-R-C2p Rattus norvegicus cDNA clone UI-R-C2p-ny-c-08-0-UI 3', mRNA sequence [AI136114]	A_44_P849314	0.00513117	up	1.26145	Rn.154557
		BF282951 EST447542 Rat Gene Index, normalized rat, Rattus norvegicus cDNA Rattus norvegicus cDNA clone RGIDV44 3' sequence, mRNA sequence [BF282951]	A_44_P550025	0.0210913	up	1.28108	Rn.203263
		UI-R-BJ0p-afv-c-03-0-UI.s10 UI-R-BJ0p Rattus norvegicus cDNA clone UI-R-BJ0p-afv-c-03-0-UI 3', mRNA sequence [CK841668]	A_44_P320400	0.00623908	down	1.1427	Rn.11888
Camk1	calcium/calmodulin-dependent protein kinase I	Rattus norvegicus calcium/calmodulin-dependent protein kinase I (Camk1), mRNA [NM_134468]	A_44_P390979	0.0179806	up	1.40848	Rn.11018
			A_44_P807956	0.00870905	up	1.59551
		UI-R-BO1-apu-b-12-0-UI.s1 UI-R-BO1 Rattus norvegicus cDNA clone UI-R-BO1-apu-b-12-0-UI 3', mRNA sequence [BE097182]	A_44_P481708	0.0187406	up	1.28658	Rn.170609
		Rattus norvegicus similar to Heat shock cognate 71 kDa protein (LOC291461), mRNA [XM_212821]	A_44_P314122	0.0311835	up	1.12535
LOC499626	similar to hypothetical protein MGC39662	Rattus norvegicus similar to hypothetical protein MGC39662 (LOC499626), mRNA [NM_001024300]	A_44_P935156	0.0228121	down	1.10175	Rn.162587
		LOC501224 protein. [Source:UniProtKB/TrEMBL;Acc:Q0P5Q7] [ENSRNOT00000041734]	A_44_P944882	0.0432322	down	1.4436	Rn.136289
		Dystrophin (Fragment). [Source:UniProtKB/Swiss-Prot;Acc:P11530] [ENSRNOT00000035692]	A_44_P342632	0.0435025	down	1.15935
RGD1563281	similar to leucine-rich repeat domain-containing protein	PREDICTED: Rattus norvegicus similar to leucine-rich repeat domain-containing protein (predicted) (RGD1563281_predicted), mRNA [XM_001081403]	A_44_P131296	0.0362668	down	1.06712
Gripap1	GRIP1 associated protein 1	Rattus norvegicus GRIP1 associated protein 1 (Gripap1), mRNA [NM_053807]	A_42_P511410	0.0395231	up	1.08715	Rn.53868
Fmo4	flavin containing monooxygenase 4	Rattus norvegicus flavin containing monooxygenase 4 (Fmo4), transcript variant 1, mRNA [NM_144562]	A_44_P170368	0.0198144	up	1.31059	Rn.216582
Akap2	A kinase (PRKA) anchor protein 2	Rattus norvegicus A kinase (PRKA) anchor protein 2 (Akap2), mRNA [NM_001011974]	A_44_P509500	0.049536	down	1.26746	Rn.162811
Fndc3b	fibronectin type III domain containing 3B	Rattus norvegicus similar to FAD104 (LOC294925), mRNA [XM_226988]	A_44_P553047	0.0281159	down	1.03932	Rn.757
B4galt6	UDP-Gal:betaGlcNAc beta 1,4-galactosyltransferase, polypeptide 6"		A_44_P1032732	0.0201176	up	1.31189	chr18:12424503-12424444
Ddx11	DEAD/H (Asp-Glu-Ala-Asp/His) box polypeptide 11 (CHL1-like helicase homolog, S. cerevisiae)"		A_44_P637734	0.0384466	up	1.32923	chr9:105030359-105030418
Bub1b	budding uninhibited by benzimidazoles 1 homolog, beta (S. cerevisiae)"		A_44_P503490	0.0115034	down	2.00177	chr3:105077676-105077735
			A_44_P962458	0.0414135	down	1.18308
Tlk1	tousled-like kinase 1	Rattus norvegicus tousled-like kinase 1 (Tlk1), mRNA [NM_001107734]	A_44_P259329	0.0375606	down	1.29796	Rn.6114
LOC360807	LOC360807	Rattus norvegicus LOC360807 (LOC360807), mRNA [NM_001014128]	A_44_P1053365	0.028934	down	1.19377	Rn.79033
Arfgef1	ADP-ribosylation factor guanine nucleotide-exchange factor 1(brefeldin A-inhibited)	Rattus norvegicus similar to guanine nucleotide exchange factor (LOC312915), mRNA [XM_232614]	A_43_P20387	0.0319886	up	1.0934	Rn.6834
		UI-R-FF0-cpg-g-19-0-UI.s1 UI-R-FF0 Rattus norvegicus cDNA clone UI-R-FF0-cpg-g-19-0-UI 3', mRNA sequence [BQ781487]	A_44_P897620	0.0310437	up	1.08054	Rn.166681
		UI-R-BT1-aka-g-07-0-UI.r1 UI-R-BT1 Rattus norvegicus cDNA clone UI-R-BT1-aka-g-07-0-UI 5', mRNA sequence [BF566215]	A_44_P841672	0.0327211	up	1.42877	Rn.148258
		RVL2467 Wackym-Soares normalized rat vestibular cDNA library Rattus norvegicus cDNA 5', mRNA sequence [DV713600]	A_44_P880805	0.0148309	up	1.81687	Rn.164290
		AW920707 EST352011 Rat gene index, normalized rat, norvegicus, Bento Soares Rattus norvegicus cDNA clone RGIHB33 5' end, mRNA sequence [AW920707]	A_42_P697274	0.048168	up	1.12323	Rn.172116
			A_44_P807917	0.0304377	up	1.31055
		AI138044 UI-R-C2p-oi-g-02-0-UI.s1 UI-R-C2p Rattus norvegicus cDNA clone UI-R-C2p-oi-g-02-0-UI 3', mRNA sequence [AI138044]	A_44_P407059	0.039231	down	1.13444	Rn.198716
Acot2	acyl-CoA thioesterase 2	Rattus norvegicus acyl-CoA thioesterase 2 (Acot2), nuclear gene encoding mitochondrial protein, mRNA [NM_138907]	A_42_P597638	0.0111775	up	1.16414	Rn.37524
		AI178484 EST222158 Normalized rat placenta, Bento Soares Rattus sp. cDNA clone RPLCR63 3' end, mRNA sequence [AI178484]	A_44_P122841	0.0488172	down	1.22047	Rn.18496
		AA819418 UI-R-A0-bl-f-10-0-UI.s1 UI-R-A0 Rattus norvegicus cDNA clone UI-R-A0-bl-f-10-0-UI 3' similar to emb [AA819418]	A_44_P643852	0.0248042	down	1.09479	Rn.34155
Psmd7	proteasome (prosome, macropain) 26S subunit, non-ATPase, 7"		A_44_P536806	0.04805	up	1.58305	chr19:37456793-37456176
			A_44_P916648	0.0224625	down	2.12165
		RVL23571 Wackym-Soares normalized rat vestibular cDNA library Rattus norvegicus cDNA 5', mRNA sequence [DY472283]	A_44_P766691	0.0391538	up	1.47021	Rn.12409
		AGENCOURT_17582908 NIH_MGC_232 Rattus norvegicus cDNA clone IMAGE:7121197 5', mRNA sequence [CK478894]	A_44_P628127	0.024882	down	1.20007	Rn.19226
		Rattus norvegicus similar to glycoprotein hormone beta subunit (LOC366668), mRNA [XM_345688]	A_44_P539224	0.000426617	down	1.20159
		AMGNNUC:NRWA1-00003-G5-A W white adipose tiss (10479) Rattus norvegicus cDNA clone nrwa1-00003-g5 5', mRNA sequence [CB544807]	A_43_P17979	0.00721699	down	1.14543	Rn.200696
		Q46U86_RALEJ (Q46U86) Twin-arginine translocation pathway signal, partial (8%) [TC600657]	A_44_P402948	0.0189603	down	1.20213
		BF567614 UI-R-BO0-agr-f-11-0-UI.r1 UI-R-BO0 Rattus norvegicus cDNA clone UI-R-BO0-agr-f-11-0-UI 5', mRNA sequence [BF567614]	A_44_P225477	0.00948305	down	2.33948	Rn.58260
Saa4	serum amyloid A4, constitutive"		A_43_P10051	0.0158719	down	1.19131	chr1:97278512-97278453
Ell3	elongation factor RNA polymerase II-like 3	Rattus norvegicus elongation factor RNA polymerase II-like 3 (Ell3), mRNA [NM_001011957]	A_44_P443235	0.0427265	down	1.15088	Rn.162689
Cxcl13	chemokine (C-X-C motif) ligand 13	Rattus norvegicus chemokine (C-X-C motif) ligand 13 (Cxcl13), mRNA [NM_001017496]	A_44_P653053	0.0248008	up	5.43409	Rn.6917
			A_44_P342606	0.0449317	down	1.32
		RATEF1AA Rattus sp. transcription factor EF1(A) gene, complete cds [M95791]	A_44_P552751	0.0235946	up	1.51686
Fmo2	flavin containing monooxygenase 2	Rattus norvegicus flavin containing monooxygenase 2 (Fmo2), mRNA [NM_144737]	A_44_P486312	0.0413757	up	1.31697	Rn.3928
		AMGNNUC:NRHY7-00009-G6-A nrhy7 (10850) Rattus norvegicus cDNA clone nrhy7-00009-g6 5', mRNA sequence [CB545168]	A_43_P18278	0.0165498	up	1.17582	Rn.220772
Pgrmc2	progesterone receptor membrane component 2	Rattus norvegicus progesterone receptor membrane component 2 (Pgrmc2), mRNA [NM_001008374]	A_44_P492189	0.0236143	up	1.0887	Rn.7685
RT1-Aw2	RT1 class Ib, locus Aw2"		A_44_P324707	0.0237054	up	1.55775	chr20:3412477-3428860
		BF545957 UI-R-C2p-rd-b-05-0-UI.r1 UI-R-C2p Rattus norvegicus cDNA clone UI-R-C2p-rd-b-05-0-UI 5', mRNA sequence [BF545957]	A_44_P849592	0.0233581	down	1.25863	Rn.24778
Gnai1	guanine nucleotide binding protein (G protein), alpha inhibiting 1"		A_43_P11734	0.0355154	up	1.36407	chr4:12494429-12494970
			A_44_P607972	0.0474538	up	2.49248
Stac3	SH3 and cysteine rich domain 3	Rattus norvegicus SH3 and cysteine rich domain 3 (Stac3), mRNA [NM_001130558]	A_44_P1045734	0.0445834	down	1.36224	Rn.38669
			A_44_P893239	0.0268247	down	1.4021
		AMGNNUC:URRG1-00086-D3-A urrg1 (14046) Rattus norvegicus cDNA clone urrg1-00086-d3 5', mRNA sequence [CB717310]	A_43_P17540	0.0225122	down	1.39858	Rn.163677
		AI229438 EST226133 Normalized rat embryo, Bento Soares Rattus sp. cDNA clone REMCG36 3' end, mRNA sequence [AI229438]	A_44_P743412	0.0451146	up	1.76168	Rn.199261
Col24a1	collagen, type XXIV, alpha 1"		A_44_P639365	0.0396514	up	4.5029	chr2:243727511-243727570
		RVL7682 Wackym-Soares normalized rat vestibular cDNA library Rattus norvegicus cDNA 5', mRNA sequence [DV717216]	A_44_P274976	0.0086045	down	2.01496	Rn.17900
		AA996431 UI-R-C0-he-g-12-0-UI.s1 UI-R-C0 Rattus norvegicus cDNA clone UI-R-C0-he-g-12-0-UI 3', mRNA sequence [AA996431]	A_44_P481682	0.042875	down	1.48802	Rn.160441
		AI102064 EST211353 Normalized rat brain, Bento Soares Rattus sp. cDNA clone RBRBY48 3' end, mRNA sequence [AI102064]	A_44_P500321	0.0262034	down	1.34931	Rn.17101
		AA926202 UI-R-A1-eq-a-01-0-UI.s1 UI-R-A1 Rattus norvegicus cDNA clone UI-R-A1-eq-a-01-0-UI 3' similar to gi [AA926202]	A_44_P408928	0.0324127	down	1.16871	Rn.71883
Ebag9	estrogen receptor binding site associated, antigen, 9"		A_44_P1007708	0.0420422	up	1.18568	chr7:80532880-80532939
			A_44_P777788	0.0105105	up	1.03414
Tpd52	tumor protein D52	Rattus norvegicus tumor protein D52 (Tpd52), mRNA [NM_001106421]	A_44_P475744	0.0053437	up	1.11389	Rn.217984
		AA901218 UI-R-A1-dp-f-09-0-UI.s1 UI-R-A1 Rattus norvegicus cDNA clone UI-R-A1-dp-f-09-0-UI 3' similar to gi [AA901218]	A_44_P497882	0.0403217	up	1.11158	Rn.80843
Hs3st5	heparan sulfate (glucosamine) 3-O-sulfotransferase 5	Rattus norvegicus heparan sulfate (glucosamine) 3-O-sulfotransferase 5 (Hs3st5), mRNA [NM_001106392]	A_44_P433851	0.0182272	down	1.27628	Rn.117403
Galc	galactosylceramidase	Rattus norvegicus galactosylceramidase (Galc), mRNA [NM_001005888]	A_43_P18701	0.000884368	up	1.10219	Rn.211758
RGD1564579	similar to yippee-like 3	Rattus norvegicus similar to yippee-like 3 (RGD1564579), mRNA [NM_001135698]	A_42_P789204	0.0228474	down	1.37576	Rn.138455
Ywhag	tyrosine 3-monooxygenase/tryptophan 5-monooxygenase activation protein, gamma polypeptide"		A_44_P325791	0.0341252	up	1.33012	chr12:21887674-21887733
		AA955550 UI-R-E1-fa-h-03-0-UI.s1 UI-R-E1 Rattus norvegicus cDNA clone UI-R-E1-fa-h-03-0-UI 3' similar to gi [AA955550]	A_44_P404680	0.00927232	down	1.11072	Rn.6686
			A_44_P869661	0.0255493	down	1.06748
LOC680231	similar to chromodomain helicase DNA binding protein 9	PREDICTED: Rattus norvegicus similar to chromodomain helicase DNA binding protein 9 (LOC680231), mRNA [XR_005671]	A_44_P307013	0.0229597	down	1.10685	Rn.165698
		BF283806 EST448397 Rat Gene Index, normalized rat, Rattus norvegicus cDNA Rattus norvegicus cDNA clone RGIEH03, mRNA sequence [BF283806]	A_44_P263449	0.0324947	down	1.36788	Rn.13674
Pld2	phospholipase D2	Rattus norvegicus phospholipase D2 (Pld2), mRNA [NM_033299]	A_43_P12736	0.0238428	up	1.22881	Rn.9798
		BG381127 UI-R-CS0-btr-e-08-0-UI.s1 UI-R-CS0 Rattus norvegicus cDNA clone UI-R-CS0-btr-e-08-0-UI 3', mRNA sequence [BG381127]	A_44_P233478	0.0484473	down	1.15448	Rn.32045
		BE099798 UI-R-BJ1-atq-d-03-0-UI.s1 UI-R-BJ1 Rattus norvegicus cDNA clone UI-R-BJ1-atq-d-03-0-UI 3', mRNA sequence [BE099798]	A_44_P144018	0.00540534	up	1.15368	Rn.27063
Plcl1	phospholipase C-like 1	Rattus norvegicus phospholipase C-like 1 (Plcl1), mRNA [NM_053456]	A_42_P723851	0.00649219	up	1.61884	Rn.10684
		RVL19400 Wackym-Soares normalized rat vestibular cDNA library Rattus norvegicus cDNA 5', mRNA sequence [DV726988]	A_44_P804806	0.01193	up	1.33932	Rn.164681
Nmur1	neuromedin U receptor 1	Rattus norvegicus neuromedin U receptor 1 (Nmur1), mRNA [NM_023100]	A_43_P12364	0.0245911	down	1.11746	Rn.54457
Eif4e2	eukaryotic translation initiation factor 4E member 2	Rattus norvegicus eukaryotic translation initiation factor 4E member 2 (Eif4e2), mRNA [NM_001108808]	A_44_P152445	0.0248891	down	1.13323	Rn.11732
		BF553091 UI-R-C2-mv-c-12-0-UI.r1 UI-R-C2 Rattus norvegicus cDNA clone UI-R-C2-mv-c-12-0-UI 5', mRNA sequence [BF553091]	A_44_P368723	0.0291259	up	1.17475	Rn.202410
Lats2	large tumor suppressor 2	Rattus norvegicus large tumor suppressor 2 (Lats2), mRNA [NM_001107267]	A_43_P20430	0.0427012	down	1.08756	Rn.48618
		AA996919 UI-R-C0-hj-f-05-0-UI.s1 UI-R-C0 Rattus norvegicus cDNA clone UI-R-C0-hj-f-05-0-UI 3', mRNA sequence [AA996919]	A_44_P911452	0.0121758	down	1.31877	Rn.11422
LOC289614	similar to heat shock protein 1 (chaperonin)	PREDICTED: Rattus norvegicus similar to heat shock protein 1 (chaperonin) (LOC289614), mRNA [XR_005902]	A_44_P494396	0.0498383	up	1.50923	Rn.216166
RGD1305311	similar to hypothetical protein FLJ22527	Q4G164_HUMAN (Q4G164) IQCA protein, partial (21%) [TC637617]	A_44_P1027964	0.047859	down	1.43722	Rn.163088
		AI146103 UI-R-E1-fd-e-03-0-UI.s1 UI-R-E1 Rattus norvegicus cDNA clone UI-R-E1-fd-e-03-0-UI 3', mRNA sequence [AI146103]	A_44_P296901	0.0228234	down	1.57203	Rn.15638
Smg7	Smg-7 homolog, nonsense mediated mRNA decay factor (C. elegans)"		A_44_P711071	0.0481776	up	1.28527	chr13:67835716-67835657
Tmem195	transmembrane protein 195	Rattus norvegicus transmembrane protein 195 (Tmem195), mRNA [NM_001135899]	A_44_P504133	0.00362222	up	1.1917	Rn.152690
Arid4a	AT rich interactive domain 4A (Rbp1 like)	Rattus norvegicus similar to retinoblastoma-binding protein 1 isoform I; retinoblastoma-binding protein 1 (LOC314205), mRNA [XM_234281]	A_44_P331003	0.0431946	down	1.13974	Rn.219756
			A_44_P949064	0.0151745	up	1.26219
Hbq1	hemoglobin, theta 1"		A_44_P466845	0.00990155	down	1.16376	chr10:15582082-15581915
		AA997494 UI-R-C0-hw-e-06-0-UI.s1 UI-R-C0 Rattus norvegicus cDNA clone UI-R-C0-hw-e-06-0-UI 3', mRNA sequence [AA997494]	A_44_P188765	0.0202511	up	1.40192	Rn.8509
LOC361646	similar to K04F10.2	Rattus norvegicus similar to K04F10.2 (LOC361646), mRNA [NM_001134574]	A_43_P20354	0.0246334	down	1.12177	Rn.209023
Nphp4	nephronophthisis 4 (juvenile) homolog (human)	Rattus norvegicus nephronophthisis 4 (juvenile) homolog (human) (Nphp4), mRNA [NM_001037650]	A_44_P520757	0.0235817	up	1.20594	Rn.72800
Ccdc155	coiled-coil domain containing 155	PREDICTED: Rattus norvegicus similar to hypothetical protein FLJ32658 (predicted) (RGD1561972_predicted), mRNA [XM_238811]	A_44_P545887	0.0266572	down	1.01978	Rn.21840
		BI279615 UI-R-DE0-cae-f-02-0-UI.s1 UI-R-DE0 Rattus norvegicus cDNA clone UI-R-DE0-cae-f-02-0-UI 3', mRNA sequence [BI279615]	A_44_P757228	0.0100651	up	1.12467	Rn.3063
		Q86YA9_HUMAN (Q86YA9) Golgi associated, gamma adaptin ear containing, ARF binding protein 1, isoform 2, partial (6%) [TC586788]	A_44_P883921	0.0469931	down	1.30406
RatNP-3b	defensin RatNP-3 precursor	Rattus norvegicus defensin RatNP-3 precursor (RatNP-3b), mRNA [NM_001079898]	A_44_P203401	0.0144902	down	1.4583	Rn.114810
Leng1	leukocyte receptor cluster (LRC) member 1	Rattus norvegicus leukocyte receptor cluster (LRC) member 1 (Leng1), mRNA [NM_001106218]	A_44_P1010950	0.000321509	down	1.12977	Rn.49070
RGD1560280	similar to hypothetical protein D430020F16	Rattus norvegicus similar to hypothetical protein D430020F16 (LOC308724), mRNA [XM_218798]	A_44_P109864	0.0283871	down	1.63587	Rn.145007
		GB	A_44_P557444	0.011957	up	1.49614
		Rattus norvegicus similar to RIKEN cDNA 4930503E14 (LOC361022), mRNA [XM_341297]	A_44_P501429	0.0404094	down	1.22102
Boc	biregional cell adhesion molecule-related/down-regulated by oncogenes (Cdon) binding protein	Rattus norvegicus cDNA clone IMAGE:7105552, containing frame-shift errors [BC168188]	A_43_P20305	0.0242026	down	1.22252	Rn.51907
		AW915141 EST346445 Normalized rat embryo, Bento Soares Rattus sp. cDNA clone RGICK89 5' end, mRNA sequence [AW915141]	A_44_P897781	0.0201504	up	1.21664	Rn.7039
		UI-R-FS0-crt-d-06-0-UI.s1 UI-R-FS0 Rattus norvegicus cDNA clone UI-R-FS0-crt-d-06-0-UI 3', mRNA sequence [CB327764]	A_44_P505440	0.00988922	up	2.46298	Rn.147866
Sos2	son of sevenless homolog 2 (Drosophila)	Rattus norvegicus son of sevenless homolog 2 (Drosophila) (Sos2), mRNA [NM_001135561]	A_42_P559085	0.020584	down	1.60593	Rn.4226
		APTX_RAT (Q8K4H4) Aprataxin homolog (Forkhead-associated domain histidine triad-like protein) (FHA-HIT), complete [TC594299]	A_44_P1053316	0.0274797	up	1.16934
Zcchc8	zinc finger, CCHC domain containing 8"		A_44_P356242	0.0425612	up	1.33385	chr12:34029252-34029311
		BC050050 MAP3K12 protein {Homo sapiens} (exp=-1; wgp=0; cg=0), partial (12%) [TC591354]	A_44_P916002	0.0223413	up	1.18861
			A_44_P946089	0.0140801	up	1.26081
		AW917576 EST348880 Rat gene index, normalized rat, norvegicus, Bento Soares Rattus norvegicus cDNA clone RGIEF51 5' end, mRNA sequence [AW917576]	A_44_P604902	0.00813582	up	1.54189	Rn.166656
		AA799576 EST189073 Normalized rat heart, Bento Soares Rattus sp. cDNA clone RHEAC72 3' end, mRNA sequence [AA799576]	A_44_P313408	0.021062	up	1.23364	Rn.98470
		UI-R-BX0-arn-a-01-0-UI.s10.temp UI-R-BX0 Rattus norvegicus cDNA clone UI-R-BX0-arn-a-01-0-UI.temp 3', mRNA sequence [CK843548]	A_44_P228145	0.0202731	up	1.13505	Rn.1630
Chd8	chromodomain helicase DNA binding protein 8	Rattus norvegicus chromodomain helicase DNA binding protein 8 (Chd8), mRNA [NM_022933]	A_44_P604267	0.0419232	up	1.4639	Rn.98337
Ogdh	oxoglutarate (alpha-ketoglutarate) dehydrogenase (lipoamide)	2-oxoglutarate dehydrogenase E1 component, mitochondrial precursor (EC 1.2.4.2) (Alpha-ketoglutarate dehydrogenase). [Source:UniProtKB/Swiss-Prot;Acc:Q5XI78] [ENSRNOT00000008375]	A_44_P958051	0.00992148	up	1.11484	Rn.45991
LOC289673	similar to Glyceraldehyde-3-phosphate dehydrogenase (GAPDH)	PREDICTED: Rattus norvegicus similar to Glyceraldehyde-3-phosphate dehydrogenase (GAPDH) (LOC289673), mRNA [XR_006635]	A_44_P316374	0.0201911	down	1.23878	Rn.197151
		CA507578 UI-R-FS1-cqd-i-02-0-UI.s1 NCI_CGAP_FS1 Rattus norvegicus cDNA clone IMAGE:7361452 3', mRNA sequence [CA507578]	A_44_P305922	0.0327785	down	1.10291	Rn.14632
RGD1305793	similar to hypothetical protein FLJ20154	Rattus norvegicus similar to hypothetical protein FLJ20154 (RGD1305793), mRNA [NM_001127484]	A_44_P294087	0.0465677	up	1.49737	Rn.105679
		RVL18654 Wackym-Soares normalized rat vestibular cDNA library Rattus norvegicus cDNA 5', mRNA sequence [DV726345]	A_44_P580169	0.019133	up	1.8539	Rn.38679
		AW916189 EST347493 Rat gene index, normalized rat, norvegicus, Bento Soares Rattus norvegicus cDNA clone RGIDJ20 5' end, mRNA sequence [AW916189]	A_44_P486246	0.00552674	down	1.14373	Rn.203775
Add3	adducin 3 (gamma)	Rattus norvegicus adducin 3 (gamma) (Add3), mRNA [NM_031552]	A_44_P400147	0.0372756	down	1.18974	Rn.76589
		BE107113 UI-R-BS1-ayq-a-05-0-UI.s1 UI-R-BS1 Rattus norvegicus cDNA clone UI-R-BS1-ayq-a-05-0-UI 3', mRNA sequence [BE107113]	A_44_P364884	0.0475297	down	1.18164	Rn.159939
			A_44_P555921	0.00327169	down	2.31487
		AI176323 EST219906 Normalized rat ovary, Bento Soares Rattus sp. cDNA clone ROVBQ11 3' end, mRNA sequence [AI176323]	A_44_P436628	0.0168367	up	1.60263	Rn.164465
		AI105020 EST214309 Normalized rat heart, Bento Soares Rattus sp. cDNA clone RHECM58 3' end, mRNA sequence [AI105020]	A_44_P505608	0.0302414	up	1.08825	Rn.101963
		Rattus norvegicus similar to hypothetical protein (LOC288117), mRNA [XM_221463]	A_44_P352198	0.0448979	down	1.16226
		FM127827 etnokid Rattus norvegicus cDNA clone etnokidP0014O17 5', mRNA sequence [FM127827]	A_44_P579054	0.0336494	up	1.48272	Rn.203416
		AA875256 UI-R-E0-cq-d-11-0-UI.s1 UI-R-E0 Rattus norvegicus cDNA clone UI-R-E0-cq-d-11-0-UI 3' similar to gi [AA875256]	A_44_P248746	0.00304025	up	1.05289
		BG377835 UI-R-CU0-bvf-g-03-0-UI.s1 UI-R-CU0 Rattus norvegicus cDNA clone UI-R-CU0-bvf-g-03-0-UI 3', mRNA sequence [BG377835]	A_44_P710764	0.0265108	up	1.0245	Rn.41457
LOC691518	hypothetical protein LOC691518	PREDICTED: Rattus norvegicus hypothetical protein LOC691518 (LOC691518), mRNA [XR_007136]	A_44_P185115	0.0297009	down	1.40852	Rn.201728
Nub1	negative regulator of ubiquitin-like proteins 1	Rattus norvegicus negative regulator of ubiquitin-like proteins 1 (Nub1), mRNA [NM_001013925]	A_44_P462823	0.0163346	up	1.44709	Rn.72440
Mfrp	membrane frizzled-related protein	Rattus norvegicus membrane frizzled-related protein (Mfrp), mRNA [NM_001108137]	A_44_P262989	0.042234	down	1.44622	Rn.20302
Fat1	FAT tumor suppressor homolog 1 (Drosophila)	Rattus norvegicus FAT tumor suppressor homolog 1 (Drosophila) (Fat1), mRNA [NM_031819]	A_42_P592144	0.0189474	up	1.38848	Rn.8633
RGD1565168	similar to RAP2A, member of RAS oncogene family"		A_44_P178354	0.0224962	down	1.54468	chr6:136246255-136246196
		Rattus norvegicus similar to 3-phosphoglycerate dehydrogenase (LOC290415), mRNA [XM_224421]	A_44_P480472	0.0409422	down	1.28191
Myl9	Myosin light chain 9	BI285476 UI-R-DD0-caa-f-02-0-UI.s1 UI-R-DD0 Rattus norvegicus cDNA clone UI-R-DD0-caa-f-02-0-UI 3', mRNA sequence [BI285476]	A_44_P181718	0.00102036	down	1.11666	Rn.6870
Jarid1b	jumonji, AT rich interactive domain 1B"		A_44_P342245	0.00915048	down	1.14948	chr13:47575767-47575826
		PREDICTED: Rattus norvegicus similar to CD79A antigen (immunoglobulin-associated alpha) (LOC687079), mRNA [XM_001077003]	A_44_P790500	0.0319242	down	1.1913	Rn.178258
		UI-R-BO0-ahu-b-01-0-UI.r1 UI-R-BO0 Rattus norvegicus cDNA clone UI-R-BO0-ahu-b-01-0-UI 5', mRNA sequence [BF567259]	A_44_P851372	0.0424325	up	1.84605	Rn.169408
		UI-R-C0-jp-b-05-0-UI.s1 UI-R-C0 Rattus norvegicus cDNA clone UI-R-C0-jp-b-05-0-UI 3', mRNA sequence [AI030852]	A_42_P538232	0.00152857	up	1.16309	Rn.165959
RGD1306783	similar to 2810422O20Rik protein	Rattus norvegicus similar to 2810422O20Rik protein (RGD1306783), mRNA [NM_001025668]	A_43_P23277	0.0183514	up	1.13551	Rn.206031
		EST196748 Normalized rat kidney, Bento Soares Rattus sp. cDNA clone RKIBA22 3' end, mRNA sequence [AA892945]	A_44_P771444	0.0436726	down	1.07069	Rn.133864
LOC300491	similar to enolase 1, alpha	PREDICTED: Rattus norvegicus similar to enolase 1, alpha (LOC300491), mRNA [XR_005672]	A_44_P394150	0.00809552	up	1.38533	Rn.197390
Thumpd2	THUMP domain containing 2	Rattus norvegicus THUMP domain containing 2 (Thumpd2), mRNA [NM_001012108]	A_44_P102001	0.0404504	up	1.287	Rn.204569
		BF410284 UI-R-CA1-bjv-f-12-0-UI.s1 UI-R-CA1 Rattus norvegicus cDNA clone UI-R-CA1-bjv-f-12-0-UI 3', mRNA sequence [BF410284]	A_44_P136592	0.0454203	down	1.3405	Rn.39142
			A_44_P516110	0.0395645	down	1.04857
Murc	muscle-restricted coiled-coil protein	Rattus norvegicus muscle-restricted coiled-coil protein (Murc), mRNA [NM_001107931]	A_44_P541485	0.0231519	down	1.11579	Rn.218700
		AGENCOURT_66948208 NIH_MGC_366 Rattus norvegicus cDNA clone IMAGE:8369858 5', mRNA sequence [DY319844]	A_44_P369500	0.0189443	down	1.58892	Rn.148773
		AGENCOURT_27529510 NIH_MGC_254 Rattus norvegicus cDNA clone IMAGE:7313794 5', mRNA sequence [CO397192]	A_44_P111613	0.0134677	down	1.36716	Rn.163637
Brf1	BRF1 homolog, subunit of RNA polymerase III transcription initiation factor IIIB (S. cerevisiae)"		A_42_P742797	0.0407531	down	1.04763	chr6:137963059-137963000
Slc25a2	solute carrier family 25 (mitochondrial carrier, ornithine transporter) member 2"		A_44_P272094	0.0344714	down	1.12176	chr18:30537225-30537166
Atp6ap2	ATPase, H+ transporting, lysosomal accessory protein 2"		A_44_P504019	0.0072778	up	1.3524	chrX:22265025-22224634
Polr3e	polymerase (RNA) III (DNA directed) polypeptide E (80kD)	Rattus norvegicus polymerase (RNA) III (DNA directed) polypeptide E (80kD) (Polr3e), mRNA [NM_001108503]	A_44_P102774	0.0140732	up	1.26251	Rn.11830
		AA957455 UI-R-E1-fw-a-07-0-UI.s1 UI-R-E1 Rattus norvegicus cDNA clone UI-R-E1-fw-a-07-0-UI 3', mRNA sequence [AA957455]	A_44_P110469	0.0133668	up	1.19442
RGD1304704	similar to Hypothetical protein CGI-99	Rattus norvegicus similar to Hypothetical protein CGI-99 (RGD1304704), mRNA [NM_001047874]	A_42_P751368	0.0370776	down	1.19227	Rn.1434
			A_44_P638225	0.0358843	up	1.30013
		AW142969 EST293261 Normalized rat ovary, Bento Soares Rattus sp. cDNA clone RGIBA68 5' end, mRNA sequence [AW142969]	A_44_P251787	0.00632091	down	1.12827	Rn.29057
Mapkapk5	mitogen-activated protein kinase-activated protein kinase 5	Rattus norvegicus mitogen-activated protein kinase-activated protein kinase 5 (Mapkapk5), mRNA [NM_001025761]	A_44_P508019	0.0243482	up	1.34936	Rn.17463
RGD1565584	similar to tyrosine kinase-associated leucine zipper protein LAZipII	Rattus norvegicus similar to tyrosine kinase-associated leucine zipper protein LAZipII (RGD1565584), mRNA [NM_001106279]	A_44_P329784	0.0399016	up	1.75708	Rn.35776
		AI555272 UI-R-C2p-qv-h-10-0-UI.s1 UI-R-C2p Rattus norvegicus cDNA clone UI-R-C2p-qv-h-10-0-UI 3', mRNA sequence [AI555272]	A_44_P197816	0.0257363	up	1.70627	Rn.788
Khdrbs2	KH domain containing, RNA binding, signal transduction associated 2"		A_42_P832133	0.0392011	down	1.50881	chr9:31403711-31403770
		AW520967 UI-R-BO0-agq-e-03-0-UI.s1 UI-R-BO0 Rattus norvegicus cDNA clone UI-R-BO0-agq-e-03-0-UI 3', mRNA sequence [AW520967]	A_44_P365057	0.00334098	down	1.14051	Rn.10368
		Q3UPF3_MOUSE (Q3UPF3) 6 days neonate spleen cDNA, RIKEN full-length enriched library, clone:F420005A04 product:TAFII250 homolog (Fragment), partial (6%) [TC620069]	A_44_P779002	0.0367216	up	1.35843
		BM392202 UI-R-DO1-ckp-o-12-0-UI.s1 UI-R-DO1 Rattus norvegicus cDNA clone UI-R-DO1-ckp-o-12-0-UI 3', mRNA sequence [BM392202]	A_44_P696755	0.0489751	down	1.28619	Rn.21422
LOC315661	similar to eukaryotic translation elongation factor 1 alpha 2	PREDICTED: Rattus norvegicus similar to eukaryotic translation elongation factor 1 alpha 2 (LOC315661), mRNA [XR_006926]	A_44_P138231	0.0408925	up	1.23283	Rn.197384
Lrrc1	leucine rich repeat containing 1	Rattus norvegicus leucine rich repeat containing 1 (Lrrc1), mRNA [NM_001014268]	A_44_P448234	0.0031693	up	1.22452	Rn.15622
Nap1l3	nucleosome assembly protein 1-like 3	Rattus norvegicus nucleosome assembly protein 1-like 3 (Nap1l3), mRNA [NM_133402]	A_42_P764985	0.000382235	up	1.33034	Rn.27765
		AI043642 UI-R-C0-jl-d-09-0-UI.s1 UI-R-C0 Rattus norvegicus cDNA clone UI-R-C0-jl-d-09-0-UI 3', mRNA sequence [AI043642]	A_44_P221402	0.00530763	down	1.08961	Rn.103382
LOC499900	similar to Zinc finger protein 133	Rattus norvegicus similar to Zinc finger protein 133 (LOC499900), mRNA [NM_001024313]	A_44_P683157	0.0452817	up	1.49786	Rn.117293
Prph	peripherin	Rattus norvegicus peripherin (Prph), mRNA [NM_012633]	A_43_P11494	0.00802298	down	1.63511	Rn.11086
		Q7TQ10_RAT (Q7TQ10) Aa1027, partial (16%) [TC633534]	A_44_P732935	0.0438362	down	1.21564
Heyl	hairy/enhancer-of-split related with YRPW motif-like	Rattus norvegicus hairy/enhancer-of-split related with YRPW motif-like (Heyl), mRNA [NM_001107977]	A_44_P508945	0.0297767	down	1.14883	Rn.22252
Map2k7	mitogen activated protein kinase kinase 7	Rattus norvegicus mitogen activated protein kinase kinase 7 (Map2k7), mRNA [NM_001025425]	A_43_P18491	0.0211943	down	1.06639	Rn.162081
			A_44_P730554	0.0279785	up	2.41824
Ptchd1	patched domain containing 1	PREDICTED: Rattus norvegicus patched domain containing 1 (predicted) (Ptchd1_predicted), mRNA [XM_228985]	A_43_P22791	0.0133198	down	1.28485
Htatip2	HIV-1 tat interactive protein 2, homolog (human)"		A_44_P1057585	0.015913	up	1.5659	chrUn:45106747-45106688
RGD1565149	similar to chromosome 16 open reading frame 7	Rattus norvegicus similar to chromosome 16 open reading frame 7 (RGD1565149), mRNA [NM_001107440]	A_44_P333168	0.0312255	up	1.33714	Rn.204969
		UI-R-CN1-cmq-f-03-0-UI.s1 UI-R-CN1 Rattus norvegicus cDNA clone UI-R-CN1-cmq-f-03-0-UI 3', mRNA sequence [BQ195654]	A_44_P860405	0.0225507	down	1.646	Rn.105909
		AI102271 EST211560 Normalized rat brain, Bento Soares Rattus sp. cDNA clone RBRCB42 3' end, mRNA sequence [AI102271]	A_44_P819221	0.0168467	up	1.37717
Dynlt1	dynein light chain Tctex-type 1	Rattus norvegicus dynein light chain Tctex-type 1 (Dynlt1), mRNA [NM_031318]	A_42_P762814	0.0139829	down	1.34315	Rn.29901
Cd6	Cd6 molecule	Rattus norvegicus Cd6 molecule (Cd6), mRNA [NM_175577]	A_44_P116555	0.00485554	down	1.30143	Rn.57361
		Q6PIP5_MOUSE (Q6PIP5) Chronic myelogenous leukemia tumor antigen 66, partial (11%) [TC596721]	A_42_P843592	0.0185211	up	1.05995
Rbm43	RNA binding motif protein 43	Rattus norvegicus RNA binding motif protein 43 (Rbm43), mRNA [NM_001037649]	A_44_P168602	0.0132034	down	1.30429	Rn.117592
		AI011444 EST205895 Normalized rat ovary, Bento Soares Rattus sp. cDNA clone ROVAV05 3' end, mRNA sequence [AI011444]	A_44_P365076	0.00928283	up	1.13034	Rn.107412
		PREDICTED: Rattus norvegicus zinc finger, CCHC domain containing 14 (predicted) (Zcchc14_predicted), mRNA [XM_344780]	A_43_P19315	0.0372453	down	1.08135	Rn.94784
Myo1e	myosin IE	Rattus norvegicus myosin IE (Myo1e), mRNA [NM_173101]	A_44_P451568	0.00948719	down	1.67828	Rn.8737
Msx1	msh homeobox 1	Rattus norvegicus msh homeobox 1 (Msx1), mRNA [NM_031059]	A_42_P571433	0.010446	down	1.24505	Rn.18117
		BQ779899 UI-R-FF0-cox-m-16-0-UI.s1 NCI_CGAP_FF0 Rattus norvegicus cDNA clone UI-R-FF0-cox-m-16-0-UI 3', mRNA sequence [BQ779899]	A_44_P169677	0.029875	down	1.16441	Rn.14866
Gpr37	G protein-coupled receptor 37	Rattus norvegicus G protein-coupled receptor 37 (Gpr37), mRNA [NM_057201]	A_44_P196217	0.00859975	up	2.04147	Rn.28035
Lox	lysyl oxidase	Rattus norvegicus lysyl oxidase mRNA, complete cds and multiple polyadenylation sites [U11038]	A_42_P585695	0.0126993	down	1.6307	Rn.11372
Tmx2	thioredoxin-related transmembrane protein 2	Rattus norvegicus thioredoxin-related transmembrane protein 2 (Tmx2), mRNA [NM_001007643]	A_44_P142562	0.0360541	down	1.19584	Rn.3027
Gart	phosphoribosylglycinamide formyltransferase	Rattus norvegicus phosphoribosylglycinamide formyltransferase (Gart), mRNA [NM_001011899]	A_42_P581567	0.0470139	up	1.30954	Rn.55532
		Rattus norvegicus similar to Src-like-adaptor 2 isoform a; Src-like adapter protein-2 (LOC366236), mRNA [XM_345459]	A_44_P227299	0.00873379	down	2.22775
Ttll12	tubulin tyrosine ligase-like family, member 12"		A_44_P324087	0.013227	down	1.18141	chr7:121601718-121601659
		AI639254 rx01079s Rat mixed-tissue library Rattus norvegicus cDNA clone rx01079 3', mRNA sequence [AI639254]	A_44_P430517	0.0106768	down	1.12826	Rn.87544
Tpr	translocated promoter region	Rattus norvegicus translocated promoter region (Tpr), mRNA [NM_001107185]	A_44_P1051281	0.031602	down	1.11125	Rn.58980
		AI230625 EST227320 Normalized rat embryo, Bento Soares Rattus sp. cDNA clone REMCZ18 3' end, mRNA sequence [AI230625]	A_44_P488713	0.0166745	down	1.22662	Rn.216648
Olr1230	olfactory receptor 1230	Rattus norvegicus olfactory receptor 1230 (Olr1230), mRNA [NM_001000595]	A_44_P189393	0.0462998	down	1.17823	Rn.143539
		BE100006 UI-R-BJ1-atr-f-05-0-UI.s1 UI-R-BJ1 Rattus norvegicus cDNA clone UI-R-BJ1-atr-f-05-0-UI 3', mRNA sequence [BE100006]	A_44_P141872	0.00541183	down	1.20324	Rn.220620
Ralbp1	ralA binding protein 1	Rattus norvegicus ralA binding protein 1 (Ralbp1), mRNA [NM_032067]	A_44_P442941	0.00499828	up	1.16486	Rn.7107
		AA943829 EST199328 Normalized rat brain, Bento Soares Rattus sp. cDNA clone RBRAQ23 3' end, mRNA sequence [AA943829]	A_44_P352807	0.0485847	down	1.24297	Rn.11652
		AA924386 UI-R-A1-ds-b-04-0-UI.s1 UI-R-A1 Rattus norvegicus cDNA clone UI-R-A1-ds-b-04-0-UI 3', mRNA sequence [AA924386]	A_44_P150137	0.0360184	down	1.1988	Rn.41055
Cacna1c	calcium channel, voltage-dependent, L type, alpha 1C subunit"		A_44_P203145	0.0218691	up	1.41642	chr4:154896033-154895974
Sorcs1	sortilin-related VPS10 domain containing receptor 1	PREDICTED: Rattus norvegicus VPS10 domain receptor protein SORCS 1 (predicted) (Sorcs1_predicted), mRNA [XM_220080]	A_44_P344642	0.0254588	down	1.21128	Rn.214158
			A_44_P250565	0.0129703	down	1.21144
		UI-R-CN1-cji-a-16-0-UI.s1 UI-R-CN1 Rattus norvegicus cDNA clone UI-R-CN1-cji-a-16-0-UI 3', mRNA sequence [BM387035]	A_44_P631280	0.016632	down	1.27284	Rn.146373
Mpp2	membrane protein, palmitoylated 2 (MAGUK p55 subfamily member 2)"		A_43_P15956	0.0336314	down	1.63075	chr10:91153716-91149158
		BF404765 UI-R-CA1-bid-d-04-0-UI.s1 UI-R-CA1 Rattus norvegicus cDNA clone UI-R-CA1-bid-d-04-0-UI 3', mRNA sequence [BF404765]	A_44_P192685	0.0463185	down	1.76816	Rn.148804
		Rattus norvegicus similar to MSTP042 (LOC297797), mRNA [XM_216326]	A_44_P1043555	0.0481275	up	1.30513
		AA892942 EST196745 Normalized rat kidney, Bento Soares Rattus sp. cDNA clone RKIBA19 3' end, mRNA sequence [AA892942]	A_44_P444456	0.0177537	down	1.12405	Rn.75470
Slc29a4	solute carrier family 29 (nucleoside transporters), member 4"		A_43_P19548	0.0194872	down	1.15501	chr12:12242323-12242264
RGD1359600	LEA_4 domain containing protein RGD1359600	Rattus norvegicus LEA_4 domain containing protein RGD1359600 (RGD1359600), mRNA [NM_001007688]	A_44_P853901	0.0377597	up	1.16024	Rn.8288
		BF289888 EST454479 Rat Gene Index, normalized rat, Rattus norvegicus cDNA Rattus norvegicus cDNA clone RGIHL59, mRNA sequence [BF289888]	A_44_P583973	0.0202511	up	1.50828
		UI-R-E0-di-b-08-0-UI.s1 UI-R-E0 Rattus norvegicus cDNA clone UI-R-E0-di-b-08-0-UI 3', mRNA sequence [AA900739]	A_44_P183290	0.00460557	down	1.07854	Rn.25133
Slc7a13	solute carrier family 7, (cationic amino acid transporter, y+ system) member 13"		A_44_P250823	0.00752025	up	1.10613	chr5:34434577-34434636
		Histone H4 [Contains: Osteogenic growth peptide (OGP)]. [Source:UniProtKB/Swiss-Prot;Acc:P62804] [ENSRNOT00000051095]	A_44_P494250	0.040426	down	1.85578
Usp25	ubiquitin specific peptidase 25	Rattus norvegicus ubiquitin specific peptidase 25 (Usp25), mRNA [NM_001107114]	A_44_P248705	0.0292395	up	1.37258	Rn.23509
Fmo13	flavin-containing monooxygenase 13	PREDICTED: Rattus norvegicus flavin-containing monooxygenase 13 (predicted) (Fmo13_predicted), mRNA [XM_222849]	A_44_P499029	0.00752426	up	1.24969
S100a7a	S100 calcium binding protein A7A	UI-R-DZ0-crp-f-03-0-UI.s1 UI-R-DZ0 Rattus norvegicus cDNA clone UI-R-DZ0-crp-f-03-0-UI 3', mRNA sequence [CB326327]	A_44_P478638	0.0448313	down	1.05358	Rn.15117
		AGENCOURT_26747151 NIH_MGC_255 Rattus norvegicus cDNA clone IMAGE:7318617 5', mRNA sequence [CO403766]	A_44_P975286	0.00825718	up	1.10136	Rn.164897
Psap	prosaposin	Rattus norvegicus prosaposin (Psap), mRNA [NM_013013]	A_44_P290231	0.0303478	up	1.25694	Rn.97173
Cdc2l5	cell division cycle 2-like 5 (cholinesterase-related cell division controller)	Rattus norvegicus similar to cell division cycle 2-like 5 isoform 1; CDC2-related protein kinase 5 (LOC306998), mRNA [XM_225404]	A_43_P16717	0.0411939	up	1.12939	Rn.23420
		BI285141 UI-R-DB0-byw-f-05-0-UI.s1 UI-R-DB0 Rattus norvegicus cDNA clone UI-R-DB0-byw-f-05-0-UI 3', mRNA sequence [BI285141]	A_44_P327204	0.0251899	down	1.06182	Rn.6007
Fnbp4	formin binding protein 4	Rattus norvegicus formin binding protein 4 (Fnbp4), mRNA [NM_001013159]	A_44_P302313	0.0477354	up	1.24613	Rn.66946
			A_44_P594033	0.0361361	down	1.67713
Pmm2	phosphomannomutase 2	Rattus norvegicus phosphomannomutase 2 (Pmm2), mRNA [NM_001106973]	A_43_P17400	0.00868669	up	1.1284	Rn.58278
Glud1	glutamate dehydrogenase 1	Rattus norvegicus glutamate dehydrogenase 1 (Glud1), mRNA [NM_012570]	A_44_P259908	0.00723814	up	1.13907	Rn.55106
		UI-R-CA1-bbi-c-01-0-UI.s1 UI-R-CA1 Rattus norvegicus cDNA clone UI-R-CA1-bbi-c-01-0-UI 3', mRNA sequence [BF386326]	A_44_P774512	0.00769991	down	1.43067	Rn.209123
Gli1	GLI-Kruppel family member GLI1	Zinc finger transcription factor GLI (Fragment). [Source:UniProtKB/TrEMBL;Acc:Q91WY6] [ENSRNOT00000009803]	A_43_P16047	0.0127413	down	1.51706	Rn.219157
		Q7TQ12_RAT (Q7TQ12) Aa1114, partial (11%) [TC580645]	A_44_P700742	0.0372141	up	1.46966
Olr1679	olfactory receptor 1679	Rattus norvegicus olfactory receptor 1679 (Olr1679), mRNA [NM_001000892]	A_44_P306414	0.0121558	down	1.0524	Rn.142696
Col23a1	collagen, type XXIII, alpha 1"		A_44_P393521	0.046042	down	1.18036	chr10:37087721-37088078
		Rattus norvegicus similar to phosphoprotein enriched in astrocytes 15 (LOC364052), mRNA [XM_344175]	A_44_P187293	0.0288505	up	1.07428
Stmn2	stathmin-like 2	Rattus norvegicus stathmin-like 2 (Stmn2), mRNA [NM_053440]	A_44_P496061	0.000178402	up	2.13214	Rn.34335
Igf1	insulin-like growth factor 1	Rattus norvegicus insulin-like growth factor 1 (Igf1), transcript variant 4, mRNA [NM_001082479]	A_44_P126021	0.0159338	up	1.32525	Rn.6282
Erf	Ets2 repressor factor	PREDICTED: Rattus norvegicus Ets2 repressor factor (predicted) (Erf_predicted), mRNA [XM_218336]	A_44_P116703	0.0319198	down	1.23651	Rn.9093
		UI-R-BS2-beq-b-05-0-UI.s1 UI-R-BS2 Rattus norvegicus cDNA clone UI-R-BS2-beq-b-05-0-UI 3', mRNA sequence [BF398551]	A_44_P782781	0.0316084	down	1.12619	Rn.148857
Tnpo3	transportin 3	Rattus norvegicus transportin 3 (Tnpo3), mRNA [NM_001106587]	A_44_P173365	0.0317653	up	2.06354	Rn.164462
		Angiotensin-converting enzyme, somatic isoform precursor (EC 3.4.15.1) (Dipeptidyl carboxypeptidase I) (Kininase II) [Contains: Angiotensin- converting enzyme, somatic isoform, soluble form]. [Source:UniProtKB/Swiss-Prot;Acc:P47820] [ENSRNOT00000031440]	A_44_P513075	0.0121613	down	1.24024	Rn.10149
Otor	otoraplin	Rattus norvegicus otoraplin (Otor), mRNA [NM_001108960]	A_44_P452617	0.0247094	up	1.25054	Rn.218530
Plcxd2	phosphatidylinositol-specific phospholipase C, X domain containing 2"		A_44_P829145	0.0137136	down	1.63625	chr11:56335746-56335805
Etnk1	ethanolamine kinase 1	Rattus norvegicus ethanolamine kinase 1 (Etnk1), mRNA [NM_001107894]	A_43_P10213	0.0489684	up	1.51218	Rn.7630
Tmed10	transmembrane emp24-like trafficking protein 10 (yeast)	Rattus norvegicus transmembrane emp24-like trafficking protein 10 (yeast) (Tmed10), mRNA [NM_053467]	A_44_P175391	0.0376346	up	1.18884	Rn.8509
			A_44_P612079	0.0400486	up	1.30621
		RVL7487 Wackym-Soares normalized rat vestibular cDNA library Rattus norvegicus cDNA 5', mRNA sequence [DV717032]	A_44_P845543	0.00733597	up	1.32036	Rn.149098
Tlk2	tousled-like kinase 2	Tlk2_predicted protein (Fragment). [Source:UniProtKB/TrEMBL;Acc:Q5RJQ5] [ENSRNOT00000008482]	A_44_P806040	0.0240847	up	1.07057	Rn.23125
Olr398	olfactory receptor 398	Rattus norvegicus olfactory receptor 398 (Olr398), mRNA [NM_001000830]	A_44_P346513	0.0450038	down	1.15731	Rn.143040
Thbs2	thrombospondin 2	Rattus norvegicus thrombospondin 2 (TSP-2), mRNA [XM_214778]	A_44_P248090	0.0226728	up	1.34836	Rn.165619
		UI-R-FS0-cqp-l-11-0-UI.s1 UI-R-FS0 Rattus norvegicus cDNA clone UI-R-FS0-cqp-l-11-0-UI 3', mRNA sequence [CA509128]	A_44_P206632	0.011817	down	1.09934	Rn.18666
		Rattus norvegicus similar to CG14182-PA (LOC361639), mRNA [XM_341918]	A_44_P128386	0.00282525	up	1.14313
			A_43_P13875	0.0469965	down	2.10953
Usp42	ubiquitin specific peptidase 42	Rattus norvegicus ubiquitin specific peptidase 42 (Usp42), mRNA [NM_001105909]	A_44_P160294	0.0219944	up	1.16631	Rn.25011
		UI-R-BO1-aps-b-06-0-UI.s1 UI-R-BO1 Rattus norvegicus cDNA clone UI-R-BO1-aps-b-06-0-UI 3', mRNA sequence [BE101695]	A_44_P931207	0.0386241	up	1.17857	Rn.54190
		EST293380 Normalized rat brain, Bento Soares Rattus sp. cDNA clone RGIBD15 5' end, mRNA sequence [AW143084]	A_44_P159595	0.0234448	down	1.11496	Rn.8243
Gpatch4	G patch domain containing 4	Rattus norvegicus G patch domain containing 4 (Gpatch4), mRNA [NM_001024979]	A_44_P149662	0.0115339	up	1.40208	Rn.20166
		BG377463 UI-R-CU0-bvd-a-05-0-UI.s1 UI-R-CU0 Rattus norvegicus cDNA clone UI-R-CU0-bvd-a-05-0-UI 3', mRNA sequence [BG377463]	A_44_P233011	0.0329022	up	1.60439	Rn.43451
			A_44_P732028	0.0220736	down	1.67029
Sppl2a	signal peptide peptidase-like 2A	Rattus norvegicus signal peptide peptidase-like 2A (Sppl2a), mRNA [NM_001107770]	A_44_P159221	0.00786996	up	1.22071	Rn.8666
		AA943794 EST199293 Normalized rat brain, Bento Soares Rattus sp. cDNA clone RBRAP76 3' end, mRNA sequence [AA943794]	A_44_P479216	0.0497387	up	1.51374	Rn.163751
Arap2	ArfGAP with RhoGAP domain, ankyrin repeat and PH domain 2"		A_44_P112119	0.0280162	down	1.13122	chr14:50785270-50785329
Olr662	olfactory receptor 662	Rattus norvegicus olfactory receptor 662 (Olr662), mRNA [NM_001001060]	A_44_P107190	0.0435381	down	1.43741	Rn.142839
		UI-R-BT1-bmu-h-08-0-UI.s1 UI-R-BT1 Rattus norvegicus cDNA clone UI-R-BT1-bmu-h-08-0-UI 3', mRNA sequence [BF412188]	A_44_P801516	0.0488085	down	1.0927	Rn.211395
LOC299524	similar to heat shock protein 1, beta	PREDICTED: Rattus norvegicus similar to heat shock protein 1, beta (LOC299524), mRNA [XR_008192]	A_44_P508992	0.0418265	up	1.14353	Rn.197519
Prdx2	peroxiredoxin 2	Rattus norvegicus peroxiredoxin 2 (Prdx2), nuclear gene encoding mitochondrial protein, mRNA [NM_017169]	A_43_P14135	0.000890229	down	1.3133	Rn.2511
Htr6	5-hydroxytryptamine (serotonin) receptor 6	Rattus norvegicus 5-hydroxytryptamine (serotonin) receptor 6 (Htr6), mRNA [NM_024365]	A_44_P114052	0.00959376	down	1.23614	Rn.10552
		AI408734 EST237025 Normalized rat ovary, Bento Soares Rattus sp. cDNA clone ROVEG34 3' end, mRNA sequence [AI408734]	A_44_P239653	0.0354135	down	1.09126	Rn.18295
		UI-R-BO1-aiy-b-03-0-UI.r1 UI-R-BO1 Rattus norvegicus cDNA clone UI-R-BO1-aiy-b-03-0-UI 5', mRNA sequence [BF563060]	A_44_P752342	0.0119989	up	1.24642	Rn.154049
		AI412190 EST240484 Normalized rat kidney, Bento Soares Rattus sp. cDNA clone RKIEN17 3' end, mRNA sequence [AI412190]	A_44_P519096	0.0419782	down	1.29813	Rn.164440
		AW531533 UI-R-BT1-aku-a-12-0-UI.s1 UI-R-BT1 Rattus norvegicus cDNA clone UI-R-BT1-aku-a-12-0-UI 3', mRNA sequence [AW531533]	A_44_P941184	0.038129	down	1.40278	Rn.10610
Uchl5ip	UCHL5 interacting protein	Rattus norvegicus UCHL5 interacting protein (Uchl5ip), mRNA [NM_001110488]	A_43_P11288	0.0272004	up	1.32803	Rn.17090
LOC680222	similar to zinc finger protein 748 isoform 2	PREDICTED: Rattus norvegicus similar to zinc finger protein 748 isoform 2 (LOC680222), mRNA [XM_001056172]	A_44_P869099	0.0185285	down	1.30934	Rn.9167
Nfu1	NFU1 iron-sulfur cluster scaffold homolog (S. cerevisiae)	histone cell cycle regulation defective interacting protein 5 [Source:RefSeq_peptide;Acc:NP_001100076] [ENSRNOT00000024884]	A_44_P248423	0.0423036	up	1.46678
		AI412968 EST241268 Normalized rat brain, Bento Soares Rattus sp. cDNA clone RBRED58 3' end, mRNA sequence [AI412968]	A_44_P535126	0.00977774	down	1.24981	Rn.163276
		Q7TN99_MOUSE (Q7TN99) Cytoplasmic polyadenylation element binding protein 3, partial (3%) [TC619170]	A_44_P931052	0.0361069	down	1.12827
		Rattus norvegicus partial mRNA for immunoglobulin light chain variable region, (IGLV gene), mAb192. [AJ250889]	A_44_P416845	0.0326816	down	1.40279
Rab11a	RAB11a, member RAS oncogene family"		A_44_P554799	0.0260756	down	1.35195	chr8:68933606-68933547
RGD1562107	similar to class-alpha glutathione S-transferase	PREDICTED: Rattus norvegicus similar to class-alpha glutathione S-transferase (predicted) (RGD1562107_predicted), mRNA [XM_343545]	A_43_P23287	0.0237068	down	1.14001	Rn.46642
		PREDICTED: Rattus norvegicus similar to glyceraldehyde-3-phosphate dehydrogenase (predicted) (RGD1559621_predicted), mRNA [XR_007411]	A_44_P335415	0.0477422	down	1.35542	Rn.196009
		Q24497_DROME (Q24497) Bkm protein (Fragment), partial (37%) [TC582824]	A_44_P945383	0.0254298	up	1.37287
Gpr158	G protein-coupled receptor 158	PREDICTED: Rattus norvegicus G protein-coupled receptor 158 (predicted) (Gpr158_predicted), mRNA [XM_225625]	A_44_P125471	0.0276983	down	1.0853	Rn.146822
RGD1561993	similar to Small nuclear ribonucleoprotein F (snRNP-F)	PREDICTED: Rattus norvegicus similar to Small nuclear ribonucleoprotein F (snRNP-F) (predicted) (RGD1561993_predicted), mRNA [XM_230870]	A_44_P121682	0.00444347	up	1.11358
Olr1452	olfactory receptor 1452	Rattus norvegicus olfactory receptor 1452 (Olr1452), mRNA [NM_001000773]	A_44_P208021	0.00864935	down	1.07188	Rn.142126
Phf3	PHD finger protein 3	Rattus norvegicus PHD finger protein 3 (Phf3), mRNA [NM_001108791]	A_44_P556538	0.0357678	down	1.0945	Rn.21075
		Rattus norvegicus similar to SEC14-like 1 (LOC303694), mRNA [XM_221138]	A_43_P17565	0.0303753	down	1.12157	Rn.101656
		AA851187 EST193955 Normalized rat placenta, Bento Soares Rattus sp. cDNA clone RPLAD58 3' end, mRNA sequence [AA851187]	A_44_P125420	0.0185661	down	1.47698	Rn.22314
		AI029729 UI-R-C0-jg-b-05-0-UI.s1 UI-R-C0 Rattus norvegicus cDNA clone UI-R-C0-jg-b-05-0-UI 3', mRNA sequence [AI029729]	A_44_P500328	0.0327797	down	1.14104	Rn.17101
Nppc	natriuretic peptide precursor C	Rattus norvegicus natriuretic peptide precursor C (Nppc), mRNA [NM_053750]	A_44_P240696	0.00976805	down	1.81242	Rn.10637
		AW252506 UI-R-BJ0-ada-d-03-0-UI.s1 UI-R-BJ0 Rattus norvegicus cDNA clone UI-R-BJ0-ada-d-03-0-UI 3', mRNA sequence [AW252506]	A_44_P231148	0.0240779	down	1.51023	Rn.145141
		AI230939 EST227627 Normalized rat embryo, Bento Soares Rattus sp. cDNA clone REMDD21 3' end, mRNA sequence [AI230939]	A_44_P589887	0.047394	down	1.37894	Rn.95344
Mylk2	myosin light chain kinase 2	Rattus norvegicus myosin light chain kinase 2 (Mylk2), mRNA [NM_057209]	A_44_P109443	0.0437391	down	1.30818	Rn.81191
Olr16	olfactory receptor 16	Rattus norvegicus olfactory receptor 16 (Olr16), mRNA [NM_001000694]	A_44_P200946	0.0135743	down	1.14676	Rn.141951
RGD1560040	similar to ring finger protein 2	PREDICTED: Rattus norvegicus similar to ring finger protein 2 (predicted) (RGD1560040_predicted), mRNA [XM_229087]	A_44_P398628	0.0149099	up	1.48131
Fgfr2	fibroblast growth factor receptor 2	Rattus norvegicus fibroblast growth factor receptor 2 (Fgfr2), transcript variant a, mRNA [NM_012712]	A_44_P454429	0.0421949	up	1.14569	Rn.12732
		Rattus norvegicus chromosome 4 clone RP31-108L19 strain Brown Norway, complete sequence [AC079436]	A_44_P443636	0.0297843	down	1.40795	Rn.57458
Ehbp1l1	EH domain binding protein 1-like 1	Rattus norvegicus EH domain binding protein 1-like 1 (Ehbp1l1), transcript variant 2, mRNA [NM_001129997]	A_44_P173138	0.0434486	up	1.98965	Rn.103357
Tmem86a	transmembrane protein 86A	Rattus norvegicus transmembrane protein 86A (Tmem86a), mRNA [NM_001135016]	A_44_P263740	0.0409163	down	1.0806	Rn.23056
Fbxl8	F-box and leucine-rich repeat protein 8	Rattus norvegicus F-box and leucine-rich repeat protein 8 (Fbxl8), mRNA [NM_001109128]	A_44_P308308	0.0292517	up	1.10528	Rn.144768
Olr710	olfactory receptor 710	Rattus norvegicus olfactory receptor 710 (Olr710), mRNA [NM_001000571]	A_44_P402604	0.0161173	down	1.08347	Rn.142805
RT1-CE12	RT1 class I, CE12"		A_44_P313661	0.0352049	up	1.5154	chr20_random:148081-149420
Asph	aspartate-beta-hydroxylase	Rattus norvegicus aspartate-beta-hydroxylase (Asph), mRNA [NM_001098239]	A_44_P225518	0.0421501	down	1.19651	Rn.22695
Rab12	RAB12, member RAS oncogene family"		A_44_P212178	0.0414067	up	1.15824	chr9:105624919-105624860
Zmiz2	zinc finger, MIZ-type containing 2"		A_44_P257774	0.0428538	down	1.12128	chr14:87153166-87153225
Fam70b	family with sequence similarity 70, member B"		A_42_P537051	0.028605	down	1.53724	chr16:80934931-80934872
Ubd	ubiquitin D	Rattus norvegicus ubiquitin D (Ubd), mRNA [NM_053299]	A_42_P602724	0.0029508	up	4.38343	Rn.18473
		AI577630 UI-R-AB0-vr-c-09-0-UI.s1 UI-R-AB0 Rattus norvegicus cDNA clone UI-R-AB0-vr-c-09-0-UI 3', mRNA sequence [AI577630]	A_44_P756812	0.0399993	up	1.10179	Rn.131875
Kif2c	kinesin family member 2C	AI060200 UI-R-C1-lm-a-06-0-UI.s1 UI-R-C1 Rattus norvegicus cDNA clone UI-R-C1-lm-a-06-0-UI 3', mRNA sequence [AI060200]	A_44_P425741	0.000395826	down	1.17805	Rn.152404
		BF289693 EST454284 Rat Gene Index, normalized rat, Rattus norvegicus cDNA Rattus norvegicus cDNA clone RGIHJ92, mRNA sequence [BF289693]	A_44_P681677	0.0178867	up	1.23798	Rn.15475
Alox15b	arachidonate 15-lipoxygenase, type B"		A_44_P440219	0.0142182	down	2.08962	chr10:55952161-55952102
Ttc23	tetratricopeptide repeat domain 23	Rattus norvegicus tetratricopeptide repeat domain 23 (Ttc23), mRNA [NM_001025681]	A_44_P318756	0.0225459	up	1.15639	Rn.16924
Crocc	ciliary rootlet coiled-coil, rootletin"		A_44_P504120	0.0421651	down	1.35973	chr5:159878363-159877919
Myof	myoferlin	PREDICTED: Rattus norvegicus similar to Myoferlin (Fer-1 like protein 3) (predicted) (RGD1564216_predicted), mRNA [XM_220031]	A_44_P507469	0.0268974	up	1.32805	Rn.73651
		AI233262 EST229950 Normalized rat kidney, Bento Soares Rattus sp. cDNA clone RKIDC85 3' end, mRNA sequence [AI233262]	A_44_P140846	0.0494943	down	1.27639	Rn.107154
		AI502668 UI-R-C1-la-h-10-0-UI.s1 UI-R-C1 Rattus norvegicus cDNA clone UI-R-C1-la-h-10-0-UI 3', mRNA sequence [AI502668]	A_44_P301221	0.0308151	down	1.08723	Rn.167958
			A_44_P929787	0.00633891	down	1.09839
Mcpt2	mast cell protease 2	Rattus norvegicus mast cell protease 2 (Mcpt2), mRNA [NM_172044]	A_44_P238556	0.0371498	down	1.53821	Rn.9443
Chga	chromogranin A	Rattus norvegicus chromogranin A (Chga), mRNA [NM_021655]	A_42_P616342	0.0480074	up	1.42658	Rn.41024
		EST233179 Normalized rat ovary, Bento Soares Rattus sp. cDNA clone ROVDI39 3' end, mRNA sequence [AI236617]	A_44_P947165	0.0441433	up	1.21862	Rn.204154
		AW525662 UI-R-BJ0p-aiu-d-02-0-UI.s1 UI-R-BJ0p Rattus norvegicus cDNA clone UI-R-BJ0p-aiu-d-02-0-UI 3', mRNA sequence [AW525662]	A_44_P546742	0.0262273	up	1.22512	Rn.198335
RGD1562641	similar to hypothetical protein 4930474N05	PREDICTED: Rattus norvegicus similar to hypothetical protein 4930474N05 (predicted) (RGD1562641_predicted), mRNA [XM_001064537]	A_44_P457069	0.0324086	up	1.14535
Ssh3	slingshot homolog 3 (Drosophila)	Rattus norvegicus slingshot homolog 3 (Drosophila) (Ssh3), mRNA [NM_001012217]	A_44_P805210	0.00895843	up	1.27727	Rn.12068
		Rattus norvegicus similar to mKIAA0376 protein (LOC361828), mRNA [XM_342122]	A_44_P321384	0.0294096	down	1.30528
LOC362758	similar to peptidylprolyl isomerase (cyclophilin)-like 2	PREDICTED: Rattus norvegicus similar to peptidylprolyl isomerase (cyclophilin)-like 2 (predicted) (LOC362758), mRNA [XM_001059623]	A_44_P558014	0.0490001	up	1.08378
Osbpl10	oxysterol binding protein-like 10	PREDICTED: Rattus norvegicus similar to oxysterol-binding protein-like protein 10 (predicted) (RGD1561652_predicted), mRNA [XM_243980]	A_44_P497985	0.0195173	down	1.66187	Rn.205264
Aif1	allograft inflammatory factor 1	Rattus norvegicus allograft inflammatory factor 1 (Aif1), mRNA [NM_017196]	A_44_P421534	0.0455074	up	1.26873	Rn.32080
Gja3	gap junction protein, alpha 3"		A_43_P12431	0.0281934	down	1.09697	chr15:36052712-36052653
			A_44_P640180	0.0343222	down	1.07375
			A_44_P963925	0.0131565	up	2.16046
		BG371900 UI-R-CV0-brj-f-12-0-UI.s1 UI-R-CV0 Rattus norvegicus cDNA clone UI-R-CV0-brj-f-12-0-UI 3', mRNA sequence [BG371900]	A_44_P469973	0.0329621	up	1.56294	Rn.202960
Fastkd2	FAST kinase domains 2	Rattus norvegicus FAST kinase domains 2 (Fastkd2), mRNA [NM_001009673]	A_42_P667782	0.027948	up	1.27933	Rn.24905
		AI030156 UI-R-C0-jn-g-12-0-UI.s1 UI-R-C0 Rattus norvegicus cDNA clone UI-R-C0-jn-g-12-0-UI 3', mRNA sequence [AI030156]	A_44_P343651	0.0390611	down	1.49111	Rn.13334
		BQ200761 UI-R-EB1-clq-g-15-0-UI.s1 UI-R-EB1 Rattus norvegicus cDNA clone UI-R-EB1-clq-g-15-0-UI 3', mRNA sequence [BQ200761]	A_44_P249624	0.0117433	down	1.5628	Rn.102059
Tmem30b	transmembrane protein 30B	Rattus norvegicus transmembrane protein 30B (Tmem30b), mRNA [NM_001080380]	A_44_P353157	0.0281627	up	1.33833	Rn.37764
Stx3	syntaxin 3	Rattus norvegicus syntaxin 3 (Stx3), mRNA [NM_031124]	A_44_P156513	0.0111345	up	1.0935	Rn.10951
Hsd17b3	hydroxysteroid (17-beta) dehydrogenase 3	Rattus norvegicus hydroxysteroid (17-beta) dehydrogenase 3 (Hsd17b3), mRNA [NM_054007]	A_43_P13021	0.0042675	down	1.08067	Rn.10895
Rasgrf2	RAS protein-specific guanine nucleotide-releasing factor 2	Rattus norvegicus RAS protein-specific guanine nucleotide-releasing factor 2 (Rasgrf2), mRNA [NM_053721]	A_44_P121308	0.0352308	down	1.13476	Rn.210995
Pmch	pro-melanin-concentrating hormone	Rattus norvegicus pro-melanin-concentrating hormone (Pmch), mRNA [NM_012625]	A_42_P527961	0.0422569	down	1.06738	Rn.9675
		EST351105 Rat gene index, normalized rat, norvegicus, Bento Soares Rattus norvegicus cDNA clone RGIGL59 5' end, mRNA sequence [AW919801]	A_44_P342261	0.028356	down	1.43393	Rn.55472
		Q9MX99_AULHA (Q9MX99) MHC class II alpha subunit, partial (5%) [TC623486]	A_44_P762950	0.0368295	up	1.53273
		BQ192168 UI-R-DY0-cmi-k-22-0-UI.s1 NCI_CGAP_DY0 Rattus norvegicus cDNA clone IMAGE:7329264 3', mRNA sequence [BQ192168]	A_44_P132293	0.0454328	down	1.29126	Rn.105739
		AI176590 EST220178 Normalized rat ovary, Bento Soares Rattus sp. cDNA clone ROVBU25 3' end, mRNA sequence [AI176590]	A_44_P507829	0.0367438	down	1.25614	Rn.11978
Ankrd15	ankyrin repeat domain 15	Rattus norvegicus ankyrin repeat domain 15 (Ankrd15), mRNA [NM_001037197]	A_44_P315626	0.0200978	up	1.15394	Rn.86207
Htt	huntingtin	Rattus norvegicus huntingtin (Htt), mRNA [NM_024357]	A_44_P316136	0.0421486	down	1.13104	Rn.11193
		AI501681 UI-R-C0-iv-a-05-0-UI.s1 UI-R-C0 Rattus norvegicus cDNA clone UI-R-C0-iv-a-05-0-UI 3', mRNA sequence [AI501681]	A_44_P145374	0.0279003	up	1.11689	Rn.116338
		AA996957 UI-R-C0-hk-e-09-0-UI.s1 UI-R-C0 Rattus norvegicus cDNA clone UI-R-C0-hk-e-09-0-UI 3', mRNA sequence [AA996957]	A_44_P158235	0.0306957	down	1.10889	Rn.3318
		Rattus norvegicus similar to Putative deoxyribonuclease KIAA0218 (LOC302508), mRNA [XM_228696]	A_44_P536843	0.0362793	down	1.15897
		AI237691 EST234253 Normalized rat placenta, Bento Soares Rattus sp. cDNA clone RPLDC62 3' end, mRNA sequence [AI237691]	A_44_P275990	0.0257209	down	1.51589	Rn.129730
		BM382871 UI-R-BT1-bko-g-09-0-UI.s1 UI-R-BT1 Rattus norvegicus cDNA clone UI-R-BT1-bko-g-09-0-UI 3', mRNA sequence [BM382871]	A_44_P319660	0.0302563	down	1.11789	Rn.143976
		Rattus norvegicus similar to RIKEN cDNA 4933431D05 (LOC363352), mRNA [XM_343688]	A_44_P443377	0.0329987	down	1.17939
Kdr	kinase insert domain protein receptor	Rattus norvegicus kinase insert domain protein receptor (Kdr), mRNA [NM_013062]	A_43_P11686	0.0262141	down	1.08606	Rn.88869
		mannan-binding lectin serine peptidase 1 [Source:RefSeq_peptide;Acc:NP_071593] [ENSRNOT00000002512]	A_44_P531741	0.00556676	down	1.13992	Rn.203236
Nxf1	nuclear RNA export factor 1	Rattus norvegicus nuclear RNA export factor 1 (Nxf1), mRNA [NM_021579]	A_42_P644929	0.0245055	up	1.17292	Rn.159847
			A_44_P577723	0.0114586	up	1.24761
Fip1l1	FIP1 like 1 (S. cerevisiae)	Rattus norvegicus FIP1 like 1 (S. cerevisiae) (Fip1l1), mRNA [NM_001008295]	A_44_P496788	0.0192966	up	1.15669	Rn.138993
RGD1562161	similar to chromosome X open reading frame 23	Rattus norvegicus similar to chromosome X open reading frame 23 (RGD1562161), mRNA [NM_001127568]	A_44_P683487	0.0232544	up	1.18022	Rn.214618
		Rattus norvegicus similar to Grhl1-pending protein (LOC313993), mRNA [XM_234006]	A_44_P286341	0.00771216	down	1.23347	Rn.212889
Satb1	SATB homeobox 1	Rattus norvegicus SATB homeobox 1 (Satb1), mRNA [NM_001012129]	A_43_P22657	0.00275887	up	1.49163	Rn.21462
Nfs1	NFS1 nitrogen fixation 1 homolog (S. cerevisiae)	Rattus norvegicus NFS1 nitrogen fixation 1 homolog (S. cerevisiae) (Nfs1), nuclear gene encoding mitochondrial protein, mRNA [NM_053462]	A_44_P351159	0.013624	up	1.18991	Rn.3151
		AI233993 EST230681 Normalized rat lung, Bento Soares Rattus sp. cDNA clone RLUCT82 3' end, mRNA sequence [AI233993]	A_44_P228236	0.0421347	down	1.20935	Rn.202984
		AI009397 EST203848 Normalized rat heart, Bento Soares Rattus sp. cDNA clone RHEBJ48 3' end, mRNA sequence [AI009397]	A_44_P303052	0.00392363	up	1.11139	Rn.7699
Mtmr3	myotubularin related protein 3	Rattus norvegicus myotubularin related protein 3 (Mtmr3), mRNA [NM_001012038]	A_44_P209604	0.0381541	down	1.29558	Rn.8338
		AI599699 EST251402 Normalized rat embryo, Bento Soares Rattus sp. cDNA clone REMEG20 3' end, mRNA sequence [AI599699]	A_44_P177146	0.0356935	down	1.09928	Rn.54645
		BF398450 UI-R-BS2-bep-a-03-0-UI.s1 UI-R-BS2 Rattus norvegicus cDNA clone UI-R-BS2-bep-a-03-0-UI 3', mRNA sequence [BF398450]	A_44_P129793	0.0294966	down	1.38226	Rn.17921
		PRP18 pre-mRNA processing factor 18 homolog (yeast) (Prpf18), mRNA [Source:RefSeq_dna;Acc:NM_138523] [ENSRNOT00000000022]	A_44_P428863	0.0377343	down	1.26419	Rn.18972
Dfnb59	deafness, autosomal recessive 59 (human)"		A_44_P382274	0.0409729	up	1.83811	chr3:59350039-59350098
Actrt2	actin-related protein T2	Rattus norvegicus actin-related protein T2 (Actrt2), mRNA [NM_001013937]	A_44_P105554	0.0245209	down	1.1016	Rn.119400
		AI411274 EST239568 Normalized rat kidney, Bento Soares Rattus sp. cDNA clone RKIEO78 3' end, mRNA sequence [AI411274]	A_44_P207536	0.0131325	down	1.55173	Rn.46830
Hip1	huntingtin interacting protein 1	Rattus norvegicus huntingtin interacting protein 1 (Hip1), mRNA [NM_001100475]	A_44_P503022	0.0208651	up	1.56347	Rn.836
		BF549650 UI-R-C2-ng-a-06-0-UI.r1 UI-R-C2 Rattus norvegicus cDNA clone UI-R-C2-ng-a-06-0-UI 5', mRNA sequence [BF549650]	A_44_P355620	0.0178939	up	1.13282	Rn.165814
			A_44_P828870	0.040722	down	1.1057
Tfg	Trk-fused gene	Rattus norvegicus Trk-fused gene (Tfg), mRNA [NM_001012144]	A_44_P408187	0.0379565	down	1.1327	Rn.24822
Pde4c	phosphodiesterase 4C, cAMP-specific (phosphodiesterase E1 dunce homolog, Drosophila)"		A_44_P477777	0.0361284	down	1.52316	chr16:19198516-19198457
LOC360902	similar to actin, gamma 2, smooth muscle, enteric	PREDICTED: Rattus norvegicus similar to actin, gamma 2, smooth muscle, enteric (LOC360902), mRNA [XR_005722]	A_44_P958966	0.018816	up	1.17459	Rn.160875
		AI411374 EST239668 Normalized rat kidney, Bento Soares Rattus sp. cDNA clone RKIES28 3' end, mRNA sequence [AI411374]	A_44_P705482	0.0467958	down	1.2645	Rn.28354
		Q2JKD2_SYNJB (Q2JKD2) Homoserine kinase , partial (5%) [TC609600]	A_44_P702964	0.0281925	up	1.5711
		BF567847 UI-R-BO0-ahn-e-05-0-UI.r1 UI-R-BO0 Rattus norvegicus cDNA clone UI-R-BO0-ahn-e-05-0-UI 5', mRNA sequence [BF567847]	A_44_P407020	0.0421214	up	1.44344	Rn.121539
Raph1	Ras association (RalGDS/AF-6) and pleckstrin homology domains 1	Rattus norvegicus Ras association (RalGDS/AF-6) and pleckstrin homology domains 1 (Raph1), mRNA [NM_001108798]	A_44_P1027405	0.0138866	up	1.11408	Rn.16844
		BF417010 UI-R-CN0-bkw-h-08-0-UI.s1 UI-R-CN0 Rattus norvegicus cDNA clone UI-R-CN0-bkw-h-08-0-UI 3', mRNA sequence [BF417010]	A_44_P450589	0.0129362	down	1.09665	Rn.23448
		AI407002 EST235290 Normalized rat ovary, Bento Soares Rattus sp. cDNA clone ROVDV15 3' end, mRNA sequence [AI407002]	A_44_P479472	0.0270239	down	1.13943
LOC310385	similar to heat shock protein 8	PREDICTED: Rattus norvegicus similar to heat shock protein 8 (LOC310385), mRNA [XR_006667]	A_44_P501483	0.0372075	up	1.7742	Rn.216235
			A_44_P702891	0.0493929	up	1.35145
Gng7	guanine nucleotide binding protein (G protein), gamma 7"		A_44_P235926	0.00199813	up	1.05074	chr7:10271041-10271100
Elovl7	ELOVL family member 7, elongation of long chain fatty acids (yeast)"		A_44_P914760	0.0158162	down	2.07717	chr2:39597639-39597698
			A_44_P668359	0.016994	down	1.06899
Lrrc55	leucine rich repeat containing 55	Rattus norvegicus similar to expressed sequence AI841794 (LOC311171), mRNA [XM_230055]	A_44_P534443	0.0292841	down	1.32659
		RBAG18-2 wister rat brain abscess Rattus norvegicus cDNA 3', mRNA sequence [CN382817]	A_44_P828432	0.036553	up	1.28516	Rn.24826
Rprd1a	regulation of nuclear pre-mRNA domain containing 1A	PREDICTED: Rattus norvegicus similar to hypothetical protein MGC36325 (predicted) (RGD1307374_predicted), mRNA [XM_214609]	A_44_P328489	0.0307782	down	1.38263	Rn.162287
		AI713966 UI-R-AB1-yt-h-04-0-UI.s1 UI-R-AB1 Rattus norvegicus cDNA clone UI-R-AB1-yt-h-04-0-UI 3', mRNA sequence [AI713966]	A_44_P366883	0.0466728	down	1.57356	Rn.26369
		BQ200332 UI-R-DZ1-cnd-c-09-0-UI.s1 NCI_CGAP_DZ1 Rattus norvegicus cDNA clone IMAGE:7344035 3', mRNA sequence [BQ200332]	A_44_P439687	0.0435147	down	1.09743	Rn.9347
		Ig delta chain C region (Fragment). [Source:UniProtKB/Swiss-Prot;Acc:P01883] [ENSRNOT00000056837]	A_44_P381808	0.0185409	up	1.35085	Rn.10956
		AA799762 EST189259 Normalized rat heart, Bento Soares Rattus sp. cDNA clone RHEAF06 3' end, mRNA sequence [AA799762]	A_44_P118468	0.0229741	down	1.64494	Rn.1389
Tnfrsf25	tumor necrosis factor receptor superfamily, member 25"		A_44_P206399	0.00453153	down	1.11407	chr5:169347259-169347318
Ostbeta	organic solute transporter beta	PREDICTED: Rattus norvegicus similar to organic solute transporter beta (predicted) (RGD1565748_predicted), mRNA [XM_001076555]	A_44_P312026	0.0240091	down	1.35668	Rn.106908
		BQ781257 UI-R-FF0-cpe-k-11-0-UI.s1 NCI_CGAP_FF0 Rattus norvegicus cDNA clone UI-R-FF0-cpe-k-11-0-UI 3', mRNA sequence [BQ781257]	A_44_P530570	0.0173981	down	1.4915	Rn.164554
		CB547618 AMGNNUC:NRDG1-00179-C2-A nrdg1 (10855) Rattus norvegicus cDNA clone nrdg1-00179-c2 5', mRNA sequence [CB547618]	A_44_P514140	0.0155305	up	1.24824	Rn.220617
LOC499224	similar to eukaryotic translation elongation factor 1 alpha 2	PREDICTED: Rattus norvegicus similar to eukaryotic translation elongation factor 1 alpha 2 (LOC499224), mRNA [XR_006664]	A_44_P958992	0.00354983	up	2.0277	Rn.197951
Fam164a	family with sequence similarity 164, member A"		A_44_P704874	0.045255	up	1.33205	chr2:96408420-96408361
		Rattus norvegicus MARRLC9A mRNA, partial cds. [AF010444]	A_44_P503516	0.00426128	down	1.17404
Dleu7	deleted in lymphocytic leukemia, 7"		A_44_P1019291	0.0409783	down	1.66898	chr15:41493162-41493103
		CR753965 Rattus norvegicus muscle Sprague-Dawley Rattus norvegicus cDNA clone GP0AAA15ZA09, mRNA sequence [CR753965]	A_44_P233063	0.00548494	down	1.31579	Rn.12284
		AI172261 EST218261 Normalized rat muscle, Bento Soares Rattus sp. cDNA clone RMUBX03 3' end, mRNA sequence [AI172261]	A_44_P453465	0.0347567	down	1.28309	Rn.9459
RGD1560119	similar to actin alpha 1 skeletal muscle protein	PREDICTED: Rattus norvegicus similar to actin alpha 1 skeletal muscle protein (predicted) (RGD1560119_predicted), mRNA [XR_008328]	A_44_P393985	0.0245389	up	1.19885	Rn.196038
Iscu	iron-sulfur cluster scaffold homolog (E. coli)	Rattus norvegicus iron-sulfur cluster scaffold homolog (E. coli) (Iscu), nuclear gene encoding mitochondrial protein, mRNA [NM_001105936]	A_44_P112043	0.00593425	up	1.16955	Rn.121
		AI045973 UI-R-C1-jt-b-07-0-UI.s1 UI-R-C1 Rattus norvegicus cDNA clone UI-R-C1-jt-b-07-0-UI 3', mRNA sequence [AI045973]	A_44_P334111	0.02798	down	1.33498	Rn.73878
Olr136	olfactory receptor 136	Rattus norvegicus olfactory receptor 136 (Olr136), mRNA [NM_001000160]	A_44_P477720	0.0225098	down	1.04744	Rn.141861
		AA946110 EST201609 Normalized rat lung, Bento Soares Rattus sp. cDNA clone RLUBB34 3' end, mRNA sequence [AA946110]	A_44_P940810	0.0161817	down	1.16094	Rn.134664
RGD1308461	similar to RIKEN cDNA 4632415K11	Rattus norvegicus similar to RIKEN cDNA 4632415K11 (LOC307901), mRNA [XM_226525]	A_44_P459543	0.0193707	down	1.65669	Rn.199070
Rnf182	ring finger protein 182	Rattus norvegicus ring finger protein 182 (Rnf182), mRNA [NM_001109117]	A_44_P504568	0.0148938	down	1.11775	Rn.141306
Olr229	olfactory receptor 229	Rattus norvegicus olfactory receptor 229 (Olr229), mRNA [NM_001000204]	A_44_P458945	0.0187862	down	1.16931	Rn.141789
		UI-R-BS1-ayz-g-09-0-UI.s1 UI-R-BS1 Rattus norvegicus cDNA clone UI-R-BS1-ayz-g-09-0-UI 3', mRNA sequence [BE108909]	A_44_P883950	0.00751488	up	1.14758	Rn.171168
			A_44_P576834	0.00275631	up	1.20927
Fkbp9	FK506 binding protein 9, 63 kDa"		A_44_P145416	0.0420769	up	1.42701	chr4:85854885-85859723
B4galt1	UDP-Gal:betaGlcNAc beta 1,4- galactosyltransferase, polypeptide 1"		A_44_P879764	0.0464551	up	1.28795	chr5:58197268-58197209
		BF555973 UI-R-A1-dy-a-07-0-UI.r1 UI-R-A1 Rattus norvegicus cDNA clone UI-R-A1-dy-a-07-0-UI 5', mRNA sequence [BF555973]	A_43_P15107	0.0472633	up	1.40108	Rn.203452
LOC501349	hypothetical LOC501349	PREDICTED: Rattus norvegicus hypothetical LOC501349 (LOC501349), mRNA [XM_001073636]	A_44_P335578	0.0372299	up	1.18602
Aloxe3	arachidonate lipoxygenase 3	Rattus norvegicus arachidonate lipoxygenase 3 (Aloxe3), mRNA [NM_001105793]	A_44_P110400	0.0447182	down	1.27675	Rn.8716
Pdlim7	PDZ and LIM domain 7	Rattus norvegicus PDZ and LIM domain 7 (Pdlim7), mRNA [NM_173125]	A_44_P374068	0.00668686	down	1.10891	Rn.7274
		AI454498 UI-R-E0-br-a-08-0-UI.s1 UI-R-E0 Rattus norvegicus cDNA clone UI-R-E0-br-a-08-0-UI 3', mRNA sequence [AI454498]	A_44_P505188	0.00687591	down	1.55	Rn.98152
		BF284253 EST448844 Rat Gene Index, normalized rat, Rattus norvegicus cDNA Rattus norvegicus cDNA clone RGIEN45 3' sequence, mRNA sequence [BF284253]	A_44_P151179	0.046634	down	1.14596	Rn.6534
		AGENCOURT_28540268 NIH_MGC_249 Rattus norvegicus cDNA clone IMAGE:7375741 5', mRNA sequence [CO561061]	A_44_P751482	0.00837557	up	1.07631	Rn.16560
RT1-Aw2	RT1 class Ib, locus Aw2"		A_44_P390172	0.0234942	up	1.831	chr20:2870185-2870244
		703769975J1 RALUTXL01 Rattus norvegicus cDNA, mRNA sequence [BU946561]	A_44_P237484	0.0364346	down	1.39374	Rn.16756
Runx3	runt-related transcription factor 3	Rattus norvegicus runt-related transcription factor 3 (Runx3), mRNA [NM_130425]	A_43_P13119	0.00731406	down	1.06603	Rn.205217
LOC690217	similar to B0511.12	PREDICTED: Rattus norvegicus similar to RIKEN cDNA 1810048J11 (predicted) (RGD1305147_predicted), mRNA [XR_009392]	A_43_P23201	0.022402	up	1.88571	Rn.203450
Mon2	MON2 homolog (yeast)	Mon2 protein. [Source:UniProtKB/TrEMBL;Acc:Q3KR70] [ENSRNOT00000045130]	A_44_P291088	0.0155904	up	1.15254	Rn.154642
		CB544459 AMGNNUC:NRHW1-00004-D8-A W rat hypo+pit (10478) Rattus norvegicus cDNA clone nrhw1-00004-d8 5', mRNA sequence [CB544459]	A_44_P296084	0.0462009	down	1.11008	Rn.8671
		BI275187 UI-R-CX0-bxc-e-11-0-UI.s1 UI-R-CX0 Rattus norvegicus cDNA clone UI-R-CX0-bxc-e-11-0-UI 3', mRNA sequence [BI275187]	A_44_P115250	0.0315251	up	1.1565	Rn.45038
Psp	parotid secretory protein	Rattus norvegicus parotid secretory protein (Psp), mRNA [NM_052808]	A_43_P12746	0.00265405	up	1.43748	Rn.9766
Slamf9	SLAM family member 9	Rattus norvegicus SLAM family member 9 (Slamf9), mRNA [NM_001105971]	A_42_P565621	0.0216879	up	1.56927	Rn.205911
		AI234113 EST230801 Normalized rat lung, Bento Soares Rattus sp. cDNA clone RLUCV36 3' end, mRNA sequence [AI234113]	A_44_P554620	0.0345629	down	1.45843	Rn.1975
		BF556412 UI-R-A1-eq-d-08-0-UI.r1 UI-R-A1 Rattus norvegicus cDNA clone UI-R-A1-eq-d-08-0-UI 5', mRNA sequence [BF556412]	A_44_P507053	0.0341202	down	1.25876	Rn.211887
		AI136102 UI-R-C2p-ny-b-07-0-UI.s1 UI-R-C2p Rattus norvegicus cDNA clone UI-R-C2p-ny-b-07-0-UI 3', mRNA sequence [AI136102]	A_44_P444469	0.0211019	down	1.37192	Rn.162750
RGD1564752	RGD1564752	PREDICTED: Rattus norvegicus RGD1564752 (predicted) (RGD1564752_predicted), mRNA [XM_347101]	A_44_P476076	0.0350818	down	1.16454	Rn.15978
		AA964832 UI-R-C0-gx-c-03-0-UI.s1 UI-R-C0 Rattus norvegicus cDNA clone UI-R-C0-gx-c-03-0-UI 3', mRNA sequence [AA964832]	A_44_P1057658	0.00562132	up	1.26118	Rn.164799
Nnat	neuronatin	Rattus norvegicus neuronatin (Nnat), transcript variant 1, mRNA [NM_053601]	A_44_P508066	0.0229409	up	1.3304	Rn.5785
		BQ190629 UI-R-DN1-ckh-d-14-0-UI.s1 UI-R-DN1 Rattus norvegicus cDNA clone UI-R-DN1-ckh-d-14-0-UI 3', mRNA sequence [BQ190629]	A_44_P542249	0.048894	up	1.46754	Rn.219103
			A_44_P563970	0.00458049	up	1.38961
Ptgfr	prostaglandin F receptor	Rattus norvegicus prostaglandin F receptor (Ptgfr), mRNA [NM_013115]	A_44_P307625	0.0326778	up	1.17194	Rn.97602
			A_44_P577066	0.0127681	up	1.10817
			A_44_P124243	0.032345	down	1.15669
		UI-R-EP0-coc-f-22-0-UI.s1 UI-R-EP0 Rattus norvegicus cDNA clone UI-R-EP0-coc-f-22-0-UI 3', mRNA sequence [BQ208403]	A_44_P875024	0.0229845	down	1.24642	Rn.40322
Xpo1	exportin 1, CRM1 homolog (yeast)"		A_44_P217266	0.0247797	up	1.16771	chr14:103976417-103976559
		BQ200056 UI-R-EA0-clm-i-20-0-UI.s1 UI-R-EA0 Rattus norvegicus cDNA clone UI-R-EA0-clm-i-20-0-UI 3', mRNA sequence [BQ200056]	A_44_P171427	0.0209372	up	1.07288	Rn.41038
Elmo3	engulfment and cell motility 3	Rattus norvegicus engulfment and cell motility 3 (Elmo3), mRNA [NM_001030028]	A_44_P1013007	0.0276763	up	1.22747	Rn.151249
			A_44_P631305	0.045936	up	1.10285
		BF566116 UI-R-BT1-ajy-h-04-0-UI.r1 UI-R-BT1 Rattus norvegicus cDNA clone UI-R-BT1-ajy-h-04-0-UI 5', mRNA sequence [BF566116]	A_44_P143982	0.0386916	up	1.39916	Rn.166161
LOC680782	similar to signal peptidase complex subunit 3 homolog	Rattus norvegicus clone UI-R-FJ0-cpu-m-15-0-UI unknown mRNA [AY724480]	A_44_P935923	0.0187483	up	1.17638	Rn.29528
Igf2bp2	insulin-like growth factor 2 mRNA binding protein 2	PREDICTED: Rattus norvegicus similar to IGF-II mRNA-binding protein 2 (predicted) (RGD1305614_predicted), mRNA [XM_221343]	A_44_P1047467	0.0166386	down	3.56604	Rn.17318
Cip98	CASK-interacting protein CIP98	Rattus norvegicus CASK-interacting protein CIP98 (Cip98), mRNA [NM_181088]	A_44_P165513	0.0456801	up	1.22372	Rn.204268
			A_44_P724334	0.0122459	down	1.27645
		BF386460 UI-R-CA1-bbe-c-03-0-UI.s1 UI-R-CA1 Rattus norvegicus cDNA clone UI-R-CA1-bbe-c-03-0-UI 3', mRNA sequence [BF386460]	A_44_P371239	0.00367279	down	1.12254	Rn.65998
Srpx2	sushi-repeat-containing protein, X-linked 2"		A_42_P728794	0.0214004	up	1.69696	chrX:121468224-121468283
		RVL22599 Wackym-Soares normalized rat vestibular cDNA library Rattus norvegicus cDNA 5', mRNA sequence [DY471410]	A_44_P745524	0.00656286	down	1.20136	Rn.164718
RT1-CE4	RT1 class I, CE4"		A_44_P440517	0.0173558	up	1.71376	chr20:3537402-3537343
		AI235446 EST232008 Normalized rat ovary, Bento Soares Rattus sp. cDNA clone ROVCR88 3' end, mRNA sequence [AI235446]	A_44_P324189	0.0475988	down	1.17311	Rn.8461
LOC499234	similar to NACHT, leucine rich repeat and PYD containing 14-like"		A_44_P144705	0.0424052	down	1.29108	chr1:164528674-164528733
		BQ782568 UI-R-FF0-cpk-h-15-0-UI.s1 NCI_CGAP_FF0 Rattus norvegicus cDNA clone UI-R-FF0-cpk-h-15-0-UI 3', mRNA sequence [BQ782568]	A_44_P395147	0.0407577	down	1.1199	Rn.3472
		UI-R-DZ0-cmz-a-24-0-UI.s1 UI-R-DZ0 Rattus norvegicus cDNA clone UI-R-DZ0-cmz-a-24-0-UI 3', mRNA sequence [CN541273]	A_44_P869077	0.0252074	up	1.38475	Rn.187073
Hspa4	heat shock protein 4	Rattus norvegicus heat shock protein 4 (Hspa4), mRNA [NM_153629]	A_42_P625181	0.0169751	up	1.51711	Rn.163092
		Rattus norvegicus similar to hypothetical protein FLJ12969 (LOC317403), mRNA [XM_228818]	A_44_P335552	0.0491788	up	1.4546
Plcxd2	phosphatidylinositol-specific phospholipase C, X domain containing 2"		A_44_P914151	0.0132509	down	1.09882	chr11:56334790-56334849
		AA874884 UI-R-E0-ci-g-07-0-UI.s1 UI-R-E0 Rattus norvegicus cDNA clone UI-R-E0-ci-g-07-0-UI 3' similar to gi [AA874884]	A_44_P280123	0.0178724	down	1.1427	Rn.3160
Oxct2a	3-oxoacid CoA transferase 2A	Rattus norvegicus 3-oxoacid CoA transferase 2A (Oxct2a), mRNA [NM_001012221]	A_44_P520737	0.0189223	down	1.19958	Rn.110620
Gas2	growth arrest-specific 2	Rattus norvegicus growth arrest-specific 2 (Gas2), mRNA [NM_001127504]	A_44_P930534	0.001942	down	1.48893	Rn.19800
Olr491	olfactory receptor 491	Rattus norvegicus olfactory receptor 491 (Olr491), mRNA [NM_001000932]	A_44_P419056	0.0207889	down	1.02684	Rn.142949
		Rattus norvegicus similar to KRAB-zinc finger protein KZF-2 (LOC361193), mRNA [XM_341476]	A_44_P532145	0.019296	down	1.20438
Tmem5	transmembrane protein 5	Rattus norvegicus transmembrane protein 5 (Tmem5), mRNA [NM_001024759]	A_42_P618256	0.0411093	up	1.18299	Rn.161056
Oas1i	2 ' -5 ' oligoadenylate synthetase 1I	Rattus norvegicus 2 ' -5 ' oligoadenylate synthetase 1I (Oas1i), mRNA [NM_001009680]	A_44_P226999	0.0207636	up	1.70797	Rn.203133
Serinc2	serine incorporator 2	Rattus norvegicus serine incorporator 2 (Serinc2), mRNA [NM_001031656]	A_42_P672545	0.0214004	down	1.06774	Rn.144273
Marveld1	MARVEL domain containing 1	Rattus norvegicus MARVEL domain containing 1 (Marveld1), mRNA [NM_001107590]	A_44_P102822	0.0303186	down	1.31361	Rn.1215
		PDZ and LIM domain protein 3 (Actinin-associated LIM protein) (Alpha- actinin-2-associated LIM protein) (SK-2). [Source:UniProtKB/Swiss-Prot;Acc:Q66HS7] [ENSRNOT00000017568]	A_44_P447158	0.0446508	up	1.43005	Rn.13361
			A_44_P674879	0.00175374	down	1.10826
Vps8	vacuolar protein sorting 8 homolog (S. cerevisiae)	Rattus norvegicus similar to mKIAA0804 protein (LOC287990), mRNA [XM_221315]	A_44_P387374	0.0213614	down	1.14696	Rn.63502
Ccdc109b	coiled-coil domain containing 109B	PREDICTED: Rattus norvegicus similar to hypothetical protein FLJ20647 (predicted) (RGD1305326_predicted), mRNA [XM_215707]	A_44_P1031063	0.0108157	down	1.20659	Rn.35486
Sele	selectin, endothelial cell"		A_44_P291264	0.0360182	down	1.88978	chr13:79822442-79822501
Olr477	olfactory receptor 477	Rattus norvegicus olfactory receptor 477 (Olr477), mRNA [NM_001000304]	A_44_P205691	0.0409691	down	1.08026	Rn.142960
RT1-M6-2	RT1 class I, M6, gene 2"		A_44_P309052	0.0462797	up	1.5898	chr20:1677337-1677396
		BI302702 UI-R-DO0-cix-l-18-0-UI.s1 UI-R-DO0 Rattus norvegicus cDNA clone UI-R-DO0-cix-l-18-0-UI 3', mRNA sequence [BI302702]	A_44_P192698	0.0401973	down	1.22694	Rn.204848
		BQ209292 UI-R-DY1-cnt-o-18-0-UI.s1 NCI_CGAP_DY1 Rattus norvegicus cDNA clone IMAGE:7334732 3', mRNA sequence [BQ209292]	A_44_P469938	0.0185758	up	1.18642	Rn.205127
		UI-R-BT1-aqj-b-10-0-UI.s1 UI-R-BT1 Rattus norvegicus cDNA clone UI-R-BT1-aqj-b-10-0-UI 3', mRNA sequence [BE102085]	A_44_P677625	0.0376529	down	1.10259	Rn.156868
		BF284373 EST448964 Rat Gene Index, normalized rat, Rattus norvegicus cDNA Rattus norvegicus cDNA clone RGIEO86 3' sequence, mRNA sequence [BF284373]	A_44_P257011	0.0382956	down	1.18977	Rn.203314
Slitrk2	SLIT and NTRK-like family, member 2"		A_44_P457342	0.0245813	down	1.01875	chrX:152671444-152671503
Adam8	ADAM metallopeptidase domain 8	PREDICTED: Rattus norvegicus similar to cysteine-rich glycoprotein (predicted) (RGD1566394_predicted), mRNA [XM_574584]	A_43_P21977	0.0453373	down	1.15794	Rn.106061
		BF390318 UI-R-CA1-bcn-e-06-0-UI.s1 UI-R-CA1 Rattus norvegicus cDNA clone UI-R-CA1-bcn-e-06-0-UI 3', mRNA sequence [BF390318]	A_44_P139437	0.01551	up	1.24174	Rn.58641
Gng11	guanine nucleotide binding protein (G protein), gamma 11"		A_44_P440600	0.00839214	down	1.54017	chr4:28852088-28852147
		BQ202175 UI-R-EB1-cle-p-13-0-UI.s1 UI-R-EB1 Rattus norvegicus cDNA clone UI-R-EB1-cle-p-13-0-UI 3', mRNA sequence [BQ202175]	A_44_P491446	0.0369367	down	1.41275	Rn.55597
		Rattus norvegicus (hybridoma 56R-9) immunoglobulin rearranged gamma-chain mRNA variable (V) region, partial cds. [L07400]	A_44_P513084	0.0200777	down	1.25164	Rn.200554
Slc7a6	solute carrier family 7 (cationic amino acid transporter, y+ system), member 6"		A_44_P525364	0.0158194	down	1.14531	chr19:36044944-36045864
		BF387477 UI-R-CA1-bbm-h-05-0-UI.s1 UI-R-CA1 Rattus norvegicus cDNA clone UI-R-CA1-bbm-h-05-0-UI 3', mRNA sequence [BF387477]	A_44_P216543	0.0482484	up	1.06053	Rn.25073
Hnrpm	heterogeneous nuclear ribonucleoprotein M	Rattus norvegicus heterogeneous nuclear ribonucleoprotein M (Hnrpm), transcript variant 2, mRNA [NM_053876]	A_43_P15645	0.00882674	up	1.14785	Rn.10156
Recql5	RecQ protein-like 5	Rattus norvegicus RecQ protein-like 5 (Recql5), mRNA [NM_001105853]	A_42_P623013	0.0206404	down	1.13332	Rn.198916
Mcart1	mitochondrial carrier triple repeat 1	Rattus norvegicus mitochondrial carrier triple repeat 1 (Mcart1), nuclear gene encoding mitochondrial protein, mRNA [NM_001024785]	A_44_P792034	0.00851477	up	1.20051	Rn.18405
RT1-CE1	RT1 class I, CE1"		A_44_P513029	0.0398603	up	1.68249	chr20:3595784-3595725
Mlana	melan-A	Rattus norvegicus melan-A (Mlana), mRNA [NM_001106348]	A_44_P1021535	0.0374598	down	1.09376	Rn.12340
Arntl2	aryl hydrocarbon receptor nuclear translocator-like 2	Rattus norvegicus brain-muscle-ARNT-like protein 2a (Bmal2) mRNA, partial cds; alternatively spliced [AF327071]	A_44_P389444	0.0193731	down	1.24409	Rn.41612
Jmjd3	jumonji domain containing 3	Rattus norvegicus jumonji domain containing 3 (Jmjd3), mRNA [NM_001108829]	A_43_P21709	0.0430836	down	1.28122	Rn.205533
Pnpla2	patatin-like phospholipase domain containing 2	Rattus norvegicus patatin-like phospholipase domain containing 2 (Pnpla2), mRNA [NM_001108509]	A_44_P515640	0.0410306	up	1.24607	Rn.19196
		AA923830 UI-R-A1-dr-e-03-0-UI.s1 UI-R-A1 Rattus norvegicus cDNA clone UI-R-A1-dr-e-03-0-UI 3', mRNA sequence [AA923830]	A_44_P516209	0.00773757	down	1.09714	Rn.133809
Pfn2	profilin 2	Rattus norvegicus profilin 2 (Pfn2), mRNA [NM_030873]	A_42_P581863	0.0112582	up	1.35855	Rn.203100
		Rattus norvegicus similar to nuclear autoantigenic sperm protein; NASP (LOC298441), mRNA [XM_216505]	A_44_P1048004	0.0388855	down	1.36498
		AI101197 EST210486 Normalized rat brain, Bento Soares Rattus sp. cDNA clone RBRBG76 3' end, mRNA sequence [AI101197]	A_44_P682087	0.00712563	down	1.36762
A2bp1	ataxin 2 binding protein 1	Rattus norvegicus ataxin 2 binding protein 1 (A2bp1), mRNA [NM_001106974]	A_44_P127784	0.00031511	down	1.28084	Rn.92540
		UI-R-CN1-cma-o-10-0-UI.s1 UI-R-CN1 Rattus norvegicus cDNA clone UI-R-CN1-cma-o-10-0-UI 3', mRNA sequence [CV795283]	A_44_P980898	0.0203433	down	1.3205	Rn.164558
		BF548061 UI-R-A0-bh-f-08-0-UI.r1 UI-R-A0 Rattus norvegicus cDNA clone UI-R-A0-bh-f-08-0-UI 5', mRNA sequence [BF548061]	A_44_P941990	0.0313442	up	1.11393	Rn.22097
		BE100678 UI-R-BJ1-atu-b-06-0-UI.s1 UI-R-BJ1 Rattus norvegicus cDNA clone UI-R-BJ1-atu-b-06-0-UI 3', mRNA sequence [BE100678]	A_44_P126715	0.0480389	down	1.179	Rn.18919
		UI-R-EP0-cnx-l-20-0-UI.s1 UI-R-EP0 Rattus norvegicus cDNA clone UI-R-EP0-cnx-l-20-0-UI 3', mRNA sequence [BQ209491]	A_44_P218695	0.00949087	down	1.44376	Rn.4165
			A_44_P722210	0.0410341	up	1.34036
			A_44_P673362	0.0294945	up	1.29109
			A_44_P746741	0.0184684	up	1.12827
		AW251678 UI-R-BJ0-adp-f-03-0-UI.s1 UI-R-BJ0 Rattus norvegicus cDNA clone UI-R-BJ0-adp-f-03-0-UI 3', mRNA sequence [AW251678]	A_44_P449215	0.00916511	down	1.40071	Rn.107880
Col4a3bp	collagen, type IV, alpha 3 (Goodpasture antigen) binding protein"		A_44_P399459	0.0183185	up	1.62652	chr2:27116183-27116242
Ddx58	DEAD (Asp-Glu-Ala-Asp) box polypeptide 58	Rattus norvegicus DEAD (Asp-Glu-Ala-Asp) box polypeptide 58 (Ddx58), mRNA [NM_001106645]	A_44_P576954	0.0208057	up	1.41718	Rn.38642
RGD1565095	similar to hypothetical protein MGC52110	PREDICTED: Rattus norvegicus similar to hypothetical protein MGC52110 (predicted) (RGD1565095_predicted), mRNA [XM_578786]	A_44_P1018662	0.0323452	up	1.59685	Rn.3412
			A_44_P563281	0.0118379	down	1.09736
Cpe	carboxypeptidase E	Rattus norvegicus carboxypeptidase E (Cpe), mRNA [NM_013128]	A_44_P204704	0.0428379	up	1.23196	Rn.7149
		O26923_METTH (O26923) Conserved protein, partial (5%) [TC593244]	A_44_P915624	0.0309118	up	1.14516
		AW434274 UI-R-BJ0p-afw-c-09-0-UI.s1 UI-R-BJ0p Rattus norvegicus cDNA clone UI-R-BJ0p-afw-c-09-0-UI 3', mRNA sequence [AW434274]	A_44_P386281	0.00657813	down	1.17604	Rn.103875
		Rattus norvegicus similar to MHC class I protein (LOC309600), mRNA [XM_227986]	A_44_P450284	0.0442947	up	1.48923
		Rattus norvegicus chromosome 7, 14 clones, strain BN/SsNHsdMCW RNOR03304660, whole genome shotgun sequence [AABR03055518]	A_44_P117850	0.01627	down	1.23091
Sncaip	synuclein, alpha interacting protein"		A_43_P19626	0.0293878	down	1.19099	chr18:48222306-48222365
Gapdh	glyceraldehyde-3-phosphate dehydrogenase	Rattus norvegicus glyceraldehyde-3-phosphate dehydrogenase (Gapdh), mRNA [NM_017008]	A_44_P193181	0.0144351	down	1.26555	Rn.129558
Olr8	olfactory receptor 8	Rattus norvegicus olfactory receptor 8 (Olr8), mRNA [NM_001000113]	A_44_P146773	0.0101395	down	1.19779	Rn.142001
		AA891917 EST195720 Normalized rat kidney, Bento Soares Rattus sp. cDNA clone RKIAI58 3' end, mRNA sequence [AA891917]	A_44_P268134	0.0234796	down	1.3387	Rn.13838
LOC689212	similar to Cystatin S precursor (LM protein)	PREDICTED: Rattus norvegicus similar to Cystatin S precursor (LM protein) (LOC689212), mRNA [XM_001069983]	A_42_P699461	0.0137915	down	1.33535	Rn.144315
Clec14a	C-type lectin domain family 14, member a"		A_42_P820847	0.0261037	down	1.56014	chr6:78852211-78852152
Smad4	SMAD family member 4	Rattus norvegicus Smad4 protein (Smad4) mRNA, complete cds [AF056002]	A_44_P228715	0.0263718	up	1.30198	Rn.9774
Inhbb	inhibin beta-B	PREDICTED: Rattus norvegicus inhibin beta-B (Inhbb), mRNA [XM_344130]	A_44_P576822	0.0260018	up	1.57913	Rn.35074
Olr476	olfactory receptor 476	Rattus norvegicus olfactory receptor 476 (Olr476), mRNA [NM_001000303]	A_44_P465998	0.00352692	down	1.26001	Rn.142961
Rnf213	ring finger protein 213	Rattus norvegicus similar to chromosome 17 open reading frame 27 (LOC303735), mRNA [XM_221191]	A_44_P494949	0.0175005	down	1.28463	Rn.198343
		AMGNNUC:NRDG1-00059-B1-A nrdg1 (10855) Rattus norvegicus cDNA clone nrdg1-00059-b1 5', mRNA sequence [CB545813]	A_44_P539475	0.0181911	down	1.49025	Rn.148737
Ccl3	chemokine (C-C motif) ligand 3	Rattus norvegicus chemokine (C-C motif) ligand 3 (Ccl3), mRNA [NM_013025]	A_42_P714311	0.0482648	up	1.98149	Rn.10139
			A_44_P793469	0.0175925	up	1.5109
		Rattus norvegicus similar to Carboxypeptidase H precursor (CPH) (Carboxypeptidase E) (CPE) (Enkephalin convertase) (Prohormone processing carboxypeptidase) (LOC306399), mRNA [XM_224778]	A_44_P473322	0.0155955	down	1.23998
Pick1	protein interacting with PRKCA 1	Rattus norvegicus protein interacting with PRKCA 1 (Pick1), mRNA [NM_053460]	A_42_P601217	0.04302	down	1.17809	Rn.24750
RGD1359380	similar to hypothetical protein MGC7537	Rattus norvegicus similar to hypothetical protein MGC7537 (RGD1359380), mRNA [NM_001007676]	A_44_P424658	0.0204853	up	1.27077	Rn.7420
Hspa8	heat shock protein 8	Rattus norvegicus heat shock protein 8 (Hspa8), mRNA [NM_024351]	A_44_P424367	0.0190876	up	1.65459	Rn.201298
Gdf10	growth differentiation factor 10	Rattus norvegicus growth differentiation factor 10 (Gdf10), mRNA [NM_024375]	A_42_P584734	0.0190882	up	1.65623	Rn.8707
			A_44_P630635	0.0270914	down	1.20446
Mrpl3	mitochondrial ribosomal protein L3	Rattus norvegicus mitochondrial ribosomal protein L3 (Mrpl3), nuclear gene encoding mitochondrial protein, mRNA [NM_001106852]	A_44_P339862	0.0216768	up	1.32517	Rn.6950
		AGENCOURT_26758174 NIH_MGC_255 Rattus norvegicus cDNA clone IMAGE:7318186 5', mRNA sequence [CO396428]	A_44_P270157	0.00916569	up	1.15816	Rn.164219
		AA943056 EST198555 Normalized rat brain, Bento Soares Rattus sp. cDNA clone RBRAE33 3' end, mRNA sequence [AA943056]	A_44_P251731	0.00594827	down	1.18661	Rn.203363
			A_42_P719131	0.0102081	up	1.18904
		AGENCOURT_28453164 NIH_MGC_247 Rattus norvegicus cDNA clone IMAGE:7322747 5', mRNA sequence [CO554673]	A_44_P700958	0.042439	down	1.14987	Rn.13004
		Gamma-aminobutyric acid type B receptor subunit 1 precursor (GABA-B receptor 1) (GABA-B-R1) (Gb1). [Source:UniProtKB/Swiss-Prot;Acc:Q9Z0U4] [ENSRNOT00000001004]	A_44_P313708	0.0432711	down	1.2025	Rn.30059
		UI-R-A0-au-g-03-0-UI.s1 UI-R-A0 Rattus norvegicus cDNA clone UI-R-A0-au-g-03-0-UI 3' similar to emb [AA818425]	A_44_P345194	0.0165246	down	1.14978	Rn.16704
Prpsap1	phosphoribosyl pyrophosphate synthetase-associated protein 1	Rattus norvegicus phosphoribosyl pyrophosphate synthetase-associated protein 1 (Prpsap1), mRNA [NM_022545]	A_44_P623094	0.00298254	up	1.19152	Rn.2290
Ppargc1a	peroxisome proliferator-activated receptor gamma, coactivator 1 alpha"		A_44_P305482	0.00152934	down	1.11886	chr14:64365667-64365726
Gzf1	GDNF-inducible zinc finger protein 1	Rattus norvegicus GDNF-inducible zinc finger protein 1 (Gzf1), mRNA [NM_001107788]	A_43_P19366	0.0332713	down	1.18265	Rn.40179
		Rattus norvegicus memory related gene-6 (MRG-6) mRNA, partial sequence [U95152]	A_44_P405087	0.0252116	up	1.78142	Rn.214233
		Transient receptor potential cation channel subfamily M member 6 (Fragment). [Source:UniProtKB/TrEMBL;Acc:A7L641] [ENSRNOT00000017892]	A_44_P238756	0.0125924	down	1.39521	Rn.104760
		AA997400 UI-R-C0-hq-h-09-0-UI.s1 UI-R-C0 Rattus norvegicus cDNA clone UI-R-C0-hq-h-09-0-UI 3', mRNA sequence [AA997400]	A_44_P484301	0.00996897	down	1.27412	Rn.73117
Dhx35	DEAH (Asp-Glu-Ala-His) box polypeptide 35	Rattus norvegicus DEAH (Asp-Glu-Ala-His) box polypeptide 35 (Dhx35), mRNA [NM_001108601]	A_44_P274514	0.0395154	down	1.60299	Rn.118078
Sall3	sal-like 3 (Drosophila)	Rattus norvegicus sal-like 3 (Drosophila) (Sall3), mRNA [NM_001108892]	A_43_P22037	0.0472407	down	1.1943	Rn.219678
		RVL11689 Wackym-Soares normalized rat vestibular cDNA library Rattus norvegicus cDNA 5', mRNA sequence [DV720643]	A_44_P715197	0.0153755	up	1.1315	Rn.216566
Olr1602	olfactory receptor 1602	Rattus norvegicus olfactory receptor 1602 (Olr1602), mRNA [NM_001000909]	A_44_P449663	0.0253243	down	1.20589	Rn.142328
Trp53inp2	tumor protein p53 inducible nuclear protein 2	PREDICTED: Rattus norvegicus tumor protein p53 inducible nuclear protein 2 (Trp53inp2), mRNA [XM_001074013]	A_44_P125069	0.00906127	up	1.19839	Rn.86075
		AW523958 UI-R-BO0-aie-h-11-0-UI.s1 UI-R-BO0 Rattus norvegicus cDNA clone UI-R-BO0-aie-h-11-0-UI 3', mRNA sequence [AW523958]	A_44_P357377	0.0424069	up	1.56772	Rn.29946
RGD1564778	similar to RIKEN cDNA 4121402D02	Rattus norvegicus similar to RIKEN cDNA 4121402D02 (RGD1564778), mRNA [NM_001107048]	A_44_P101023	0.0498498	up	1.40867	Rn.22437
			A_44_P640109	0.00989679	up	1.07327
RGD1310827	similar to RIKEN cDNA 1200009O22; EST AI316813	Rattus norvegicus similar to RIKEN cDNA 1200009O22; EST AI316813 (RGD1310827), mRNA [NM_001034010]	A_44_P286236	0.0162766	up	1.35119	Rn.25045
Pdgfrl	platelet-derived growth factor receptor-like	Rattus norvegicus platelet-derived growth factor receptor-like (Pdgfrl), mRNA [NM_001011921]	A_44_P299835	0.012574	down	2.48775	Rn.217523
		BE101788 UI-R-BT1-aqh-d-05-0-UI.s1 UI-R-BT1 Rattus norvegicus cDNA clone UI-R-BT1-aqh-d-05-0-UI 3', mRNA sequence [BE101788]	A_44_P312401	0.0305647	down	1.15003	Rn.44014
Hhipl1	HHIP-like 1	PREDICTED: Rattus norvegicus similar to KIAA1822 protein (predicted) (RGD1311698_predicted), mRNA [XM_343107]	A_42_P479348	0.00785135	down	1.13173	Rn.13263
		UI-R-FJ0-cpz-d-08-0-UI.s1 UI-R-FJ0 Rattus norvegicus cDNA clone UI-R-FJ0-cpz-d-08-0-UI 3', mRNA sequence [CA505867]	A_44_P952758	0.00223042	down	1.14273	Rn.219613
LOC682102	hypothetical protein LOC682102	Rattus norvegicus hypothetical protein LOC682102 (LOC682102), mRNA [NM_001134732]	A_44_P918404	0.0282647	up	1.22035	Rn.216802
Cfh	complement factor H	Rattus norvegicus complement factor H (Cfh), mRNA [NM_130409]	A_44_P160877	0.0484555	up	1.44806	Rn.101777
Lsm8	LSM8 homolog, U6 small nuclear RNA associated (S. cerevisiae)"		A_44_P303301	0.00396761	down	1.28333	chr4:44717202-44717261
RGD1564781	similar to Alpha enolase (2-phospho-D-glycerate hydro-lyase)	PREDICTED: Rattus norvegicus similar to Alpha enolase (2-phospho-D-glycerate hydro-lyase) (predicted) (RGD1564781_predicted), mRNA [XR_008189]	A_44_P398462	0.0339014	up	1.45881	Rn.195605
		AA901241 UI-R-A1-dw-e-08-0-UI.s1 UI-R-A1 Rattus norvegicus cDNA clone UI-R-A1-dw-e-08-0-UI 3' similar to gi [AA901241]	A_44_P207346	0.00947581	down	1.53657	Rn.199181
		PREDICTED: Rattus norvegicus hypothetical LOC290453 (LOC290453), mRNA [XR_007256]	A_44_P379903	0.00751737	up	1.17681	Rn.197095
			A_44_P871298	0.0486412	down	1.1502
			A_44_P375234	0.0302036	up	1.31877
		PREDICTED: Rattus norvegicus similar to ankyrin repeat domain 19 (LOC691515), mRNA [XM_001078612]	A_44_P421797	0.0134861	down	1.29348	Rn.104888
		S79979 ribosomal protein L37 {Homo sapiens} (exp=-1; wgp=0; cg=0), partial (85%) [TC610262]	A_44_P440756	0.0156807	down	1.10698
		AA901222 UI-R-A1-dp-g-01-0-UI.s1 UI-R-A1 Rattus norvegicus cDNA clone UI-R-A1-dp-g-01-0-UI 3' similar to gi [AA901222]	A_44_P394910	0.00805956	down	1.39063	Rn.101949
Agxt	alanine-glyoxylate aminotransferase	Rattus norvegicus alanine-glyoxylate aminotransferase (Agxt), mRNA [NM_030656]	A_44_P435381	0.0195389	down	1.15048	Rn.9931
Dnajb9	DnaJ (Hsp40) homolog, subfamily B, member 9"		A_44_P264777	0.0349438	up	1.27376	chr6:63584348-63584289
		RNU14522 Rattus norvegicus clone NOS1 CA satellite [U14522]	A_44_P143387	0.0255096	down	1.20437
Ostn	osteocrin	Osteocrin precursor (Musclin). [Source:UniProtKB/Swiss-Prot;Acc:P61365] [ENSRNOT00000049841]	A_44_P219712	0.0119775	up	1.96074	Rn.29193
AA926063	AA926063gene	Rattus norvegicus AA926063gene (AA926063), non-coding RNA [NR_002156]	A_44_P128110	0.0240467	up	1.18184
			A_44_P384927	0.0176078	down	1.42133
Cog4	component of oligomeric golgi complex 4	Rattus norvegicus component of oligomeric golgi complex 4 (Cog4), mRNA [NM_001108449]	A_43_P17974	0.0141704	up	1.23141	Rn.107745
			A_44_P210836	0.0165702	up	1.5291
Fn3k	fructosamine 3 kinase	UI-R-BJ1-avq-d-11-0-UI.s1 UI-R-BJ1 Rattus norvegicus cDNA clone UI-R-BJ1-avq-d-11-0-UI 3', mRNA sequence [BE109637]	A_44_P531137	0.0347674	up	1.23646	Rn.203106
		Rattus norvegicus similar to hypothetical gene supported by AF226663 (LOC288501), mRNA [XM_213721]	A_44_P198910	0.0118024	up	1.11576
		BQ200095 UI-R-EB1-clf-c-11-0-UI.s1 UI-R-EB1 Rattus norvegicus cDNA clone UI-R-EB1-clf-c-11-0-UI 3', mRNA sequence [BQ200095]	A_44_P197581	0.034438	down	1.0626
		Rattus norvegicus Aa2-041 mRNA, complete cds. [AY325172]	A_44_P278562	0.0172272	up	1.1372	Rn.202401
		RVL15663 Wackym-Soares normalized rat vestibular cDNA library Rattus norvegicus cDNA 5', mRNA sequence [DV723748]	A_42_P688802	0.00204882	up	1.38349	Rn.167054
		UI-R-CN1-cjo-h-17-0-UI.s1 UI-R-CN1 Rattus norvegicus cDNA clone UI-R-CN1-cjo-h-17-0-UI 3', mRNA sequence [BM390059]	A_44_P226382	0.0292413	down	1.07724	Rn.172123
		Shultzomica04345 Rat lung airway and parenchyma cDNA libraries Rattus norvegicus cDNA clone Contig3855 5', mRNA sequence [CF111094]	A_44_P994500	0.00268473	down	1.34823	Rn.199467
Rif1	RAP1 interacting factor homolog (yeast)	Rattus norvegicus similar to CG6004-PB (LOC295602), mRNA [XM_215736]	A_44_P368116	0.0281994	down	1.09283	Rn.20916
Hyou1	hypoxia up-regulated 1	Rattus norvegicus hypoxia up-regulated 1 (Hyou1), transcript variant 1, mRNA [NM_138867]	A_44_P242895	0.00265328	down	1.48845	Rn.10542
			A_44_P933805	0.0427589	down	1.12221
Rasgef1a	RasGEF domain family, member 1A"		A_44_P354208	0.00820882	down	1.12971	chr4:154386703-154386762
		AI411527 EST239821 Normalized rat kidney, Bento Soares Rattus sp. cDNA clone RKIEK49 3' end, mRNA sequence [AI411527]	A_44_P200475	0.01872	down	1.3784	Rn.14640
RGD1563100	similar to KIAA0089	PREDICTED: Rattus norvegicus similar to KIAA0089 (predicted) (RGD1563100_predicted), mRNA [XM_001069698]	A_44_P548758	0.0298435	down	1.31046
		UI-R-A1-du-f-03-0-UI.s1 UI-R-A1 Rattus norvegicus cDNA clone UI-R-A1-du-f-03-0-UI 3', mRNA sequence [AA924070]	A_44_P499665	0.022174	up	1.61923	Rn.153535
		Q9NQW1_HUMAN (Q9NQW1) Secretory pathway component Sec31B-1 (SEC31-like 2) (S. cerevisiae), partial (10%) [TC640115]	A_44_P168457	0.0247164	up	1.44587
Spred1	sprouty-related, EVH1 domain containing 1"		A_43_P19632	0.0235238	up	1.88235	chr3:103243556-103243615
		AMGNNUC:URRG1-00060-H3-A urrg1 (14046) Rattus norvegicus cDNA clone urrg1-00060-h3 5', mRNA sequence [CB547741]	A_44_P307356	0.0426967	down	1.36948	Rn.105193
		BQ195089 UI-R-CN1-cmd-f-03-0-UI.s1 UI-R-CN1 Rattus norvegicus cDNA clone UI-R-CN1-cmd-f-03-0-UI 3', mRNA sequence [BQ195089]	A_44_P484414	0.0356836	up	1.07097	Rn.15873
Trmt12	tRNA methyltransferase 12 homolog (S. cerevisiae)	Rattus norvegicus tRNA methyltransferase 12 homolog (S. cerevisiae) (Trmt12), mRNA [NM_001122976]	A_44_P382525	0.00502873	up	1.25223	Rn.105294
LOC286987	hemiferrin, transferrin-like protein"		A_43_P16262	0.0489111	down	1.09183
Tpm4	tropomyosin 4	Rattus norvegicus tropomyosin 4 (Tpm4), mRNA [NM_012678]	A_43_P11514	0.048224	up	1.25192	Rn.108199
LOC314328	similar to chromosome 14 open reading frame 166B	Rattus norvegicus similar to chromosome 14 open reading frame 166B (LOC314328), mRNA [NM_001037783]	A_44_P157087	0.0439517	down	1.16647	Rn.110654
Olr1751	olfactory receptor 1751	Rattus norvegicus olfactory receptor 1751 (Olr1751), mRNA [NM_001000492]	A_44_P391118	0.0307233	down	1.07399	Rn.143697
Nsbp1	nucleosomal binding protein 1	Rattus norvegicus nucleosomal binding protein 1 (Nsbp1), mRNA [NM_001134706]	A_42_P769969	0.0282527	up	1.10803	Rn.25395
Slc22a4	solute carrier family 22 (organic cation transporter), member 4"		A_42_P707727	0.0365255	down	1.08281
LOC689820	similar to SET domain-containing protein	PREDICTED: Rattus norvegicus similar to SET domain-containing protein (LOC689820), mRNA [XM_001072149]	A_42_P726994	0.0198206	up	1.20739	Rn.8879
		AA818947 UI-R-A0-as-d-12-0-UI.s1 UI-R-A0 Rattus norvegicus cDNA clone UI-R-A0-as-d-12-0-UI 3' similar to gi [AA818947]	A_44_P549487	0.0495715	down	1.50494	Rn.16408
		BF285140 EST449731 Rat Gene Index, normalized rat, Rattus norvegicus cDNA Rattus norvegicus cDNA clone RGIFA94, mRNA sequence [BF285140]	A_44_P726979	0.0479632	down	1.2116	Rn.137652
		BG665613 DRACFE03 Rat DRG Library Rattus norvegicus cDNA clone DRACFE03 5', mRNA sequence [BG665613]	A_44_P136388	0.00836436	up	1.39088	Rn.166492
Mrc1	mannose receptor, C type 1"		A_44_P635138	0.0357726	up	1.3973	chr17:88492403-88492462
			A_44_P929894	0.037469	down	1.69749
		CB547206 AMGNNUC:SRPB2-00182-C10-A srpb2 (10220) Rattus norvegicus cDNA clone srpb2-00182-c10 5', mRNA sequence [CB547206]	A_44_P204562	0.0460244	up	1.07499	Rn.202886
MGC114427	similar to melanoma antigen family A, 5"		A_43_P20443	0.0428923	down	1.34444	chrX:149964231-149964290
		AI145997 UI-R-BT0-pz-b-10-0-UI.s1 UI-R-BT0 Rattus norvegicus cDNA clone UI-R-BT0-pz-b-10-0-UI 3', mRNA sequence [AI145997]	A_44_P542274	0.0116649	down	1.21296	Rn.67042
Psbpc2	prostatic steroid-binding protein C2	Rattus norvegicus prostatic steroid-binding protein C2 (Psbpc2), mRNA [NM_207593]	A_43_P15656	0.0497517	down	1.64491	Rn.10394
		BG673065 DRNBIE11 Rat DRG Library Rattus norvegicus cDNA clone DRNBIE11 5', mRNA sequence [BG673065]	A_44_P439597	0.0231903	up	1.51918	Rn.14919
Gzmb	granzyme B	R.norvegicus mRNA for granzyme-like protein III. [X76996]	A_43_P16029	0.0492931	up	2.91254	Rn.132115
Dio1	deiodinase, iodothyronine, type I"		A_42_P470649	0.0217617	down	1.14804	chr5:128385972-128385913
Znf592	zinc finger protein 592	Rattus norvegicus zinc finger protein 592 (Znf592), mRNA [NM_001106272]	A_44_P198965	0.0490427	up	1.13567	Rn.22944
		Rattus norvegicus similar to putative ionotropic glutamate receptor GLURR-F11694B (LOC317015), mRNA [XM_229646]	A_44_P175837	0.00649135	up	1.37267
Meis2	Meis1, myeloid ecotropic viral integration site 1 homolog 2"		A_44_P333116	0.0228943	up	1.20997	chr3:101916881-101916822
		RVL2997 Wackym-Soares normalized rat vestibular cDNA library Rattus norvegicus cDNA 5', mRNA sequence [DV718357]	A_44_P808337	0.0310373	up	1.2775	Rn.164171
		Q7TQ12_RAT (Q7TQ12) Aa1114, partial (9%) [TC603481]	A_44_P683538	0.0296556	up	1.18128
		AW142606 EST292858 Normalized rat embryo, Bento Soares Rattus sp. cDNA clone RGIAQ53 5' end, mRNA sequence [AW142606]	A_44_P573915	0.0259251	up	1.28072	Rn.47597
Ptpn3	protein tyrosine phosphatase, non-receptor type 3"		A_44_P726568	0.0381658	down	1.29097	chr5:75107514-75107455
Soat2	sterol O-acyltransferase 2	Rattus norvegicus sterol O-acyltransferase 2 (Soat2), mRNA [NM_153728]	A_44_P116346	0.0182296	up	1.0608	Rn.83628
		Q6P6I4_MOUSE (Q6P6I4) Glutathione S-transferase, theta 3, complete [TC589435]	A_44_P852862	0.0316899	up	1.59207
Atp6ap1	ATPase, H+ transporting, lysosomal accessory protein 1"		A_43_P12679	0.0122413	up	1.18393	chrX:160306506-160306448
			A_44_P947462	0.0351594	up	1.44311
Ap1s2	adaptor-related protein complex 1, sigma 2 subunit"		A_44_P480696	0.0322751	up	1.05775	chrX:51347874-51347815
			A_44_P137839	0.0360036	up	1.58574
C1qtnf3	C1q and tumor necrosis factor related protein 3	Rattus norvegicus C1q and tumor necrosis factor related protein 3 (C1qtnf3), mRNA [NM_001134436]	A_44_P835847	0.0252622	up	2.04609	Rn.16507
Olr32	olfactory receptor 32	Rattus norvegicus olfactory receptor 32 (Olr32), mRNA [NM_001000690]	A_44_P479985	0.0342174	down	1.46665	Rn.141941
Krt84	keratin 84	Rattus norvegicus keratin 84 (Krt84), mRNA [NM_001008812]	A_44_P370817	0.0279531	up	1.11101	Rn.143278
		AI170501 EST216429 Normalized rat lung, Bento Soares Rattus sp. cDNA clone RLUCO50 3' end, mRNA sequence [AI170501]	A_44_P226208	0.0012241	down	1.46913	Rn.202993
			A_44_P885692	0.0381023	up	1.02819
Mtmr4	myotubularin related protein 4	Rattus norvegicus myotubularin related protein 4 (Mtmr4), mRNA [NM_001105827]	A_44_P348111	0.0181089	down	1.1712	Rn.2567
		UI-R-FS1-cqk-e-14-0-UI.s1 UI-R-FS1 Rattus norvegicus cDNA clone UI-R-FS1-cqk-e-14-0-UI 3', mRNA sequence [CA507405]	A_44_P526478	0.0483856	up	1.10535	Rn.141084
			A_44_P192461	0.0429472	up	1.06694
			A_44_P806917	0.0185403	up	1.16452
			A_44_P197006	0.0421248	down	1.62729
Dusp13	dual specificity phosphatase 13	Rattus norvegicus dual specificity phosphatase 13 (Dusp13), mRNA [NM_001007006]	A_44_P1023637	0.0151339	up	1.24259	Rn.137327
		AI103105 EST212394 Normalized rat embryo, Bento Soares Rattus sp. cDNA clone REMBX32 3' end, mRNA sequence [AI103105]	A_44_P117955	0.00239314	down	1.14371	Rn.203151
		BQ190539 UI-R-DQ1-ckv-c-02-0-UI.s1 UI-R-DQ1 Rattus norvegicus cDNA clone UI-R-DQ1-ckv-c-02-0-UI 3', mRNA sequence [BQ190539]	A_44_P187874	0.0424964	down	1.09292	Rn.87066
Ncr3	natural cytotoxicity triggering receptor 3	Rattus norvegicus natural cytotoxicity triggering receptor 3 (Ncr3), mRNA [NM_181822]	A_44_P287847	0.0454486	down	1.09497	Rn.203206
Prx	periaxin	Rattus norvegicus periaxin (Prx), mRNA [NM_023976]	A_42_P553918	0.0455804	up	1.10805	Rn.10395
		AA997113 UI-R-C0-hr-d-10-0-UI.s1 UI-R-C0 Rattus norvegicus cDNA clone UI-R-C0-hr-d-10-0-UI 3', mRNA sequence [AA997113]	A_44_P413534	0.0351693	down	1.11832	Rn.1536
		Q8VHU4_RAT (Q8VHU4) IKAP, complete [TC586083]	A_44_P652564	0.0354523	up	1.15933
		BC034173 aldolase 2, B isoform {Mus musculus} (exp=-1; wgp=0; cg=0), partial (18%) [TC646809]	A_44_P858381	0.0152534	down	1.09808
Akap12	A kinase (PRKA) anchor protein 12	Rattus norvegicus A kinase (PRKA) anchor protein 12 (Akap12), transcript variant 1, mRNA [NM_057103]	A_44_P198535	0.00470914	down	1.16253	Rn.122094
		UI-R-CA0-bgs-c-07-0-UI.s1 UI-R-CA0 Rattus norvegicus cDNA clone UI-R-CA0-bgs-c-07-0-UI 3', mRNA sequence [BF401317]	A_44_P644637	0.0431086	down	1.4987	Rn.208735
Fam151b	family with sequence similarity 151, member B"		A_44_P287241	0.021715	up	1.06706	chr2:22702670-22701783
Vcam1	vascular cell adhesion molecule 1	Rattus norvegicus vascular cell adhesion molecule 1 (Vcam1), mRNA [NM_012889]	A_42_P499158	0.014673	up	2.64011	Rn.11267
Crym	crystallin, mu	Rattus norvegicus crystallin, mu (Crym), mRNA [NM_053955]	A_43_P12996	0.00200805	down	1.31108	Rn.24561
Dennd4b	DENN/MADD domain containing 4B	PREDICTED: Rattus norvegicus similar to brain specific protein 4 (predicted) (RGD1560320_predicted), mRNA [XM_342287]	A_43_P18233	0.0131306	down	1.15987	Rn.22411
		MAP2=HMW-MAP2 {alternatively spliced} [rats, brain, mRNA Partial, 267 nt]. [S81002]	A_44_P377164	0.0475024	down	1.14528
Hspa12a	heat shock 70kDa protein 12A	Rattus norvegicus heat shock 70kDa protein 12A (Hspa12a), mRNA [NM_001107445]	A_43_P20751	0.00159353	down	1.24734	Rn.18598
			A_44_P351747	0.044517	down	1.4073
Lef1	lymphoid enhancer binding factor 1	Rattus norvegicus lymphoid enhancer binding factor 1 (Lef1), mRNA [NM_130429]	A_44_P240702	0.0266529	down	1.46154	Rn.21926
Dock8	dedicator of cytokinesis 8	Rattus norvegicus dedicator of cytokinesis 8 (Dock8), mRNA [NM_001037793]	A_44_P872195	0.0355458	up	1.23416	Rn.164225
		Q8X792_ECO57 (Q8X792) No significant matches, partial (7%) [TC637440]	A_44_P580120	0.0404097	down	1.24595
		Rattus norvegicus chromosome 8, 32 clones, strain BN/SsNHsdMCW RNOR03312996, whole genome shotgun sequence [AABR03063000]	A_44_P455715	0.00474719	down	1.45591	Rn.207938
		AA956967 UI-R-E1-fl-h-07-0-UI.s1 UI-R-E1 Rattus norvegicus cDNA clone UI-R-E1-fl-h-07-0-UI 3', mRNA sequence [AA956967]	A_44_P142541	0.0357423	down	1.0889	Rn.163351
		AA859292 UI-R-E0-cj-a-05-0-UI.s1 UI-R-E0 Rattus norvegicus cDNA clone UI-R-E0-cj-a-05-0-UI 3' similar to emb [AA859292]	A_44_P301040	0.0239571	down	1.04944	Rn.29745
Cdkn2aipnl	CDKN2A interacting protein N-terminal like	Rattus norvegicus CDKN2A interacting protein N-terminal like (Cdkn2aipnl), mRNA [NM_001008278]	A_44_P492594	0.028199	up	1.20002	Rn.39094
			A_44_P597503	0.017661	up	1.19284
		BF566488 UI-R-BT1-akg-h-07-0-UI.r1 UI-R-BT1 Rattus norvegicus cDNA clone UI-R-BT1-akg-h-07-0-UI 5', mRNA sequence [BF566488]	A_44_P665677	0.0227054	up	1.24355	Rn.18130
			A_44_P730817	0.0462169	down	1.47031
Mybpc3	myosin binding protein C, cardiac"		A_42_P576549	0.0354529	down	1.12322	chr3:75495320-75495379
Fn1	fibronectin 1	Rattus norvegicus fibronectin 1 (Fn1), mRNA [NM_019143]	A_44_P681660	0.00593629	up	1.38634	Rn.1604
			A_44_P313898	0.0204867	down	1.37634
Ptger3	prostaglandin E receptor 3 (subtype EP3)	Rattus norvegicus prostaglandin E receptor 3 (subtype EP3) (Ptger3), mRNA [NM_012704]	A_44_P276317	0.00740525	up	1.67728	Rn.10361
Tp53	tumor protein p53	Rattus norvegicus tumor protein p53 (Tp53), mRNA [NM_030989]	A_44_P150594	0.0164262	up	1.15154	Rn.54443
		AI232145 EST228833 Normalized rat kidney, Bento Soares Rattus sp. cDNA clone RKIBX44 3' end, mRNA sequence [AI232145]	A_44_P183260	0.0450537	down	1.14509	Rn.2550
Palb2	partner and localizer of BRCA2	PREDICTED: Rattus norvegicus similar to hypothetical protein FLJ21816 (predicted) (RGD1304759_predicted), mRNA [XM_215047]	A_44_P1021489	0.0154034	up	1.33658	Rn.43638
Ano4	anoctamin 4	Rattus norvegicus anoctamin 4 (Ano4), mRNA [NM_001106778]	A_44_P225223	0.0151554	down	1.09365	Rn.23908
Pkp4	plakophilin 4	Rattus norvegicus plakophilin 4 (Pkp4), mRNA [NM_001106482]	A_44_P520535	0.0164174	up	1.08564	Rn.17389
		AA945624 EST201123 Normalized rat liver, Bento Soares Rattus sp. cDNA clone RLIAP94 3' end, mRNA sequence [AA945624]	A_44_P348582	0.0398226	down	1.13813	Rn.7882
Tgfbr1	transforming growth factor, beta receptor 1"		A_44_P640828	0.00889457	up	1.18371	chr5:64032274-64032333
		BE115614 UI-R-BJ1-avw-h-12-0-UI.s1 UI-R-BJ1 Rattus norvegicus cDNA clone UI-R-BJ1-avw-h-12-0-UI 3', mRNA sequence [BE115614]	A_44_P185673	0.048199	down	1.7712	Rn.80611
		AA924533 UI-R-A1-dz-e-03-0-UI.s1 UI-R-A1 Rattus norvegicus cDNA clone UI-R-A1-dz-e-03-0-UI 3' similar to gi [AA924533]	A_44_P418024	0.0429222	up	1.20155	Rn.14073
Tnpo1	transportin 1	Rattus norvegicus similar to karyopherin beta 2; importin beta 2; transportin; M9 region interaction protein (LOC309126), mRNA [XM_219500]	A_44_P349356	0.0141406	up	1.21053	Rn.56083
Rexo2	REX2, RNA exonuclease 2 homolog (S. cerevisiae)"		A_42_P599210	0.00544078	up	1.30671	chr8:51754173-51752805
RGD1561185	similar to putative protein kinase		A_44_P805899	0.047153	down	1.9712	Rn.141151
		AA926239 UI-R-A1-eq-d-05-0-UI.s1 UI-R-A1 Rattus norvegicus cDNA clone UI-R-A1-eq-d-05-0-UI 3' similar to gi [AA926239]	A_44_P544386	0.0362408	up	1.18433	Rn.105786
			A_44_P933782	0.0493446	up	1.17549
RGD1565487	RGD1565487	PREDICTED: Rattus norvegicus RGD1565487 (predicted) (RGD1565487_predicted), mRNA [XM_238082]	A_44_P475617	0.0348387	down	1.18529	Rn.153598
Dusp14	dual specificity phosphatase 14	Rattus norvegicus dual specificity phosphatase 14 (Dusp14), mRNA [NM_001079893]	A_44_P119658	0.00929981	up	1.63943	Rn.25406
		PREDICTED: Rattus norvegicus similar to hypothetical protein (predicted) (RGD1562784_predicted), mRNA [XM_219560]	A_44_P318794	0.0369575	up	1.72579	Rn.209637
		BF388757 UI-R-BS2-bde-b-12-0-UI.s1 UI-R-BS2 Rattus norvegicus cDNA clone UI-R-BS2-bde-b-12-0-UI 3', mRNA sequence [BF388757]	A_44_P479681	0.0367766	up	1.09414	Rn.220021
		DRN03A01 Rat DRG Library Rattus norvegicus cDNA clone DRN03A01 5', mRNA sequence [BG668902]	A_44_P409132	0.0231461	down	1.30825	Rn.112639
		BE102993 UI-R-BT1-aqr-a-04-0-UI.s1 UI-R-BT1 Rattus norvegicus cDNA clone UI-R-BT1-aqr-a-04-0-UI 3', mRNA sequence [BE102993]	A_44_P376741	0.0343454	down	1.73859	Rn.64585
		Q8WV73_HUMAN (Q8WV73) REEP3 protein, partial (42%) [TC602650]	A_44_P946130	0.0397488	down	1.09279
Ppcs	phosphopantothenoylcysteine synthetase	Rattus norvegicus phosphopantothenoylcysteine synthetase (Ppcs), mRNA [NM_001039010]	A_42_P511615	0.0368131	up	1.28888	Rn.15017
Axl	Axl receptor tyrosine kinase	Rattus norvegicus Axl receptor tyrosine kinase (Axl), transcript variant 2, mRNA [NM_001013147]	A_44_P353729	0.047448	down	1.16805	Rn.161805
		UI-R-E0-co-b-06-0-UI.r1 UI-R-E0 Rattus norvegicus cDNA clone UI-R-E0-co-b-06-0-UI 5', mRNA sequence [BF555101]	A_44_P654702	0.0189524	up	1.30524	Rn.211828
		BM986233 EST531687 Rat gene index, normalized rat, norvegicus Rattus norvegicus cDNA clone RGIAB50 3' end similar to 57-KDa calcium-binding protein MCaBP, mRNA sequence [BM986233]	A_44_P179622	0.0425058	down	1.58671	Rn.974
		AA819652 UI-R-A0-an-g-08-0-UI.s1 UI-R-A0 Rattus norvegicus cDNA clone UI-R-A0-an-g-08-0-UI 3' similar to gb [AA819652]	A_44_P333526	0.00398775	down	1.20462
RT1-A2	RT1 class Ia, locus A2"		A_44_P296155	0.0131635	up	1.992	chr20:5024199-5024258
Vom2r47	vomeronasal 2 receptor, 47"		A_44_P393482	0.00631155	down	1.13886	chr2:154484210-154484151
		AF043642 matrin cyclophilin {Rattus norvegicus} (exp=-1; wgp=0; cg=0), partial (7%) [TC609106]	A_44_P731679	0.0177769	down	1.09524
		Rattus norvegicus similar to hypothetical protein FLJ20276 (LOC313330), mRNA [XM_233127]	A_44_P255756	0.02872	down	1.1303
			A_44_P899198	0.0327661	up	1.21658
Fzd7	frizzled homolog 7 (Drosophila)	PREDICTED: Rattus norvegicus frizzled homolog 7 (Drosophila) (predicted) (Fzd7_predicted), mRNA [XM_237191]	A_44_P171337	0.01276	down	1.20791	Rn.1806
		BM392313 UI-R-DO1-ckp-f-14-0-UI.s1 UI-R-DO1 Rattus norvegicus cDNA clone UI-R-DO1-ckp-f-14-0-UI 3', mRNA sequence [BM392313]	A_44_P406248	0.034549	up	1.01409	Rn.64535
		HEY1_CANFA (Q9TSZ2) Hairy/enhancer-of-split related with YRPW motif 1 (Hairy and enhancer of split related 1) (HESR-1), partial (40%) [TC590529]	A_44_P563985	0.0475443	down	1.16523
Nr4a3	nuclear receptor subfamily 4, group A, member 3"		A_43_P11932	0.0366828	up	2.0979	chr5:64727357-64727416
		AA957596 UI-R-E1-gb-b-05-0-UI.s1 UI-R-E1 Rattus norvegicus cDNA clone UI-R-E1-gb-b-05-0-UI 3', mRNA sequence [AA957596]	A_44_P556864	0.0125009	down	1.11037	Rn.9330
Grid1	glutamate receptor, ionotropic, delta 1"		A_44_P362958	0.0436672	down	1.08612	chr16:11201457-11201516
Myo1a	myosin IA	PREDICTED: Rattus norvegicus myosin IA (Myo1a), mRNA [XM_238479]	A_43_P15808	0.0101246	down	1.04429	Rn.96429
			A_44_P791860	0.0175938	up	2.16038
		BF398399 UI-R-BS2-beo-d-06-0-UI.s1 UI-R-BS2 Rattus norvegicus cDNA clone UI-R-BS2-beo-d-06-0-UI 3', mRNA sequence [BF398399]	A_44_P239331	0.00678542	up	1.17531	Rn.2374
		GPTC2_MOUSE (Q7TQC7) G patch domain-containing protein 2, partial (33%) [TC625167]	A_44_P977479	0.025075	up	1.26221
		RVL14479 Wackym-Soares normalized rat vestibular cDNA library Rattus norvegicus cDNA 5', mRNA sequence [DV722815]	A_44_P333667	0.00252494	down	1.1497	Rn.45164
		BI300893 UI-R-CV2-cil-b-12-0-UI.s1 UI-R-CV2 Rattus norvegicus cDNA clone UI-R-CV2-cil-b-12-0-UI 3', mRNA sequence [BI300893]	A_44_P972174	0.0342697	down	1.26057	Rn.204773
Tmem106a	transmembrane protein 106A	Rattus norvegicus transmembrane protein 106A (Tmem106a), mRNA [NM_001024967]	A_44_P992056	0.0165108	up	1.99784	Rn.16484
Chchd5	coiled-coil-helix-coiled-coil-helix domain containing 5	Rattus norvegicus coiled-coil-helix-coiled-coil-helix domain containing 5, mRNA (cDNA clone MGC:187492 IMAGE:7384755), complete cds [BC158612]	A_44_P699356	0.0121172	up	1.13191	Rn.8658
LOC245710	PSD-95 binding protein	Rattus norvegicus mRNA for PSD-95 binding protein, partial cds [AB005146]	A_44_P158732	0.00968653	up	1.3959	Rn.214229
			A_44_P157024	0.040263	up	1.23673	Rn.201729
Grm6	glutamate receptor, metabotropic 6"		A_44_P363143	0.00166741	down	1.16835	chr10:36429676-36429735
Tmf1	TATA element modulatory factor 1	Rattus norvegicus TATA element modulatory factor 1 (Tmf1), mRNA [NM_053671]	A_44_P444247	0.0491107	down	1.09004	Rn.91637
			A_44_P915194	0.0395094	up	1.44172
Lin54	lin-54 homolog (C. elegans)	Rattus norvegicus lin-54 homolog (C. elegans) (Lin54), mRNA [NM_001100564]	A_44_P379815	0.0465061	up	1.38746	Rn.24111
LOC682704	similar to CG7220-PA, isoform A"		A_44_P714246	0.0438285	down	1.19539	chr5:1913086-1913027
			A_44_P248378	0.0125436	down	1.20872
		Mamdc2 protein (Fragment). [Source:UniProtKB/TrEMBL;Acc:Q68FP0] [ENSRNOT00000034216]	A_44_P357420	0.0357076	down	1.60818	Rn.23790
Prss2	protease, serine, 2"		A_44_P554904	0.000232379	up	1.09694	chr4:69090844-69090903
			A_44_P732751	0.048548	up	1.25588
Usp11	ubiquitin specific peptidase 11	Rattus norvegicus ubiquitin specific peptidase 11 (Usp11), mRNA [NM_001008861]	A_44_P261266	0.0324218	up	1.21873	Rn.2492
MGC112830	similar to transcription factor	Rattus norvegicus similar to transcription factor (MGC112830), mRNA [NM_001025718]	A_44_P249606	0.0242222	down	1.09151	Rn.13772
			A_44_P792124	0.0382277	down	1.62845
		Q7TQ12_RAT (Q7TQ12) Aa1114, partial (9%) [TC599738]	A_44_P714296	0.0282262	down	1.46087
		AA964058 UI-R-C0-gw-a-12-0-UI.s1 UI-R-C0 Rattus norvegicus cDNA clone UI-R-C0-gw-a-12-0-UI 3', mRNA sequence [AA964058]	A_44_P137040	0.047097	down	1.27883	Rn.65053
			A_44_P929254	0.00591255	down	1.2556
		BF414043 UI-R-BJ2-bol-g-02-0-UI.s1 UI-R-BJ2 Rattus norvegicus cDNA clone UI-R-BJ2-bol-g-02-0-UI 3', mRNA sequence [BF414043]	A_44_P273639	0.0404471	down	1.10089	Rn.17258
			A_44_P793731	0.00342812	up	1.05253
Cnga2	cyclic nucleotide gated channel alpha 2	Rattus norvegicus cyclic nucleotide gated channel alpha 2 (Cnga2), mRNA [NM_012928]	A_44_P426466	0.00889397	up	1.04503	Rn.10384
Ttc9	tetratricopeptide repeat domain 9	Rattus norvegicus tetratricopeptide repeat domain 9 (Ttc9), mRNA [NM_001134731]	A_44_P473622	0.000946924	down	1.28639	Rn.8149
Sdccag3	serologically defined colon cancer antigen 3	Rattus norvegicus serologically defined colon cancer antigen 3 (Sdccag3), mRNA [NM_001013135]	A_44_P131036	0.0201152	up	1.53913	Rn.110254
Amz2	archaelysin family metallopeptidase 2	Rattus norvegicus archaelysin family metallopeptidase 2 (Amz2), mRNA [NM_001014121]	A_43_P10136	0.001026	up	1.29106	Rn.15408
		BE112479 UI-R-BJ1-avi-b-08-0-UI.s1 UI-R-BJ1 Rattus norvegicus cDNA clone UI-R-BJ1-avi-b-08-0-UI 3', mRNA sequence [BE112479]	A_44_P526441	0.0103078	down	1.04657	Rn.168798
		R.norvegicus mRNA for immunoglobulin variable region (clone ERF1.5) [Z93354]	A_44_P452217	0.00366993	down	1.1487	Rn.179369
		CB546732 AMGNNUC:NRDG1-00185-A12-A nrdg1 (10855) Rattus norvegicus cDNA clone nrdg1-00185-a12 5', mRNA sequence [CB546732]	A_44_P253713	0.0305578	up	1.49487
Pccb	propionyl coenzyme A carboxylase, beta polypeptide"		A_44_P146703	0.0015177	up	1.04323	chr8:105948700-105948641
Ace	angiotensin I converting enzyme (peptidyl-dipeptidase A) 1	Rattus norvegicus angiotensin I converting enzyme (peptidyl-dipeptidase A) 1 (Ace), mRNA [NM_012544]	A_43_P11457	0.0391371	down	1.21289	Rn.10149
		AA818661 UI-R-A0-az-g-10-0-UI.s1 UI-R-A0 Rattus norvegicus cDNA clone UI-R-A0-az-g-10-0-UI 3' similar to gi [AA818661]	A_44_P940929	0.0213652	down	1.11839	Rn.116613
Fer1l6	fer-1-like 6 (C. elegans)	PREDICTED: Rattus norvegicus similar to mKIAA0493 protein (predicted) (RGD1564703_predicted), mRNA [XM_235335]	A_44_P215808	0.0402857	down	1.24894
		AW523762 UI-R-BO0-aih-g-10-0-UI.s1 UI-R-BO0 Rattus norvegicus cDNA clone UI-R-BO0-aih-g-10-0-UI 3', mRNA sequence [AW523762]	A_44_P239727	0.0184057	down	1.18145	Rn.1105
Olr40	olfactory receptor 40	Rattus norvegicus olfactory receptor 40 (Olr40), mRNA [NM_001000127]	A_44_P440351	0.0237743	down	1.12194	Rn.141934
Trim39	tripartite motif-containing 39	Rattus norvegicus tripartite motif-containing 39 (Trim39), mRNA [NM_213562]	A_44_P245427	0.0253549	up	1.21638	Rn.211560
		BF290460 EST455051 Rat Gene Index, normalized rat, Rattus norvegicus cDNA Rattus norvegicus cDNA clone RGIHV87 5' sequence, mRNA sequence [BF290460]	A_44_P132184	0.0252914	up	1.16195	Rn.98492
Slc6a7	solute carrier family 6 (neurotransmitter transporter, L-proline), member 7"		A_42_P600978	0.00708405	up	1.17605	chr18:56959331-56959272
LOC685756	hypothetical protein LOC685756	Rattus norvegicus hypothetical protein LOC685756 (LOC685756), mRNA [NM_001109480]	A_44_P640313	0.0253921	up	1.30085	Rn.28477
Ephb2	Eph receptor B2	Rattus norvegicus Eph receptor B2 (Ephb2), mRNA [NM_001127319]	A_44_P480780	0.00301357	down	1.09234	Rn.27233
LOC302574	similar to interleukin enhancer binding factor 3	PREDICTED: Rattus norvegicus similar to interleukin enhancer binding factor 3 (LOC302574), mRNA [XR_005653]	A_44_P363301	0.0103243	down	1.81744	Rn.196897
			A_43_P10016	0.0411888	up	1.72264
Mlf1	myeloid leukemia factor 1	Rattus norvegicus myeloid leukemia factor 1 (Mlf1), mRNA [NM_001107680]	A_44_P424218	0.039706	down	2.47737	Rn.54860
Fasn	fatty acid synthase	Rattus norvegicus fatty acid synthase (Fasn), mRNA [NM_017332]	A_44_P235985	0.0411148	down	3.23624	Rn.9486
RGD1307235	similar to RIKEN cDNA 2310035C23	Rattus norvegicus similar to RIKEN cDNA 2310035C23 (LOC309053), mRNA [XM_219401]	A_44_P420927	0.0239373	down	1.06955	Rn.38292
Tor1b	torsin family 1, member B"		A_43_P18366	0.0216082	up	1.14447	chr3:10022777-10022836
Ass1	argininosuccinate synthetase 1	Rattus norvegicus argininosuccinate synthetase 1 (Ass1), mRNA [NM_013157]	A_44_P447373	0.0191688	up	1.38971	Rn.5078
			A_44_P515670	0.00442236	down	1.36456
Bcar3	breast cancer anti-estrogen resistance 3	Rattus norvegicus breast cancer anti-estrogen resistance 3 (Bcar3), mRNA [NM_001107722]	A_43_P18254	0.0293208	down	1.17647	Rn.7383
Fxn	frataxin	PREDICTED: Rattus norvegicus similar to frataxin (predicted) (RGD1565754_predicted), mRNA [XM_574642]	A_44_P533560	0.0216232	down	1.4438	Rn.13133
Gykl1	glycerol kinase-like 1	PREDICTED: Rattus norvegicus glucokinase activity, related sequence 1 (predicted) (Gk-rs1_predicted), mRNA [XM_001057654]	A_44_P429101	0.040742	down	1.18712
Nphp1	nephronophthisis 1 (juvenile) homolog (human)	Rattus norvegicus nephronophthisis 1 (juvenile) homolog (human) (Nphp1), mRNA [NM_001106506]	A_44_P407849	0.0134819	up	1.64551	Rn.32745
		BF560331 UI-R-E1-fu-h-09-0-UI.r1 UI-R-E1 Rattus norvegicus cDNA clone UI-R-E1-fu-h-09-0-UI 5', mRNA sequence [BF560331]	A_44_P392024	0.00140778	down	1.23088	Rn.91677
RT1-Cl	RT1 class Ib, locus Cl"		A_44_P554917	0.0443383	up	1.56163
		Q7TPJ2_RAT (Q7TPJ2) Ac2-224, partial (14%) [TC605833]	A_44_P823317	0.00409221	down	1.25543
Vps52	vacuolar protein sorting 52 homolog (S. cerevisiae)	Rattus norvegicus vacuolar protein sorting 52 homolog (S. cerevisiae) (Vps52), mRNA [NM_033097]	A_43_P12732	0.00986953	up	1.18566	Rn.51354
		AA859224 UI-R-E0-cd-b-09-0-UI.s1 UI-R-E0 Rattus norvegicus cDNA clone UI-R-E0-cd-b-09-0-UI 3' similar to dbj [AA859224]	A_44_P200274	0.0188723	down	1.16061	Rn.95104
		AI234939 EST231501 Normalized rat ovary, Bento Soares Rattus sp. cDNA clone ROVCJ83 3' end, mRNA sequence [AI234939]	A_44_P249753	0.00399271	down	1.11965	Rn.793
		Rattus norvegicus similar to Heterogeneous nuclear ribonucleoprotein A1 (Helix-destabilizing protein) (Single-strand binding protein) (hnRNP core protein A1) (HDP-1) (Topoisomerase-inhibitor suppressed) (LOC295611), mRNA [XM_229963]	A_44_P152085	0.0347961	down	1.28374
		Q6TXI9_RAT (Q6TXI9) LRRGT00010, partial (36%) [TC593938]	A_44_P960215	0.0276556	up	1.60863
Chd2	chromodomain helicase DNA binding protein 2	Rattus norvegicus chromodomain helicase DNA binding protein 2 (Chd2), mRNA [NM_001107523]	A_44_P282794	0.0425992	down	1.99778	Rn.1779
Itga10	integrin, alpha 10"		A_44_P215459	0.00197553	up	1.40916	chr2:191466895-191466954
Prl7a3	prolactin family 7, subfamily a, member 3"		A_43_P12241	0.035354	down	2.27686	chr17:43671230-43671289
Eps15	epidermal growth factor receptor pathway substrate 15	Rattus norvegicus epidermal growth factor receptor pathway substrate 15 (Eps15), mRNA [NM_001009424]	A_43_P19497	0.00227413	up	1.18483	Rn.162085
		AA819532 UI-R-A0-bf-f-03-0-UI.s1 UI-R-A0 Rattus norvegicus cDNA clone UI-R-A0-bf-f-03-0-UI 3' similar to gb [AA819532]	A_44_P353102	0.0461598	down	1.13814	Rn.16064
RGD1561357	similar to LIM domain only 3	LIM domain only protein 3 (Neuronal-specific transcription factor DAT1). [Source:UniProtKB/Swiss-Prot;Acc:Q99MB5] [ENSRNOT00000010623]	A_44_P189237	0.00592486	up	1.03583	Rn.127746
			A_44_P908874	0.0196504	up	1.22043
Pde5a	phosphodiesterase 5A, cGMP-specific"		A_43_P15466	0.035668	up	1.59365	chr2:219515832-219515891
			A_44_P117316	0.0273277	down	1.56768
Ambp	alpha-1-microglobulin/bikunin precursor	Rattus norvegicus alpha-1-microglobulin/bikunin precursor (Ambp), mRNA [NM_012901]	A_44_P454532	0.0148799	down	1.54593	Rn.18721
Dpep1	dipeptidase 1 (renal)	Dipeptidase 1 precursor (EC 3.4.13.19) (Microsomal dipeptidase) (Renal dipeptidase). [Source:UniProtKB/Swiss-Prot;Acc:P31430] [ENSRNOT00000021397]	A_42_P819194	0.00408415	up	1.51151	Rn.6051
C1qtnf6	C1q and tumor necrosis factor related protein 6	Rattus norvegicus C1q and tumor necrosis factor related protein 6 (C1qtnf6), mRNA [NM_001034932]	A_44_P975458	0.0475739	down	2.06185	Rn.17708
Gpr176	G protein-coupled receptor 176	Probable G-protein coupled receptor 176 (G-protein coupled receptor AGR9) (RBU-15). [Source:UniProtKB/Swiss-Prot;Acc:Q64017] [ENSRNOT00000007882]	A_44_P299479	0.0445583	down	1.23388	Rn.44656
		AI407429 EST235718 Normalized rat ovary, Bento Soares Rattus sp. cDNA clone ROVDQ22 3' end, mRNA sequence [AI407429]	A_44_P997578	0.013742	up	1.10354
			A_44_P673994	0.0426639	down	1.05367
Slc7a15	solute carrier family 7 (cationic amino acid transporter, y+ system), member 15"		A_44_P344981	0.0443353	down	1.13607	chr6:32099173-32099114
RT1-Cl	RT1 class Ib, locus Cl"		A_44_P554925	0.00400495	up	1.6418	chr20:003510230-003510181
Ghr	growth hormone receptor	Rattus norvegicus growth hormone receptor (Ghr), mRNA [NM_017094]	A_44_P360845	0.0378549	down	1.15591	Rn.2178
		RVL14408 Wackym-Soares normalized rat vestibular cDNA library Rattus norvegicus cDNA 5', mRNA sequence [DV722752]	A_44_P971455	0.00585973	down	1.10911	Rn.199067
Tigd3	tigger transposable element derived 3	Rattus norvegicus tigger transposable element derived 3 (Tigd3), mRNA [NM_001107573]	A_44_P480424	0.0324793	down	1.15208	Rn.49556
		AW530337 UI-R-BU0-amv-d-09-0-UI.s1 UI-R-BU0 Rattus norvegicus cDNA clone UI-R-BU0-amv-d-09-0-UI 3', mRNA sequence [AW530337]	A_44_P644196	0.0210043	down	1.25306	Rn.17134
Plcd3	phospholipase C, delta 3"		A_43_P21626	0.0114728	down	1.20604	chr10:92241304-92241245
		RVL15054 Wackym-Soares normalized rat vestibular cDNA library Rattus norvegicus cDNA 5', mRNA sequence [DV723298]	A_44_P930681	0.0257899	up	2.1361	Rn.216931
		UI-R-C0-ig-b-07-0-UI.s10 UI-R-C0 Rattus norvegicus cDNA clone UI-R-C0-ig-b-07-0-UI 3', mRNA sequence [CK840665]	A_44_P614105	0.00708316	down	1.24396	Rn.137704
Lrba	LPS-responsive vesicle trafficking, beach and anchor containing"		A_43_P18573	0.0499585	down	1.58956	chr2:178322101-178325114
		AGENCOURT_17890468 NIH_MGC_238 Rattus norvegicus cDNA clone IMAGE:7134625 5', mRNA sequence [CK603543]	A_44_P644180	0.00556852	down	1.08541	Rn.47023
		AA955481 UI-R-A1-ex-f-05-0-UI.s1 UI-R-A1 Rattus norvegicus cDNA clone UI-R-A1-ex-f-05-0-UI 3', mRNA sequence [AA955481]	A_44_P297999	0.0461263	down	1.71963
		BF284985 EST449576 Rat Gene Index, normalized rat, Rattus norvegicus cDNA Rattus norvegicus cDNA clone RGIEY35, mRNA sequence [BF284985]	A_43_P17093	0.030825	up	1.27006	Rn.12932
		AW920322 EST351626 Rat gene index, normalized rat, norvegicus, Bento Soares Rattus norvegicus cDNA clone RGIGU02 5' end, mRNA sequence [AW920322]	A_44_P364005	0.00478964	up	1.29101
Ndst4	N-deacetylase/N-sulfotransferase (heparan glucosaminyl) 4	PREDICTED: Rattus norvegicus N-deacetylase [XM_342336]	A_44_P210804	0.0198413	down	1.32778	Rn.162619
		AI144795 UI-R-BT0-pr-h-02-0-UI.s1 UI-R-BT0 Rattus norvegicus cDNA clone UI-R-BT0-pr-h-02-0-UI 3', mRNA sequence [AI144795]	A_44_P211607	0.0212777	up	1.6302	Rn.17029
Pik3c2b	phosphoinositide-3-kinase, class 2, beta polypeptide"		A_43_P18400	0.0441656	down	1.14027	chr13:46006869-46008264
Itga11	integrin, alpha 11"		A_44_P452811	0.0414541	down	1.21135	chr8:66930435-66930633
Sparc	secreted protein, acidic, cysteine-rich (osteonectin)"		A_44_P451357	0.0448698	down	2.16455	chr10:40811532-40811473
Epc2	enhancer of polycomb homolog 2 (Drosophila)	Rattus norvegicus enhancer of polycomb homolog 2 (Drosophila) (Epc2), mRNA [NM_001108581]	A_44_P229540	0.00620031	down	1.21273	Rn.23462
Neurod2	neurogenic differentiation 2	Rattus norvegicus neurogenic differentiation 2 (Neurod2), mRNA [NM_019326]	A_44_P458901	0.0404259	up	1.03732	Rn.10724
Dis3l2	DIS3 mitotic control homolog (S. cerevisiae)-like 2	Rattus norvegicus DIS3 mitotic control homolog (S. cerevisiae)-like 2 (Dis3l2), mRNA [NM_001109007]	A_44_P1016309	0.00546279	down	1.13788	Rn.2940
Rnf40	ring finger protein 40	Rattus norvegicus ring finger protein 40 (Rnf40), mRNA [NM_153471]	A_42_P538483	0.0352017	down	1.30087	Rn.162466
RGD1564786	similar to OTTMUSP00000000636	PREDICTED: Rattus norvegicus similar to OTTMUSP00000000636 (predicted) (RGD1564786_predicted), mRNA [XM_225265]	A_44_P330778	0.00800745	down	1.02623	Rn.78878
		AW434178 UI-R-BJ0p-aft-b-03-0-UI.s1 UI-R-BJ0p Rattus norvegicus cDNA clone UI-R-BJ0p-aft-b-03-0-UI 3', mRNA sequence [AW434178]	A_44_P535029	0.0441541	down	1.17101	Rn.7534
Inpp5d	inositol polyphosphate-5-phosphatase D	Rattus norvegicus inositol polyphosphate-5-phosphatase D (Inpp5d), mRNA [NM_019311]	A_43_P12016	0.0428122	up	1.05439	Rn.10659
LOC679126	similar to SMAD-interacting zinc finger protein 2	PREDICTED: Rattus norvegicus similar to SMAD-interacting zinc finger protein 2, transcript variant 3 (LOC679126), mRNA [XM_001054498]	A_44_P601699	0.0493933	up	2.33426	Rn.216601
		AI547958 UI-R-C3-tb-g-12-0-UI.s1 UI-R-C3 Rattus norvegicus cDNA clone UI-R-C3-tb-g-12-0-UI 3', mRNA sequence [AI547958]	A_44_P317866	0.00243451	down	1.19405	Rn.145303
Olr95	olfactory receptor 95	Rattus norvegicus olfactory receptor 95 (Olr95), mRNA [NM_001001024]	A_44_P118734	0.0351835	down	1.11561	Rn.141892
		RVL17053 Wackym-Soares normalized rat vestibular cDNA library Rattus norvegicus cDNA 5', mRNA sequence [DV724961]	A_42_P543633	0.0425455	down	4.11404	Rn.94903
Rsbn1	round spermatid basic protein 1	PREDICTED: Rattus norvegicus rosbin, round spermatid basic protein 1 (predicted) (Rsbn1_predicted), mRNA [XM_227540]	A_44_P379947	0.000184486	down	1.06167	Rn.38954
		AI009781 EST204232 Normalized rat lung, Bento Soares Rattus sp. cDNA clone RLUBO38 3' end, mRNA sequence [AI009781]	A_44_P298668	0.0268157	up	1.40946	Rn.220101
Atg5	ATG5 autophagy related 5 homolog (S. cerevisiae)	Rattus norvegicus ATG5 autophagy related 5 homolog (S. cerevisiae) (Atg5), mRNA [NM_001014250]	A_44_P761066	0.012846	down	1.13688	Rn.98385
		BG372727 UI-R-CV1-brz-g-09-0-UI.s1 UI-R-CV1 Rattus norvegicus cDNA clone UI-R-CV1-brz-g-09-0-UI 3', mRNA sequence [BG372727]	A_44_P235767	0.0378859	down	1.04156	Rn.162577
LOC690692	hypothetical protein LOC690692	PREDICTED: Rattus norvegicus hypothetical protein LOC690692 (LOC690692), mRNA [XM_001075250]	A_44_P952502	0.0365949	down	1.24218	Rn.154176
Ezh1	enhancer of zeste homolog 1 (Drosophila)	Rattus norvegicus enhancer of zeste homolog 1 (Drosophila) (Ezh1), mRNA [NM_001107051]	A_44_P105722	0.0213469	up	1.3143	Rn.154549
Eea1	early endosome antigen 1	Rattus norvegicus early endosome antigen 1 (Eea1), mRNA [NM_001108086]	A_44_P513747	0.0220388	down	1.32863	Rn.23513
Cpa1	carboxypeptidase A1	Rattus norvegicus carboxypeptidase A1 (Cpa1), mRNA [NM_016998]	A_43_P11766	0.0115822	up	4.09733	Rn.9576
Tmem67	transmembrane protein 67	Rattus norvegicus transmembrane protein 67 (Tmem67), mRNA [NM_001107916]	A_44_P419717	0.0264847	up	1.11701	Rn.72665
		BI295497 UI-R-DK0-cev-a-10-0-UI.s1 UI-R-DK0 Rattus norvegicus cDNA clone UI-R-DK0-cev-a-10-0-UI 3', mRNA sequence [BI295497]	A_44_P112758	0.035511	down	1.25028	Rn.13655
Zbtb10	zinc finger and BTB domain containing 10	Rattus norvegicus zinc finger and BTB domain containing 10 (Zbtb10), mRNA [NM_024489]	A_44_P219926	0.0112929	up	1.27883	Rn.162568
Trdn	triadin	Rattus norvegicus triadin (Trdn), mRNA [NM_021666]	A_44_P191715	0.00911765	up	1.92468	Rn.41863
Fam108c1	family with sequence similarity 108, member C1"		A_44_P155109	0.0424221	down	1.08541	chr1:140387306-140383792
		BI289075 UI-R-DK0-cfe-b-08-0-UI.s1 UI-R-DK0 Rattus norvegicus cDNA clone UI-R-DK0-cfe-b-08-0-UI 3', mRNA sequence [BI289075]	A_44_P251677	0.0121787	down	1.22972	Rn.16775
			A_44_P668888	0.0370951	up	3.52223
Hes2	hairy and enhancer of split 2 (Drosophila)	Rattus norvegicus hairy and enhancer of split 2 (Drosophila) (Hes2), mRNA [NM_019236]	A_44_P353520	0.0197551	down	1.3972	Rn.44655
Gprin2	G protein regulated inducer of neurite outgrowth 2	PREDICTED: Rattus norvegicus similar to Hypothetical protein KIAA0514 (predicted) (RGD1308922_predicted), mRNA [XM_001059778]	A_44_P210763	0.0166245	down	1.57277
			A_44_P288785	0.0233656	down	1.24986
		FM112931 etnohea Rattus norvegicus cDNA clone etnoheaP0023P10 5', mRNA sequence [FM112931]	A_44_P900333	0.0309013	up	1.35713	Rn.33382
Sema5a	sema domain, seven thrombospondin repeats (type 1 and type 1-like), transmembrane domain (TM) and short cytoplasmic domain, (semaphorin) 5A"		A_44_P793873	0.0243224	down	1.09505	chr2:85153515-85153574
Amigo3	adhesion molecule with Ig like domain 3	Rattus norvegicus adhesion molecule with Ig like domain 3 (Amigo3), mRNA [NM_178144]	A_44_P182220	0.0372854	down	1.46431	Rn.203829
Kif7	kinesin family member 7	PREDICTED: Rattus norvegicus kinesin family member 7 (predicted) (Kif7_predicted), mRNA [XM_218828]	A_44_P1013667	0.0197152	up	1.36326	Rn.145008
Klf1	Kruppel-like factor 1 (erythroid)	Rattus norvegicus Kruppel-like factor 1 (erythroid) (Klf1), mRNA [NM_001107164]	A_44_P217964	0.0222067	down	1.64544	Rn.23089
			A_44_P768805	0.00753166	down	1.14696
		AA955251 UI-R-A1-ej-h-09-0-UI.s1 UI-R-A1 Rattus norvegicus cDNA clone UI-R-A1-ej-h-09-0-UI 3' similar to gi [AA955251]	A_44_P843363	0.0432201	up	1.79512	Rn.8720
		UI-R-A1-el-c-06-0-UI.s10 UI-R-A1 Rattus norvegicus cDNA clone UI-R-A1-el-c-06-0-UI 3', mRNA sequence [CK840108]	A_44_P128995	0.0441855	down	1.14442	Rn.203504
Brip1	BRCA1 interacting protein C-terminal helicase 1	PREDICTED: Rattus norvegicus BRCA1 interacting protein C-terminal helicase 1 (predicted) (Brip1_predicted), mRNA [XM_340869]	A_44_P838888	0.0348198	down	1.15201	Rn.101065
			A_44_P669900	0.0353151	up	1.26145
LOC687105	hypothetical protein LOC687105	Rattus norvegicus hypothetical protein LOC687105 (LOC687105), mRNA [NM_001127591]	A_44_P699502	0.0228543	down	1.11583	Rn.216416
		BQ208687 UI-R-DY1-cnu-b-02-0-UI.s1 NCI_CGAP_DY1 Rattus norvegicus cDNA clone IMAGE:7334788 3', mRNA sequence [BQ208687]	A_44_P492707	0.0222992	down	1.166	Rn.40184
		AI028932 UI-R-C0-io-a-08-0-UI.s1 UI-R-C0 Rattus norvegicus cDNA clone UI-R-C0-io-a-08-0-UI 3', mRNA sequence [AI028932]	A_44_P315773	0.0382809	down	1.54701	Rn.6332
Msmb	microseminoprotein, beta"		A_43_P11966	0.00402378	down	1.13408	chr16:7627261-7639750
Paqr4	progestin and adipoQ receptor family member IV	Rattus norvegicus progestin and adipoQ receptor family member IV (Paqr4), mRNA [NM_001017377]	A_44_P126597	0.0319664	down	1.2809	Rn.11767
Nup188	nucleoporin 188	Nup188 protein (Fragment). [Source:UniProtKB/TrEMBL;Acc:Q5RJY5] [ENSRNOT00000030996]	A_44_P351795	0.00268774	down	1.0891	Rn.11918
Irf9	interferon regulatory factor 9	Rattus norvegicus interferon regulatory factor 9 (Irf9), mRNA [NM_001012041]	A_44_P346959	0.00808785	up	1.26786	Rn.163277
Cep27l	centrosomal protein 27 like	PREDICTED: Rattus norvegicus centrosomal protein 27 (predicted) (Cep27_predicted), mRNA [XM_001076273]	A_44_P898864	0.0297484	up	1.21157	Rn.167511
Sec24a	SEC24 family, member A (S. cerevisiae)"		A_44_P452883	0.02869	down	1.29211	chr10:37262719-37262660
		BF558419 UI-R-A1-et-e-08-0-UI.r1 UI-R-A1 Rattus norvegicus cDNA clone UI-R-A1-et-e-08-0-UI 5', mRNA sequence [BF558419]	A_44_P293774	0.00812083	up	1.24823	Rn.164925
		AI059371 UI-R-C1-ld-f-09-0-UI.s1 UI-R-C1 Rattus norvegicus cDNA clone UI-R-C1-ld-f-09-0-UI 3', mRNA sequence [AI059371]	A_44_P453850	0.0234177	up	1.59014	Rn.204157
Tbx20	T-box 20	Rattus norvegicus similar to T-box 20 (LOC315497), mRNA [XM_235974]	A_44_P494804	0.0269283	down	1.11936
Fbln2	fibulin 2	PREDICTED: Rattus norvegicus fibulin 2, transcript variant 2 (Fbln2), mRNA [XM_232197]	A_44_P174476	0.0363253	down	1.29037	Rn.7350
		BQ201831 UI-R-DO1-cml-k-24-0-UI.s1 UI-R-DO1 Rattus norvegicus cDNA clone UI-R-DO1-cml-k-24-0-UI 3', mRNA sequence [BQ201831]	A_44_P336326	0.0102275	up	1.31448	Rn.7479
		RVL16670 Wackym-Soares normalized rat vestibular cDNA library Rattus norvegicus cDNA 5', mRNA sequence [DV724602]	A_44_P902933	0.0306217	down	1.33233	Rn.147637
Ctrl	chymotrypsin-like	Rattus norvegicus chymotrypsin-like (Ctrl), mRNA [NM_054009]	A_44_P379012	0.0396581	up	1.34431	Rn.63352
		AW916183 EST347487 Rat gene index, normalized rat, norvegicus, Bento Soares Rattus norvegicus cDNA clone RGIDJ14 5' end, mRNA sequence [AW916183]	A_42_P644800	0.0431746	up	1.90934	Rn.17973
Pcdhb20	protocadherin beta 20	Rattus norvegicus protocadherin beta 20 (Pcdhb20), mRNA [NM_001109395]	A_44_P788355	0.0411737	up	1.69201	Rn.198396
			A_44_P426764	0.0380615	down	1.24165
		UI-R-C3-sg-b-08-0-UI.s1 UI-R-C3 Rattus norvegicus cDNA clone UI-R-C3-sg-b-08-0-UI 3', mRNA sequence [AI511198]	A_44_P1048864	0.0339802	up	1.81647	Rn.166773
Slc27a2	solute carrier family 27 (fatty acid transporter), member 2"		A_43_P12655	0.0206265	down	1.11004	chr3:114114177-114114236
LOC365791	similar to T-cell activation Rho GTPase-activating protein isoform b	Rattus norvegicus similar to T-cell activation Rho GTPase-activating protein isoform b (LOC365791), mRNA [NM_001014252]	A_44_P288428	0.045487	down	1.25895	Rn.128853
		Pecanex 1 (Fragment). [Source:UniProtKB/TrEMBL;Acc:Q5G7W4] [ENSRNOT00000058217]	A_44_P745488	0.037742	up	1.18508	Rn.23381
Lyk5	protein kinase LYK5	Rattus norvegicus protein kinase LYK5 (Lyk5), mRNA [NM_182820]	A_43_P10545	0.0476302	up	1.25666	Rn.11563
Olr1243	olfactory receptor 1243	Rattus norvegicus olfactory receptor 1243 (Olr1243), mRNA [NM_001000451]	A_44_P276253	0.0307638	down	1.26616	Rn.143527
Pip5k3	phosphatidylinositol-3-phosphate/phosphatidylinositol 5-kinase, type III"		A_44_P208896	0.0404115	down	1.79345	chr9:63889969-63890546
Gtf2i	general transcription factor II I	Rattus norvegicus general transcription factor II I (Gtf2i), mRNA [NM_001001512]	A_44_P402584	0.0459941	up	1.07238	Rn.27575
		AI229633 EST226328 Normalized rat embryo, Bento Soares Rattus sp. cDNA clone REMCJ67 3' end, mRNA sequence [AI229633]	A_44_P567252	0.0421799	down	1.3337	Rn.34942
Mylk3	myosin light chain kinase 3	Rattus norvegicus myosin light chain kinase 3 (Mylk3), mRNA [NM_001110810]	A_44_P100716	0.0303841	down	1.24641	Rn.204358
		UI-R-C4-alj-b-07-0-UI.s1 UI-R-C4 Rattus norvegicus cDNA clone UI-R-C4-alj-b-07-0-UI 3', mRNA sequence [AW532167]	A_44_P450856	0.000162989	down	1.13008	Rn.169961
RGD1561849	similar to RIKEN cDNA 3110035E14	Rattus norvegicus similar to RIKEN cDNA 3110035E14 (RGD1561849), mRNA [NM_001109260]	A_44_P884766	0.00630045	down	1.64895	Rn.18085
Ucp1	uncoupling protein 1 (mitochondrial, proton carrier)"		A_42_P614984	0.0375029	down	1.21494	chr19:26527746-26527687
		UI-R-A1-en-d-06-0-UI.s1 UI-R-A1 Rattus norvegicus cDNA clone UI-R-A1-en-d-06-0-UI 3', mRNA sequence [AA925164]	A_44_P263334	0.0212921	down	1.57731	Rn.131851
			A_44_P791286	0.0276319	down	1.22948
		Rattus norvegicus LRRGT00106 mRNA, complete cds. [AY387092]	A_44_P505869	0.029119	down	1.10957
Rbm27	RNA binding motif protein 27	RNA binding motif protein 27 [Source:RefSeq_peptide;Acc:NP_001101899] [ENSRNOT00000060199]	A_44_P295669	0.0482735	up	1.14071	Rn.20946
Znf494	zinc finger protein 494	PREDICTED: Rattus norvegicus zinc finger protein 494 (predicted) (Znf494_predicted), mRNA [XM_234948]	A_44_P166449	0.0157697	up	1.10904
		PREDICTED: Rattus norvegicus similar to KP78b CG17216-PA (LOC365499), mRNA [XM_345056]	A_44_P335151	0.0304489	down	2.50505	Rn.159835
		UI-R-DZ0-cmz-a-08-0-UI.s1 UI-R-DZ0 Rattus norvegicus cDNA clone UI-R-DZ0-cmz-a-08-0-UI 3', mRNA sequence [CN541265]	A_44_P193865	0.0276334	down	1.18546	Rn.155127
			A_44_P137641	0.0348686	down	1.1866
Ltb4r	leukotriene B4 receptor	Rattus norvegicus leukotriene B4 receptor (Ltb4r), mRNA [NM_021656]	A_43_P15544	0.0275572	down	1.46095	Rn.41003
Tbc1d24	TBC1 domain family, member 24	Rattus norvegicus TBC1 domain family, member 24 (Tbc1d24), mRNA [NM_001105769]	A_44_P523289	0.0247272	down	1.21726	Rn.46448
Hlx	H2.0-like homeobox	Rattus norvegicus H2.0-like homeobox (Hlx), mRNA [NM_001077674]	A_44_P463954	0.0465788	down	1.27605	Rn.35243
LOC683719	similar to RAS and EF hand domain containing	PREDICTED: Rattus norvegicus similar to RAS and EF hand domain containing (LOC683719), mRNA [XM_001067187]	A_44_P286273	0.0466767	up	1.34737	Rn.92270
		AI008339 EST202790 Normalized rat embryo, Bento Soares Rattus sp. cDNA clone REMAW08 3' end, mRNA sequence [AI008339]	A_44_P327466	0.0124996	down	1.79793	Rn.137980
			A_44_P840348	0.0370712	up	1.71834
		Rat mRNA for preoptic regulatory factor-1 (PORF-1). [X53231]	A_43_P12296	0.0190487	up	1.11689
Vangl2	vang-like 2 (van gogh, Drosophila)"		A_44_P147138	0.0375189	down	1.41719	chr13:87969697-87968819
Abcg2	ATP-binding cassette, sub-family G (WHITE), member 2"		A_44_P402464	0.0189839	up	1.37663	chr4:87558205-87559781
		AE008377 AGR_L_3498p {Agrobacterium tumefaciens str. C58} (exp=0; wgp=1; cg=0), partial (4%) [TC614250]	A_44_P644149	0.0436063	up	1.06105
			A_44_P822204	0.0266793	down	1.08401
LOC365476	similar to chromosome 10 open reading frame 79	PREDICTED: Rattus norvegicus similar to chromosome 10 open reading frame 79 (LOC365476), mRNA [XM_345041]	A_44_P286035	0.00801029	down	1.36152	Rn.104903
Cited1	Cbp/p300-interacting transactivator with Glu/Asp-rich carboxy-terminal domain 1	Rattus norvegicus Cbp/p300-interacting transactivator with Glu/Asp-rich carboxy-terminal domain 1 (Cited1), mRNA [NM_172055]	A_44_P547771	0.0406763	down	2.22229	Rn.8163
Tgfbi	transforming growth factor, beta induced"		A_44_P620106	0.0213419	down	1.6517	chr17:13905314-13905255
LOC681251	hypothetical protein LOC681251	PREDICTED: Rattus norvegicus hypothetical protein LOC681251 (LOC681251), mRNA [XM_001060948]	A_44_P788147	0.0454019	down	1.69643	Rn.45721
		AW917233 EST348537 Rat gene index, normalized rat, norvegicus, Bento Soares Rattus norvegicus cDNA clone RGIEB05 5' end, mRNA sequence [AW917233]	A_44_P727817	0.013904	up	1.19117	Rn.201834
		UI-R-CA1-bcw-b-01-0-UI.s1 UI-R-CA1 Rattus norvegicus cDNA clone UI-R-CA1-bcw-b-01-0-UI 3', mRNA sequence [BF391580]	A_44_P336444	0.00893261	up	1.15599	Rn.154131
		Rattus norvegicus similar to Spindlin-like protein 2 (SPIN-2) (LOC316768), mRNA [XM_237571]	A_44_P394246	0.019846	down	1.1516
RGD1307595	similar to RIKEN cDNA 1700018B24	Rattus norvegicus similar to RIKEN cDNA 1700018B24 (RGD1307595), mRNA [NM_001134511]	A_43_P19286	0.0182784	down	1.24765	Rn.46896
		Rattus norvegicus similar to Cca3 protein (LOC299690), mRNA [XM_234990]	A_44_P377781	0.0268264	down	1.20463
		PREDICTED: Rattus norvegicus similar to elongin B isoform b (predicted) (RGD1563330_predicted), mRNA [XR_009020]	A_44_P274414	0.0411352	down	1.18877	Rn.195793
Plxnd1	plexin D1	Rattus norvegicus plexin D1 (Plxnd1), mRNA [NM_001107881]	A_44_P274573	0.00778846	down	1.1313	Rn.21111
			A_44_P433701	0.00664258	down	1.31999
Vegfa	vascular endothelial growth factor A	Rattus norvegicus vascular endothelial growth factor A (Vegfa), transcript variant 1, mRNA [NM_031836]	A_44_P300751	0.0400279	down	1.18232	Rn.1923
Stfa3	stefin A3	UI-R-DD0-bzx-g-05-0-UI.s1 UI-R-DD0 Rattus norvegicus cDNA clone UI-R-DD0-bzx-g-05-0-UI 3', mRNA sequence [BI282513]	A_44_P836100	0.0120231	down	1.25196	Rn.78016
Uba6	ubiquitin-like modifier activating enzyme 6	Rattus norvegicus ubiquitin-like modifier activating enzyme 6 (Uba6), mRNA [NM_001107213]	A_44_P555378	0.00167639	down	1.2227	Rn.94245
			A_44_P733106	0.0209143	up	1.56966
Acot5	acyl-CoA thioesterase 5	Rattus norvegicus acyl-CoA thioesterase 5 (Acot5), mRNA [NM_001079709]	A_44_P775866	0.0177479	down	1.0494	Rn.145861
		BI295164 UI-R-DK0-ceg-e-08-0-UI.s1 UI-R-DK0 Rattus norvegicus cDNA clone UI-R-DK0-ceg-e-08-0-UI 3', mRNA sequence [BI295164]	A_44_P124367	0.00971138	down	1.20194	Rn.15285
		Rattus norvegicus similar to interleukin 17F, transcript variant (LOC301291), mRNA [XM_236987]	A_44_P302624	0.0010313	down	1.28553
		Muscleblind-like protein BLES04 (Fragment). [Source:UniProtKB/TrEMBL;Acc:Q8CIQ0] [ENSRNOT00000018867]	A_44_P132815	0.00609321	down	1.18674	Rn.205513
Fgfbp1	fibroblast growth factor binding protein 1	Rattus norvegicus fibroblast growth factor binding protein 1 (Fgfbp1), mRNA [NM_022603]	A_44_P465233	0.00641748	up	1.33227	Rn.6346
		BP483355 Rattus norvegicus pancreatic islet Rattus norvegicus cDNA clone RBC05164 5', mRNA sequence [BP483355]	A_42_P700150	0.0276953	up	1.47664	Rn.199375
		AGENCOURT_109870484 NIH_MGC_420 Rattus norvegicus cDNA clone IMAGE:9033655 5', mRNA sequence [EV763920]	A_44_P573268	0.0167817	down	1.13821	Rn.35353
Znf498	zinc finger protein 498	Rattus norvegicus zinc finger protein 498 (Znf498), mRNA [NM_001108851]	A_42_P607215	0.0364944	down	1.31819	Rn.24025
Qrich2	glutamine rich 2	PREDICTED: Rattus norvegicus similar to hypothetical protein DKFZp434P0316 (predicted) (RGD1562974_predicted), mRNA [XM_001081721]	A_42_P719350	0.00319667	down	1.19528
Supplementary Table S1-A: Differentially Expressed Genes in Old Injured Versus Young Control Iliac Arteries at 30 Minutes Post-Injury.
Listed are the 1908 total transcripts differentially expressed by 2 fold ( p<.05 with no multiple correction) in old Injured versus young control iliac arteries at 30 minutes post injury (n=3 per group).

## Sheet: 3Days inj w age p05 
GeneSymbol	GeneName	Description	ID	p-value	regulation	FCAbsolute	UniGeneID
			A_44_P959751	0.0453567	down	1.17697
		AW533317 UI-R-BU0-anf-d-12-0-UI.s1 UI-R-BU0 Rattus norvegicus cDNA clone UI-R-BU0-anf-d-12-0-UI 3', mRNA sequence [AW533317]	A_44_P453728	0.0129587	down	1.76202	Rn.10557
Ppp3r1	protein phosphatase 3, regulatory subunit B, alpha isoform (calcineurin B, type I)"		A_44_P149148	0.0437612	down	1.1669	chr14:98093248-98093307
			(+)E1A_r60_n11	0.00823895	up	1.12209
LOC685424	hypothetical protein LOC685424	PREDICTED: Rattus norvegicus hypothetical protein LOC685424 (LOC685424), mRNA [XM_001063747]	A_44_P485305	0.00687589	down	1.12933
RGD1561829	similar to hypothetical protein	PREDICTED: Rattus norvegicus similar to hypothetical protein (predicted) (RGD1561829_predicted), mRNA [XM_001068914]	A_44_P421855	0.0313434	down	1.49825
Olr519	olfactory receptor 519	Rattus norvegicus olfactory receptor 519 (Olr519), mRNA [NM_001000318]	A_44_P318408	0.00864937	up	1.49241	Rn.142932
			A_44_P978775	0.04151	up	1.39644
Slmo1	slowmo homolog 1 (Drosophila)	Rattus norvegicus slowmo homolog 1 (Drosophila) (Slmo1), mRNA [NM_001109570]	A_44_P227277	0.0283534	down	1.39281	Rn.163381
Dullard	Dullard homolog (Xenopus laevis)	Serine/threonine-protein phosphatase dullard (EC 3.1.3.16). [Source:UniProtKB/Swiss-Prot;Acc:Q3B7T6] [ENSRNOT00000023379]	A_44_P206550	0.0381551	down	1.12152	Rn.4211
		PREDICTED: Rattus norvegicus golgi phosphoprotein 2 (predicted) (Golph2_predicted), mRNA [XM_225147]	A_44_P775513	0.0239789	up	1.21581	Rn.198322
		Q3X0B2_9ACTN (Q3X0B2) Sulfatase, partial (3%) [TC620042]	A_44_P871871	0.0376266	down	1.29232
Syngap1	synaptic Ras GTPase activating protein 1 homolog (rat)	Rattus norvegicus synaptic Ras GTPase activating protein 1 homolog (rat) (Syngap1), transcript variant 1, mRNA [NM_181092]	A_44_P470444	0.00574447	down	2.15385	Rn.9908
Glis2	GLIS family zinc finger 2	Rattus norvegicus GLIS family zinc finger 2 (Glis2), mRNA [NM_001106978]	A_43_P19242	0.00488379	up	1.80531	Rn.166996
Sec16a	SEC16 homolog A (S. cerevisiae)	PREDICTED: Rattus norvegicus inositol polyphosphate-5-phosphatase E (Inpp5e), mRNA [XM_342391]	A_44_P462285	0.0107144	down	1.16306	Rn.6975
RGD1310773	similar to hypothetical protein FLJ31810	Rattus norvegicus similar to hypothetical protein FLJ31810 (RGD1310773), mRNA [NM_001107926]	A_44_P403260	0.0491364	up	1.38894	Rn.16996
			A_44_P358743	0.0425196	up	1.25639
Taf2	TAF2 RNA polymerase II, TATA box binding protein (TBP)-associated factor"		A_44_P468312	0.0233677	down	2.24646	chr7:91560883-91558257
Tgm2	transglutaminase 2, C polypeptide"		A_44_P1007347	0.046109	up	1.24903	chr3:148832926-148832867
LOC689088	similar to low density lipoprotein receptor A domain containing 1	PREDICTED: Rattus norvegicus similar to low density lipoprotein receptor A domain containing 1 (LOC689088), mRNA [XM_001069480]	A_44_P845503	0.0124213	down	1.20969	Rn.141481
			A_44_P201473	0.016654	up	1.22499
Samd4b	sterile alpha motif domain containing 4B	Rattus norvegicus sterile alpha motif domain containing 4B (Samd4b), mRNA [NM_001107498]	A_44_P515577	0.0332487	down	2.42358	Rn.40291
			A_44_P419472	0.0193077	down	1.08621
Cops8	COP9 constitutive photomorphogenic homolog subunit 8 (Arabidopsis)	Rattus norvegicus COP9 constitutive photomorphogenic homolog subunit 8 (Arabidopsis) (Cops8), mRNA [NM_001013227]	A_44_P276297	0.0137167	up	1.12117	Rn.99919
		Dynein axonemal heavy chain-like protein (Fragment). [Source:UniProtKB/TrEMBL;Acc:Q2KML4] [ENSRNOT00000048270]	A_44_P523294	0.0141222	up	1.19259	Rn.214176
		Rattus norvegicus similar to glyceraldehyde-3-phosphate dehydrogenase (LOC303448), mRNA [XM_220863]	A_44_P366222	0.0359592	up	1.26338
		RVL18832 Wackym-Soares normalized rat vestibular cDNA library Rattus norvegicus cDNA 5', mRNA sequence [DV726492]	A_44_P767548	0.0464027	down	1.24739	Rn.169285
		BF282153 EST446744 Rat Gene Index, normalized rat, Rattus norvegicus cDNA Rattus norvegicus cDNA clone RGIDC87 3' sequence, mRNA sequence [BF282153]	A_44_P267908	0.0101361	down	1.64484	Rn.16668
Mro	maestro	PREDICTED: Rattus norvegicus similar to maestro (predicted) (RGD1559803_predicted), mRNA [XM_001053368]	A_43_P19260	0.0183276	up	1.14726	Rn.155491
Gata6	GATA binding protein 6	Rattus norvegicus GATA binding protein 6 (Gata6), mRNA [NM_019185]	A_44_P415354	0.0436708	down	1.24057	Rn.8701
Dclk2	doublecortin-like kinase 2	Rattus norvegicus doublecortin-like kinase 2 (Dclk2), mRNA [NM_001009691]	A_44_P253048	0.0494807	up	1.11339	Rn.23327
		UI-R-CY0-bxs-d-02-0-UI.s1 UI-R-CY0 Rattus norvegicus cDNA clone UI-R-CY0-bxs-d-02-0-UI 3', mRNA sequence [BI277534]	A_44_P677828	0.0179787	up	1.26298	Rn.122326
		AI547847 UI-R-C3-sk-f-04-0-UI.s1 UI-R-C3 Rattus norvegicus cDNA clone UI-R-C3-sk-f-04-0-UI 3', mRNA sequence [AI547847]	A_44_P249731	0.0359362	down	1.51067	Rn.199173
Myo6	myosin VI		A_44_P373153	0.00808889	up	1.04063	Rn.18047
		AI231047 EST227735 Normalized rat embryo, Bento Soares Rattus sp. cDNA clone REMDE62 3' end, mRNA sequence [AI231047]	A_44_P362909	0.0402642	up	2.21386	Rn.7051
		Rattus norvegicus similar to Alkaline phosphatase, embryonic precursor (EAP) (LOC301585), mRNA [XM_237353]	A_44_P431717	0.0152954	up	1.90383
		AI234962 EST231524 Normalized rat ovary, Bento Soares Rattus sp. cDNA clone ROVCK73 3' end, mRNA sequence [AI234962]	A_44_P150719	0.016048	down	1.67127	Rn.92067
Snx32	sorting nexin 32	PREDICTED: Rattus norvegicus similar to Sorting nexin 6 (TRAF4-associated factor 2) (predicted) (RGD1560591_predicted), mRNA [XM_341993]	A_44_P260227	0.0405379	down	1.23861	Rn.40837
		Rattus norvegicus similar to gamma-1 syntrophin (LOC366298), mRNA [XM_345497]	A_44_P344899	0.0461486	down	1.49794
			A_44_P119460	0.0204017	up	1.43704
		CB546198 AMGNNUC:NRDG1-00118-G3-A nrdg1 (10855) Rattus norvegicus cDNA clone nrdg1-00118-g3 5', mRNA sequence [CB546198]	A_44_P166790	0.0479336	up	1.15187	Rn.48099
		BF406174 UI-R-CA1-bjf-m-05-0-UI.s1 UI-R-CA1 Rattus norvegicus cDNA clone UI-R-CA1-bjf-m-05-0-UI 3', mRNA sequence [BF406174]	A_44_P497652	0.0260599	down	1.22474	Rn.106719
		Q7TP95_RAT (Q7TP95) Ab1-351, partial (3%) [TC597721]	A_44_P945931	0.0417103	up	1.82362
		AW524359 UI-R-BO0-ahj-d-07-0-UI.s1 UI-R-BO0 Rattus norvegicus cDNA clone UI-R-BO0-ahj-d-07-0-UI 3', mRNA sequence [AW524359]	A_44_P381424	0.00665178	down	1.42803	Rn.206251
Mrpl51	mitochondrial ribosomal protein L51	Rattus norvegicus mitochondrial ribosomal protein L51 (Mrpl51), nuclear gene encoding mitochondrial protein, mRNA [NM_001106621]	A_44_P1028282	0.0228047	up	1.14173	Rn.154504
Pgam1	phosphoglycerate mutase 1 (brain)	Rattus norvegicus phosphoglycerate mutase 1 (brain) (Pgam1), mRNA [NM_053290]	A_43_P12753	0.0107621	down	1.11491	Rn.1383
Actrt1	actin-related protein T1	Rattus norvegicus actin-related protein T1 (Actrt1), mRNA [NM_001013961]	A_44_P518339	0.00937048	down	2.18397	Rn.110052
			A_44_P103205	0.00211646	up	1.25679
Brdt	bromodomain, testis-specific"		A_44_P520349	0.00550257	down	1.19872	chr14:2954625-2954566
Cxcl14	chemokine (C-X-C motif) ligand 14	Rattus norvegicus chemokine (C-X-C motif) ligand 14 (Cxcl14), mRNA [NM_001013137]	A_44_P247286	0.0322337	up	1.31567	Rn.3130
Mrps2	mitochondrial ribosomal protein S2	Rattus norvegicus mitochondrial ribosomal protein S2 (Mrps2), nuclear gene encoding mitochondrial protein, mRNA [NM_001108576]	A_44_P606810	0.00322974	down	1.16984	Rn.48907
Folh1	folate hydrolase	Rattus norvegicus folate hydrolase (Folh1), mRNA [NM_057185]	A_42_P657469	0.0128703	down	1.51614	Rn.89278
RGD1311186	similar to RIKEN cDNA 1810014F10 gene	Rattus norvegicus similar to RIKEN cDNA 1810014F10 gene (RGD1311186), mRNA [NM_001106310]	A_42_P696282	0.0415187	up	1.1394	Rn.22205
Fndc8	fibronectin type III domain containing 8	Rattus norvegicus fibronectin type III domain containing 8 (Fndc8), mRNA [NM_001107030]	A_44_P267778	0.0301305	down	1.22248	Rn.144928
Fkbp1a	FK506 binding protein 1a	Rattus norvegicus FK506 binding protein 1a (Fkbp1a), mRNA [NM_013102]	A_44_P538406	0.0103413	up	1.1282	Rn.80611
Tomm5	translocase of outer mitochondrial membrane 5 homolog (yeast)	Rattus norvegicus strain WF putative large non-coding mRNA sequence [DQ901406]	A_44_P174261	0.0478857	up	1.14109	Rn.7385
			A_44_P852201	0.0131214	up	1.75886
Chrna7	cholinergic receptor, nicotinic, alpha 7"		A_43_P16274	0.0186832	down	1.16112	chr1:117587102-117587043
Pcdhb4	protocadherin beta 4	Rattus norvegicus protocadherin beta 4 (Pcdhb4), mRNA [NM_001114601]	A_44_P279011	0.00906189	down	1.35312	Rn.219210
		BE109381 UI-R-BJ1-aur-d-07-0-UI.s1 UI-R-BJ1 Rattus norvegicus cDNA clone UI-R-BJ1-aur-d-07-0-UI 3', mRNA sequence [BE109381]	A_44_P167016	0.0408558	up	1.47897	Rn.17292
Lag3	lymphocyte-activation gene 3	Rattus norvegicus lymphocyte-activation gene 3 (Lag3), mRNA [NM_212513]	A_44_P438013	0.0233772	down	1.16414	Rn.198703
Peli2	pellino 2	Rattus norvegicus pellino 2 (Peli2), mRNA [NM_001107259]	A_44_P1020477	0.0088105	down	1.51694	Rn.210929
Rapgef1	Rap guanine nucleotide exchange factor (GEF) 1	Rattus norvegicus partial mRNA for C3G protein (c3g gene) [AJ249986]	A_43_P15739	0.0493997	up	1.06598	Rn.85879
Rps6kc1	ribosomal protein S6 kinase, polypeptide 1"		A_44_P297398	0.00820111	down	1.15086	chr13:106842677-106842618
		AI170660 EST216595 Normalized rat muscle, Bento Soares Rattus sp. cDNA clone RMUAZ59 3' end, mRNA sequence [AI170660]	A_44_P488939	0.0411632	up	1.19186	Rn.172403
Aak1	AP2 associated kinase 1	PREDICTED: Rattus norvegicus similar to AP2 associated kinase 1 (predicted) (RGD1563580_predicted), mRNA [XM_575594]	A_43_P10392	0.0275364	down	1.60368	Rn.203307
RGD1306583	similar to RIKEN cDNA 2410002O22 gene	Rattus norvegicus similar to RIKEN cDNA 2410002O22 gene (RGD1306583), mRNA [NM_001013908]	A_42_P815485	0.0417188	up	1.05218	Rn.15285
Rab10	RAB10, member RAS oncogene family"		A_44_P413979	0.0467658	up	1.1613	chr6_random:438314-438255
G3bp1	GTPase activating protein (SH3 domain) binding protein 1	PREDICTED: Rattus norvegicus Ras-GTPase-activating protein SH3-domain binding protein (G3bp), mRNA [XM_340802]	A_44_P250194	0.00875797	up	1.21784	Rn.25201
			A_44_P352016	0.0356775	up	1.57666
Ear11	eosinophil-associated, ribonuclease A family, member 11"		A_44_P358160	0.0185608	down	1.21129	chr15_random:598559-598618
R3hdm1	R3H domain containing 1	Rattus norvegicus R3H domain containing 1 (R3hdm1), mRNA [NM_001134867]	A_42_P658005	0.00992498	down	1.28108	Rn.60443
RGD1562489	similar to 60S ribosomal protein L29 (P23)	PREDICTED: Rattus norvegicus similar to 60S ribosomal protein L29 (P23) (predicted) (RGD1562489_predicted), mRNA [XM_001071419]	A_44_P490253	0.0193057	up	1.20021
Lass4	LAG1 homolog, ceramide synthase 4"		A_44_P456876	0.0285616	down	1.41082	chr12:1257903-1257844
			A_44_P735332	0.0157967	down	1.27614
			A_44_P640923	0.0255958	up	1.18082
			A_44_P337465	0.0433115	down	1.21006	Rn.8754
		Rattus norvegicus similar to Prostate stem cell antigen precursor (LOC300014), mRNA [XM_235417]	A_44_P147633	0.0355318	down	1.58366
Lhcgr	luteinizing hormone/choriogonadotropin receptor	Rattus norvegicus luteinizing hormone/choriogonadotropin receptor (Lhcgr), mRNA [NM_012978]	A_44_P466130	0.025125	up	1.28237	Rn.11216
Adam18	ADAM metallopeptidase domain 18	ADAM 18 (A disintegrin and metalloproteinase domain 18) (Transmembrane metalloproteinase-like, disintegrin-like, and cysteine-rich protein III) (tMDC III) (Fragment). [Source:UniProtKB/Swiss-Prot;Acc:P97776] [ENSRNOT00000023805]	A_44_P550393	0.0492718	up	1.19001	Rn.42923
		AI176755 EST220349 Normalized rat ovary, Bento Soares Rattus sp. cDNA clone ROVBW41 3' end, mRNA sequence [AI176755]	A_44_P131349	0.044233	down	2.83421	Rn.22891
Lin28	lin-28 homolog (C. elegans)	Rattus norvegicus lin-28 homolog (C. elegans) (Lin28), mRNA [NM_001109269]	A_43_P22058	0.0484162	up	1.1249	Rn.147538
		AI013107 EST207782 Normalized rat spleen, Bento Soares Rattus sp. cDNA clone RSPBG67 3' end, mRNA sequence [AI013107]	A_44_P462973	0.0293042	up	1.16218	Rn.10894
RGD1310819	similar to putative protein (5S487)	Rattus norvegicus similar to putative protein (5S487) (LOC301351), mRNA [XM_237064]	A_44_P391952	0.0174687	down	1.31514	Rn.46856
			A_44_P626571	0.0125457	up	1.47664
		RNU50356 Rattus norvegicus neutrophil defensin pseudogene, partial cds [U50356]	A_44_P985801	0.0478228	down	2.07793
		AW917246 EST348550 Rat gene index, normalized rat, norvegicus, Bento Soares Rattus norvegicus cDNA clone RGIEB25 5' end, mRNA sequence [AW917246]	A_44_P426004	0.0363195	down	1.22779	Rn.7685
		Rattus norvegicus similar to hypothetical protein 4931432L23 (LOC361964), mRNA [XM_342262]	A_44_P196791	0.0416323	up	1.39343
Nr3c1	nuclear receptor subfamily 3, group C, member 1"		A_44_P477376	0.0207127	up	1.09967	chr18:32371991-32371932
Fkbp7	FK506 binding protein 7	Rattus norvegicus FK506 binding protein 7 (Fkbp7), mRNA [NM_001106485]	A_44_P410159	0.00181752	up	1.11154	Rn.82775
		UI-R-FF0-cpf-d-11-0-UI.s1 UI-R-FF0 Rattus norvegicus cDNA clone UI-R-FF0-cpf-d-11-0-UI 3', mRNA sequence [BQ783300]	A_44_P417682	0.0408452	down	1.21353	Rn.203491
Mcoln3	mucolipin 3	Rattus norvegicus mucolipin 3 (Mcoln3), mRNA [NM_001012059]	A_44_P135592	0.0394184	down	1.05829	Rn.214258
Hdmcp	mitochondrial hepatocellular carcinoma-downregulated carrier protein	Rattus norvegicus mitochondrial hepatocellular carcinoma-downregulated carrier protein (Hdmcp), nuclear gene encoding mitochondrial protein, mRNA [NM_001001509]	A_44_P264518	0.00420671	down	1.12401	Rn.109623
Gsdmd	gasdermin D	Rattus norvegicus gasdermin D (Gsdmd), mRNA [NM_001130553]	A_44_P199469	0.0287786	up	1.08085	Rn.105659
		AA848896 EST191657 Normalized rat lung, Bento Soares Rattus sp. cDNA clone RLUAH67 3' end, mRNA sequence [AA848896]	A_44_P235042	0.0369264	up	1.65546	Rn.106929
Cdh10	cadherin 10	Cadherin-10 (Fragment). [Source:UniProtKB/TrEMBL;Acc:Q8R5H2] [ENSRNOT00000013152]	A_44_P374883	0.00451143	up	1.24058	Rn.83592
Rarb	retinoic acid receptor, beta"		A_44_P404472	0.00991685	up	1.23754	chr15_random:324128-324187
Tasp1	taspase, threonine aspartase 1"		A_44_P293124	0.0283872	down	1.20917	chr3:128184358-128173453
Def8	differentially expressed in FDCP 8 homolog (mouse)	Rattus norvegicus differentially expressed in FDCP 8 homolog (mouse) (Def8), mRNA [NM_001024774]	A_44_P144964	0.0335104	down	1.30796	Rn.199064
Nsf	N-ethylmaleimide-sensitive factor	Rattus norvegicus N-ethylmaleimide-sensitive factor (Nsf), mRNA [NM_021748]	A_44_P243145	0.0406021	down	1.18483	Rn.13345
		AI070438 UI-R-C2-mq-c-11-0-UI.s1 UI-R-C2 Rattus norvegicus cDNA clone UI-R-C2-mq-c-11-0-UI 3', mRNA sequence [AI070438]	A_44_P101106	0.0411067	up	1.21588	Rn.166372
Tcp10b	t-complex protein 10b	Rattus norvegicus t-complex protein 10b (Tcp10b), mRNA [NM_001107461]	A_44_P304432	0.0498727	down	1.41887	Rn.138402
Nipsnap3a	nipsnap homolog 3A (C. elegans)	Rattus norvegicus nipsnap homolog 3A (C. elegans) (Nipsnap3a), mRNA [NM_001009422]	A_42_P785861	0.0246548	down	1.1227	Rn.8287
		Rattus norvegicus similar to Spindlin-like protein 2 (SPIN-2) (LOC301926), mRNA [XM_229422]	A_44_P485440	0.0341151	up	1.20299
			A_44_P755355	0.00479681	down	1.18378
		BE116870 UI-R-BS1-azg-b-12-0-UI.s1 UI-R-BS1 Rattus norvegicus cDNA clone UI-R-BS1-azg-b-12-0-UI 3', mRNA sequence [BE116870]	A_44_P183654	0.0293238	up	1.54007
		Q2YFS5_MOUSE (Q2YFS5) BIPL1, partial (3%) [TC619361]	A_44_P592008	0.00787673	down	1.16224
Rps18	ribosomal protein S18	Rattus norvegicus ribosomal protein S18 (Rps18), mRNA [NM_213557]	A_42_P582859	0.0273027	down	1.41274	Rn.42766
LOC678868	similar to PDZ domain containing 10	PREDICTED: Rattus norvegicus similar to PDZ domain containing 10 (LOC678868), mRNA [XM_001053582]	A_44_P527699	0.0280703	up	1.48518
			A_44_P452410	0.0476926	up	2.07425
Rbck1	RanBP-type and C3HC4-type zinc finger containing 1	Rattus norvegicus RanBP-type and C3HC4-type zinc finger containing 1 (Rbck1), mRNA [NM_021764]	A_44_P131897	0.00546562	down	1.11293	Rn.37161
Tbc1d14	TBC1 domain family, member 14"		A_43_P21345	0.0321514	down	1.21062	chr14:79840690-79840749
			A_44_P823878	0.0122972	up	1.29014
		Q306F7_HUMAN (Q306F7) Down syndrome encephalopathy related protein 1, partial (13%) [TC630021]	A_44_P913290	0.0260443	up	1.29884
		BI303540 UI-R-DQ0-cja-f-15-0-UI.s1 UI-R-DQ0 Rattus norvegicus cDNA clone UI-R-DQ0-cja-f-15-0-UI 3', mRNA sequence [BI303540]	A_44_P270683	0.0388009	down	1.33039	Rn.203433
Fras1	Fraser syndrome 1 homolog (human)	PREDICTED: Rattus norvegicus Fraser syndrome 1 homolog (human) (predicted) (Fras1_predicted), mRNA [XM_214004]	A_44_P405290	0.0323709	down	1.4858	Rn.23357
Scara3	scavenger receptor class A, member 3"		A_44_P305272	0.0391665	down	1.27667	chr15:45346266-45346207
Atp10d	ATPase, class V, type 10D"		A_44_P326717	1.36775e-06	down	1.14098	chr14:38344019-38343960
		Rattus norvegicus similar to RIKEN cDNA 4930414C09 (LOC367739), mRNA [XM_346273]	A_44_P149842	0.0281888	down	1.32634
		BQ199904 UI-R-DQ1-cli-l-05-0-UI.s1 UI-R-DQ1 Rattus norvegicus cDNA clone UI-R-DQ1-cli-l-05-0-UI 3', mRNA sequence [BQ199904]	A_44_P273383	0.0250181	down	1.67195	Rn.167583
		E3 ubiquitin-protein ligase HUWE1 (EC 6.3.2.-) (HECT, UBA and WWE domain-containing protein 1) (URE-B1) (Upstream regulatory element- binding protein 1) (Fragment). [Source:UniProtKB/Swiss-Prot;Acc:P51593] [ENSRNOT00000004064]	A_42_P574960	0.0180354	down	1.16633	Rn.12130
Sart3	squamous cell carcinoma antigen recognized by T-cells 3	Rattus norvegicus squamous cell carcinoma antigen recognized by T-cells 3 (Sart3), mRNA [NM_001107156]	A_44_P278770	0.0494443	down	1.20754	Rn.101480
			A_44_P609110	0.0431026	down	1.90368
			A_44_P550867	0.035324	up	1.19917
Tp53bp1	tumor protein p53 binding protein 1	Rattus norvegicus tumor protein p53 binding protein 1 (Tp53bp1), mRNA [NM_001106501]	A_44_P276782	0.018737	down	1.16315	Rn.160605
		AW527233 UI-R-BO1-ajs-a-05-0-UI.s1 UI-R-BO1 Rattus norvegicus cDNA clone UI-R-BO1-ajs-a-05-0-UI 3', mRNA sequence [AW527233]	A_44_P477437	0.0460322	up	1.30246	Rn.147067
Man1c1	mannosidase, alpha, class 1C, member 1"		A_44_P455038	0.0209017	down	1.25749	chr5:153332648-153325875
		Rattus norvegicus similar to hypothetical protein 4930509O22 (LOC366221), mRNA [XM_345452]	A_44_P365905	0.0201469	down	1.55917
Atxn2l	ataxin 2-like	Rattus norvegicus ataxin 2-like (Atxn2l), mRNA [NM_001130097]	A_44_P1036268	0.0468672	down	1.13716	Rn.220440
		MUSCNCG cGMP-gated cation channel protein {Mus musculus} (exp=-1; wgp=0; cg=0), partial (3%) [TC630256]	A_43_P10036	0.00139079	up	1.07112
Rpl13a	ribosomal protein L13A	Rattus norvegicus ribosomal protein L13A (Rpl13a), mRNA [NM_173340]	A_42_P834588	0.0105869	down	1.23503	Rn.92211
			A_44_P185199	0.00253816	down	1.39929
Usp27x	ubiquitin specific peptidase 27, X-linked"		A_44_P255678	0.0330976	down	1.29532	chrX:27199650-27199709
		BF544349 UI-R-BT0-pt-g-07-0-UI.r1 UI-R-BT0 Rattus norvegicus cDNA clone UI-R-BT0-pt-g-07-0-UI 5', mRNA sequence [BF544349]	A_44_P368945	0.0280944	up	1.38926	Rn.23179
Farsb	phenylalanyl-tRNA synthetase, beta subunit"		A_42_P722409	0.0315394	up	1.15575	chr9:77843708-77843649
		BI279561 UI-R-DE0-cae-a-02-0-UI.s1 UI-R-DE0 Rattus norvegicus cDNA clone UI-R-DE0-cae-a-02-0-UI 3', mRNA sequence [BI279561]	A_44_P364660	0.0374084	up	1.27663	Rn.219226
Prox2	prospero homeobox 2	PREDICTED: Rattus norvegicus similar to Homeobox prospero-like protein PROX1 (PROX 1) (predicted) (RGD1310315_predicted), mRNA [XM_001057168]	A_44_P213380	0.0436847	up	1.55018
		BG057538 nag14b10.x1 NCI_CGAP_Emb2 Rattus norvegicus cDNA clone IMAGE:4175971 3' similar to TR:Q92922 Q92922 SWI/SNF COMPLEX 155 KDA SUBUNIT. ;, mRNA sequence [BG057538]	A_44_P270391	0.0100033	down	1.14543	Rn.94211
LOC691984	similar to Glypican-6 precursor	Rattus norvegicus similar to Gpc6 protein (LOC306163), mRNA [XM_224516]	A_44_P166112	0.0447429	down	1.35549
Klf9	Kruppel-like factor 9	Rattus norvegicus Kruppel-like factor 9 (Klf9), mRNA [NM_057211]	A_44_P322590	0.0344931	down	1.30953	Rn.19481
Csrp2bp	CSRP2 binding protein	PREDICTED: Rattus norvegicus cysteine and glycine-rich protein 2 binding protein (predicted) (Csrp2bp_predicted), mRNA [XM_342530]	A_44_P171035	0.0339921	down	1.08062	Rn.36418
LOC685444	hypothetical protein LOC685444	Rattus norvegicus hypothetical protein LOC685444 (LOC685444), mRNA [NM_001130581]	A_44_P1006749	0.00664583	up	1.08631	Rn.72811
			A_44_P776383	0.0423837	up	1.14627
		AI176550 EST220137 Normalized rat ovary, Bento Soares Rattus sp. cDNA clone ROVBT67 3' end, mRNA sequence [AI176550]	A_44_P240621	0.00377388	up	1.63544	Rn.3119
		BE117594 UI-R-BS1-ayk-f-07-0-UI.s1 UI-R-BS1 Rattus norvegicus cDNA clone UI-R-BS1-ayk-f-07-0-UI 3', mRNA sequence [BE117594]	A_44_P274898	0.0226918	up	1.38816	Rn.25493
RGD1309079	similar to Ab2-095	Rattus norvegicus Ab2-095 mRNA, complete cds. [AY325189]	A_44_P144379	0.0496836	down	1.2801	Rn.202839
		BF396482 UI-R-BS2-bdy-f-09-0-UI.s1 UI-R-BS2 Rattus norvegicus cDNA clone UI-R-BS2-bdy-f-09-0-UI 3', mRNA sequence [BF396482]	A_44_P104087	0.0113894	down	1.12028	Rn.160277
Tert	telomerase reverse transcriptase	Rattus norvegicus telomerase reverse transcriptase (Tert), mRNA [NM_053423]	A_44_P139889	0.031551	up	1.27054	Rn.48802
Mll4	myeloid/lymphoid or mixed-lineage leukemia 4	PREDICTED: Rattus norvegicus similar to Trithorax homolog 2 (Mixed lineage leukemia gene homolog 2 protein) (predicted) (RGD1308331_predicted), mRNA [XR_009278]	A_44_P112061	0.0209268	down	1.23037	Rn.57787
Gabrb1	gamma-aminobutyric acid (GABA) A receptor, beta 1"		A_44_P360501	0.0177516	up	1.17565	chr14:38530492-38530433
		BF286219 EST450810 Rat Gene Index, normalized rat, Rattus norvegicus cDNA Rattus norvegicus cDNA clone RGIFN35 5' sequence, mRNA sequence [BF286219]	A_44_P849035	0.0266947	down	1.42259	Rn.34130
		Q8H1Y9_AEGTA (Q8H1Y9) Starch synthase II, partial (3%) [TC626050]	A_44_P135728	0.0239207	up	1.14146
		AW142860 EST293114 Normalized rat brain, Bento Soares Rattus sp. cDNA clone RGIAX12 5' end, mRNA sequence [AW142860]	A_44_P307993	0.0463401	down	1.43121	Rn.15539
		BF559198 UI-R-A1-ec-b-02-0-UI.r1 UI-R-A1 Rattus norvegicus cDNA clone UI-R-A1-ec-b-02-0-UI 5', mRNA sequence [BF559198]	A_42_P750029	0.00986554	up	1.17913	Rn.50843
Secisbp2	SECIS binding protein 2	Rattus norvegicus SECIS binding protein 2 (Secisbp2), mRNA [NM_024002]	A_44_P252093	0.0378802	up	1.15027	Rn.25076
Olr1237	olfactory receptor 1237	Rattus norvegicus olfactory receptor 1237 (Olr1237), mRNA [NM_001000963]	A_44_P404906	0.0288685	down	1.57301	Rn.143533
Rfxap	regulatory factor X-associated protein	Rattus norvegicus regulatory factor X-associated protein (Rfxap), mRNA [NM_001044263]	A_44_P944294	0.0458535	down	1.31391	Rn.198587
		AA925638 UI-R-A1-em-d-03-0-UI.s1 UI-R-A1 Rattus norvegicus cDNA clone UI-R-A1-em-d-03-0-UI 3', mRNA sequence [AA925638]	A_44_P112687	0.0471306	up	1.40571
Mstn	myostatin	Rattus norvegicus myostatin (Mstn), mRNA [NM_019151]	A_43_P11952	0.00856817	up	1.44673	Rn.44460
Ptma	prothymosin alpha	Rattus norvegicus prothymosin alpha (Ptma), mRNA [NM_021740]	A_42_P486763	0.0196545	down	1.1465	Rn.817
Dpp3l	dipeptidylpeptidase 3-like	Rattus norvegicus similar to folate receptor 3 (LOC367022), mRNA [XM_345898]	A_44_P382484	0.0105706	down	1.36934
Ccdc54	coiled-coil domain containing 54	PREDICTED: Rattus norvegicus similar to testes development-related NYD-SP17 (predicted) (RGD1559779_predicted), mRNA [XM_001063933]	A_44_P836794	0.0397051	down	1.21256	Rn.131207
			A_44_P701086	0.00655226	down	1.21138
		AA956446 UI-R-E1-fj-h-11-0-UI.s1 UI-R-E1 Rattus norvegicus cDNA clone UI-R-E1-fj-h-11-0-UI 3' similar to gi [AA956446]	A_44_P373592	0.00193122	up	1.27412	Rn.23354
Nid1	nidogen 1	Rat entactin mRNA, 3'end. [M15797]	A_44_P210385	0.00682747	down	1.18359	Rn.105658
Acbd5	acyl-Coenzyme A binding domain containing 5	Rattus norvegicus acyl-Coenzyme A binding domain containing 5 (Acbd5), mRNA [NM_001077635]	A_44_P546204	0.0261878	up	1.34951	Rn.139288
Actr1b	ARP1 actin-related protein 1 homolog B (yeast)	Rattus norvegicus ARP1 actin-related protein 1 homolog B (yeast) (Actr1b), mRNA [NM_001039028]	A_44_P412916	0.0179039	down	1.28776	Rn.24317
Nlgn2	neuroligin 2	Rattus norvegicus neuroligin 2 (Nlgn2), mRNA [NM_053992]	A_43_P13011	0.0474431	down	1.11293	Rn.55111
		Shultzomica03546 Rat lung airway and parenchyma cDNA libraries Rattus norvegicus cDNA clone Contig3135 5', mRNA sequence [CF110295]	A_44_P666038	0.0478676	up	1.30822	Rn.7792
RGD1305627	hypothetical LOC314467	Rattus norvegicus cDNA clone IMAGE:9033955 [BC158708]	A_44_P487788	0.0332233	up	1.15094	Rn.22347
Xkr8	XK, Kell blood group complex subunit-related family, member 8"		A_44_P295458	0.04329	down	1.04578	chr5:152421670-152421729
LOC289471	similar to DNA helicase HEL308	PREDICTED: Rattus norvegicus similar to DNA helicase HEL308 (LOC289471), mRNA [XM_214002]	A_44_P286024	0.000166917	down	1.28299	Rn.64464
Grin2b	glutamate receptor, ionotropic, N-methyl D-aspartate 2B"		A_44_P308696	0.0495332	up	1.21472	chr4:172722668-172722609
			A_44_P194351	0.0254771	down	1.67626
		FM050764 etcmhea Rattus norvegicus cDNA clone etcmheaP0006O03 5', mRNA sequence [FM050764]	A_43_P19826	0.0145429	down	1.26611	Rn.216902
Commd7	COMM domain containing 7	Rattus norvegicus COMM domain containing 7 (Commd7), mRNA [NM_001030029]	A_43_P17772	0.0258564	up	1.15656	Rn.92689
		AI237079 EST233641 Normalized rat ovary, Bento Soares Rattus sp. cDNA clone ROVDO44 3' end, mRNA sequence [AI237079]	A_42_P592306	0.016468	up	1.19104	Rn.15945
		AA818433 UI-R-A0-au-g-11-0-UI.s1 UI-R-A0 Rattus norvegicus cDNA clone UI-R-A0-au-g-11-0-UI 3', mRNA sequence [AA818433]	A_44_P518794	0.00780367	up	1.2452
		Q26268_APLCA (Q26268) Calreticulin, partial (5%) [TC589542]	A_44_P914582	0.0472822	down	1.43773
			A_44_P870465	0.0222376	up	1.83639
Eif4g2	eukaryotic translation initiation factor 4, gamma 2"		A_44_P594455	0.0288081	down	1.18166	chr1:168833582-168833523
Ryk	receptor-like tyrosine kinase	Rattus norvegicus receptor-like tyrosine kinase (Ryk), mRNA [NM_080402]	A_44_P301799	0.0246111	down	1.11362	Rn.11796
LOC689147	hypothetical protein LOC689147	PREDICTED: Rattus norvegicus hypothetical protein LOC689147 (LOC689147), mRNA [XM_001069739]	A_44_P146606	0.00298608	up	1.54279	Rn.118853
Tnks1bp1	tankyrase 1 binding protein 1	PREDICTED: Rattus norvegicus tankyrase 1 binding protein 1 (predicted) (Tnks1bp1_predicted), mRNA [XM_215763]	A_44_P215530	0.00240656	up	1.2702	Rn.139703
		AI639202 rx03140s Rat mixed-tissue library Rattus norvegicus cDNA clone rx03140 3', mRNA sequence [AI639202]	A_44_P848706	0.011858	down	1.20819
		BQ210985 UI-R-DY1-coj-o-01-0-UI.s1 NCI_CGAP_DY1 Rattus norvegicus cDNA clone IMAGE:7336251 3', mRNA sequence [BQ210985]	A_44_P490337	0.0201079	down	1.39881	Rn.93101
Slc29a2	solute carrier family 29 (nucleoside transporters), member 2"		A_43_P12657	0.000397741	down	1.2651	chr1:207647120-207647980
		AA859172 UI-R-A0-bn-d-12-0-UI.s2 UI-R-A0 Rattus norvegicus cDNA clone UI-R-A0-bn-d-12-0-UI 3' similar to gb [AA859172]	A_44_P160280	0.027348	down	1.16001	Rn.27882
Tigd4	tigger transposable element derived 4	PREDICTED: Rattus norvegicus tigger transposable element derived 4 (predicted) (Tigd4_predicted), mRNA [XM_001072194]	A_44_P173224	0.0343518	up	1.01681
Olr1122	olfactory receptor 1122	Rattus norvegicus olfactory receptor 1122 (Olr1122), mRNA [NM_001000882]	A_44_P517671	0.0167561	down	1.60319	Rn.143612
Zfpm2	zinc finger protein, multitype 2"		A_43_P17941	0.0212274	down	1.12628	chr7:76435321-76501658
Nme2	non-metastatic cells 2, protein (NM23B) expressed in"		A_44_P1040567	0.00584013	down	1.25726	chr10:82582889-82582830
Clec16a	C-type lectin domain family 16, member A"		A_44_P867129	0.0170721	down	1.29142	chr10:4871462-4871403
Scap	SREBF chaperone	Rattus norvegicus SREBF chaperone (Scap), mRNA [NM_001100966]	A_44_P396460	0.0185277	down	1.20295	Rn.99548
Slc18a1	solute carrier family 18 (vesicular monoamine), member 1"		A_44_P175057	0.042021	down	1.15156	chr16:22389669-22389728
		AW144037 EST294333 Normalized rat embryo, Bento Soares Rattus sp. cDNA clone RGICF85 5' end, mRNA sequence [AW144037]	A_44_P604635	0.0467453	down	1.28089	Rn.1761
Tmem146	transmembrane protein 146	Rattus norvegicus transmembrane protein 146 (Tmem146), mRNA [NM_001134984]	A_44_P760721	0.00937145	down	1.37559	Rn.121285
		Cdig2 protein (Fragment). [Source:UniProtKB/TrEMBL;Acc:Q642F9] [ENSRNOT00000016167]	A_44_P1005988	0.0410136	up	1.17804
Mug2	murinoglobulin 2	Rattus norvegicus murinoglobulin 2 (Mug2), mRNA [NM_001002826]	A_44_P153947	0.0103736	down	1.38485	Rn.198690
		BG672591 DRNCLH08 Rat DRG Library Rattus norvegicus cDNA clone DRNCLH08 5', mRNA sequence [BG672591]	A_44_P234815	0.0162114	up	1.24331	Rn.32103
Nrbp2	nuclear receptor binding protein 2	Rattus norvegicus nuclear receptor binding protein 2 (Nrbp2), mRNA [NM_001135007]	A_44_P250983	0.0481906	down	1.23666	Rn.198238
Rbmx	RNA binding motif protein, X-linked"		A_44_P246146	0.0312091	down	1.17184	chrX:142117682-142117623
		Shultzomica03641 Rat lung airway and parenchyma cDNA libraries Rattus norvegicus cDNA clone Contig3221 5', mRNA sequence [CF110390]	A_43_P18268	0.0202981	down	1.19431	Rn.16368
		AGENCOURT_28542556 NIH_MGC_248 Rattus norvegicus cDNA clone IMAGE:7374588 5', mRNA sequence [CO575464]	A_44_P658594	0.024168	down	1.11714	Rn.13909
Mtch1	mitochondrial carrier homolog 1 (C. elegans)	Rattus norvegicus mitochondrial carrier homolog 1 (C. elegans) (Mtch1), nuclear gene encoding mitochondrial protein, mRNA [NM_001100833]	A_42_P547945	0.0304718	down	1.27053	Rn.98516
Supv3l1	suppressor of var1, 3-like 1 (S. cerevisiae)"		A_42_P457895	0.0391395	down	1.05904	chr20:29684522-29684463
Pcaf	p300/CBP-associated factor	Rattus norvegicus p300/CBP-associated factor (Pcaf), mRNA [NM_001024252]	A_44_P241604	0.0448813	down	1.19714	Rn.4126
Gramd2	GRAM domain containing 2	PREDICTED: Rattus norvegicus similar to HCV NS3-transactivated protein 2 (predicted) (RGD1564007_predicted), mRNA [XM_217153]	A_44_P466757	0.0305454	up	1.30609	Rn.72431
Atp5l	ATP synthase, H+ transporting, mitochondrial F0 complex, subunit G"		A_44_P271541	0.000580253	up	1.28726	chr8:47870137-47870078
		AI227704 EST224399 Normalized rat brain, Bento Soares Rattus sp. cDNA clone RBRCK44 3' end, mRNA sequence [AI227704]	A_44_P957585	0.032104	down	1.11374	Rn.90161
		PRDM2_RAT (Q63755) PR domain zinc finger protein 2 (PR domain-containing protein 2) (Retinoblastoma protein-interacting zinc-finger protein) (Zinc finger protein RIZ), partial (6%) [TC628052]	A_44_P868828	0.0496345	down	1.16127
Wdr5b	WD repeat domain 5B	Rattus norvegicus WD repeat domain 5B (Wdr5b), mRNA [NM_001024766]	A_44_P592022	0.00937965	up	1.04911	Rn.162060
		AW535419 UI-R-BS0-aof-a-01-0-UI.s1 UI-R-BS0 Rattus norvegicus cDNA clone UI-R-BS0-aof-a-01-0-UI 3', mRNA sequence [AW535419]	A_44_P443657	0.0253304	up	1.59237	Rn.199201
Chd1l	chromodomain helicase DNA binding protein 1-like	Rattus norvegicus chromodomain helicase DNA binding protein 1-like (Chd1l), mRNA [NM_001107704]	A_42_P561835	0.0134419	down	1.12077	Rn.1478
Rnf146	ring finger protein 146	Rattus norvegicus ring finger protein 146 (Rnf146), mRNA [NM_001012060]	A_44_P365598	0.016633	up	1.10506	Rn.16849
Pop5	processing of precursor 5, ribonuclease P/MRP subunit (S. cerevisiae)"		A_44_P1027904	0.00946375	down	1.07043	chr12:42645623-42645396
Csrp2bp	CSRP2 binding protein	PREDICTED: Rattus norvegicus cysteine and glycine-rich protein 2 binding protein (predicted) (Csrp2bp_predicted), mRNA [XM_342530]	A_44_P988511	0.0247435	down	1.1812	Rn.36418
		BI274583 UI-R-CW0-bwl-e-09-0-UI.s1 UI-R-CW0 Rattus norvegicus cDNA clone UI-R-CW0-bwl-e-09-0-UI 3', mRNA sequence [BI274583]	A_44_P303271	0.0115665	up	1.34282	Rn.13531
Ino80b	INO80 complex subunit B	Rattus norvegicus INO80 complex subunit B (Ino80b), mRNA [NM_001048233]	A_44_P1023611	0.0387827	down	1.11942	Rn.106816
			A_44_P590984	0.0272521	up	1.07039
		BG372973 UI-R-CV1-bsb-a-11-0-UI.s1 UI-R-CV1 Rattus norvegicus cDNA clone UI-R-CV1-bsb-a-11-0-UI 3', mRNA sequence [BG372973]	A_44_P549949	0.0494139	down	1.56827	Rn.36362
Acsm3	acyl-CoA synthetase medium-chain family member 3	Rattus norvegicus acyl-CoA synthetase medium-chain family member 3 (Acsm3), mRNA [NM_033231]	A_43_P15937	0.033143	up	1.84982	Rn.88644
		UI-R-E1-fp-c-12-0-UI.s1 UI-R-E1 Rattus norvegicus cDNA clone UI-R-E1-fp-c-12-0-UI 3', mRNA sequence [AA957174]	A_44_P481022	0.0335941	up	1.22131	Rn.136878
MGC95208	similar to 4930453N24Rik protein	Rattus norvegicus similar to 4930453N24Rik protein (MGC95208), mRNA [NM_001005552]	A_43_P23197	0.0305644	up	1.12055	Rn.19101
		AMGNNUC:URRG1-00158-G5-A urrg1 (14046) Rattus norvegicus cDNA clone urrg1-00158-g5 5', mRNA sequence [CB616116]	A_44_P547762	0.0025395	up	1.29833	Rn.23892
Ptgds	prostaglandin D2 synthase (brain)	Rattus norvegicus prostaglandin D2 synthase (brain) (Ptgds), mRNA [NM_013015]	A_43_P15529	0.000500235	down	1.07073	Rn.11400
		BI290548 UI-R-DK0-cgd-e-08-0-UI.s1 UI-R-DK0 Rattus norvegicus cDNA clone UI-R-DK0-cgd-e-08-0-UI 3', mRNA sequence [BI290548]	A_44_P365142	0.0483106	up	1.20607	Rn.8175
LOC498940	similar to Carboxylesterase 2	Rattus norvegicus similar to Carboxylesterase 2 (LOC498940), mRNA [NM_001044258]	A_44_P605947	0.0212014	down	1.72898	Rn.126854
Tm7sf4	transmembrane 7 superfamily member 4	PREDICTED: Rattus norvegicus transmembrane 7 superfamily member 4 (predicted) (Tm7sf4_predicted), mRNA [XM_001062083]	A_44_P253393	0.0184466	up	2.554
Olr982	olfactory receptor 982	Rattus norvegicus olfactory receptor 982 (Olr982), mRNA [NM_001000702]	A_44_P458909	0.0219052	down	1.05998	Rn.143373
Sephs1	selenophosphate synthetase 1	Rattus norvegicus selenophosphate synthetase 1 (Sephs1), mRNA [NM_001104630]	A_44_P1035807	0.0151126	down	1.0884	Rn.100803
		AGENCOURT_112388554 NIH_MGC_429 Rattus norvegicus cDNA clone IMAGE:9030235 5', mRNA sequence [EV775563]	A_43_P18051	0.013371	down	1.49228	Rn.216578
RGD1561273	similar to spermatogenesis associated glutamate (E)-rich protein 4b	PREDICTED: Rattus norvegicus similar to spermatogenesis associated glutamate (E)-rich protein 4b (LOC681204), mRNA [XM_001060741]	A_44_P506614	0.0452185	up	1.28757	Rn.111004
		AW921297 EST352601 Rat gene index, normalized rat, norvegicus, Bento Soares Rattus norvegicus cDNA clone RGIHQ68 5' end, mRNA sequence [AW921297]	A_44_P694719	0.0223342	up	1.29762
		UI-R-BO1-aiy-b-10-0-UI.s1 UI-R-BO1 Rattus norvegicus cDNA clone UI-R-BO1-aiy-b-10-0-UI 3', mRNA sequence [AW526005]	A_44_P338191	0.0424472	down	1.29858	Rn.8987
Entpd7	ectonucleoside triphosphate diphosphohydrolase 7	Rattus norvegicus similar to LALP1 (LOC309390), mRNA [XM_239062]	A_44_P342320	0.0184602	down	1.26441
		UI-R-BO1-aja-e-03-0-UI.s1 UI-R-BO1 Rattus norvegicus cDNA clone UI-R-BO1-aja-e-03-0-UI 3', mRNA sequence [AW526305]	A_44_P204484	0.0277243	up	1.79206	Rn.46159
Tmc4	transmembrane channel-like 4	Rattus norvegicus transmembrane channel-like 4 (Tmc4), mRNA [NM_001034104]	A_44_P1020780	0.0335312	down	1.2269	Rn.138375
		AA925266 UI-R-A1-ee-f-06-0-UI.s1 UI-R-A1 Rattus norvegicus cDNA clone UI-R-A1-ee-f-06-0-UI 3', mRNA sequence [AA925266]	A_44_P485670	0.0315921	up	1.52536
Dnah9	dynein, axonemal, heavy polypeptide 9"		A_43_P16013	0.0495592	down	1.699	chr10:52174167-52174226
Ttf2	transcription termination factor, RNA polymerase II"		A_44_P393829	0.00880209	down	1.16904	chr2:195988558-195988499
Hdac5	histone deacetylase 5	Hdac5 protein (Fragment). [Source:UniProtKB/TrEMBL;Acc:Q5RJZ2] [ENSRNOT00000028381]	A_44_P339659	0.00993956	down	2.67576	Rn.79863
Trpm1	transient receptor potential cation channel, subfamily M, member 1"		A_44_P102746	0.0179162	up	1.31301	chr1:118700409-118700468
Pank1	pantothenate kinase 1	Rattus norvegicus pantothenate kinase 1 (Pank1), mRNA [NM_001106373]	A_43_P18824	0.0185312	down	1.36422	Rn.6581
Pnkp	polynucleotide kinase 3'-phosphatase	Rattus norvegicus polynucleotide kinase 3'-phosphatase (Pnkp), mRNA [NM_001004259]	A_43_P22480	0.0334047	down	1.09404	Rn.45061
		AA924304 UI-R-A1-dy-f-11-0-UI.s1 UI-R-A1 Rattus norvegicus cDNA clone UI-R-A1-dy-f-11-0-UI 3', mRNA sequence [AA924304]	A_44_P101073	0.0427824	down	1.5692
Smyd5	SET and MYND domain containing 5	Rattus norvegicus SET and MYND domain containing 5 (Smyd5), mRNA [NM_001107870]	A_43_P21033	0.0414857	down	1.21748	Rn.3127
Wfdc2	WAP four-disulfide core domain 2	Rattus norvegicus WAP four-disulfide core domain 2 (Wfdc2), mRNA [NM_173109]	A_42_P603980	0.0226477	up	1.13174	Rn.14640
Cox5b	cytochrome c oxidase subunit Vb	Rattus norvegicus cytochrome c oxidase subunit Vb (Cox5b), mRNA [NM_053586]	A_43_P12860	0.0476793	up	1.22333	Rn.6686
RGD1307890	similar to C1orf25	Rattus norvegicus similar to C1orf25 (RGD1307890), mRNA [NM_001037192]	A_44_P213963	0.0407904	down	1.33404	Rn.16683
Taf1c	TATA box binding protein (Tbp)-associated factor, RNA polymerase I, C"		A_44_P419659	0.00671891	down	1.3347	chr19:49846873-49846814
		BF410227 UI-R-CA1-bjv-a-05-0-UI.s1 UI-R-CA1 Rattus norvegicus cDNA clone UI-R-CA1-bjv-a-05-0-UI 3', mRNA sequence [BF410227]	A_44_P455501	0.0472283	down	1.11332	Rn.41
Ptk2b	PTK2B protein tyrosine kinase 2 beta	Rattus norvegicus PTK2B protein tyrosine kinase 2 beta (Ptk2b), mRNA [NM_017318]	A_44_P482346	0.0452139	up	1.11387	Rn.11025
RGD1310012	similar to NAG-5 protein	PREDICTED: Rattus norvegicus similar to NAG-5 protein (predicted) (RGD1310012_predicted), mRNA [XM_233376]	A_44_P100790	0.00192462	down	2.20135	Rn.207363
Ccbe1	collagen and calcium binding EGF domains 1	PREDICTED: Rattus norvegicus collagen and calcium binding EGF domains 1 (predicted) (Ccbe1_predicted), mRNA [XM_341624]	A_44_P315397	0.0251666	down	1.1032	Rn.199045
Mrgprg	MAS-related GPR, member G"		A_43_P20453	0.0350324	down	1.25059	chr1:204154297-204154238
Tbx3	T-box 3	Rattus norvegicus T-box 3 (Tbx3), mRNA [NM_181638]	A_44_P222030	0.0404367	down	1.12394	Rn.162144
Ncoa3	nuclear receptor coactivator 3	Nuclear receptor coactivator 3 (EC 2.3.1.48) (NCoA-3) (Amplified in breast cancer-1 protein homolog) (AIB-1) (Fragment). [Source:UniProtKB/Swiss-Prot;Acc:Q9EPU2] [ENSRNOT00000044234]	A_44_P501242	0.0290394	down	1.22039	Rn.20691
Espl1	extra spindle poles like 1 (S. cerevisiae)	PREDICTED: Rattus norvegicus extra spindle poles like 1 (S. cerevisiae) (predicted) (Espl1_predicted), mRNA [XM_235691]	A_44_P265366	0.0183444	down	1.1939	Rn.135286
			A_44_P243345	0.0338317	up	2.16228
		RAB2A_RAT (P05712) Ras-related protein Rab-2A, partial (17%) [TC588281]	A_44_P899064	0.0193013	down	1.15142
RGD1559588	similar to cell surface receptor FDFACT	PREDICTED: Rattus norvegicus similar to cell surface receptor FDFACT (predicted) (RGD1559588_predicted), mRNA [XM_221990]	A_44_P114282	0.0477813	down	1.28798
		Rattus norvegicus hypothetical LOC306577 (LOC306577), mRNA [XM_224972]	A_44_P309319	0.0234395	up	1.38059
		Rattus norvegicus similar to IgG1/kappa antibody (LOC366773), mRNA [XM_345760]	A_44_P555778	0.0303343	up	1.43541
Fjx1	four jointed box 1 (Drosophila)	Rattus norvegicus four jointed box 1 (Drosophila) (Fjx1), mRNA [NM_001108955]	A_44_P205376	0.0173534	down	1.26292	Rn.93503
		Rattus norvegicus similar to G2 (LOC366143), mRNA [XM_345410]	A_44_P499268	0.0275343	up	1.19686
		Rattus norvegicus similar to U6 snRNA-associated Sm-like protein LSm6 (Sm protein F) (LOC364988), mRNA [XM_344754]	A_44_P105396	0.00390076	up	1.2533
RGD1359290	Ribosomal_L22 domain containing protein RGD1359290	Rattus norvegicus Ribosomal_L22 domain containing protein RGD1359290 (RGD1359290), mRNA [NM_001047898]	A_44_P201016	0.0156467	down	1.60676	Rn.110865
Impad1	inositol monophosphatase domain containing 1	Rattus norvegicus Ac2-190 mRNA, complete cds. [AY321340]	A_44_P139851	0.0230862	down	1.16745	Rn.129949
		AI555132 UI-R-C2p-qt-b-05-0-UI.s1 UI-R-C2p Rattus norvegicus cDNA clone UI-R-C2p-qt-b-05-0-UI 3', mRNA sequence [AI555132]	A_44_P233053	0.0149077	up	1.18839	Rn.25154
LOC689914	similar to C05G5.5	PREDICTED: Rattus norvegicus similar to C05G5.5 (LOC684165), mRNA [XM_001069225]	A_44_P232100	0.0181318	up	1.19529
Slc5a12	solute carrier family 5 (sodium/glucose cotransporter), member 12"		A_44_P112304	0.0110684	up	2.03006	chr3:96087170-96089799
		AA925799 UI-R-A1-et-g-02-0-UI.s1 UI-R-A1 Rattus norvegicus cDNA clone UI-R-A1-et-g-02-0-UI 3' similar to gi [AA925799]	A_44_P771770	0.00439783	down	1.19345	Rn.164217
Sil1	SIL1 homolog, endoplasmic reticulum chaperone (S. cerevisiae)"		A_42_P641082	0.000452569	down	1.16437	chr18:27871436-27864147
Erh	enhancer of rudimentary homolog (Drosophila)	Rattus norvegicus enhancer of rudimentary homolog (Drosophila) (Erh), mRNA [NM_001109442]	A_44_P279229	0.049632	up	1.21154	Rn.7881
Irs2	insulin receptor substrate 2	RNU89743 Rattus norvegicus unknown protein mRNA, partial cds [U89743]	A_44_P242493	0.0316666	down	1.17423	Rn.10718
LOC367357	hypothetical LOC367357	PREDICTED: Rattus norvegicus similar to Y-linked testis-specific protein (LOC367357), mRNA [XR_009469]	A_44_P290976	0.0407345	up	1.34321	Rn.195671
		BA000019 translation initiation factor IF-3 {Nostoc sp. PCC 7120} (exp=-1; wgp=0; cg=1), partial (5%) [TC628280]	A_44_P654586	0.0127771	up	1.28241
Cip29	cytokine induced protein 29 kDa	Rattus norvegicus cytokine induced protein 29 kDa (Cip29), mRNA [NM_001033070]	A_44_P354335	0.0476398	up	1.06853	Rn.1506
		PREDICTED: Rattus norvegicus similar to DIP13 alpha (predicted) (RGD1309388_predicted), mRNA [XR_007603]	A_44_P973707	0.0131381	up	1.35175	Rn.34413
			A_44_P904800	0.0154338	up	1.75953
		Rattus norvegicus similar to 60S RIBOSOMAL PROTEIN L29 (P23) (LOC298973), mRNA [XM_213066]	A_44_P483013	0.0320334	up	1.36686
Suclg1	succinate-CoA ligase, alpha subunit"		A_44_P399999	0.028005	up	1.16494	chr4:106601409-106601468
		CB544587 AMGNNUC:SRPB2-00077-C2-A srpb2 (10220) Rattus norvegicus cDNA clone srpb2-00077-c2 5', mRNA sequence [CB544587]	A_44_P335502	0.0459663	up	1.18491	Rn.161009
Hint1	histidine triad nucleotide binding protein 1	Rattus norvegicus histidine triad nucleotide binding protein 1 (Hint1), mRNA [NM_001109607]	A_42_P769180	0.0448736	up	1.21601	Rn.138667
Dnpep	aspartyl aminopeptidase	Rattus norvegicus aspartyl aminopeptidase (Dnpep), mRNA [NM_001024879]	A_42_P641323	0.0102587	down	1.14644	Rn.65448
		AI137961 UI-R-C0-hn-a-01-0-UI.s1 UI-R-C0 Rattus norvegicus cDNA clone UI-R-C0-hn-a-01-0-UI 3', mRNA sequence [AI137961]	A_44_P242422	0.0319941	up	1.26181	Rn.103683
Mrgpre	MAS-related GPR, member E"		A_43_P11401	0.000980107	up	1.26532	chr1:204171738-204171679
Lrrc50	leucine rich repeat containing 50	Rattus norvegicus leucine rich repeat containing 50 (Lrrc50), mRNA [NM_001014154]	A_44_P380060	0.00567704	down	1.14629	Rn.160929
Tnfrsf8	tumor necrosis factor receptor superfamily, member 8"		A_43_P11943	0.0409173	down	1.46472	chr5:163717026-163716967
		PREDICTED: Rattus norvegicus similar to N-acetyltransferase ESCO2 (Establishment of cohesion 1 homolog 2) (ECO1 homolog 2) (LOC683635), mRNA [XM_001066826]	A_44_P837344	0.0262813	up	1.18388	Rn.145486
Ctdspl	CTD (carboxy-terminal domain, RNA polymerase II, polypeptide A) small phosphatase-like"		A_44_P807408	0.0321918	up	1.4464	chr8:123991280-123991799
Aldoal1	aldolase A-like 1	Rattus norvegicus aldolase A-like 1 (Aldoal1), mRNA [NM_001013943]	A_44_P480801	0.0437981	down	1.16493	Rn.122663
			A_44_P706821	0.0183629	up	1.36817
Rpl7a	ribosomal protein L7a	Rattus norvegicus ribosomal protein L7a (Rpl7a), mRNA [NM_001114391]	A_44_P231817	0.0128741	down	1.44422	Rn.144857
Dmrta1	DMRT-like family A1	Rattus norvegicus DMRT-like family A1 (Dmrta1), mRNA [NM_001107945]	A_44_P121813	0.00732953	up	1.17869	Rn.43064
		BI276352 UI-R-CW0-bwp-b-09-0-UI.s1 UI-R-CW0 Rattus norvegicus cDNA clone UI-R-CW0-bwp-b-09-0-UI 3', mRNA sequence [BI276352]	A_44_P307463	0.0360103	up	1.1921	Rn.15416
Wwox	WW domain-containing oxidoreductase	Rattus norvegicus WW domain-containing oxidoreductase (Wwox), mRNA [NM_001106188]	A_44_P513546	0.0444795	up	1.11758	Rn.158117
		Rattus norvegicus similar to putative pheromone receptor (Go-VN5) (LOC304209), mRNA [XM_221803]	A_44_P297326	0.0156047	up	1.1993
Zbtb8os	zinc finger and BTB domain containing 8 opposite strand	Shultzomica03434 Rat lung airway and parenchyma cDNA libraries Rattus norvegicus cDNA clone Contig3032 5', mRNA sequence [CF110183]	A_42_P708952	0.0360433	up	1.18088	Rn.144416
Casp8	caspase 8	Rattus norvegicus caspase 8 (Casp8), mRNA [NM_022277]	A_44_P298210	0.049054	down	1.18774	Rn.54474
Wipi2	WD repeat domain, phosphoinositide interacting 2"		A_43_P21855	0.0307513	down	1.17473	chr12:12314376-12313969
Dhx9	DEAH (Asp-Glu-Ala-His) box polypeptide 9	Rattus norvegicus DEAH (Asp-Glu-Ala-His) box polypeptide 9 (Dhx9), mRNA [NM_001107184]	A_44_P142352	0.0472085	down	1.19367	Rn.107359
			A_44_P419777	0.0193357	down	1.65661
Olr679	olfactory receptor 679	Rattus norvegicus olfactory receptor 679 (Olr679), mRNA [NM_001000354]	A_44_P536232	0.0415915	down	1.48318	Rn.142824
Clcn4-2	chloride channel 4-2	Rattus norvegicus chloride channel 4-2 (Clcn4-2), mRNA [NM_022198]	A_44_P313445	0.0334032	down	1.41246	Rn.44406
		AA849810 EST192577 Normalized rat muscle, Bento Soares Rattus sp. cDNA clone RMUAJ22 3' end, mRNA sequence [AA849810]	A_44_P226388	0.0147871	down	3.73448	Rn.96104
Htr3a	5-hydroxytryptamine (serotonin) receptor 3a	Rattus norvegicus 5-hydroxytryptamine (serotonin) receptor 3a (Htr3a), mRNA [NM_024394]	A_44_P540908	0.0282157	down	1.313	Rn.55109
Pfkfb3	6-phosphofructo-2-kinase/fructose-2,6-biphosphatase 3"		A_44_P158880	0.0287379	up	1.16403	chr17:78258273-78258332
		BF284521 EST449112 Rat Gene Index, normalized rat, Rattus norvegicus cDNA Rattus norvegicus cDNA clone RGIER56 3' sequence, mRNA sequence [BF284521]	A_44_P190466	0.0271917	up	1.24725	Rn.141040
Pip4k2a	phosphatidylinositol-5-phosphate 4-kinase, type II, alpha"		A_44_P181548	0.000118498	up	1.04163	chr17:92950916-92950857
LOC366396	similar to ribosomal protein S12	PREDICTED: Rattus norvegicus similar to ribosomal protein S12 (LOC366396), mRNA [XR_006819]	A_44_P398631	0.0280909	up	1.23688	Rn.197573
LOC501038	Ab2-060	Rattus norvegicus Ab2-060 (LOC501038), mRNA [NM_001047965]	A_44_P132805	0.0302528	down	1.3005	Rn.202905
Usp5	ubiquitin specific peptidase 5 (isopeptidase T)	Rattus norvegicus ubiquitin specific peptidase 5 (isopeptidase T) (Usp5), mRNA [NM_001106619]	A_44_P466608	0.00292587	down	1.46803	Rn.44078
Olr1139	olfactory receptor 1139	Rattus norvegicus olfactory receptor 1139 (Olr1139), mRNA [NM_001000427]	A_44_P547939	0.0340461	down	1.23708	Rn.143601
		AI112163 UI-R-Y0-ml-d-10-0-UI.s1 UI-R-Y0 Rattus norvegicus cDNA clone UI-R-Y0-ml-d-10-0-UI 3', mRNA sequence [AI112163]	A_44_P357822	0.0471106	up	1.13339	Rn.23583
			A_44_P639137	0.00983153	down	1.1006
Col16a1	collagen, type XVI, alpha 1"		A_43_P16491	0.0307671	down	1.24655	chr5:149126166-149126225
Pias2	protein inhibitor of activated STAT 2	Rattus norvegicus protein inhibitor of activated STAT 2 (Pias2), mRNA [NM_053337]	A_44_P377245	0.0209082	down	1.14606	Rn.25546
Flcn	folliculin	Rattus norvegicus folliculin (Flcn), mRNA [NM_199390]	A_44_P344077	0.0317831	down	1.07272	Rn.12799
Caprin1	cell cycle associated protein 1	Rattus norvegicus cell cycle associated protein 1 (Caprin1), mRNA [NM_001012185]	A_44_P1027438	0.042991	down	1.16526	Rn.22572
		Putative uncharacterized protein (Fragment). [Source:UniProtKB/TrEMBL;Acc:A2VCX0] [ENSRNOT00000043825]	A_44_P537843	0.0438928	down	1.17155	Rn.155858
LOC500354	similar to C030030A07Rik protein	Rattus norvegicus similar to C030030A07Rik protein (LOC500354), mRNA [NM_001037797]	A_44_P636936	0.0108818	up	1.52596	Rn.140900
Ranbp17	RAN binding protein 17	Rattus norvegicus RAN binding protein 17 (Ranbp17), mRNA [NM_001106994]	A_43_P20636	0.00792361	down	1.70962	Rn.101744
Eapa2	experimental autoimmune prostatitis antigen 2	Rattus norvegicus experimental autoimmune prostatitis antigen 2 (Eapa2), mRNA [NM_001009534]	A_44_P137517	0.0379217	down	1.53615	Rn.108070
Clic6	chloride intracellular channel 6	Rattus norvegicus chloride intracellular channel 6 (Clic6), mRNA [NM_176078]	A_44_P449623	0.0425319	down	1.07527	Rn.214050
		AI575648 UI-R-Y0-vi-e-11-0-UI.s1 UI-R-Y0 Rattus norvegicus cDNA clone UI-R-Y0-vi-e-11-0-UI 3', mRNA sequence [AI575648]	A_44_P106053	0.0205242	up	1.22147	Rn.6459
Abhd13	abhydrolase domain containing 13	Rattus norvegicus abhydrolase domain containing 13 (Abhd13), mRNA [NM_001107327]	A_44_P342412	0.00946912	down	1.11189	Rn.6621
Ret	ret proto-oncogene	Rattus norvegicus ret proto-oncogene (Ret), transcript variant 1, mRNA [NM_012643]	A_44_P480153	0.0190636	up	1.25886	Rn.93200
Crygc	crystallin, gamma C"		A_42_P612109	0.0433855	up	1.18471	chr9:63720922-63720863
		GB	A_44_P491883	0.0131327	down	1.36581
Zbtb41	zinc finger and BTB domain containing 41	Rattus norvegicus similar to FRBZ1 (LOC289052), mRNA [XM_222679]	A_44_P182658	0.0239736	up	1.10067	Rn.51461
		BF558775 UI-R-A1-dt-b-12-0-UI.r1 UI-R-A1 Rattus norvegicus cDNA clone UI-R-A1-dt-b-12-0-UI 5', mRNA sequence [BF558775]	A_42_P659432	0.0273602	down	1.37283
		Q62D02_BURMA (Q62D02) CheC family protein, partial (7%) [TC602451]	A_44_P748589	0.00549951	down	1.11851
Maf1	MAF1 homolog (S. cerevisiae)	Rattus norvegicus MAF1 homolog (S. cerevisiae) (Maf1), mRNA [NM_001014085]	A_44_P127740	0.0406894	down	1.18667	Rn.1113
Clcn2	chloride channel 2	Rattus norvegicus chloride channel 2 (Clcn2), mRNA [NM_017137]	A_43_P11833	0.0382841	down	1.0704	Rn.11073
		BF523098 UI-R-C2p-rr-d-03-0-UI.r1 UI-R-C2p Rattus norvegicus cDNA clone UI-R-C2p-rr-d-03-0-UI 5', mRNA sequence [BF523098]	A_44_P549858	0.0215938	down	1.07634	Rn.12890
RGD1562546	similar to trophinin isoform 1	PREDICTED: Rattus norvegicus similar to trophinin isoform 1 (predicted) (RGD1562546_predicted), mRNA [XM_344729]	A_44_P309423	0.010649	down	1.10898	Rn.126660
		BF417335 UI-R-CN0-bld-a-03-0-UI.s1 UI-R-CN0 Rattus norvegicus cDNA clone UI-R-CN0-bld-a-03-0-UI 3', mRNA sequence [BF417335]	A_44_P905734	0.00513236	up	2.0215	Rn.47244
Tpt1	tumor protein, translationally-controlled 1"		A_44_P165855	0.0466998	down	1.23783	chr15:56754267-56754326
Ryr1	ryanodine receptor 1, skeletal muscle"		A_42_P632374	0.0417765	down	1.14859	chr1:84118452-84118393
		AI010279 EST204730 Normalized rat lung, Bento Soares Rattus sp. cDNA clone RLUBW36 3' end, mRNA sequence [AI010279]	A_44_P228548	0.00031015	down	1.26474	Rn.4018
Clcf1	cardiotrophin-like cytokine factor 1	Rattus norvegicus cardiotrophin-like cytokine factor 1 (Clcf1), mRNA [NM_207615]	A_44_P233702	0.0477083	down	1.2503	Rn.130193
			A_44_P262583	0.0305164	down	1.45229
		CB547064 AMGNNUC:URRG1-00030-D10-A1 urrg1 (14046) Rattus norvegicus cDNA clone urrg1-00030-d10, mRNA sequence [CB547064]	A_43_P13780	0.0123267	up	1.7914	Rn.9619
		FAR18C12.R Rat retinal ganglion cell Rattus norvegicus cDNA, mRNA sequence [CF979235]	A_44_P862708	0.00820973	up	1.22064	Rn.200990
Rexo1	REX1, RNA exonuclease 1 homolog (S. cerevisiae)"		A_44_P333329	0.0381697	down	1.25679	chr7:10682432-10682491
Tmem43	transmembrane protein 43	Rattus norvegicus transmembrane protein 43 (Tmem43), mRNA [NM_001007745]	A_44_P234362	0.0226266	down	1.29645	Rn.15201
Pdgfrb	platelet derived growth factor receptor, beta polypeptide"		A_42_P546968	0.0491672	up	1.19722	chr18:57053405-57053463
		PREDICTED: Rattus norvegicus similar to RIKEN cDNA 5730434I03 gene (predicted) (RGD1561589_predicted), mRNA [XM_223330]	A_44_P208415	0.0393987	down	1.07963	Rn.110195
RGD1565629	similar to collagen and calcium binding EGF domains 1	PREDICTED: Rattus norvegicus similar to collagen and calcium binding EGF domains 1 (predicted) (RGD1565629_predicted), mRNA [XM_225862]	A_44_P222616	0.00497057	up	1.3552	Rn.91552
Stxbp1	syntaxin binding protein 1	Rattus norvegicus syntaxin binding protein 1 (Stxbp1), mRNA [NM_013038]	A_44_P472942	0.046948	down	1.06139	Rn.80843
		FM143057 etnokid Rattus norvegicus cDNA clone etnokidP0070E23 5', mRNA sequence [FM143057]	A_44_P824143	0.0273149	up	1.26416	Rn.54842
		RIKEN cDNA 1700007I08 gene Gene [Source:MGI Symbol;Acc:MGI:1917612] [ENSRNOT00000055335]	A_44_P790924	0.023891	down	1.22515
RGD1304822	similar to KIAA1627 protein	Rattus norvegicus similar to KIAA1627 protein (RGD1304822), mRNA [NM_001106470]	A_44_P137930	0.000651017	down	1.16041	Rn.40840
RGD1562266	similar to Hmgb1 protein	PREDICTED: Rattus norvegicus similar to High mobility group protein 1 (HMG-1) (predicted) (RGD1563668_predicted), mRNA [XM_573095]	A_44_P389664	0.0437963	up	1.08096
		UI-R-FS0-cqs-o-01-0-UI.s1 UI-R-FS0 Rattus norvegicus cDNA clone UI-R-FS0-cqs-o-01-0-UI 3', mRNA sequence [CA509677]	A_44_P285305	0.0279965	down	1.43525	Rn.156589
		AB026259 AB026259 Rattus norvegicus pituitary Sprague-Dawley adult Rattus norvegicus cDNA, mRNA sequence [AB026259]	A_44_P834734	0.0428495	up	1.30779	Rn.204739
Olr1621	olfactory receptor 1621	Rattus norvegicus similar to olfactory receptor GA_x6K02T2PMLR-6361495-6362481 (LOC290020), mRNA [XM_223986]	A_44_P445489	0.025761	down	2.28272
Zc3h7b	zinc finger CCCH-type containing 7B	Rattus norvegicus zinc finger CCCH-type containing 7B (Zc3h7b), mRNA [NM_001130695]	A_44_P102061	0.0460406	down	1.12327	Rn.91605
Urb1	URB1 ribosome biogenesis 1 homolog (S. cerevisiae)	PREDICTED: Rattus norvegicus similar to Hypothetical protein KIAA0539 (predicted) (RGD1304621_predicted), mRNA [XM_221669]	A_44_P187830	0.0382786	down	1.20754	Rn.95642
			A_44_P607953	0.0219919	down	1.13622
		UI-R-C2p-rj-c-10-0-UI.r1 UI-R-C2p Rattus norvegicus cDNA clone UI-R-C2p-rj-c-10-0-UI 5', mRNA sequence [BF546305]	A_44_P624391	0.0407621	down	1.25981	Rn.168192
		CB545562 AMGNNUC:CR3-00008-B10-A Colon rat 3 (10415) Rattus norvegicus cDNA clone cr3-00008-b10 5', mRNA sequence [CB545562]	A_43_P20216	0.0394248	down	1.25389	Rn.114492
		AI172475 EST218487 Normalized rat muscle, Bento Soares Rattus sp. cDNA clone RMUCA32 3' end, mRNA sequence [AI172475]	A_44_P491578	0.00609297	up	1.16765	Rn.1279
Mfsd8	major facilitator superfamily domain containing 8	Rattus norvegicus major facilitator superfamily domain containing 8 (Mfsd8), mRNA [NM_001047910]	A_44_P557338	0.0203162	up	1.44645	Rn.214942
Wdr34	WD repeat domain 34	Rattus norvegicus WD repeat domain 34 (Wdr34), mRNA [NM_001005542]	A_44_P433739	0.0209688	down	1.15459	Rn.116904
		PREDICTED: Rattus norvegicus kinesin family member 26A (predicted) (Kif26a_predicted), mRNA [XM_234565]	A_44_P258168	0.00122805	up	1.15006	Rn.214070
Impact	imprinted and ancient	Rattus norvegicus imprinted and ancient (Impact), mRNA [NM_001012235]	A_43_P16775	0.0469809	down	1.13226	Rn.190651
F9	coagulation factor IX	PREDICTED: Rattus norvegicus coagulation factor IX (F9), mRNA [XM_346365]	A_44_P430922	0.0164974	down	1.17646	Rn.214249
		BQ204243 UI-R-DN1-cmv-d-06-0-UI.s1 UI-R-DN1 Rattus norvegicus cDNA clone UI-R-DN1-cmv-d-06-0-UI 3', mRNA sequence [BQ204243]	A_44_P322273	0.0303334	up	1.1469	Rn.162454
Rap2ip	Rap2 interacting protein	Rattus norvegicus Rap2 interacting protein (Rap2ip), mRNA [NM_198758]	A_44_P229196	0.0422854	down	1.59229	Rn.102473
		Rattus norvegicus similar to dachshund homolog isoform a (LOC361081), mRNA [XM_341364]	A_44_P196754	0.0305757	down	1.39644
Ndufs5	NADH dehydrogenase (ubiquinone) Fe-S protein 5	Rattus norvegicus NADH dehydrogenase (ubiquinone) Fe-S protein 5 (Ndufs5), mRNA [NM_001030052]	A_44_P1043979	0.0109676	up	1.32685	Rn.156413
Adad1	adenosine deaminase domain containing 1 (testis specific)	Rattus norvegicus adenosine deaminase domain containing 1 (testis specific) (Adad1), mRNA [NM_001006977]	A_44_P215444	0.0344643	up	1.18838	Rn.162573
		Rattus norvegicus similar to trypsin (EC 3.4.21.4) II precursor - rat (LOC362349), mRNA [XM_342671]	A_44_P229626	0.0221693	up	1.38262
Prosc	proline synthetase co-transcribed homolog (bacterial)	Rattus norvegicus proline synthetase co-transcribed homolog (bacterial) (Prosc), mRNA [NM_001107320]	A_44_P511049	0.0253736	down	1.11619	Rn.1880
		AA956778 UI-R-E1-fr-g-01-0-UI.s1 UI-R-E1 Rattus norvegicus cDNA clone UI-R-E1-fr-g-01-0-UI 3' similar to gi [AA956778]	A_44_P312918	0.0210934	down	2.11313	Rn.950
		Rattus norvegicus similar to putative protein family member (XC177) (LOC291825), mRNA [XM_226214]	A_44_P520572	0.0145872	up	1.45631
		AMGNNUC:NRDG1-00191-D8-A nrdg1 (10855) Rattus norvegicus cDNA clone nrdg1-00191-d8 5', mRNA sequence [CB545779]	A_43_P10170	0.00622174	down	1.07352	Rn.200866
Mfi2	antigen p97 (melanoma associated) identified by monoclonal antibodies 133.2 and 96.5	Rattus norvegicus antigen p97 (melanoma associated) identified by monoclonal antibodies 133.2 and 96.5 (Mfi2), mRNA [NM_001105872]	A_43_P20099	0.0224855	down	1.69244	Rn.85934
Tex19.2	testis expressed gene 19.2	Rattus norvegicus testis expressed gene 19.2 (Tex19.2), mRNA [NM_001109622]	A_43_P18806	0.0178395	down	1.27856	Rn.29352
Jak1	Janus kinase 1	Rattus norvegicus Janus kinase 1 (Jak1), mRNA [NM_053466]	A_43_P15781	0.0475445	down	1.1333	Rn.90191
H2-M3	histocompatibility 2, M region locus 3"		A_43_P12333	0.0441331	down	1.20361	chr20:1412731-1412672
Cyp2c23	cytochrome P450, family 2, subfamily c, polypeptide 23"		A_43_P12701	0.0172988	down	1.2346	chr1:249220039-249220098
			A_44_P976212	0.0203151	down	1.22543
		AI716150 UI-R-Y0-abd-b-01-0-UI.s1 UI-R-Y0 Rattus norvegicus cDNA clone UI-R-Y0-abd-b-01-0-UI 3', mRNA sequence [AI716150]	A_44_P387623	0.00476856	up	1.26286	Rn.19800
Heatr5a	HEAT repeat containing 5A	Rattus norvegicus similar to CG2747-PA (LOC362737), mRNA [XM_343061]	A_44_P244197	0.026777	up	1.80853	Rn.7269
			A_44_P657248	0.0236725	down	1.81596
Cpn1	carboxypeptidase N, polypeptide 1"		A_44_P269384	0.0160017	up	1.04943	chr1:249257195-249257254
Serpina5	serine (or cysteine) peptidase inhibitor, clade A, member 5"		A_42_P759524	0.0146093	down	1.17987	chr6:128161177-128161236
Tmem67	transmembrane protein 67	Rattus norvegicus transmembrane protein 67 (Tmem67), mRNA [NM_001107916]	A_44_P126412	0.0181549	up	1.37598	Rn.72665
		Rattus norvegicus similar to ribosomal protein S18, cytosolic [validated] - rat (LOC365767), mRNA [XM_345200]	A_44_P175608	0.0223126	up	1.12363
Cep76	centrosomal protein 76kDa	Putative uncharacterized protein CSG11 (Fragment). [Source:UniProtKB/TrEMBL;Acc:Q33DY8] [ENSRNOT00000029431]	A_44_P548502	0.00623695	down	1.06123	Rn.98568
Rpl32	ribosomal protein L32	Rattus norvegicus ribosomal protein L32 (Rpl32), mRNA [NM_013226]	A_44_P487676	0.0276319	down	1.19792	Rn.110966
Cd46	CD46 molecule, complement regulatory protein"		A_43_P11967	0.0301306	up	1.55354	chr13:110996923-110995983
		UI-R-EP0-coc-k-15-0-UI.s1 UI-R-EP0 Rattus norvegicus cDNA clone UI-R-EP0-coc-k-15-0-UI 3', mRNA sequence [BQ208304]	A_44_P890548	0.0457366	up	1.1792	Rn.207411
			A_44_P151853	0.0281335	up	1.98218
		AMGNNUC:URRG1-00154-B4-A urrg1 (14046) Rattus norvegicus cDNA clone urrg1-00154-b4 5', mRNA sequence [CB609950]	A_44_P953481	0.0319666	up	1.12039	Rn.97185
Kprp	keratinocytes proline-rich protein	Rattus norvegicus keratinocytes proline-rich protein (Kprp), mRNA [NM_001002290]	A_44_P109385	0.00292564	up	1.20271	Rn.77803
LOC689075	similar to ribosomal protein L10	PREDICTED: Rattus norvegicus similar to ribosomal protein L10 (LOC689075), mRNA [XM_001069421]	A_44_P156705	0.043439	up	1.21315
Dclre1c	DNA cross-link repair 1C, PSO2 homolog (S. cerevisiae)"		A_42_P783205	0.0282164	down	1.15416	chr17:85896850-85896791
			A_44_P408197	0.049612	up	1.24324
		AI175486 EST219038 Normalized rat muscle, Bento Soares Rattus sp. cDNA clone RMUCO11 3' end, mRNA sequence [AI175486]	A_44_P484362	0.0279536	up	1.21735	Rn.201711
Mospd4	motile sperm domain containing 4	Rattus norvegicus motile sperm domain containing 4 (Mospd4), mRNA [NM_001108241]	A_44_P1017595	0.0443813	up	1.18711	Rn.63770
LOC691679	hypothetical protein LOC691679	PREDICTED: Rattus norvegicus hypothetical protein LOC691679 (LOC691679), mRNA [XM_001079245]	A_44_P424519	0.0133551	up	1.19567	Rn.140187
			A_43_P10503	0.0313918	up	1.79217
Cops3	COP9 constitutive photomorphogenic homolog subunit 3 (Arabidopsis)	Rattus norvegicus COP9 constitutive photomorphogenic homolog subunit 3 (Arabidopsis) (Cops3), mRNA [NM_001004200]	A_44_P992523	0.0180027	up	1.16979	Rn.3963
Olr905	olfactory receptor 905	Rattus norvegicus olfactory receptor 905 (Olr905), mRNA [NM_001001355]	A_44_P186979	0.0368231	down	1.33368	Rn.143395
Pdik1l	PDLIM1 interacting kinase 1 like	Rattus norvegicus PDLIM1 interacting kinase 1 like (Pdik1l), mRNA [NM_001107984]	A_44_P168800	0.0018897	down	1.35601	Rn.41405
		BF411408 UI-R-CN0-bmk-a-08-0-UI.s1 UI-R-CN0 Rattus norvegicus cDNA clone UI-R-CN0-bmk-a-08-0-UI 3', mRNA sequence [BF411408]	A_44_P663759	0.0126566	up	1.30226
Rbm11	RNA binding motif protein 11	Rattus norvegicus RNA binding motif protein 11 (Rbm11), mRNA [NM_001105898]	A_44_P375658	0.0470273	down	1.58654	Rn.154372
Kcnk3	potassium channel, subfamily K, member 3"		A_42_P671477	0.0188928	down	1.51256	chr6:25746907-25746848
Dock11	dedicator of cytokinesis 11	Dedicator of cytokinesis 11 (Fragment). [Source:UniProtKB/TrEMBL;Acc:Q2PS60] [ENSRNOT00000032275]	A_44_P361755	0.0293896	up	1.28529	Rn.22563
RGD1564575	RGD1564575	PREDICTED: Rattus norvegicus RGD1564575 (predicted) (RGD1564575_predicted), mRNA [XM_001075395]	A_44_P255854	0.0274642	down	1.74903
LOC299282	Serine protease inhibitor	Rattus norvegicus Serine protease inhibitor (LOC299282), mRNA [NM_182474]	A_44_P412140	0.0170422	up	1.07857	Rn.97597
Nrg3	neuregulin 3	PREDICTED: Rattus norvegicus similar to neuregulin-3 (predicted) (RGD1559678_predicted), mRNA [XM_573873]	A_44_P170926	0.0168162	down	2.01813	Rn.215016
Ift88	intraflagellar transport 88 homolog (Chlamydomonas)	Rattus norvegicus intraflagellar transport 88 homolog (Chlamydomonas) (Ift88), mRNA [NM_001107266]	A_44_P549198	0.0203745	down	1.19384	Rn.132110
		AW144052 EST294348 Normalized rat embryo, Bento Soares Rattus sp. cDNA clone RGICG16 5' end, mRNA sequence [AW144052]	A_44_P556881	0.0499648	up	1.58007	Rn.203785
Olr1362	olfactory receptor 1362	Rattus norvegicus olfactory receptor 1362 (Olr1362), mRNA [NM_001006598]	A_44_P170573	0.0477067	up	1.12875	Rn.113183
Fam70a	family with sequence similarity 70, member A"		A_43_P17003	0.0488289	up	1.1055	chrX:7139808-7151331
		BM385982 UI-R-DN1-ckg-k-22-0-UI.s1 UI-R-DN1 Rattus norvegicus cDNA clone UI-R-DN1-ckg-k-22-0-UI 3', mRNA sequence [BM385982]	A_44_P270411	0.00201636	down	1.11389	Rn.3954
Ptprn	protein tyrosine phosphatase, receptor type, N"		A_44_P458855	0.047679	down	1.15644	chr9:74528683-74528459
Wdr77	WD repeat domain 77	Rattus norvegicus WD repeat domain 77 (Wdr77), mRNA [NM_001008771]	A_44_P386515	0.0063278	down	1.31426	Rn.14128
Kifc3	kinesin family member C3	Rattus norvegicus kinesin family member C3 (Kifc3), mRNA [NM_001103352]	A_43_P15788	0.00540227	down	1.30158	Rn.14753
		AI029553 UI-R-C0-ix-a-10-0-UI.s1 UI-R-C0 Rattus norvegicus cDNA clone UI-R-C0-ix-a-10-0-UI 3', mRNA sequence [AI029553]	A_44_P423176	0.0455168	up	1.54066	Rn.7882
Arrdc4	arrestin domain containing 4	Rattus norvegicus arrestin domain containing 4 (Arrdc4), mRNA [NM_001047853]	A_44_P466033	0.0138867	down	1.12262	Rn.137053
		Myosin heavy chain (Fragment). [Source:UniProtKB/TrEMBL;Acc:Q9Z2B7] [ENSRNOT00000004009]	A_44_P332674	0.0175079	down	1.15731	Rn.205062
		AA858471 UI-R-E0-bo-a-02-0-UI.s1 UI-R-E0 Rattus norvegicus cDNA clone UI-R-E0-bo-a-02-0-UI 3' similar to gb [AA858471]	A_44_P329239	0.0348277	down	1.10274	Rn.2743
Pvrl3	poliovirus receptor-related 3	Rattus norvegicus poliovirus receptor-related 3 (Pvrl3), mRNA [NM_001105883]	A_44_P509144	0.0196119	up	1.09342	Rn.56373
		Q3V2X2_MOUSE (Q3V2X2) Adult male hippocampus cDNA, RIKEN full-length enriched library, clone:C630031M24 product:KIDINS220 homolog (Fragment), partial (3%) [TC597865]	A_44_P653264	0.0152212	up	1.34583
		general transcription factor II I repeat domain-containing 1 [Source:RefSeq_peptide;Acc:NP_001001504] [ENSRNOT00000002014]	A_43_P15782	0.0285169	down	1.20659	Rn.84872
		Rattus norvegicus similar to thyroid hormone receptor interactor 3; thyroid receptor interacting protein 3; zinc finger, HIT domain containing 3 (LOC360586), mRNA [XM_340867]	A_44_P492624	0.000332276	down	1.31191
		Rattus norvegicus similar to RIKEN cDNA 4921537P18 (LOC364620), mRNA [XM_344532]	A_44_P468693	0.00778019	down	1.09092
Sf3b1	splicing factor 3b, subunit 1"		A_43_P18423	0.027888	down	1.1815	chr9:53806897-53806757
Unc5d	unc-5 homolog D (C. elegans)	Rattus norvegicus similar to netrin receptor Unc5h4 (LOC306534), mRNA [XM_240446]	A_43_P22805	0.022489	up	1.33256
Sqstm1	sequestosome 1	Rattus norvegicus sequestosome 1 (Sqstm1), transcript variant 1, mRNA [NM_175843]	A_44_P367550	0.0454223	down	1.23706	Rn.107103
Asf1a	ASF1 anti-silencing function 1 homolog A (S. cerevisiae)	Rattus norvegicus ASF1 anti-silencing function 1 homolog A (S. cerevisiae) (Asf1a), mRNA [NM_001106389]	A_44_P503999	0.0401567	up	1.14975	Rn.163427
Lin52	lin-52 homolog (C. elegans)	PREDICTED: Rattus norvegicus similar to CG15929-PA (predicted) (RGD1306798_predicted), mRNA [XM_343089]	A_44_P124176	0.00586377	up	1.01704	Rn.213978
		UI-R-C0-hc-h-12-0-UI.s1 UI-R-C0 Rattus norvegicus cDNA clone UI-R-C0-hc-h-12-0-UI 3', mRNA sequence [AA965157]	A_44_P1021246	0.0110094	up	3.57283	Rn.146819
			A_44_P932288	0.0142009	up	1.20567
		Rattus norvegicus similar to NNP-1 (LOC309674), mRNA [XM_228077]	A_44_P356561	0.00673919	up	1.27092
Cyp2j10	cytochrome P450, family 2, subfamily j, polypeptide 10"		A_44_P448154	0.0357453	up	1.32734	chr5:116494846-116494787
Fam5c	family with sequence similarity 5, member C"		A_44_P472801	0.016233	up	1.12328	chr13:61023996-61024055
		UI-R-BT1-aqg-c-10-0-UI.s1 UI-R-BT1 Rattus norvegicus cDNA clone UI-R-BT1-aqg-c-10-0-UI 3', mRNA sequence [BE101634]	A_44_P646348	0.0283947	down	3.65475	Rn.113977
Prr5	proline rich 5 (renal)	Rattus norvegicus proline rich 5 (renal) (Prr5), mRNA [NM_001012121]	A_44_P331097	0.00153361	down	1.59056	Rn.30314
Ube2q2l	ubiquitin-conjugating enzyme E2Q family member 2-like	Rattus norvegicus ubiquitin-conjugating enzyme E2Q family member 2-like (Ube2q2l), mRNA [NM_001135997]	A_44_P156966	0.0107448	down	1.27247	Rn.106891
		Q86PI6_CAEEL (Q86PI6) Nuclear receptor NHR-114, partial (5%) [TC619865]	A_44_P670133	0.0251056	up	1.08178
Kif13a	kinesin family member 13A	Rattus norvegicus kinesin family member 13A (Kif13a), mRNA [NM_001107462]	A_44_P119273	0.0199617	down	1.21161	Rn.41333
RGD1565000	similar to Myelin P2 protein	Rattus norvegicus similar to Myelin P2 protein (RGD1565000), mRNA [NM_001134614]	A_43_P19742	0.0493842	up	1.23722	Rn.23613
Slc36a1	solute carrier family 36 (proton/amino acid symporter), member 1"		A_43_P13113	0.0390415	down	1.23786	chr10:40631123-40632379
		Rattus norvegicus similar to cell surface protein (LOC292453), mRNA [XM_218048]	A_44_P332821	0.00985177	up	1.30826
Ubc	ubiquitin C	Rattus norvegicus ubiquitin C (Ubc), mRNA [NM_017314]	A_44_P109638	0.0250937	down	1.30123	Rn.3761
LOC685707	similar to neuron navigator 1	PREDICTED: Rattus norvegicus similar to neuron navigator 1 (LOC685707), mRNA [XR_006273]	A_44_P421764	0.00507029	down	1.13127	Rn.154566
Lsm1	LSM1 homolog, U6 small nuclear RNA associated (S. cerevisiae)"		A_44_P363505	0.00769476	up	1.22572	chr16:70657391-70653435
Frmd4b	FERM domain containing 4B	Nitzin (Fragment). [Source:UniProtKB/TrEMBL;Acc:Q9Z259] [ENSRNOT00000010717]	A_44_P543303	0.0373941	down	1.13947	Rn.41044
		AMGNNUC:URRG1-00056-E9-A urrg1 (14046) Rattus norvegicus cDNA clone urrg1-00056-e9 5', mRNA sequence [CB612593]	A_44_P361850	0.0141335	down	1.17456	Rn.199193
Pdk4	pyruvate dehydrogenase kinase, isozyme 4"		A_44_P231269	0.0324417	down	1.55473	chr4:30241038-30239150
Akap5	A kinase (PRKA) anchor protein 5	Rattus norvegicus A kinase (PRKA) anchor protein 5 (Akap5), mRNA [NM_133515]	A_44_P238424	0.0474595	up	1.15045	Rn.122003
Atn1	atrophin 1	Rattus norvegicus atrophin 1 (Atn1), mRNA [NM_017228]	A_42_P516561	0.0453407	down	1.24407	Rn.11305
		AMGNNUC:URRG1-00158-B8-A urrg1 (14046) Rattus norvegicus cDNA clone urrg1-00158-b8 5', mRNA sequence [CB557226]	A_44_P470114	0.00691731	down	2.18838	Rn.147811
Sfxn1	sideroflexin 1	Rattus norvegicus sideroflexin 1 (Sfxn1), mRNA [NM_001012213]	A_44_P320955	0.0364756	down	1.23383	Rn.115752
Gdnf	glial cell derived neurotrophic factor	Rattus norvegicus glial cell derived neurotrophic factor (Gdnf), mRNA [NM_019139]	A_44_P365470	0.0233697	up	1.06511	Rn.53970
		Rattus norvegicus similar to Glyceraldehyde 3-phosphate dehydrogenase (GAPDH) (38 kDa BFA-dependent ADP-ribosylation substrate) (BARS-38) (LOC364400), mRNA [XM_344418]	A_44_P149625	0.0490211	down	2.37238
			A_44_P822839	0.0335893	down	1.0775
Adcy3	adenylate cyclase 3	Rattus norvegicus adenylate cyclase 3 (Adcy3), mRNA [NM_130779]	A_44_P377278	0.00958613	down	1.15693	Rn.87800
Hsp90aa1	heat shock protein 90, alpha (cytosolic), class A member 1"		A_44_P299870	0.0103134	up	1.16888	chr6:135415456-135415397
Olr1718	olfactory receptor 1718	Rattus norvegicus olfactory receptor 1718 (Olr1718), mRNA [NM_214460]	A_44_P505752	0.0270291	up	1.41746	Rn.142672
RGD1565566	similar to 60S ribosomal protein L18a	PREDICTED: Rattus norvegicus similar to 60S ribosomal protein L18a (predicted) (RGD1565566_predicted), mRNA [XM_574336]	A_44_P636337	0.0234313	down	1.13522	Rn.129447
Tmco1	transmembrane and coiled-coil domains 1	Rattus norvegicus transmembrane and coiled-coil domains 1 (Tmco1), mRNA [NM_001009631]	A_44_P306568	0.0402492	up	1.06901	Rn.89308
Tex15	testis expressed 15	Rattus norvegicus testis expressed 15 (Tex15), mRNA [NM_001106087]	A_44_P1000842	0.00674515	up	1.3386	Rn.46623
		AI407001 EST235289 Normalized rat ovary, Bento Soares Rattus sp. cDNA clone ROVDV13 3' end, mRNA sequence [AI407001]	A_44_P467524	0.0437177	down	1.23787	Rn.10641
Cryzl1	crystallin, zeta (quinone reductase)-like 1"		A_44_P448693	0.0100739	up	1.11232	chr11:31667536-31666532
			A_44_P944071	0.0433868	up	1.23971
		Dystrophin (Fragment). [Source:UniProtKB/Swiss-Prot;Acc:P11530] [ENSRNOT00000035692]	A_44_P342632	0.016639	down	1.41907
Rbm8	RNA binding motif protein 8	RNA-binding motif protein 8 (Fragment). [Source:UniProtKB/TrEMBL;Acc:Q27W01] [ENSRNOT00000028807]	A_42_P685418	0.0328136	up	1.17161	Rn.37716
		AW143859 EST294155 Normalized rat embryo, Bento Soares Rattus sp. cDNA clone RGICB74 5' end, mRNA sequence [AW143859]	A_44_P894544	0.0007735	up	1.21954
Olr1177	olfactory receptor 1177	Rattus norvegicus olfactory receptor 1177 (Olr1177), mRNA [NM_001000865]	A_44_P163301	0.0354069	up	2.19018	Rn.143578
RGD1562139	similar to 60S ribosomal protein L29 (P23)	PREDICTED: Rattus norvegicus similar to 60S ribosomal protein L29 (P23) (predicted) (RGD1562139_predicted), mRNA [XM_235395]	A_44_P368365	0.0195814	up	1.29378
		CB547241 AMGNNUC:URRG1-00066-H10-A urrg1 (14046) Rattus norvegicus cDNA clone urrg1-00066-h10 5', mRNA sequence [CB547241]	A_44_P462188	0.0353933	down	5.43981	Rn.6215
Slc26a11	solute carrier family 26, member 11"		A_44_P427078	0.0218927	down	1.57255	chr10:108740962-108741229
		UI-R-DY1-cnr-m-19-0-UI.s1 UI-R-DY1 Rattus norvegicus cDNA clone UI-R-DY1-cnr-m-19-0-UI 3', mRNA sequence [BQ207879]	A_44_P450595	0.00734629	down	1.28807	Rn.168068
Rpl7a	ribosomal protein L7a		A_44_P318616	0.0138406	down	1.39512
RGD1310868	similar to RIKEN cDNA D230014K01	Rattus norvegicus similar to RIKEN cDNA D230014K01 (RGD1310868), mRNA [NM_001107070]	A_44_P777576	0.0408654	down	1.12032	Rn.22928
			A_44_P372627	0.0140046	up	1.17004
Lass1	LAG1 homolog, ceramide synthase 1"		A_44_P262645	0.00617359	down	1.11066	chr16:19588808-19588749
LOC689582	similar to jumonji domain containing 2D	Rattus norvegicus similar to jumonji domain containing 2D (LOC689582), mRNA [NM_001079712]	A_44_P269984	0.0176594	down	1.05177	Rn.202733
Olr122	olfactory receptor 122	Rattus norvegicus olfactory receptor 122 (Olr122), mRNA [NM_001000156]	A_44_P229021	0.016725	down	1.51449	Rn.157204
Tbx18	T-box18	Rattus norvegicus T-box18 (Tbx18), mRNA [NM_001108173]	A_44_P445895	0.0242617	down	1.18998	Rn.161921
		UI-R-C1-ke-f-09-0-UI.s1 UI-R-C1 Rattus norvegicus cDNA clone UI-R-C1-ke-f-09-0-UI 3', mRNA sequence [AI045001]	A_44_P396665	0.017552	up	1.32417	Rn.155726
		UI-R-C0-jh-d-04-0-UI.r2 UI-R-C0 Rattus norvegicus cDNA clone UI-R-C0-jh-d-04-0-UI 5', mRNA sequence [BF551016]	A_44_P931596	0.0124193	down	1.1788	Rn.18478
Usp42	ubiquitin specific peptidase 42	Rattus norvegicus ubiquitin specific peptidase 42 (Usp42), mRNA [NM_001105909]	A_44_P380426	0.00512996	down	1.20977	Rn.25011
		AI137106 UI-R-C2p-oe-c-12-0-UI.s1 UI-R-C2p Rattus norvegicus cDNA clone UI-R-C2p-oe-c-12-0-UI 3', mRNA sequence [AI137106]	A_44_P198320	0.00891241	down	1.1588	Rn.15622
Cpn2	carboxypeptidase N, polypeptide 2"		A_44_P368461	0.0191225	down	1.20221	chr11:72392708-72392767
Sema5a	sema domain, seven thrombospondin repeats (type 1 and type 1-like), transmembrane domain (TM) and short cytoplasmic domain, (semaphorin) 5A"		A_44_P482859	0.0173858	down	1.41834	chr2:85135612-85135671
Gls	glutaminase	Rattus norvegicus glutaminase (Gls), nuclear gene encoding mitochondrial protein, transcript variant 1, mRNA [NM_012569]	A_44_P177827	0.0269316	down	1.2207	Rn.5762
Adnp	activity-dependent neuroprotector homeobox	Rattus norvegicus activity-dependent neuroprotector homeobox (Adnp), mRNA [NM_022681]	A_44_P634358	0.0147009	up	1.08033	Rn.48777
Myh3	myosin, heavy chain 3, skeletal muscle, embryonic"		A_44_P472954	0.0306066	down	1.06538	chr10:53799519-53799578
Zkscan5	zinc finger with KRAB and SCAN domains 5	Rattus norvegicus zinc finger with KRAB and SCAN domains 5 (Zkscan5), mRNA [NM_001107119]	A_44_P205928	0.00890095	down	1.1333	Rn.38399
Olr796	olfactory receptor 796	Rattus norvegicus olfactory receptor 796 (Olr796), mRNA [NM_001000600]	A_44_P168025	0.0297317	up	1.16925	Rn.142739
		PREDICTED: Rattus norvegicus similar to Spetex-2C protein (LOC678820), mRNA [XM_001053303]	A_44_P536867	0.0450076	up	1.67454
Baz1b	bromodomain adjacent to zinc finger domain, 1B"		A_42_P831092	0.00115936	down	1.31546	chr12:22600658-22600599
		AA924705 UI-R-A1-ea-d-03-0-UI.s1 UI-R-A1 Rattus norvegicus cDNA clone UI-R-A1-ea-d-03-0-UI 3' similar to gi [AA924705]	A_44_P194949	0.0483397	down	1.42383	Rn.32625
		UI-R-BO0-aib-b-06-0-UI.r1 UI-R-BO0 Rattus norvegicus cDNA clone UI-R-BO0-aib-b-06-0-UI 5', mRNA sequence [BF567493]	A_44_P876045	0.0188529	up	1.36921	Rn.87779
		Rattus norvegicus mRNA, Axomer-6, transported in axons [AB097856]	A_44_P501170	0.0302554	up	1.35007	Rn.131582
Olr181	olfactory receptor 181	Rattus norvegicus olfactory receptor 181 (Olr181), mRNA [NM_001001030]	A_44_P419034	0.00953015	down	1.22242	Rn.141826
Pop4	processing of precursor 4, ribonuclease P/MRP subunit (S. cerevisiae)"		A_42_P701840	0.0211356	up	1.20991	chr1:90749234-90749175
			A_44_P700820	0.0108084	down	1.20743
		Rattus norvegicus similar to immunoglobulin heavy chain variable region (LOC366751), mRNA [XM_345738]	A_44_P164027	0.0286605	up	1.30567
			A_44_P204048	0.0450128	down	1.21365
Igf2bp1	insulin-like growth factor 2 mRNA binding protein 1	Rattus norvegicus insulin-like growth factor 2 mRNA binding protein 1 (Igf2bp1), mRNA [NM_175594]	A_44_P550215	0.0432072	down	1.0854	Rn.77572
		Rattus norvegicus similar to ubiquitin (LOC367225), mRNA [XM_346023]	A_44_P530232	0.00314491	up	1.19329
Dhrs7	dehydrogenase/reductase (SDR family) member 7	Rattus norvegicus dehydrogenase/reductase (SDR family) member 7 (Dhrs7), mRNA [NM_001013098]	A_44_P684199	0.00806047	down	1.1215	Rn.119024
Olr131	olfactory receptor 131	Rattus norvegicus olfactory receptor 131 (Olr131), mRNA [NM_001001285]	A_44_P165629	0.0188082	down	2.2443	Rn.215178
		AA848859 EST191620 Normalized rat lung, Bento Soares Rattus sp. cDNA clone RLUAH26 3' end, mRNA sequence [AA848859]	A_44_P216831	0.0415377	down	1.23959	Rn.55926
Skint1	selection and upkeep of intraepithelial T cells 1	Rattus norvegicus similar to butyrophilin-like 2 (MHC class II associated) (LOC313485), mRNA [XM_233365]	A_44_P163987	0.0471046	up	1.27379
		BF389776 UI-R-BS2-bdo-f-04-0-UI.s1 UI-R-BS2 Rattus norvegicus cDNA clone UI-R-BS2-bdo-f-04-0-UI 3', mRNA sequence [BF389776]	A_44_P381574	0.00111695	down	1.08198	Rn.107838
RGD1560058	similar to prohibitin	Rattus norvegicus similar to PROHIBITIN (B-CELL RECEPTOR ASSOCIATED PROTEIN 32) (BAP 32) (LOC287559), mRNA [XM_220756]	A_44_P555903	0.0279512	up	1.42598
		Rattus norvegicus similar to olfactory receptor MOR114-1 (LOC366808), mRNA [XM_345782]	A_44_P293303	0.0195641	up	1.25905
		Rattus norvegicus similar to RIKEN cDNA 4933424N09 (LOC309037), mRNA [XM_219391]	A_43_P18395	0.0158236	down	1.10348	Rn.199722
Fbxw2	F-box and WD repeat domain containing 2	Rattus norvegicus F-box and WD repeat domain containing 2 (Fbxw2), mRNA [NM_001107835]	A_43_P18579	0.0309382	down	1.08919	Rn.103250
Ficd	FIC domain containing	Rattus norvegicus FIC domain containing (Ficd), mRNA [NM_001010946]	A_44_P525059	0.0249139	down	1.17174	Rn.162153
			A_44_P220385	0.00860678	up	4.90194
			A_44_P252958	0.0137578	up	1.33933
		E3 ubiquitin-protein ligase MIB2 (EC 6.3.2.-) (Mind bomb homolog 2) (RBSC-skeletrophin/dystrophin-like polypeptide). [Source:UniProtKB/Swiss-Prot;Acc:Q68LP1] [ENSRNOT00000023696]	A_44_P319169	0.0425177	down	1.17827	Rn.204283
LOC305052	hypothetical LOC305052	PREDICTED: Rattus norvegicus hypothetical LOC305052 (LOC305052), mRNA [XR_008366]	A_44_P482749	0.045882	up	1.24378	Rn.156182
			A_44_P763960	0.0478167	down	1.17406
Atpif1	ATPase inhibitory factor 1	Rattus norvegicus ATPase inhibitory factor 1 (Atpif1), nuclear gene encoding mitochondrial protein, mRNA [NM_012915]	A_44_P205572	0.0129198	up	1.1874	Rn.1658
		BF284519 EST449110 Rat Gene Index, normalized rat, Rattus norvegicus cDNA Rattus norvegicus cDNA clone RGIER54 3' sequence, mRNA sequence [BF284519]	A_44_P305256	0.0219355	up	1.45579	Rn.34609
			A_44_P959764	0.0497692	down	1.20426
		EST352149 Rat gene index, normalized rat, norvegicus, Bento Soares Rattus norvegicus cDNA clone RGIHD72 5' end, mRNA sequence [AW920845]	A_44_P988121	0.0263085	up	1.12972	Rn.145122
Olr1301	olfactory receptor 1301	Rattus norvegicus olfactory receptor 1301 (Olr1301), mRNA [NM_001000462]	A_44_P456626	0.0316025	up	1.56076	Rn.143493
Slc16a6	solute carrier family 16, member 6 (monocarboxylic acid transporter 7)"		A_43_P22757	0.00747765	down	1.17928	chr10:98872938-98872997
Tbx5	T-box 5	Rattus norvegicus T-box 5 (Tbx5), mRNA [NM_001009964]	A_44_P744401	0.015696	down	1.26894	Rn.6327
LOC299220	similar to GLE1-like, RNA export mediator isoform 1"		A_44_P459710	0.0381254	down	1.16169	chr6:111739091-111739150
RGD1561955	similar to diacylglycerol kinase eta	AMGNNUC:SRPB2-00235-D11-A srpb2 (10220) Rattus norvegicus cDNA clone srpb2-00235-d11 5', mRNA sequence [CB547277]	A_44_P243456	0.0219399	up	1.1752	Rn.200706
Ints2	integrator complex subunit 2	similar to RIKEN cDNA 2810417D08 (predicted) (RGD1305547_predicted), mRNA [Source:RefSeq_dna;Acc:NM_001100630] [ENSRNOT00000004876]	A_43_P20998	0.0187311	down	1.25083	Rn.219636
		MUSPURNU2P purine nucleoside phosphorylase {Mus musculus} (exp=-1; wgp=0; cg=0), partial (15%) [TC610847]	A_44_P704262	0.0369886	down	1.12588
Rps25	ribosomal protein s25	UI-R-FS0-cqo-a-09-0-UI.s1 UI-R-FS0 Rattus norvegicus cDNA clone UI-R-FS0-cqo-a-09-0-UI 3', mRNA sequence [CA508544]	A_44_P967625	0.00712659	up	1.2392	Rn.60855
Cartpt	CART prepropeptide	Rattus norvegicus CART prepropeptide (Cartpt), mRNA [NM_017110]	A_42_P636627	0.0371671	down	1.54625	Rn.89164
			A_44_P790941	0.0471267	up	2.14563
Man2a1	mannosidase, alpha, class 2A, member 1"		A_44_P522209	0.018822	down	1.28415	chr9:103520351-103520410
		GRB10 interacting GYF protein 2 Gene [Source:MGI Symbol;Acc:MGI:2138584] [ENSRNOT00000029749]	A_44_P485614	0.0455338	down	1.25669
			A_44_P170802	0.00691183	up	1.91546
		AMGNNUC:NRPI4-00035-F10-A W Rat pituitary (10472) Rattus norvegicus cDNA clone nrpi4-00035-f10 5', mRNA sequence [CB792153]	A_44_P422202	0.0068147	up	1.1784	Rn.162861
Fat1	FAT tumor suppressor homolog 1 (Drosophila)	Rattus norvegicus FAT tumor suppressor homolog 1 (Drosophila) (Fat1), mRNA [NM_031819]	A_42_P592144	0.0263975	up	1.16536	Rn.8633
Nfix	nuclear factor I/X (CCAAT-binding transcription factor)	Rattus norvegicus nuclear factor I/X (CCAAT-binding transcription factor) (Nfix), mRNA [NM_030866]	A_42_P721270	0.0193263	down	1.15347	Rn.56776
			A_44_P243701	0.0324075	down	1.25002	Rn.195709
Olr758	olfactory receptor 758	Rattus norvegicus olfactory receptor 758 (Olr758), mRNA [NM_001000369]	A_44_P515296	0.0419157	down	1.31136	Rn.142766
		Rattus norvegicus similar to 3-phosphoglycerate dehydrogenase (LOC290415), mRNA [XM_224421]	A_44_P480472	0.0127884	up	1.32528
Myl9	Myosin light chain 9	BI285476 UI-R-DD0-caa-f-02-0-UI.s1 UI-R-DD0 Rattus norvegicus cDNA clone UI-R-DD0-caa-f-02-0-UI 3', mRNA sequence [BI285476]	A_44_P181718	0.00790052	up	2.20326	Rn.6870
Wnt8b	wingless-type MMTV integration site family, member 8B"		A_44_P557726	0.00043183	down	1.15124	chr1:249560084-249560960
Npc1l1	NPC1 (Niemann-Pick disease, type C1, gene)-like 1"		A_44_P397836	0.0146872	up	1.87695
		PREDICTED: Rattus norvegicus similar to germinal center expressed transcript 2 (LOC685692), mRNA [XM_001064866]	A_44_P636514	0.0493504	down	1.35991
LOC683313	similar to keratin complex 2, basic, gene 6a"		A_43_P19969	0.00351978	up	1.65099
			A_44_P629801	0.0383759	up	1.24534
		BF550875 UI-R-C1-jy-d-12-0-UI.r1 UI-R-C1 Rattus norvegicus cDNA clone UI-R-C1-jy-d-12-0-UI 5', mRNA sequence [BF550875]	A_44_P154935	0.0398654	up	1.15206	Rn.92753
		BG668719 DRNBWC10 Rat DRG Library Rattus norvegicus cDNA clone DRNBWC10 5', mRNA sequence [BG668719]	A_43_P10893	0.024056	down	1.47541	Rn.48846
		Q4R9Q6_TETNG (Q4R9Q6) Chromosome undetermined SCAF25563, whole genome shotgun sequence. (Fragment), partial (13%) [TC590357]	A_44_P576610	0.0332114	up	1.2727
Snx26	sorting nexin 26	PREDICTED: Rattus norvegicus sorting nexin 26 (predicted) (Snx26_predicted), mRNA [XM_001079120]	A_44_P492041	0.0127736	up	1.12719	Rn.202237
RGD1311648	similar to hypothetical protein FLJ21820	Rattus norvegicus similar to hypothetical protein FLJ21820 (RGD1311648), mRNA [NM_001014075]	A_44_P433964	0.0231232	down	1.19219	Rn.105274
Cnnm3	cyclin M3	Rattus norvegicus cyclin M3 (Cnnm3), mRNA [NM_001106901]	A_44_P312318	0.0396973	down	1.24472	Rn.50710
Sub1	SUB1 homolog (S. cerevisiae)	Rattus norvegicus SUB1 homolog (S. cerevisiae) (Sub1), mRNA [NM_001009618]	A_44_P1026398	0.0183841	up	1.18081	Rn.8706
RGD1560543	similar to Afadin (AF-6 protein)	PREDICTED: Rattus norvegicus similar to Afadin (AF-6 protein) (predicted) (RGD1560543_predicted), mRNA [XM_574327]	A_44_P112030	0.00919432	down	1.33624	Rn.154892
Olr357	olfactory receptor 357	Rattus norvegicus olfactory receptor 357 (Olr357), mRNA [NM_001000257]	A_44_P334851	0.0413748	up	1.66244	Rn.141686
Dock5	dedicator of cytokinesis 5	Rattus norvegicus dedicator of cytokinesis 5 (Dock5), mRNA [NM_001107274]	A_44_P962846	0.0443039	down	1.25783	Rn.209596
			A_44_P389703	0.00325304	up	2.07823
Shf	Src homology 2 domain containing F	PREDICTED: Rattus norvegicus similar to Shb-like adapter protein, Shf - human (predicted) (RGD1562705_predicted), mRNA [XM_342507]	A_43_P19265	0.0227858	down	1.14673	Rn.205773
Nup133	nucleoporin 133	Rattus norvegicus cDNA clone IMAGE:7365240, containing frame-shift errors [BC091416]	A_42_P511015	0.0274358	down	1.11604	Rn.91990
LOC680273	similar to Forkhead box protein L1 (Forkhead-related protein FKHL11) (Forkhead-related transcription factor 7) (FREAC-7)	PREDICTED: Rattus norvegicus similar to Forkhead box protein L1 (Forkhead-related protein FKHL11) (Forkhead-related transcription factor 7) (FREAC-7) (LOC680273), mRNA [XM_001056413]	A_44_P375021	0.00113357	up	1.15397
Olr1295	olfactory receptor 1295	Rattus norvegicus olfactory receptor 1295 (Olr1295), mRNA [NM_001000598]	A_44_P369965	0.028434	up	1.41098	Rn.143495
		BG666773 DRABWC12 Rat DRG Library Rattus norvegicus cDNA clone DRABWC12 5', mRNA sequence [BG666773]	A_44_P500820	0.0459785	down	1.17929	Rn.203060
Zc3h7b	zinc finger CCCH-type containing 7B	Rattus norvegicus zinc finger CCCH-type containing 7B (Zc3h7b), mRNA [NM_001130695]	A_43_P10490	0.0352461	down	1.16595	Rn.91605
Ythdf1	YTH domain family, member 1"		A_44_P468803	0.00472528	up	1.16315	chr3:170019806-170019747
Ppil3	peptidylprolyl isomerase (cyclophilin)-like 3	Rattus norvegicus peptidylprolyl isomerase (cyclophilin)-like 3 (Ppil3), mRNA [NM_175707]	A_42_P694171	0.040059	up	1.15722	Rn.14747
		AA943842 EST199341 Normalized rat brain, Bento Soares Rattus sp. cDNA clone RBRAQ36 3' end, mRNA sequence [AA943842]	A_44_P153070	0.0332115	up	1.14303	Rn.202977
Tbca	tubulin folding cofactor A	Rattus norvegicus tubulin folding cofactor A (Tbca), mRNA [NM_001013245]	A_43_P10890	0.0184622	up	1.12307	Rn.185799
Iip45	invasion inhibitory protein 45	Rattus norvegicus invasion inhibitory protein 45 (Iip45), mRNA [NM_001017450]	A_44_P1023938	0.0463549	down	1.12823	Rn.27362
			A_44_P478033	0.0405333	up	1.26525
Vps18	vacuolar protein sorting 18 homolog (S. cerevisiae)	Rattus norvegicus vacuolar protein sorting 18 homolog (S. cerevisiae) (Vps18), mRNA [NM_001106499]	A_44_P471104	0.0149673	down	1.31628	Rn.151911
Fam36a	family with sequence similarity 36, member A"		A_44_P407600	0.0441179	up	1.15338	chr13:93972778-93972837
Odf4	outer dense fiber of sperm tails 4	Rattus norvegicus outer dense fiber of sperm tails 4 (Odf4), mRNA [NM_001007670]	A_44_P427038	0.0322411	up	1.27256	Rn.137152
			A_44_P966888	0.0266274	up	1.35387
Tbc1d22b	TBC1 domain family, member 22B"		A_44_P462364	0.00957675	down	1.21844	chr20:7893856-7893915
Olr1748	olfactory receptor 1748	Rattus norvegicus olfactory receptor 1748 (Olr1748), mRNA [NM_001001428]	A_44_P426128	0.0219473	down	1.2379	Rn.142658
RGD1309220	similar to RIKEN cDNA 4632411B12	Rattus norvegicus similar to RIKEN cDNA 4632411B12 (RGD1309220), mRNA [NM_001034835]	A_44_P466827	0.0139395	down	1.38266	Rn.34623
			A_44_P898412	0.00119795	up	1.4833
Brd8	bromodomain containing 8	Rattus norvegicus bromodomain containing 8 (Brd8), mRNA [NM_001008509]	A_44_P317228	0.0394348	down	1.08999	Rn.98723
Icam5	intercellular adhesion molecule 5, telencephalin"		A_44_P1024907	0.028564	up	1.25147	chr8:20060911-20060970
		Rattus norvegicus similar to olfactory receptor MOR213-5 (LOC295727), mRNA [XM_230074]	A_44_P368143	0.0108943	down	1.10265
		CB546677 AMGNNUC:NRDG1-00177-F2-A nrdg1 (10855) Rattus norvegicus cDNA clone nrdg1-00177-f2 5', mRNA sequence [CB546677]	A_43_P13665	0.0196066	up	1.39676	Rn.6402
Glud1	glutamate dehydrogenase 1	Rattus norvegicus glutamate dehydrogenase 1 (Glud1), mRNA [NM_012570]	A_44_P259908	0.0199975	down	1.18208	Rn.55106
			A_44_P815724	0.0399683	up	1.56487
Chek2	CHK2 checkpoint homolog (S. pombe)	Rattus norvegicus CHK2 checkpoint homolog (S. pombe) (Chek2), mRNA [NM_053677]	A_44_P1032161	0.0378853	down	1.10271	Rn.163213
		AA866235 UI-R-A0-bg-f-10-0-UI.s1 UI-R-A0 Rattus norvegicus cDNA clone UI-R-A0-bg-f-10-0-UI 3', mRNA sequence [AA866235]	A_44_P270353	0.0254621	down	1.28159
		UI-R-BJ1-avl-h-08-0-UI.s10 UI-R-BJ1 Rattus norvegicus cDNA clone UI-R-BJ1-avl-h-08-0-UI 3', mRNA sequence [CK842550]	A_44_P910901	0.0488085	up	1.21764	Rn.216576
			A_44_P501382	0.00651312	down	1.25448
Cox11	COX11 homolog, cytochrome c oxidase assembly protein (yeast)"		A_44_P697841	0.0186625	down	1.22594	chr10:79046169-79046228
Slc30a6	solute carrier family 30 (zinc transporter), member 6"		A_42_P533219	0.0369292	up	1.13668	chr6:20957313-20957254
Tex264	testis expressed 264	Rattus norvegicus testis expressed 264 (Tex264), mRNA [NM_001007665]	A_43_P16646	0.017903	down	1.1515	Rn.13429
Olr662	olfactory receptor 662	Rattus norvegicus olfactory receptor 662 (Olr662), mRNA [NM_001001060]	A_44_P107190	0.0311807	up	1.61005	Rn.142839
Bles03	basophilic leukemia expressed protein BLES03	Rattus norvegicus basophilic leukemia expressed protein BLES03 (Bles03), transcript variant 1, mRNA [NM_001024233]	A_44_P344397	0.0457484	down	1.3534	Rn.7405
LOC691340	similar to stress-induced phosphoprotein 1	PREDICTED: Rattus norvegicus similar to stress-induced phosphoprotein 1 (LOC691340), mRNA [XR_007066]	A_44_P456933	0.0310237	up	1.17815	Rn.196445
			A_44_P590364	0.0414231	up	1.23028
Dnajb13	DnaJ (Hsp40) related, subfamily B, member 13"		A_44_P351621	0.03249	down	1.22231	chr1:157935890-157935831
		Rattus norvegicus antisense RNA overlapping MCH protein mRNA, complete cds. [AF303035]	A_44_P447585	0.024972	down	1.08889	Rn.160145
		AI408734 EST237025 Normalized rat ovary, Bento Soares Rattus sp. cDNA clone ROVEG34 3' end, mRNA sequence [AI408734]	A_44_P239653	0.00952975	down	1.27232	Rn.18295
RGD1562326	similar to ubiquitin-protein ligase E3-alpha	PREDICTED: Rattus norvegicus similar to ubiquitin-protein ligase E3-alpha (predicted) (RGD1562326_predicted), mRNA [XM_001080919]	A_44_P940344	0.0462188	up	1.13703	Rn.164349
		BF412036 UI-R-BT1-bms-f-10-0-UI.s1 UI-R-BT1 Rattus norvegicus cDNA clone UI-R-BT1-bms-f-10-0-UI 3', mRNA sequence [BF412036]	A_44_P270729	0.0283848	down	1.27236	Rn.61986
Thap4	THAP domain containing 4	Rattus norvegicus THAP domain containing 4 (Thap4), mRNA [NM_001005564]	A_44_P199514	0.0143349	down	1.11627	Rn.13958
Ndufa1	NADH dehydrogenase (ubiquinone) 1 alpha subcomplex, 1"		A_44_P362889	0.0252323	up	1.10044	chrX:7727730-7727789
		AW144275 EST294571 Normalized rat ovary, Bento Soares Rattus sp. cDNA clone RGICP06 5' end, mRNA sequence [AW144275]	A_44_P911683	0.0241797	down	1.20847	Rn.122118
Armcx1	armadillo repeat containing, X-linked 1"		A_44_P309513	0.0216166	down	1.18507	chrX:122178868-122178927
Syt9	synaptotagmin IX	Rattus norvegicus synaptotagmin IX (Syt9), mRNA [NM_053324]	A_43_P12765	0.0214638	down	1.77182	Rn.10194
Fbxw9	F-box and WD repeat domain containing 9	Rattus norvegicus F-box and WD repeat domain containing 9 (Fbxw9), mRNA [NM_001081634]	A_44_P351860	0.0355327	down	1.60775	Rn.29201
Fstl5	follistatin-like 5	Rattus norvegicus follistatin-like 5 (Fstl5), mRNA [NM_001108946]	A_44_P234195	0.0201458	up	1.27809	Rn.151470
Ankrd54	ankyrin repeat domain 54	Rattus norvegicus ankyrin repeat domain 54 (Ankrd54), mRNA [NM_001025285]	A_44_P516101	0.0202141	down	1.16806	Rn.28758
		AA818994 UI-R-A0-ao-f-04-0-UI.s1 UI-R-A0 Rattus norvegicus cDNA clone UI-R-A0-ao-f-04-0-UI 3', mRNA sequence [AA818994]	A_44_P248770	0.0361066	down	1.57661
		AMGNNUC:URRG1-00068-C10-A urrg1 (14046) Rattus norvegicus cDNA clone urrg1-00068-c10 5', mRNA sequence [CB547285]	A_44_P394581	0.0329566	up	1.22203	Rn.203598
Eif1	eukaryotic translation initiation factor 1	Rattus norvegicus eukaryotic translation initiation factor 1 (Eif1), mRNA [NM_001105837]	A_44_P397441	0.00380948	down	1.33439	Rn.137199
Elac2	elaC homolog 2 (E. coli)	Rattus norvegicus ELAC2A mRNA, partial cds; alternatively spliced [AF546755]	A_44_P433367	0.0430703	down	1.07916	Rn.163124
RGD1561507	similar to hypothetical protein FLJ31606	Rattus norvegicus similar to hypothetical protein FLJ31606 (RGD1561507), mRNA [NM_001106195]	A_44_P192288	0.0254399	up	1.13632	Rn.206669
		BM986580 EST594174 Rat gene index, normalized rat, norvegicus Rattus norvegicus cDNA clone RGOAD38 3' end, mRNA sequence [BM986580]	A_44_P728429	0.00584439	down	1.65381	Rn.91378
Fam161a	family with sequence similarity 161, member A"		A_42_P543762	0.00531163	down	1.18217	chr14:103702756-103702815
RGD1565840	similar to Dendritic cell protein GA17	PREDICTED: Rattus norvegicus similar to Dendritic cell protein GA17 (predicted) (RGD1565840_predicted), mRNA [XM_215794]	A_44_P469357	0.0296753	up	1.26834	Rn.3390
		AMGNNUC:URRG1-00067-F3-A urrg1 (14046) Rattus norvegicus cDNA clone urrg1-00067-f3 5', mRNA sequence [CB547747]	A_44_P462206	0.0363704	up	1.04887	Rn.203583
			A_44_P555370	0.0158382	up	1.54863
Chrnb2	cholinergic receptor, nicotinic, beta 2 (neuronal)"		A_44_P318628	0.0120888	up	1.13254	chr2:181965748-181962034
Emilin1	elastin microfibril interfacer 1	Rattus norvegicus elastin microfibril interfacer 1 (Emilin1), mRNA [NM_001106710]	A_44_P556531	0.0406402	down	1.20606	Rn.99346
Ace2	angiotensin I converting enzyme (peptidyl-dipeptidase A) 2	Rattus norvegicus angiotensin I converting enzyme (peptidyl-dipeptidase A) 2 (Ace2), mRNA [NM_001012006]	A_43_P18768	0.0196817	down	1.43221	Rn.129779
Pabpc1	poly(A) binding protein, cytoplasmic 1"		A_43_P13245	0.0154511	down	1.44433	chr7:72117159-72117100
Map3k14	mitogen-activated protein kinase kinase kinase 14	Rattus norvegicus mitogen-activated protein kinase kinase kinase 14 (Map3k14), mRNA [NM_001108301]	A_44_P870046	0.0489278	down	1.2286	Rn.47167
Olr1086	olfactory receptor 1086	Rattus norvegicus olfactory receptor 1086 (Olr1086), mRNA [NM_001000419]	A_44_P454331	0.0155251	up	1.23115	Rn.143333
Fbxo40	F-box protein 40	PREDICTED: Rattus norvegicus F-box protein 40 (predicted) (Fbxo40_predicted), mRNA [XM_344023]	A_44_P415274	0.0342499	up	1.38686	Rn.204849
Glo1	glyoxalase 1	Rattus norvegicus glyoxalase 1 (Glo1), mRNA [NM_207594]	A_44_P353553	0.0229991	up	1.15198	Rn.108014
Znf142	zinc finger protein 142 (clone pHZ-49)	Rattus norvegicus zinc finger protein 142 (clone pHZ-49) (Znf142), mRNA [NM_001108225]	A_44_P225691	0.00931266	down	1.2014	Rn.164982
Copb2	coatomer protein complex, subunit beta 2 (beta prime)"		A_44_P110918	0.0190008	up	1.35887
			A_44_P593668	0.0414314	up	1.28183
LOC685144	similar to SEC24 related gene family, member C"		A_43_P17977	0.0358417	down	1.22353	chr15:3831140-3831006
		AI233262 EST229950 Normalized rat kidney, Bento Soares Rattus sp. cDNA clone RKIDC85 3' end, mRNA sequence [AI233262]	A_44_P140846	0.00669308	up	1.38147	Rn.107154
			A_44_P154327	0.0280387	down	1.13497
		PREDICTED: Rattus norvegicus similar to ribosomal protein S2 (predicted) (RGD1559516_predicted), mRNA [XR_007535]	A_44_P501952	0.0478892	down	1.37772	Rn.195552
RGD1311730	similar to RIKEN cDNA 2610507L03	Rattus norvegicus similar to RIKEN cDNA 2610507L03 (RGD1311730), mRNA [NM_001127599]	A_43_P23298	0.0425458	down	1.26847	Rn.161833
Lin7c	lin-7 homolog C (C. elegans)	Rattus norvegicus lin-7 homolog C (C. elegans) (Lin7c), mRNA [NM_021851]	A_44_P429755	0.0148235	up	1.20974	Rn.44269
Npm1	nucleophosmin (nucleolar phosphoprotein B23, numatrin)"		A_44_P1058389	0.0324715	down	1.20005	chr10:18052270-18052211
		AGENCOURT_26737543 NIH_MGC_255 Rattus norvegicus cDNA clone IMAGE:7317653 5', mRNA sequence [CO402766]	A_44_P808013	0.0345446	up	1.25535	Rn.209146
			A_44_P640180	0.0168815	up	1.08254
LOC499469	Ab2-018	Rattus norvegicus Ab2-018 (LOC499469), mRNA [NM_001047940]	A_44_P358338	0.0470115	down	2.57744	Rn.116758
Grin2c	glutamate receptor, ionotropic, N-methyl D-aspartate 2C"		A_42_P738337	0.0163668	down	1.2144	chr10:105323308-105323251
		AA850688 EST193456 Normalized rat ovary, Bento Soares Rattus sp. cDNA clone ROVAJ52 3' end, mRNA sequence [AA850688]	A_44_P681955	0.00506792	down	1.22332	Rn.39346
Myo1b	myosin Ib	Rattus norvegicus myosin Ib (Myo1b), mRNA [NM_053986]	A_44_P557210	0.0453394	up	1.13663	Rn.36339
		AI231476 EST228164 Normalized rat embryo, Bento Soares Rattus sp. cDNA clone REMDK61 3' end, mRNA sequence [AI231476]	A_44_P249315	0.000360843	up	1.88657	Rn.258
		BG379442 UI-R-CS0-bth-a-01-0-UI.s1 UI-R-CS0 Rattus norvegicus cDNA clone UI-R-CS0-bth-a-01-0-UI 3', mRNA sequence [BG379442]	A_44_P516282	0.0423441	down	1.73924	Rn.203420
		Rattus norvegicus partial mRNA for putative connective protein (cnt-1 gene). [AJ566901]	A_44_P212746	0.0309197	down	1.99851	Rn.132021
			A_44_P215837	0.0297843	up	1.19467
Olr1275	olfactory receptor 1275	Rattus norvegicus olfactory receptor 1275 (Olr1275), mRNA [NM_001000800]	A_44_P344214	0.00634019	up	1.75194	Rn.143504
Wnt10a	wingless-type MMTV integration site family, member 10A"		A_44_P342788	0.00209399	up	2.18785	chr9:74134070-74134129
Hapln1	hyaluronan and proteoglycan link protein 1	Rattus norvegicus hyaluronan and proteoglycan link protein 1 (Hapln1), mRNA [NM_019189]	A_44_P120736	0.0374713	down	1.79393	Rn.50531
Wdr48	WD repeat domain 48	Rattus norvegicus WD repeat domain 48 (Wdr48), mRNA [NM_001135895]	A_44_P410455	0.00190888	down	1.17638	Rn.8675
Ntf4	neurotrophin 4	Rattus norvegicus neurotrophin 4 (Ntf4), mRNA [NM_013184]	A_44_P276153	0.0368497	down	1.32766	Rn.44225
Arf4	ADP-ribosylation factor 4	Rattus norvegicus ADP-ribosylation factor 4 (Arf4), mRNA [NM_024151]	A_44_P384223	0.0472747	down	1.13015	Rn.35935
		BF555980 UI-R-A1-dy-b-10-0-UI.r1 UI-R-A1 Rattus norvegicus cDNA clone UI-R-A1-dy-b-10-0-UI 5', mRNA sequence [BF555980]	A_44_P153217	0.0088196	down	1.15976	Rn.217985
RGD1559575	similar to novel protein	PREDICTED: Rattus norvegicus similar to novel protein (predicted) (RGD1559575_predicted), mRNA [XM_001070154]	A_44_P417562	0.0393892	down	1.38499
Dock2	dedicator of cytokinesis 2	Rattus norvegicus dedicator of cytokinesis 2, mRNA (cDNA clone IMAGE:5599905), complete cds. [BC101877]	A_44_P473711	0.0278947	down	1.37686	Rn.178834
		AI639233 rx05007s Rat mixed-tissue library Rattus norvegicus cDNA clone rx05007 3', mRNA sequence [AI639233]	A_44_P350515	0.0169925	down	1.4661	Rn.106103
Fibcd1	fibrinogen C domain containing 1	Rattus norvegicus fibrinogen C domain containing 1 (Fibcd1), mRNA [NM_001107829]	A_44_P450193	0.0267993	down	1.85709	Rn.47612
		AW143125 EST293421 Normalized rat brain, Bento Soares Rattus sp. cDNA clone RGIBD96 5' end, mRNA sequence [AW143125]	A_44_P251140	0.0111629	down	1.7965	Rn.44698
			A_44_P483274	0.0441049	down	2.09813
Tmem116	transmembrane protein 116	Rattus norvegicus transmembrane protein 116, mRNA (cDNA clone IMAGE:7108818), partial cds [BC167104]	A_44_P608167	0.0393507	down	1.23814	Rn.39141
Dyx1c1	dyslexia susceptibility 1 candidate 1 homolog (human)	Rattus norvegicus dyslexia susceptibility 1 candidate 1 homolog (human) (Dyx1c1), mRNA [NM_001007010]	A_43_P20691	0.00452845	down	1.22331	Rn.99120
Plch1	phospholipase C, eta 1"		A_44_P520461	0.0252339	up	1.28541	chr2:153468390-153468331
Gpx3	glutathione peroxidase 3	Rattus norvegicus glutathione peroxidase 3 (Gpx3), mRNA [NM_022525]	A_44_P500949	0.00704863	down	1.22953	Rn.108074
		AI556725 UI-R-C2p-rj-g-05-0-UI.s1 UI-R-C2p Rattus norvegicus cDNA clone UI-R-C2p-rj-g-05-0-UI 3', mRNA sequence [AI556725]	A_44_P879532	0.0358499	down	3.67613	Rn.203095
Igkv28	immunoglobulin kappa chain variable 28 (V28)	Rattus norvegicus NGF-binding Ig rearranged L-chain mRNA, V-region, partial cds [L17078]	A_44_P102557	0.0162953	down	1.20059	Rn.92371
		AW141315 EST291356 Normalized rat brain, Bento Soares Rattus sp. cDNA clone RGIBL61 5' end similar to translation initiation factor sui1 homolog, mRNA sequence [AW141315]	A_44_P183979	0.00575738	down	1.4442	Rn.137199
		BM390150 UI-R-CN1-cjp-j-22-0-UI.s1 UI-R-CN1 Rattus norvegicus cDNA clone UI-R-CN1-cjp-j-22-0-UI 3', mRNA sequence [BM390150]	A_44_P453493	0.0136904	down	1.19249	Rn.1758
Fam58b	family with sequence similarity 58, member B"		A_44_P190229	0.0394567	up	1.11946	chr10:64865412-64865353
Cuedc1	CUE domain containing 1	Rattus norvegicus CUE domain containing 1 (Cuedc1), mRNA [NM_001013971]	A_42_P705866	0.00965961	down	1.47496	Rn.49582
Recql	RecQ protein-like (DNA helicase Q1-like)	Rattus norvegicus RecQ protein-like (DNA helicase Q1-like) (Recql), mRNA [NM_001012098]	A_44_P203967	0.00779127	down	1.22888	Rn.203166
		AMGNNUC:NRHY7-00013-D10-A nrhy7 (10850) Rattus norvegicus cDNA clone nrhy7-00013-d10 5', mRNA sequence [CB580093]	A_43_P18380	0.0425821	down	1.17234	Rn.202182
Nup62cl	nucleoporin 62 C-terminal like	Rattus norvegicus nucleoporin 62 C-terminal like, mRNA (cDNA clone IMAGE:7458042), partial cds [BC160918]	A_44_P971836	0.0202248	up	1.20413	Rn.89460
		AA849743 EST192510 Normalized rat muscle, Bento Soares Rattus sp. cDNA clone RMUAI36 3' end, mRNA sequence [AA849743]	A_44_P130090	0.0346473	up	1.27126	Rn.68281
RGD1564319	similar to TF-1 apoptosis related protein 19	Rattus norvegicus similar to TF-1 apoptosis related protein 19 (RGD1564319), mRNA [NM_001126290]	A_44_P248352	0.0351898	down	1.23399	Rn.133972
		BF286660 EST451251 Rat Gene Index, normalized rat, Rattus norvegicus cDNA Rattus norvegicus cDNA clone RGIFR82 5' sequence, mRNA sequence [BF286660]	A_44_P223624	0.0403494	up	1.4656	Rn.162277
Rnase4	ribonuclease, RNase A family 4"		A_44_P532057	0.0230784	up	1.09993	chr15:27083869-27083928
RGD1563634	similar to R31449_3	Rattus norvegicus similar to R31449_3 (RGD1563634), mRNA [NM_001081447]	A_42_P655728	0.0312792	down	1.22624	Rn.136995
		AI407017 EST235305 Normalized rat ovary, Bento Soares Rattus sp. cDNA clone ROVDV20 3' end, mRNA sequence [AI407017]	A_44_P169188	0.015484	down	1.27783	Rn.107173
		BF387347 UI-R-CA1-bbr-d-06-0-UI.s1 UI-R-CA1 Rattus norvegicus cDNA clone UI-R-CA1-bbr-d-06-0-UI 3', mRNA sequence [BF387347]	A_44_P237988	0.0241521	up	1.55622	Rn.17645
		BE107024 UI-R-BT1-ass-f-11-0-UI.s1 UI-R-BT1 Rattus norvegicus cDNA clone UI-R-BT1-ass-f-11-0-UI 3', mRNA sequence [BE107024]	A_44_P512381	0.0418319	up	1.2173	Rn.171025
Grm8	glutamate receptor, metabotropic 8"		A_44_P186818	0.0267644	up	1.21015	chr4:53983310-53976813
		BF285100 EST449691 Rat Gene Index, normalized rat, Rattus norvegicus cDNA Rattus norvegicus cDNA clone RGIFA45, mRNA sequence [BF285100]	A_44_P446056	0.0351224	down	1.48552	Rn.15221
		AGENCOURT_28540268 NIH_MGC_249 Rattus norvegicus cDNA clone IMAGE:7375741 5', mRNA sequence [CO561061]	A_44_P751482	0.0448559	down	1.15616	Rn.16560
RGD1308297	similar to CG10084-PA	Rattus norvegicus similar to CG10084-PA, mRNA (cDNA clone IMAGE:7131439) [BC082039]	A_44_P229440	0.0448551	up	1.10599	Rn.28431
LOC691574	similar to ubiquitin-associated protein 1	PREDICTED: Rattus norvegicus similar to ubiquitin-associated protein 1 (predicted) (LOC686963), mRNA [XM_001076515]	A_42_P755133	0.0139248	down	1.21786	Rn.107376
RGD1304731	similar to RIKEN cDNA 5330437I02 gene	Rattus norvegicus similar to RIKEN cDNA 5330437I02 gene (RGD1304731), mRNA [NM_001106139]	A_44_P142573	0.0415534	up	1.66387	Rn.70441
		AI171576 EST217542 Normalized rat muscle, Bento Soares Rattus sp. cDNA clone RMUBM75 3' end, mRNA sequence [AI171576]	A_44_P370927	0.0466154	down	1.32855	Rn.37469
		AI136102 UI-R-C2p-ny-b-07-0-UI.s1 UI-R-C2p Rattus norvegicus cDNA clone UI-R-C2p-ny-b-07-0-UI 3', mRNA sequence [AI136102]	A_44_P444469	0.0189611	up	1.13042	Rn.162750
		UI-R-C2-nc-f-09-0-UI.s1 UI-R-C2 Rattus norvegicus cDNA clone UI-R-C2-nc-f-09-0-UI 3', mRNA sequence [AI071717]	A_44_P327665	0.0215676	up	1.31542	Rn.204315
Tpx2	TPX2, microtubule-associated, homolog (Xenopus laevis)"		A_44_P515852	0.0275366	up	1.11767	chr3:143232410-143232469
		AW917120 EST348424 Rat gene index, normalized rat, norvegicus, Bento Soares Rattus norvegicus cDNA clone RGIDZ48 5' end, mRNA sequence [AW917120]	A_44_P937141	0.0294265	up	1.10432
		BE105548 UI-R-BX0-ash-b-02-0-UI.s1 UI-R-BX0 Rattus norvegicus cDNA clone UI-R-BX0-ash-b-02-0-UI 3', mRNA sequence [BE105548]	A_44_P169313	0.0436049	up	1.15891	Rn.7652
Adamtsl1	ADAMTS-like 1	Rattus norvegicus similar to ADAM-TS related protein 1 isoform 2; ADAM-TS related protein 1; thrombospondin; punctin (LOC362539), mRNA [XM_342858]	A_44_P555719	0.0314564	up	1.33903	Rn.105496
Col11a1	collagen, type XI, alpha 1"		A_44_P272045	0.0211736	up	1.16874	chr2:210147814-210149028
Mobkl2a	MOB1, Mps One Binder kinase activator-like 2A (yeast)"		A_44_P319187	0.00953315	down	1.26266	chr7:10532067-10532126
LOC691274	hypothetical protein LOC691274	Rattus norvegicus similar to T cell receptor V-alpha J-alpha (LOC364347), mRNA [XM_344370]	A_44_P140202	0.0306641	down	1.31738
			A_44_P724334	0.0032345	up	1.12668
		UI-R-BS0-amk-b-06-0-UI.r1 UI-R-BS0 Rattus norvegicus cDNA clone UI-R-BS0-amk-b-06-0-UI 5', mRNA sequence [BF564797]	A_44_P796993	0.01481	up	1.24891	Rn.169986
Usp32	ubiquitin specific protease 32	Rattus norvegicus ubiquitin specific protease 32 (Usp32), mRNA [NM_001107032]	A_44_P255934	0.00151476	up	1.26962	Rn.16359
Samd12	sterile alpha motif domain containing 12	Rattus norvegicus sterile alpha motif domain containing 12 (Samd12), mRNA [NM_001130562]	A_44_P232186	0.0248976	up	1.26764	Rn.220495
		Rattus norvegicus similar to testis-specific transporter TST-2 (LOC367321), mRNA [XM_346079]	A_44_P150075	0.0100673	down	1.51
Rps2	ribosomal protein S2	Rattus norvegicus ribosomal protein S2 (Rps2), mRNA [NM_031838]	A_44_P264441	0.0262268	down	1.36139	Rn.2115
Cabp7	calcium binding protein 7	Rattus norvegicus calcium binding protein 7 (Cabp7), mRNA [NM_001007730]	A_44_P481199	0.0322235	up	1.12495	Rn.220068
			A_44_P686919	0.0369754	down	1.28546
Arl13a	ADP-ribosylation factor-like 13A	Rattus norvegicus ADP-ribosylation factor-like 13A (Arl13a), mRNA [NM_001024366]	A_44_P698085	0.0134288	up	1.34797	Rn.123458
		BF408425 UI-R-BJ2-brc-f-01-0-UI.s1 UI-R-BJ2 Rattus norvegicus cDNA clone UI-R-BJ2-brc-f-01-0-UI 3', mRNA sequence [BF408425]	A_44_P289799	0.035067	up	1.35151	Rn.15775
RGD1559497	similar to tripartite motif-containing 65	Rattus norvegicus similar to 52 kDa Ro protein (Sjogren syndrome type A antigen) (SS-A) (Ro(SS-A)) (52 kDa ribonucleoprotein autoantigen Ro/SS-A) (LOC303684), mRNA [XM_221125]	A_44_P316908	0.0430773	down	1.37661
		Rattus norvegicus cdig1U mRNA for hypothetical protein, complete cds [AB086233]	A_44_P283153	0.0221451	down	1.08312
		Rattus norvegicus cDNA clone IMAGE:7446637 [BC097994]	A_44_P253876	0.0464144	down	1.30999	Rn.1708
Trpv1	transient receptor potential cation channel, subfamily V, member 1"		A_43_P12709	0.00562276	down	1.30094	chr10:60128102-60128161
Pak6	p21 (CDKN1A)-activated kinase 6	Rattus norvegicus p21 (CDKN1A)-activated kinase 6 (Pak6), mRNA [NM_001106498]	A_44_P478233	0.0485588	up	1.17693	Rn.218297
F2rl3	coagulation factor II (thrombin) receptor-like 3	Rattus norvegicus coagulation factor II (thrombin) receptor-like 3 (F2rl3), mRNA [NM_053808]	A_44_P519917	0.0205015	down	1.13359	Rn.81079
Olr1382	olfactory receptor 1382	Rattus norvegicus olfactory receptor 1382 (Olr1382), mRNA [NM_214831]	A_44_P531711	0.0156597	up	1.16292	Rn.142190
Eif2s1	eukaryotic translation initiation factor 2, subunit 1 alpha"		A_44_P245391	0.0490324	up	1.08563	chr6:101516066-101518066
RGD1560796	similar to suppressor of hairy wing homolog 4 isoform 1	Rattus norvegicus similar to cDNA sequence BC028839; hypothetical protein MGC38010 (LOC363092), mRNA [XM_343424]	A_44_P204109	0.047105	up	1.49413	Rn.162988
Grm6	glutamate receptor, metabotropic 6"		A_44_P414242	0.0447146	up	1.28581	chr10:36436418-36436477
		Dystrophin (Fragment). [Source:UniProtKB/Swiss-Prot;Acc:P11530] [ENSRNOT00000035692]	A_43_P16282	0.0443634	up	1.14222
		PREDICTED: Rattus norvegicus similar to kallikrein 5 preproprotein (LOC690603), mRNA [XM_001074943]	A_44_P365642	0.0317327	down	2.64694
			A_44_P625829	0.0324311	down	1.17316
			A_44_P206008	0.0185864	down	1.15779
		AW143880 EST294176 Normalized rat embryo, Bento Soares Rattus sp. cDNA clone RGICC09 5' end, mRNA sequence [AW143880]	A_44_P106581	0.00628978	down	1.19676	Rn.218757
		BI282204 UI-R-CU0s-cbx-h-02-0-UI.s1 UI-R-CU0s Rattus norvegicus cDNA clone UI-R-CU0s-cbx-h-02-0-UI 3', mRNA sequence [BI282204]	A_44_P230799	0.00397809	up	1.81147	Rn.15123
		Rattus norvegicus similar to Zinc finger protein 42 (Zfp-42) (REX-1 protein) (Reduced expression-1 protein) (LOC290765), mRNA [XM_224882]	A_44_P224918	0.0251497	up	1.14661
RGD1566034	similar to polycystic kidney disease 1 like 1	Rattus norvegicus similar to polycystin-1L1; polycystic kidney disease 1 like 1 (LOC364193), mRNA [XM_344260]	A_44_P515664	0.00766203	down	1.63377
		AW525988 UI-R-BO1-aiy-a-05-0-UI.s1 UI-R-BO1 Rattus norvegicus cDNA clone UI-R-BO1-aiy-a-05-0-UI 3', mRNA sequence [AW525988]	A_44_P129848	0.0449461	up	1.30371	Rn.9036
LOC366928	similar to 40S ribosomal protein S16	PREDICTED: Rattus norvegicus similar to 40S ribosomal protein S16 (LOC366928), mRNA [XR_006590]	A_44_P591026	0.0449613	down	1.31362	Rn.197430
		AW521110 UI-R-BO0-agp-c-12-0-UI.s1 UI-R-BO0 Rattus norvegicus cDNA clone UI-R-BO0-agp-c-12-0-UI 3', mRNA sequence [AW521110]	A_44_P381228	0.026594	down	1.2494	Rn.44273
Ss18	synovial sarcoma translocation, Chromosome 18"		A_44_P222603	0.0172489	down	1.1529	chr18:5897399-5885186
		BM386990 UI-R-CN1-cji-i-13-0-UI.s1 UI-R-CN1 Rattus norvegicus cDNA clone UI-R-CN1-cji-i-13-0-UI 3', mRNA sequence [BM386990]	A_44_P218329	0.0292272	up	1.37168	Rn.8424
Kin	antigenic determinant of rec-A protein	Rattus norvegicus antigenic determinant of rec-A protein (Kin), mRNA [NM_001109529]	A_44_P1011538	0.0216165	down	1.04846	Rn.53701
Msl2l1	male-specific lethal 2-like 1 (Drosophila)	Rattus norvegicus similar to KIAA1585 protein (LOC315959), mRNA [XM_236567]	A_43_P19339	0.0165022	down	1.25595	Rn.9626
		RNVASV2R R.norvegicus vasopressin V2 receptor gene, promoter [X83264]	A_44_P212894	0.0308685	up	1.16356
		AI716055 UI-R-Y0-acd-e-04-0-UI.s1 UI-R-Y0 Rattus norvegicus cDNA clone UI-R-Y0-acd-e-04-0-UI 3', mRNA sequence [AI716055]	A_44_P453196	0.00238029	up	1.24792	Rn.102073
		AW533219 UI-R-BU0-ana-b-12-0-UI.s1 UI-R-BU0 Rattus norvegicus cDNA clone UI-R-BU0-ana-b-12-0-UI 3', mRNA sequence [AW533219]	A_44_P514658	0.0226858	up	1.70447	Rn.6136
Zfp217	zinc finger protein 217	Rattus norvegicus zinc finger protein 217 (Zfp217), mRNA [NM_001107813]	A_44_P487627	0.0226395	up	1.32823	Rn.214135
Pmpca	peptidase (mitochondrial processing) alpha	RATMPP Rat general mitochondrial matrix processing protease (MPP) mRNA, 3' end [M57728]	A_43_P15635	0.0198857	down	1.27883	Rn.11175
			A_44_P531925	0.0353013	down	2.42609
Isy1	ISY1 splicing factor homolog (S. cerevisiae)	Rattus norvegicus ISY1 splicing factor homolog (S. cerevisiae) (Isy1), mRNA [NM_001014188]	A_43_P16724	0.00255748	down	1.29978	Rn.25170
			A_44_P394270	0.0497835	up	2.62385
		AF071214 Rattus norvegicus odorant receptor J418 mRNA, partial cds [AF071214]	A_44_P130534	0.0156502	down	1.10888
Snrpd1	small nuclear ribonucleoprotein D1	Rattus norvegicus small nuclear ribonucleoprotein D1 (Snrpd1), mRNA [NM_001106163]	A_42_P653673	0.0325536	up	1.18012	Rn.18606
Ctsl1	cathepsin L1	Rattus norvegicus cathepsin L1 (Ctsl1), mRNA [NM_013156]	A_44_P109600	0.0475465	down	1.09901	Rn.1294
Hdac4	histone deacetylase 4	Histone deacetylase 4 (HD4). [Source:UniProtKB/Swiss-Prot;Acc:Q99P99] [ENSRNOT00000027622]	A_44_P463888	0.0280598	down	1.36649	Rn.23483
RGD1564088	similar to 60S ribosomal protein L29 (P23)	Rattus norvegicus similar to 60S RIBOSOMAL PROTEIN L29 (P23) (LOC291290), mRNA [XM_225531]	A_44_P203838	0.00880371	up	1.08341
Argbp2	Arg/Abl-interacting protein ArgBP2	AF396458 Rattus norvegicus sorbin polypeptide mRNA, partial cds [AF396458]	A_44_P323372	0.0431686	up	1.06588	Rn.24612
Iqce	IQ motif containing E	PREDICTED: Rattus norvegicus IQ motif containing E (predicted) (Iqce_predicted), mRNA [XM_221965]	A_44_P398238	0.0153973	down	1.0861	Rn.62392
RGD1564163	similar to RIKEN cDNA 1700025K23	Rattus norvegicus similar to RIKEN cDNA 1700025K23 (RGD1564163), mRNA [NM_001109266]	A_44_P562685	0.00221307	down	1.30325	Rn.6676
		AGENCOURT_28537166 NIH_MGC_246 Rattus norvegicus cDNA clone IMAGE:7373123 5', mRNA sequence [CO574987]	A_44_P302923	0.0215246	down	1.22998	Rn.215775
Acap3	ArfGAP with coiled-coil, ankyrin repeat and PH domains 3"		A_44_P478430	0.017347	down	1.16196	chr5:172761986-172762045
LOC294165	similar to Elongation factor 2 (EF-2)	PREDICTED: Rattus norvegicus similar to Elongation factor 2 (EF-2) (LOC294165), mRNA [XR_005581]	A_44_P393956	0.0269573	down	1.22347	Rn.196942
Rpl27	ribosomal protein L27	Rattus norvegicus ribosomal protein L27 (Rpl27), mRNA [NM_022514]	A_44_P463378	0.0440865	down	1.12269	Rn.1254
Guca1a	guanylate cyclase activator 1a (retina)	Rattus norvegicus guanylate cyclase activator 1a (retina) (Guca1a), mRNA [NM_001106887]	A_44_P494869	0.0437539	down	1.09021	Rn.39165
			A_44_P558042	0.0462156	down	1.29034
Ywhaz	tyrosine 3-monooxygenase/tryptophan 5-monooxygenase activation protein, zeta polypeptide"		A_44_P416641	0.0440995	up	1.14843	chr7:72284609-72284550
		AI556730 UI-R-C2p-rj-g-10-0-UI.s1 UI-R-C2p Rattus norvegicus cDNA clone UI-R-C2p-rj-g-10-0-UI 3', mRNA sequence [AI556730]	A_44_P381564	0.0223844	down	1.27625	Rn.98374
			A_44_P485079	0.00957962	up	1.23718
			A_44_P575132	0.0106725	down	1.19469
			A_44_P898176	0.0199941	down	1.25063	Rn.195697
Cdc42bpa	CDC42 binding protein kinase alpha	Rattus norvegicus CDC42 binding protein kinase alpha (Cdc42bpa), mRNA [NM_053657]	A_44_P366832	0.0337594	down	1.18901	Rn.10871
		Rattus norvegicus similar to RIKEN cDNA D930010O20 gene (LOC365035), mRNA [XM_344790]	A_44_P517939	0.0234509	down	3.0402
		Rattus norvegicus similar to putative ionotropic glutamate receptor GLURR-F11694B (LOC317015), mRNA [XM_229646]	A_44_P175837	0.0147105	down	1.17336
Yy1	YY1 transcription factor	Rattus norvegicus YY1 transcription factor (Yy1), mRNA [NM_173290]	A_43_P13424	0.0216773	down	1.1793	Rn.162877
		AA924747 UI-R-A1-ed-h-01-0-UI.s1 UI-R-A1 Rattus norvegicus cDNA clone UI-R-A1-ed-h-01-0-UI 3' similar to gi [AA924747]	A_44_P819950	0.0130827	up	1.44938	Rn.161973
		RNAPH R.norvegicus gene for acyl-peptide hydrolase [X14915]	A_44_P232755	0.00950191	up	1.97776
RGD1563398	RGD1563398	PREDICTED: Rattus norvegicus RGD1563398 (predicted) (RGD1563398_predicted), mRNA [XM_238565]	A_44_P396474	0.0318592	down	1.32322	Rn.161975
Olr715	olfactory receptor 715	Rattus norvegicus olfactory receptor 715 (Olr715), mRNA [NM_001000623]	A_44_P236001	0.0204061	up	1.20012	Rn.142800
Rplp2	ribosomal protein, large P2"		A_44_P531848	0.0475984	down	1.49479	chr1:201636630-201637535
		BF403405 UI-R-CA1-biy-m-12-0-UI.s1 UI-R-CA1 Rattus norvegicus cDNA clone UI-R-CA1-biy-m-12-0-UI 3', mRNA sequence [BF403405]	A_44_P111313	0.0075532	up	1.98119	Rn.40643
Cry2	cryptochrome 2 (photolyase-like)	Rattus norvegicus cryptochrome 2 (photolyase-like) (Cry2), mRNA [NM_133405]	A_43_P13175	0.010743	down	1.23363	Rn.21150
RGD1560277	similar to RIKEN cDNA D330012F22 gene	PREDICTED: Rattus norvegicus similar to RIKEN cDNA D330012F22 gene (predicted) (RGD1560277_predicted), mRNA [XM_218822]	A_44_P496721	0.0335013	down	1.06684	Rn.46338
		Rattus norvegicus similar to Ig heavy chain V region 441 precursor (LOC299434), mRNA [XM_234680]	A_44_P450421	0.044968	down	1.16782
Tmem63a	transmembrane protein 63a	Rattus norvegicus transmembrane protein 63a (Tmem63a), mRNA [NM_001134496]	A_44_P170821	0.0451077	down	1.12148	Rn.19355
Rnf44	ring finger protein 44	Rattus norvegicus ring finger protein 44 (Rnf44), mRNA [NM_001024795]	A_44_P475795	0.0434942	up	1.60296	Rn.21345
		Rattus norvegicus similar to Anillin (LOC363031), mRNA [XM_343362]	A_44_P117175	0.0299398	down	1.28507
Cyp2u1	cytochrome P450, family 2, subfamily u, polypeptide 1"		A_44_P119264	0.0463386	down	1.26791	chr2:228775873-228775814
		AI102717 EST212006 Normalized rat embryo, Bento Soares Rattus sp. cDNA clone REMBR65 3' end, mRNA sequence [AI102717]	A_44_P552014	0.0337247	up	1.13504	Rn.163656
Afaf	Acrosome formation associated factor	Rattus norvegicus Acrosome formation associated factor (Afaf), mRNA [NM_001039345]	A_44_P575662	0.0278805	up	1.14243	Rn.126103
		Rattus norvegicus chromosome 8, 32 clones, strain BN/SsNHsdMCW RNOR03312996, whole genome shotgun sequence [AABR03063000]	A_44_P455715	0.0287879	up	1.34498	Rn.207938
Mprip	myosin phosphatase Rho interacting protein	Rattus norvegicus myosin phosphatase Rho interacting protein (Mprip), transcript variant 1, mRNA [NM_053814]	A_42_P647009	0.0363211	down	1.07551	Rn.2641
LOC294816	similar to ribosomal protein L7a	PREDICTED: Rattus norvegicus similar to ribosomal protein L7a (LOC294816), mRNA [XR_005888]	A_44_P518101	0.0322005	down	1.38758	Rn.197872
Kcnj4	potassium inwardly-rectifying channel, subfamily J, member 4"		A_44_P252491	0.0112596	up	1.07144	chr7:117602560-117602501
Ermp1	endoplasmic reticulum metallopeptidase 1	Rattus norvegicus endoplasmic reticulum metallopeptidase 1 (Ermp1), mRNA [NM_184050]	A_44_P356579	0.0119454	down	1.25549	Rn.99609
		BE115614 UI-R-BJ1-avw-h-12-0-UI.s1 UI-R-BJ1 Rattus norvegicus cDNA clone UI-R-BJ1-avw-h-12-0-UI 3', mRNA sequence [BE115614]	A_44_P185673	0.0488512	up	1.35702	Rn.80611
Cpeb3	cytoplasmic polyadenylation element binding protein 3	PREDICTED: Rattus norvegicus similar to mKIAA0940 protein (predicted) (RGD1564670_predicted), mRNA [XM_220043]	A_44_P264947	0.00553087	up	1.19581	Rn.106130
		Rattus norvegicus similar to cDNA sequence BC010552 (LOC295417), mRNA [XM_227648]	A_44_P178080	0.0320349	up	1.17564
Olr862	olfactory receptor 862	Rattus norvegicus olfactory receptor 862 (Olr862), mRNA [NM_001001071]	A_44_P334810	0.0176735	up	2.03846	Rn.143176
Glt8d3	glycosyltransferase 8 domain containing 3	Rattus norvegicus similar to CG9996-PA (LOC300173), mRNA [XM_217027]	A_44_P1013472	0.0298842	up	1.12229	Rn.14826
Olr1642	olfactory receptor 1642	Rattus norvegicus olfactory receptor 1642 (Olr1642), mRNA [NM_001000832]	A_44_P393325	0.0323353	up	1.53942	Rn.142430
		BC006913 Fbx14l protein {Mus musculus} (exp=-1; wgp=0; cg=0), partial (38%) [TC589092]	A_44_P806236	0.0294254	down	1.24455
Atg16l1	ATG16 autophagy related 16-like 1 (S. cerevisiae)	Rattus norvegicus ATG16 autophagy related 16-like 1 (S. cerevisiae) (Atg16l1), mRNA [NM_001108809]	A_44_P525665	0.0424677	down	1.10162	Rn.101734
Ppcs	phosphopantothenoylcysteine synthetase	Rattus norvegicus phosphopantothenoylcysteine synthetase (Ppcs), mRNA [NM_001039010]	A_42_P511615	0.0453431	up	1.11335	Rn.15017
		BF395191 UI-R-CM0-bjj-h-09-0-UI.s1 UI-R-CM0 Rattus norvegicus cDNA clone UI-R-CM0-bjj-h-09-0-UI 3', mRNA sequence [BF395191]	A_44_P434428	0.0211966	up	1.21141
LOC686980	similar to arsenate resistance protein 2	PREDICTED: Rattus norvegicus similar to arsenate resistance protein 2 (LOC686980), mRNA [XM_001076594]	A_44_P810190	0.0416069	up	1.08736
Stat5b	signal transducer and activator of transcription 5B	Rattus norvegicus signal transducer and activator of transcription 5B (Stat5b), mRNA [NM_022380]	A_43_P12209	0.0496007	down	1.16525	Rn.54486
			A_44_P899198	0.0182137	up	1.14582
Olr89	olfactory receptor 89	Rattus norvegicus olfactory receptor 89 (Olr89), mRNA [NM_001000745]	A_44_P533869	0.0105335	up	1.12266	Rn.141897
Slc26a7	solute carrier family 26, member 7"		A_44_P398612	0.0051185	up	1.88592	chr5:28901517-28901375
Adamts2	ADAM metallopeptidase with thrombospondin type 1 motif, 2"		A_44_P466832	0.0342748	down	1.24836	chr10:36170141-36170200
		AA899649 UI-R-E0-dg-h-07-0-UI.s1 UI-R-E0 Rattus norvegicus cDNA clone UI-R-E0-dg-h-07-0-UI 3' similar to gi [AA899649]	A_44_P547385	0.0236736	up	1.55071	Rn.14961
[truncated: 118 more rows]

## Sheet: 7Days inj w age p05
GeneSymbol	GeneName	Description	ID	p-value	regulation	FCAbsolute	UniGeneID
[truncated: 1,491 more rows]

[truncated: 4 more sheets: Venn inj 30mAnd3daysAnd7daysP05, Venn inj 3days and 7days p05, Venn inj 30min and 3days p05, Venn inj 30min and 7days p05]
